# Supplementary material for: Plasma Proteomics of COVID-19 Associated Cardiovascular Complications: Implications for Pathophysiology and Therapeutics
Source: Res Sq. 2021 Jun 8:rs.3.rs-539712. Preprint. [Version 1] doi: 10.21203/rs.3.rs-539712/v1 (PMC8202429; doi:10.21203/rs.3.rs-539712/v1)
Supplement: Supplement 1 [file f100dc077851b385b8917fca.xlsx]

## Sheet: Table S2_NES Ranked.
Supplementary Table 2. List of pathways significantly enriched for in gene set enrichment analysis of PC1 proteins
To identify biological processes enriched for in our principle components analysis (PCA), gene set enrichment analysis (GSEA, Broad Institute) was performed using Gene Ontology (GO) data, along with SASP protein sets (Supplementary Table 3). Since PC1 clustered subjects into their pre-specified groups, we included all PC1 proteins in the GSEA. Pathways are ranked according to a) normalized enrich…
PATHWAY	Set Size	Enrichment Score	NES	p-value	p adjusted	qvalues	core_enrichment
SENESCENCE_ASSOCIATED_SECRETORY_PHENOTYPE_1	130	0.501607	2.19597	2.50451e-05	0.00956436	0.00832418	VIM/SOD1/HSP90AA1/HSP90AB1/NUCB1/CLEC11A/ARHGDIA/HSPA8/YWHAQ/LDHB/AKR1A1/STC1/ALDOA/AGRN/HNRNPA2B1/PSME1/TXNRD1/PEBP1/HSP90B1/GPI/PTX3/CXCL1/CALR/CST3/PARK7/GSTO1/IGFBP4/CTSD/TNC/GDF15/IGFBP2/TALDO1/HSPE1/PLOD3/YWHAB/C3/GAPDH/GSTP1/EZR/GDI2/HSPG2/HSPA5/MIF/HMGB1/FLNA/CTSB/UCHL1/PRKCSH/TAGLN2/PPIB/TPI1/THBS1/LGALS3BP/COL6A3/CTSZ/TKT/COL6A2/EIF4A1/MDH1/AKR1B1/PPIA/APP/PXDN/YWHAZ/HEXB/GLO1/PRDX6/TAG…
GO_RNA_BINDING	370	0.447827	2.17652	2.18794e-05	0.00956436	0.00832418	VIM/PSMA6/DCN/CELF2/HSP90AA1/G3BP2/HSP90AB1/NOP16/RPS27A/RPL12/YBX1/HDGF/SRSF6/UBE2L3/ERH/G3BP1/ILF3/NCL/PSMA1/PSIP1/DUT/LONP1/RBM39/HNRNPA1/TAF15/PUF60/HSPA1A/HSPA8/TRA2B/SUB1/SF1/XRCC6/EIF3G/PABPC3/SNRPG/IFI16/SSRP1/EWSR1/HNRNPDL/RBM23/ALDOA/PDIA4/SRSF7/RRBP1/HNRNPAB/HNRNPA2B1/STAU1/HNRNPD/SRA1/HNRNPK/RPL30/PABPC4/RPS7/SUMO2/PABPN1/HDLBP/HNRNPM/PEBP1/BAG4/EIF1AX/FKBP4/HSP90B1/HSPA1B/TNRC6B/DDX3…
GO_INTRINSIC_APOPTOTIC_SIGNALING_PATHWAY_IN_RESPONSE_TO_DNA_DAMAGE	44	0.590638	2.15786	5.6899e-05	0.0109219	0.00950571	BCL2/TNFRSF1B/ABL1/IFI16/HTRA2/HNRNPK/MCL1/CHEK2/BID/TPT1/CDKN1A/TNFRSF1A/CXCL12/BAD/MUC1/MIF/SFN/RPS3/CASP2/SNAI2/PIAS4/HMOX1/EPHA2
GO_RIBONUCLEOPROTEIN_COMPLEX	126	0.480113	2.09283	2.51439e-05	0.00956436	0.00832418	VIM/PSMA6/CELF2/G3BP2/RPS27A/RPL12/YBX1/G3BP1/ILF3/NCL/PSMA1/HNRNPA1/HSPA1A/HSPA8/TRA2B/SF1/EIF3G/PABPC3/SNRPG/HNRNPDL/RBM23/HNRNPAB/HNRNPA2B1/HNRNPD/SRA1/HNRNPK/RPL30/PABPC4/RPS7/PABPN1/HNRNPM/HSPA1B/DDX39B/MRPL34/MRPL52/HNRNPF/CALR/SNRPA/PES1/RPS4X/HSF1/TARBP2/GAPDH/RBM17/SSB/SNRPB2/SNRPD2/EIF4A3/RPS3/ELAVL1/PPIE/NUP98/AGO3/CIRBP/RPS5/MAGOHB/SRP14
GO_MRNA_TRANSPORT	35	0.5989	2.08462	5.83635e-05	0.0109219	0.00950571	G3BP2/SRSF6/HNRNPA1/NXT1/SRSF7/HNRNPA2B1/PABPN1/DDX39B/TNKS/HSF1/PARP11/CETN3/THOC1/NXF1/EIF4A3/NUP98/SEC13/MAGOHB/EIF5A/AGFG1/YTHDC1/EIF5A2/FMR1
GO_CELLULAR_RESPONSE_TO_HEAT	51	0.552806	2.07839	5.59738e-05	0.0109219	0.00950571	HSP90AA1/HSP90AB1/HSPA1A/HSPA8/PTGS2/CAMK2A/HTRA2/BAG4/CXCL10/FKBP4/HSPA1B/HSF1/CDKN1A/CAMK2B/CAMK2D/DNAJB6/HSPA5/HDAC2/NUP98/HSPH1/DNAJB1/THBS1/HSPA9/SEC13/CREBBP/HMOX1
GO_NUCLEAR_EXPORT	53	0.546818	2.07136	2.78777e-05	0.00956436	0.00832418	TGFB1/SRSF6/HNRNPA1/NXT1/SRSF7/HNRNPA2B1/RANBP3/PABPN1/DDX39B/CALR/PARK7/IL1B/SSB/CHP1/THOC1/SMURF1/SFN/NXF1/EIF4A3/NUP98/HSPA9/SEC13/MAGOHB/PTPN11/EIF5A/AGFG1/YTHDC1/ANP32B/RAN
GO_REGULATION_OF_MRNA_PROCESSING	34	0.590779	2.04332	0.000117058	0.0123373	0.0107375	CELF2/SRSF6/NCL/HNRNPA1/TRA2B/SRSF7/HNRNPA2B1/HNRNPK/PABPN1/SNRPA/RBFOX2/SAP18/HSF1/RBM19/RBM17
GO_POSITIVE_REGULATION_OF_MITOCHONDRION_ORGANIZATION	48	0.549241	2.03975	8.46334e-05	0.012114	0.0105432	BCL2/DCN/FAM162A/UBE2L3/YWHAQ/YWHAH/CHCHD10/HTRA2/PDCD5/GZMB/BID/TNFSF10/PARK7/CDC37/YWHAB/PLAUR/PPP3R1/BAD/SMURF1/SFN/HK2/CSNK2A2
GO_REGULATION_OF_MRNA_METABOLIC_PROCESS	99	0.481527	2.02926	2.6001e-05	0.00956436	0.00832418	VIM/PSMA6/CELF2/PSMA2/RPS27A/YBX1/SRSF6/NCL/PSMA1/HNRNPA1/TAF15/HSPA1A/HSPA8/TRA2B/PSME2/SRSF7/HNRNPA2B1/PSME1/HNRNPD/HNRNPK/PABPC4/PABPN1/HNRNPM/TNRC6B/VIP/MAPK14/PSMB4/APEX1/SNRPA/RBFOX2/SAP18/PSMD7/HSF1/YWHAB/RBM19/RBM17/GDNF/PSMA7/PSMD10/ELAVL1/NUP98/CIRBP/EXOSC8/UBB/UBC/PSMD11/YWHAZ/PSME3/YTHDC1/PRDX6
GO_ALTERNATIVE_MRNA_SPLICING_VIA_SPLICEOSOME	16	0.704913	2.02562	0.000221582	0.0172123	0.0149804	CELF2/SRSF6/HNRNPA1/TRA2B/SRSF7/HNRNPM/RBFOX2/SAP18/RBM19/RBM17
GO_REGULATION_OF_MRNA_SPLICING_VIA_SPLICEOSOME	26	0.622688	2.02358	0.000181703	0.0162624	0.0141537	CELF2/SRSF6/NCL/HNRNPA1/TRA2B/SRSF7/HNRNPA2B1/HNRNPK/RBFOX2/SAP18/RBM19/RBM17/NUP98/CIRBP/YTHDC1/PRDX6/FMR1
GO_NUCLEOBASE_CONTAINING_COMPOUND_TRANSPORT	44	0.551964	2.01656	8.53485e-05	0.012114	0.0105432	G3BP2/SRSF6/HNRNPA1/NXT1/SRSF7/HNRNPA2B1/GJA1/PABPN1/DDX39B/TNKS/HSF1/PARP11/CETN3/SSB/THOC1/NXF1/EIF4A3/NUP98/SEC13/MAGOHB/PURA/EIF5A/AGFG1/YTHDC1/RAN/EIF5A2/FMR1
GO_PROTEIN_FOLDING_CHAPERONE	18	0.679231	2.01578	0.000219106	0.0172123	0.0149804	HSP90AA1/HSP90AB1/PFDN2/HSPA1A/HSPA8/HSPA1B/CALR/PFDN1/HSPA5/DNAJB1/HSPA9
GO_REGULATION_OF_CELLULAR_RESPONSE_TO_HEAT	29	0.603052	2.01079	0.000329115	0.0202234	0.017601	HSP90AA1/HSP90AB1/HSPA1A/HSPA8/CAMK2A/BAG4/FKBP4/HSPA1B/HSF1/CAMK2B/CAMK2D/DNAJB6/NUP98/HSPH1/DNAJB1/SEC13/CREBBP
GO_MRNA_METABOLIC_PROCESS	193	0.436692	2.00507	2.36742e-05	0.00956436	0.00832418	VIM/PSMA6/CELF2/PSMA2/MED1/RPS27A/RPL12/YBX1/SRSF6/NCL/PSMA1/PSIP1/RBM39/HNRNPA1/TAF15/PUF60/HSPA1A/HSPA8/TRA2B/SF1/PABPC3/PSME2/SNRPG/RBM23/SRSF7/HNRNPA2B1/PSME1/HNRNPD/EDC4/HNRNPK/RPL30/PABPC4/RPS7/PABPN1/RPRD1B/HNRNPM/RNGTT/HSPA1B/TNRC6B/VIP/DDX39B/MAPK14/HNRNPF/PSMB4/APEX1/SNRPA/RBFOX2/SAP18/RPS4X/PSMD7/HSF1/YWHAB/RBM19/RBM17/SSB/POLR2J/GDNF/SNRPB2/SNRPD2/THOC1/FLNA/PSMA7/EIF4A3/RPS3/PSMD10/E…
GO_ESTABLISHMENT_OF_RNA_LOCALIZATION	44	0.548806	2.00503	8.53485e-05	0.012114	0.0105432	G3BP2/SRSF6/HNRNPA1/NXT1/SRSF7/HNRNPA2B1/PABPN1/DDX39B/TNKS/HSF1/PARP11/CETN3/SSB/THOC1/NXF1/EIF4A3/NUP98/SEC13/MAGOHB/PURA/EIF5A/AGFG1/TERF1/YTHDC1/RAN/EIF5A2/FMR1
GO_POSITIVE_REGULATION_OF_RELEASE_OF_CYTOCHROME_C_FROM_MITOCHONDRIA	13	0.737845	2.00409	0.000256748	0.0185102	0.01611	FAM162A/CHCHD10/PDCD5/BID/TNFSF10/PLAUR/BAD
GO_MRNA_EXPORT_FROM_NUCLEUS	22	0.639555	1.99731	0.000337537	0.0204359	0.017786	SRSF6/NXT1/SRSF7/HNRNPA2B1/PABPN1/DDX39B/THOC1/NXF1/EIF4A3/NUP98/SEC13/MAGOHB/EIF5A/AGFG1/YTHDC1
GO_PROTEIN_INSERTION_INTO_MEMBRANE	24	0.621965	1.98198	0.000365742	0.0206269	0.0179522	BCL2/HSP90AA1/YWHAQ/YWHAH/PDCD5/GZMB/BID/YWHAB/RTP4/PPP3R1/BAD/SFN/YWHAG/YWHAZ/UBL4A
GO_PROTEIN_INSERTION_INTO_MITOCHONDRIAL_MEMBRANE	20	0.645564	1.96988	0.000463278	0.022439	0.0195294	BCL2/HSP90AA1/YWHAQ/YWHAH/PDCD5/GZMB/BID/YWHAB/PPP3R1/BAD/SFN
GO_RNA_EXPORT_FROM_NUCLEUS	27	0.599158	1.96473	0.000422055	0.022439	0.0195294	SRSF6/HNRNPA1/NXT1/SRSF7/HNRNPA2B1/PABPN1/DDX39B/SSB/THOC1/NXF1/EIF4A3/NUP98/SEC13/MAGOHB/EIF5A/AGFG1/YTHDC1/RAN
GO_NEGATIVE_REGULATION_OF_CELL_KILLING	13	0.722177	1.96153	0.000481402	0.0230457	0.0200574	HSP90AB1/IL4/HLA-G/HAVCR2/IL7R/CRK/KIR2DL4/LGALS9
GO_MRNA_BINDING	66	0.495606	1.95733	0.00010887	0.012114	0.0105432	CELF2/G3BP2/G3BP1/ILF3/NCL/HNRNPA1/TAF15/TRA2B/PABPC3/HNRNPAB/HNRNPA2B1/HNRNPD/RPL30/PABPC4/RPS7/HNRNPM/CALR/PARK7/RBFOX2/SSB/DENR/NXF1/EIF4A3/RPS3/ELAVL1/PPIE/NUP98/PURB/CIRBP/RPS5/EXOSC8/EIF4A1/DHFR/EIF4G2/FMR1/TYMS/SLPI/RPS3A
SENESCENCE_ASSOCIATED_SECRETORY_PHENOTYPE_2	403	0.400042	1.95723	2.16244e-05	0.00956436	0.00832418	VIM/SOD1/BCL2/DCN/IL11/HSP90AA1/TGFB1/PSMA2/CCL27/HSP90AB1/NID1/IL4/RPL12/NUCB1/CLEC11A/ARHGDIA/NCL/VEGFC/HNRNPA1/TNFRSF1B/HSPA8/YWHAQ/LDHB/CCL20/STC1/ALDOA/PDIA4/XCL1/YWHAH/RRBP1/B4GALT1/CD14/AGRN/THBS2/HGF/PSME1/FGF7/IL1RL1/TXNRD1/IL6/ICAM3/IL1RN/HNRNPD/ESM1/HNRNPK/TXNDC5/PCNA/SPP1/B2M/PEBP1/AREG/CXCL10/PYGL/TGFB2/HSP90B1/GPI/WARS/PTX3/CXCL1/BMP4/TNFSF10/PSMB4/FSTL3/CALR/CCL7/CXCL11/CCL13/CST3/…
GO_INTRINSIC_APOPTOTIC_SIGNALING_PATHWAY_IN_RESPONSE_TO_DNA_DAMAGE_BY_P53_CLASS_MEDIATOR	15	0.689528	1.94948	0.000571701	0.0240958	0.0209713	BCL2/IFI16/HNRNPK/CHEK2/CDKN1A/MUC1/MIF
GO_INTERFERON_GAMMA_MEDIATED_SIGNALING_PATHWAY	36	0.556687	1.94837	0.000349172	0.0204495	0.0177979	FCGR1A/MED1/HSP90AB1/CAMK2A/HLA-G/B2M/IRF4/STAT1/CDC37/PTPN2/CAMK2B/NMI/GBP1/CAMK2D/IRF9/GBP2/IRF3/IRF6
GO_REGULATION_OF_MITOCHONDRIAL_MEMBRANE_PERMEABILITY_INVOLVED_IN_APOPTOTIC_PROCESS	26	0.597172	1.94066	0.000423973	0.022439	0.0195294	BCL2/HSPA1A/YWHAQ/YWHAH/CAMK2A/CHCHD10/GZMB/BID/YWHAB/PPP3R1/BAD/SFN
GO_CELLULAR_RESPONSE_TO_HYDROGEN_PEROXIDE	41	0.538359	1.94017	0.000314798	0.0199388	0.0173534	ABL1/HGF/IL6/LCN2/PCNA/APEX1/PARK7/RHOB/HSF1/MAP1LC3A/NET1/ANXA1/IL18RAP/RPS3/HDAC2/PDGFD
GO_RNA_SPLICING_VIA_TRANSESTERIFICATION_REACTIONS	74	0.481272	1.93792	8.05412e-05	0.012114	0.0105432	CELF2/YBX1/SRSF6/NCL/PSIP1/HNRNPA1/PUF60/HSPA8/TRA2B/SF1/SNRPG/SRSF7/HNRNPA2B1/HNRNPD/HNRNPK/PABPN1/HNRNPM/DDX39B/HNRNPF/SNRPA/RBFOX2/SAP18/RBM19/RBM17/POLR2J/SNRPB2/SNRPD2/EIF4A3/ELAVL1/PPIE/NUP98/CIRBP/MAGOHB
GO_SIGNAL_TRANSDUCTION_BY_P53_CLASS_MEDIATOR	78	0.473989	1.92456	0.000106875	0.012114	0.0105432	BCL2/RBBP4/ARID3A/TAF15/HINT1/IFI16/SSRP1/RBL2/HNRNPK/RPS7/PCNA/CHEK2/MAPK14/TBP/EDA2R/MAPKAPK5/CSNK2A1/CDKN1A/BATF/FOXM1/CHEK1/MUC1/MIF/SFN/CSNK2A2/PSMD10/HDAC2/SPRED1/CASP2/SNAI2/UBB/HEXIM1/BRPF1
GO_CELLULAR_DEFENSE_RESPONSE	24	0.601083	1.91544	0.000731484	0.0278845	0.0242687	CD300C/SH2D1A/LBP/HLA-G/KIR3DL2/TRAT1/GNLY/NCR2/LILRB2/KIR2DL4/IL1RL2/NCF2/CXCL9/LGALS3BP/NCF1
GO_PRE_MRNA_BINDING	13	0.704323	1.91304	0.000994897	0.0330322	0.028749	CELF2/SRSF6/HNRNPA1/TRA2B/SF1/HNRNPA2B1/TARBP2
GO_REGULATION_OF_MITOCHONDRIAL_OUTER_MEMBRANE_PERMEABILIZATION_INVOLVED_IN_APOPTOTIC_SIGNALING_PATHWAY	21	0.618721	1.9111	0.000800295	0.0294762	0.0256541	BCL2/HSPA1A/YWHAQ/YWHAH/CHCHD10/GZMB/BID/YWHAB/PPP3R1/BAD/SFN
GO_INTERLEUKIN_10_PRODUCTION	34	0.549115	1.89922	0.000497498	0.0232713	0.0202538	PRKCZ/CLEC7A/TSLP/ISG15/XCL1/HGF/DLL1/IRF4/LILRA5/CD47/CD40LG/HMGB1/LGALS9/IL23R/HSPD1/TRIB2/MMP8/TNFSF4
GO_METHYLTRANSFERASE_COMPLEX	21	0.614783	1.89894	0.000923418	0.031825	0.0276984	RBBP4/ERH/SNRPG/DPY30/WDR5/RBBP5/ASH2L/SNRPD2/MAX/HDAC2
GO_POSTTRANSCRIPTIONAL_REGULATION_OF_GENE_EXPRESSION	167	0.419297	1.89368	2.41435e-05	0.00956436	0.00832418	VIM/PSMA6/TGFB1/PSMA2/RPS27A/YBX1/ILF3/NCL/PSMA1/TAF15/HSPA1A/TNFRSF1B/HSPA8/PSME2/HNRNPA2B1/PSME1/IL6/HNRNPD/RPL30/PABPC4/HNRNPM/TNRC6B/VIP/DDX39B/BMP4/MAPK14/PSMB4/CALR/APEX1/CDC37/RPS4X/YBX2/PSMD7/MAPKAPK5/EIF4EBP2/TARBP2/YWHAB/GAPDH/POLR2J/FOXO3/GDNF/EIF5/PSMA7/GCNT2/EIF4E2/EIF4A3/RPS3/PSMD10/ELAVL1/NUP98/AGO3/CIRBP/THBS1/EXOSC8/SEC13/UBB/PURA/UBC/EIF5A/DHFR/AGO1/APP/PSMD11/YWHAZ/EIF4G2/PSME3…
GO_REGULATION_OF_MITOCHONDRION_ORGANIZATION	70	0.473926	1.89101	0.000161795	0.015235	0.0132595	BCL2/DCN/FAM162A/UBE2L3/HSPA1A/YWHAQ/YWHAH/HGF/CHCHD10/HTRA2/PDCD5/BAG4/GZMB/BID/TNFSF10/PARK7/CDC37/YWHAB/RNF41/PLAUR/PPP3R1/BAD/SMURF1/SFN/HK2/CSNK2A2/PSMD10
GO_TRANSLATION_REGULATOR_ACTIVITY	41	0.524435	1.88999	0.000457889	0.022439	0.0195294	EIF3G/EIF1AX/EIF4EBP2/EIF1AD/EIF5/DENR/EIF4E2/EIF4A3/EEF1B2/CIRBP/PURA/EIF4A1/EIF5A/DHFR/EIF4G2/EIF5A2/FMR1/TYMS/EIF1AY/EIF2S1/EIF4B/MTRF1L/SHMT1/EIF4A2/EIF4EBP1/EIF4H
GO_REGULATION_OF_MEGAKARYOCYTE_DIFFERENTIATION	20	0.618944	1.88865	0.00117364	0.0371682	0.0323487	DPY30/WDR5/KAT2B/TNRC6B/RBBP5/ASH2L/TESC/AGO3/THBS1/THPO/PRKCQ/AGO1/HMGB2
GO_MITOCHONDRIAL_OUTER_MEMBRANE_PERMEABILIZATION	24	0.592026	1.88658	0.000944834	0.0318843	0.0277499	BCL2/HSPA1A/YWHAQ/YWHAH/CHCHD10/GZMB/BID/YWHAB/PPP3R1/BAD/SFN
GO_INTRINSIC_APOPTOTIC_SIGNALING_PATHWAY_BY_P53_CLASS_MEDIATOR	24	0.589983	1.88007	0.00109723	0.035789	0.0311483	BCL2/HINT1/IFI16/HNRNPK/RPS7/CHEK2/EDA2R/CDKN1A/MUC1/MIF
GO_REGULATION_OF_CELL_AGING	17	0.640739	1.87249	0.00147618	0.0402478	0.035029	ABL1/HLA-G/B2M/FOXM1/MIF/KIR2DL4/HMGA2/PTEN/NAMPT/MAP3K3
GO_POSITIVE_REGULATION_OF_MITOCHONDRIAL_OUTER_MEMBRANE_PERMEABILIZATION_INVOLVED_IN_APOPTOTIC_SIGNALING_PATHWAY	19	0.621421	1.87084	0.00146058	0.0402478	0.035029	BCL2/YWHAQ/YWHAH/CHCHD10/GZMB/BID/YWHAB/PPP3R1/BAD/SFN/YWHAG/YWHAZ
GO_CELLULAR_RESPONSE_TO_DNA_DAMAGE_STIMULUS	220	0.401889	1.86991	2.32894e-05	0.00956436	0.00832418	BCL2/ASF1A/MBD4/RPS27A/XRCC4/BRD4/ARID3A/TNFRSF1B/UBQLN4/XRCC6/ABL1/IFI16/SSRP1/ISG15/MAPK12/POLE3/RBL2/HTRA2/HNRNPK/MCL1/SMC3/PCNA/RECQL/CHEK2/MPG/KIF22/BID/DDX39B/MAPK14/APEX1/TPT1/RBBP5/PARK7/ASH2L/RNF8/ADPRHL2/HSF1/CDKN1A/RAD23A/BATF/RAD23B/FOXM1/RBM17/NUDT16L1/TNFRSF1A/SETMAR/CXCL12/POLR2J/BAD/FH/CHEK1/MUC1/THOC1/MIF/SFN/HMGB1/CUL4B/HMGA2/RPS3/PSMD10/SPRED1/PPIE/CASP2/SNAI2/CBX3/PIAS4/TDP1/P…
GO_SPLICEOSOMAL_COMPLEX_ASSEMBLY	10	0.739763	1.86279	0.00131092	0.0382769	0.0333136	CELF2/SRSF6/PSIP1/SF1/SNRPG/DDX39B/SNRPD2
GO_FICOLIN_1_RICH_GRANULE	83	0.452647	1.85757	0.000159143	0.015235	0.0132595	HSP90AA1/PSMA2/HSP90AB1/HSPA1A/HSPA8/XRCC6/ALDOA/PAFAH1B2/PYGL/HSPA1B/GPI/MAPK14/CST3/CTSD/PRDX4/GNS/PSMD7/LTA4H/ASAH1/IMPDH1/GSTP1/CAT/KRT1/MIF/CAB39/HMGB1/SERPINA1/CTSB/PDAP1/COMMD9/PPIE/GMFG/SRP14/CTSZ/PPIA/PSMD11/ARSB
GO_CELLULAR_RESPONSE_TO_ANTIBIOTIC	55	0.485296	1.85288	0.000416135	0.022439	0.0195294	HNRNPA1/ABL1/HGF/IL6/LCN2/PCNA/APEX1/PARK7/RHOB/HSF1/MAP1LC3A/HSPA5/NET1/ANXA1/IL18RAP/RPS3/HDAC2/PTEN/PDGFD
GO_MRNA_PROCESSING	104	0.436609	1.85249	7.75114e-05	0.012114	0.0105432	CELF2/YBX1/SRSF6/NCL/PSIP1/RBM39/HNRNPA1/PUF60/HSPA8/TRA2B/SF1/SNRPG/RBM23/SRSF7/HNRNPA2B1/HNRNPD/HNRNPK/PABPN1/RPRD1B/HNRNPM/RNGTT/DDX39B/HNRNPF/SNRPA/RBFOX2/SAP18/HSF1/RBM19/RBM17/POLR2J/SNRPB2/SNRPD2/THOC1/EIF4A3/ELAVL1/PPIE/NUP98/CIRBP/MAGOHB/CCNH/SMNDC1
GO_RNA_LOCALIZATION	53	0.487411	1.84632	0.000446043	0.022439	0.0195294	G3BP2/SRSF6/HNRNPA1/NXT1/SRSF7/HNRNPA2B1/PABPN1/DDX39B/TNKS/HSF1/PARP11/CETN3/SSB/THOC1/NXF1/EIF4A3/NUP98/SEC13/MAGOHB/PURA/EIF5A/AGFG1/TERF1/YTHDC1/RAN/EIF5A2/FMR1/TCP1/SNUPN
GO_NEGATIVE_REGULATION_OF_RESPONSE_TO_DNA_DAMAGE_STIMULUS	29	0.553016	1.84395	0.0012267	0.037991	0.0330648	BCL2/UBQLN4/CHEK2/BID/DDX39B/TPT1/HSF1/NUDT16L1/CXCL12/MUC1/THOC1/MIF/HMGA2/RPS3/PSMD10/SNAI2
GO_POSITIVE_REGULATION_OF_MEMBRANE_PERMEABILITY	26	0.567354	1.84376	0.00151419	0.0407445	0.0354613	BCL2/HSPA1A/YWHAQ/YWHAH/CHCHD10/GZMB/BID/YWHAB/PPP3R1/BAD/SFN
GO_PROTEIN_CONTAINING_COMPLEX_LOCALIZATION	67	0.465073	1.84134	0.000162822	0.015235	0.0132595	PRKCZ/SRSF6/NXT1/SRSF7/HNRNPA2B1/NETO1/PABPN1/DYNLL2/FKBP4/DDX39B/STX3/SYNJ2BP/MX1/SSB/EZR/DLG2/ATAD1/STX7/THOC1/NXF1/EIF4A3/GPC6/NUP98/SEC13/MAGOHB/PURA/DAG1/EIF5A/AGFG1/TERF1/YTHDC1/RAN
GO_MEGAKARYOCYTE_DIFFERENTIATION	27	0.561186	1.84022	0.00153749	0.0411028	0.0357731	IL11/MED1/DPY30/WDR5/KAT2B/PTPN6/TNRC6B/RBBP5/ASH2L/TESC/AGO3/THBS1/THPO/PTPN11/PRKCQ/AGO1/HMGB2
GO_PROTEIN_INSERTION_INTO_MITOCHONDRIAL_MEMBRANE_INVOLVED_IN_APOPTOTIC_SIGNALING_PATHWAY	18	0.618736	1.83625	0.00231626	0.049667	0.0432268	BCL2/YWHAQ/YWHAH/GZMB/BID/YWHAB/PPP3R1/BAD/SFN/YWHAG/YWHAZ
GO_ORGANIC_CYCLIC_COMPOUND_CATABOLIC_PROCESS	201	0.397989	1.8354	2.35278e-05	0.00956436	0.00832418	VIM/PSMA6/HMOX2/MBD4/PSMA2/RPS27A/RPL12/YBX1/UPP1/PSMA1/DUT/TAF15/HSPA1A/TNFRSF1B/HSPA8/HINT1/PSME2/PDE1A/ASRGL1/YWHAH/DNASE1L2/PSME1/IL6/PDE7A/HNRNPD/EDC4/RPL30/PABPC4/RPS7/SPP1/HNRNPM/NUDT9/HSPA1B/TNRC6B/VIP/NUDT5/MAPK14/PSMB4/APEX1/HPRT1/RPS4X/PSMD7/HSF1/KYNU/PDXP/YWHAB/RNASE6/TYMP/SSB/SETMAR/NUDT3/SCARF1/QDPR/GDNF/RNASE2/HMGB1/CNP/PSMA7/EIF4A3/RPS3/PSMD10/BLVRA/ELAVL1/DCTPP1/PCBD1/AGO3/CIRBP/…
GO_REGULATION_OF_MACROAUTOPHAGY	46	0.496728	1.83053	0.000538061	0.0240782	0.020956	DCN/IL4/TBK1/UBQLN4/SPTLC2/CAPNS1/UBQLN2/PAFAH1B2/HTRA2/VPS26A/CDC37/GAPDH/RNF41/SMURF1/UCHL1
GO_POSITIVE_REGULATION_OF_APOPTOTIC_SIGNALING_PATHWAY	82	0.446639	1.82947	0.000265266	0.0185102	0.01611	SOD1/BCL2/FAM162A/YWHAQ/YWHAH/CHCHD10/HTRA2/MCL1/RPS7/PDCD5/INHBB/GZMB/BID/TNFSF10/LCK/PARK7/PTPN2/YWHAB/SFRP1/PLAUR/PPP3R1/BAD/SFN/LGALS9/RPS3/S100A9/CASP2/PTEN/THBS1/PIAS4/UBB/PEA15/YWHAG/YWHAZ
GO_REGULATION_OF_RNA_SPLICING	37	0.518393	1.82583	0.00127562	0.037991	0.0330648	CELF2/SRSF6/NCL/HNRNPA1/HSPA1A/TRA2B/SRSF7/HNRNPA2B1/HNRNPK/HNRNPF/RBFOX2/SAP18/RBM19/RBM17
GO_REGULATION_OF_CELL_CYCLE_ARREST	31	0.539106	1.82561	0.00145509	0.0402478	0.035029	HSP90AB1/ARID3A/RBL2/PCNA/CHEK2/CALR/ID2/CDKN1A/FOXM1/SETMAR/MUC1/MIF/SFN/HMGA2/CASP2
GO_POSITIVE_REGULATION_OF_INTRINSIC_APOPTOTIC_SIGNALING_PATHWAY	24	0.572107	1.8231	0.00222493	0.0484658	0.0421814	SOD1/BCL2/MCL1/RPS7/BID/LCK/PARK7/PTPN2/BAD/RPS3/S100A9/PIAS4/UBB
GO_POSITIVE_REGULATION_OF_ESTABLISHMENT_OF_PROTEIN_LOCALIZATION_TO_MITOCHONDRION	28	0.548087	1.81297	0.00192146	0.0452037	0.0393423	BCL2/UBE2L3/YWHAQ/YWHAH/HTRA2/PDCD5/GZMB/BID/YWHAB/PPP3R1/BAD/SFN/CSNK2A2
GO_MODIFICATION_DEPENDENT_PROTEIN_BINDING	27	0.552767	1.81261	0.00217057	0.0480443	0.0418145	BRD4/UBQLN4/WDR5/UBQLN2/DNAJB2/ING1/PTPN6/RBBP5/RAD23A/RAD23B/L3MBTL2/BRD2
GO_RESPONSE_TO_INTERFERON_GAMMA	100	0.429266	1.81193	0.000103853	0.012114	0.0105432	VIM/FCGR1A/MED1/HSP90AB1/CCL20/XCL1/CAMK2A/HLA-G/EDN1/B2M/CCL23/STX8/IRF4/CCL7/CCL13/STAT1/CDC37/PTPN2/KYNU/CD47/CXCL16/CAMK2B/NMI/GBP1/GAPDH/CAMK2D/MRC1/CCL14/CCL2/IL12RB1/LGALS9/STX4/IRF9/CCL24/CCL3/IL23R/GBP2/IRF3/CCL15/IRF6/CCL26/GCH1
GO_UNFOLDED_PROTEIN_BINDING	62	0.463467	1.80926	0.000438825	0.022439	0.0195294	HSP90AA1/HSP90AB1/PFDN2/HSPA1A/HSPA8/NUDC/DNAJB2/GRPEL1/HTRA2/HSP90B1/HSPA1B/NUDCD3/CALR/CDC37/PFDN1/ERLEC1/HSPE1/DNAJB6/HSPA5/AIP/PPIE/ST13/PPIB/PFDN5/DNAJB1/HSPA9/HSPD1/PPIA/DNAJB11/PDRG1/HSPA13/NAP1L4/TCP1/DNAJA4/DNAJB4/CCT8/DNAJA2
GO_CELLULAR_NITROGEN_COMPOUND_CATABOLIC_PROCESS	183	0.395932	1.80793	4.76679e-05	0.0103289	0.00898955	VIM/PSMA6/HMOX2/MBD4/PSMA2/RPS27A/RPL12/YBX1/UPP1/PSMA1/DUT/TAF15/HSPA1A/TNFRSF1B/HSPA8/HINT1/PSME2/PDE1A/DNASE1L2/PSME1/IL6/PDE7A/HNRNPD/EDC4/RPL30/PABPC4/RPS7/HNRNPM/NUDT9/HSPA1B/TNRC6B/VIP/NUDT5/MAPK14/PSMB4/APEX1/HPRT1/RPS4X/PSMD7/HSF1/KYNU/PDXP/YWHAB/RNASE6/TYMP/SSB/SETMAR/NUDT3/GDNF/POR/RNASE2/HMGB1/CNP/PSMA7/EIF4A3/RPS3/PSMD10/BLVRA/ELAVL1/DCTPP1/AGO3/CIRBP/RPS5/EXOSC8/MAGOHB/HMOX1/UBB/SMP…
GO_T_CELL_MEDIATED_IMMUNITY	52	0.478556	1.80685	0.000809039	0.0294762	0.0256541	PRKCZ/IL4/TNFRSF1B/FAM49B/XCL1/HLA-G/IL18/IL7R/IL6/B2M/HPRT1/IL1B/CLEC4G/IL18R1/BTN3A3/IL12RB1/STX7/HMGB1/JAG1/IL18RAP/IL23R/HSPD1/MICB/IL31RA
GO_NUCLEOSIDE_PHOSPHATE_CATABOLIC_PROCESS	34	0.522327	1.80657	0.00137544	0.039437	0.0343233	MBD4/UPP1/DUT/HINT1/PDE1A/PDE7A/NUDT9/NUDT5/HPRT1/NUDT3/CNP/DCTPP1/SMPDL3A/NUDT1/ENTPD3
GO_RESPONSE_TO_HEAT	72	0.450281	1.80501	0.000350102	0.0204495	0.0177979	SOD1/HSP90AA1/HSP90AB1/PSIP1/HSPA1A/HSPA8/PTGS2/CAMK2A/CD14/HTRA2/BAG4/CXCL10/FKBP4/HSPA1B/HSF1/CDKN1A/CAMK2B/CAMK2D/DNAJB6/CXCL12/HSPA5/HDAC2/NUP98/HSPH1/DNAJB1/THBS1/HSPA9/SEC13/CREBBP/HMOX1/MICB/MAPT/HSPA13/LRP11/EIF2S1
GO_CYTOKINE_MEDIATED_SIGNALING_PATHWAY	432	0.367198	1.80376	2.15248e-05	0.00956436	0.00832418	VIM/PSMA6/SOD1/BCL2/IL11/HSP90AA1/TGFB1/FCGR1A/PSMA2/MED1/HSP90AB1/RPS27A/IL4/CD4/TSLP/TBK1/TNFRSF8/IL22RA1/PSMA1/NANOG/SHC1/HSPA1A/TNFRSF1B/HSPA8/PTGS2/IL21R/CSF1/IL17RB/PSME2/IL15RA/IFNL1/CCL20/IL24/HNRNPDL/LBP/ISG15/XCL1/CAMK2A/HLA-G/IL18/HNRNPA2B1/HGF/IL7R/PSME1/IL1RL1/IL6/LCN2/IFNL2/TNFRSF6B/IL1RN/EDN1/LMNB1/MCL1/TNFRSF13B/SAA1/B2M/RALA/CCL23/PRTN3/BAG4/CEBPA/CXCL10/CAPZA1/IL2RG/PTPN6/HSP90B…
GO_PROTEIN_LOCALIZATION_TO_CELL_SURFACE	33	0.524451	1.80219	0.00158828	0.0411852	0.0358448	BDNF/HSP90AB1/JAM3/FGF7/KCNAB2/STX3/GGA1/TAX1BP3/FBLN5/SMURF1/FLNA/GGA3/STX4/CD177/ACTN2
GO_REGULATION_OF_ESTABLISHMENT_OF_PROTEIN_LOCALIZATION_TO_MITOCHONDRION	34	0.520783	1.80123	0.00146323	0.0402478	0.035029	BCL2/UBE2L3/YWHAQ/YWHAH/HTRA2/PDCD5/BAG4/GZMB/BID/YWHAB/PPP3R1/BAD/SFN/CSNK2A2/YWHAG/YWHAZ/MAPT
GO_CHEMOKINE_ACTIVITY	42	0.495105	1.79268	0.00137119	0.039437	0.0343233	CCL27/CCL20/XCL1/CCL23/CXCL10/CXCL1/CCL7/CXCL11/CCL13/CXCL14/CXCL13/CXCL8/CXCL16/CXCL12/CCL14/CCL2/CXCL5/CCL24/CCL3/CXCL9/CCL28/CCL15/CCL26/C5
GO_REGULATION_OF_VIRAL_GENOME_REPLICATION	33	0.520582	1.78889	0.00170593	0.0425656	0.0370462	BCL2/ILF3/IFI16/ISG15/STAU1/NR5A2/MX1/RAD23A/CXCL8/TARBP2/HMGA2/STOM/PPIE/PPIB/VAPA/PPIA/FMR1/SLPI/LTF/APOBEC3G/OAS1/CCL8
GO_RESPONSE_TO_HYDROGEN_PEROXIDE	71	0.447084	1.78879	0.000511729	0.0232713	0.0202538	SOD1/BCL2/ABL1/HGF/IL6/LCN2/GLRX2/PCNA/AREG/APEX1/PARK7/STAT1/RHOB/CRK/HSF1/MAP1LC3A/CAT/BAD/PRDX3/NET1/ANXA1/IL18RAP/RPS3/HDAC2/PDGFD/HMOX1
GO_MITOCHONDRIAL_MEMBRANE_ORGANIZATION	39	0.500098	1.7825	0.00169848	0.0425656	0.0370462	BCL2/HSP90AA1/HSPA1A/YWHAQ/YWHAH/CAMK2A/DNAJC11/CHCHD10/PDCD5/GZMB/BID/YWHAB/PPP3R1/BAD/SFN/CNP/HK2
GO_TRANSLATIONAL_INITIATION	46	0.483103	1.78032	0.00147259	0.0402478	0.035029	RPS27A/RPL12/EIF3G/RPL30/RPS7/EIF1AX/RPS4X/EIF4EBP2/EIF1AD/EIF5/DENR/EIF4E2/RPS3/RPS5/EIF4A1/EIF4G2/FMR1/RPS19/EIF1AY/EIF2S1/RPS3A/HABP4/EIF4B/EIF4A2/EIF4EBP1/RPLP2/EIF4H
GO_PROTEIN_FOLDING	109	0.416209	1.77839	0.000153933	0.015235	0.0132595	HSP90AA1/DNAJC19/HSP90AB1/PFDN2/HSPA1A/HSPA8/PDIA4/NUDC/DNAJB2/GRPEL1/PDCD5/BAG4/FKBP4/HSP90B1/HSPA1B/NUDCD3/NPPA/CALR/CDC37/PFDN1/PRDX4/GRN/CSNK2A1/RAD23B/HSPE1/DNAJB6/ENGASE/PDIA6/HSPA5/CSNK2A2/AIP/PPIE/PRKCSH/NPPB/ST13/PPIB/PFDN5/HSPH1/DNAJB1/HSPA9/HSPD1/PPIA/ERP44/DNAJB11/PDRG1/HSPA13/PDILT/TCP1/DNAJA4/DNAJB4/ERP29/CCT8/TBCA/DNAJA2/TBCE
GO_TRANSLATION_REGULATOR_ACTIVITY_NUCLEIC_ACID_BINDING	32	0.521057	1.77818	0.00227407	0.0490175	0.0426615	EIF3G/EIF1AX/EIF1AD/EIF5/DENR/EIF4E2/EEF1B2/PURA/EIF4A1/EIF5A/DHFR/EIF4G2/EIF5A2/TYMS/EIF1AY/EIF2S1/EIF4B/MTRF1L/SHMT1/EIF4A2/EIF4H
GO_PEPTIDE_BIOSYNTHETIC_PROCESS	146	0.399154	1.77358	9.8464e-05	0.012114	0.0105432	VIM/RPS27A/RPL12/ILF3/NCL/EIF3G/FURIN/RRBP1/IL6/HNRNPD/RPL30/PABPC4/RPS7/ELANE/EIF1AX/BDH2/TNRC6B/DDX39B/MRPL34/MRPL52/CALR/GSS/RPS4X/YBX2/MAPKAPK5/EIF4EBP2/EIF1AD/TARBP2/GAPDH/FOXO3/EIF5/DENR/EIF4E2/EIF4A3/RPS3/ELAVL1/PPA1/EEF1B2/AGO3/CIRBP/RPS5/THBS1/PURA/EIF4A1/EIF5A/DHFR/AGO1/APP/EIF4G2/GCLM/SARS2/CNDP2/MRPL33/RHOA/EIF5A2/FMR1/TYMS/RPS19/EIF1AY/EIF2S1/RPS3A/HABP4/STAT3/EIF4B/MTRF1L/PPA2/ERBB2…
GO_SINGLE_STRANDED_DNA_BINDING	35	0.50895	1.77152	0.00210109	0.0472687	0.0411395	YBX1/LONP1/HNRNPA1/SUB1/HNRNPA2B1/HNRNPK/HSF1/RAD23A/RAD23B/SETMAR/HMGB1/ANXA1/PURB/TOP1/TDP1/PURA/HSPD1/HMGB2/TERF1/MAPT
GO_REGULATION_OF_SIGNAL_TRANSDUCTION_BY_P53_CLASS_MEDIATOR	50	0.472269	1.7687	0.00126224	0.037991	0.0330648	BCL2/RBBP4/TAF15/SSRP1/HNRNPK/RPS7/CHEK2/MAPK14/TBP/MAPKAPK5/CSNK2A1/CHEK1/MUC1/MIF/CSNK2A2/PSMD10/HDAC2/SPRED1/SNAI2/UBB/HEXIM1/BRPF1
GO_MITOCHONDRIAL_TRANSPORT	63	0.451355	1.76756	0.000656832	0.0264646	0.023033	BCL2/HSP90AA1/DNAJC19/UBE2L3/HSPA1A/YWHAQ/YWHAH/CAMK2A/GRPEL1/CHCHD10/HTRA2/PDCD5/BAG4/GZMB/BID/SLC25A18/YWHAB/PPP3R1/BAD/SFN/CNP/HK2/CSNK2A2/AIP
GO_DNA_METABOLIC_PROCESS	224	0.376681	1.75603	4.64608e-05	0.0103289	0.00898955	HSP90AA1/TGFB1/ASF1A/MBD4/HSP90AB1/RPS27A/IL4/LONP1/XRCC4/HNRNPA1/UBQLN4/XRCC6/ABL1/SSRP1/ISG15/DNASE1L2/HNRNPA2B1/HGF/IL7R/IL6/POLE3/HNRNPD/SMC3/GLRX2/PCNA/GJA1/RECQL/CHEK2/MPG/KIF22/DDX39B/GNAS/APEX1/TNKS/PARK7/RNF8/ADPRHL2/FGFR4/HSF1/MAPKAPK5/CDKN1A/RAD23A/BATF/RAD23B/FOXM1/RBM17/NUDT16L1/SETMAR/POLR2J/CD40LG/FH/CHEK1/THOC1/HMGB1/GREM1/CUL4B/HMGA2/RPS3/DCTPP1/PPIE/TOP1/PIAS4/TDP1/SWAP70/UBB/PR…
GO_SEQUENCE_SPECIFIC_DNA_BINDING	187	0.382755	1.75165	4.75556e-05	0.0103289	0.00898955	BCL2/MBD4/MED1/YBX1/RBBP4/PGR/ERH/MAFG/NCL/LONP1/NANOG/HNRNPA1/ELK3/ARID3A/SUB1/XRCC6/ABL1/IFI16/ZNF329/HNRNPDL/KAT2B/NR1D1/HNRNPAB/HNRNPA2B1/HNRNPD/HNRNPK/LMNB1/CEBPA/IRF4/APEX1/STAT1/NR5A2/JUND/TBP/HSF1/BATF/RAD23B/GMEB2/FOXM1/PAX4/FOXO3/MUC1/TOX3/RUNX3/MNX1/MAX/ZNF175/IRF9/ZNF10/HMGA2/RPS3/HDAC2/BPTF/MAZ/TEAD4/SNAI2/PURB/TOP1/CREB3L2/CREBBP/PURA/IRF3/HSPD1/IRF6/AGO1/HMGB2/ELK1/TERF1/CEBPG/NR1D2
GO_REGULATION_OF_CELL_CYCLE_G1_S_PHASE_TRANSITION	52	0.463353	1.74945	0.00150649	0.0407445	0.0354613	BCL2/ARID3A/PSME2/ADAMTS1/PSME1/RBL2/PCNA/CHEK2/PTPN6/BID/APEX1/ID2/RDX/CDKN1A/CCL2/MUC1/SFN/CUL4B/ANXA1/CASP2/PTEN
GO_AZUROPHIL_GRANULE_LUMEN	54	0.459829	1.74897	0.00111241	0.035789	0.0311483	CTSG/MPO/SERPINA3/TXNDC5/PRTN3/ELANE/PRSS2/FTL/GRN/GNS/PRSS57/C3/IMPDH1/ANXA2/GM2A/GDI2/RNASE2/LYZ/ARSA/RETN/BPI/ARSB/HEXB/PRDX6/GLA/DEFA1/IST1/RNASET2/CCT8
GO_GLAND_MORPHOGENESIS	72	0.435633	1.7463	0.000942583	0.0318843	0.0277499	BCL2/TGFB1/MED1/TGFB3/PGR/CSF1/MDK/SEMA3A/HGF/FGF7/FGF8/AREG/TGFB2/BMP4/NTN1/PTN/EDAR/TNC/FGL1/NTN4/SFRP1
GO_INTRINSIC_APOPTOTIC_SIGNALING_PATHWAY	109	0.406479	1.73682	0.000307866	0.0199388	0.0173534	SOD1/BCL2/HSPA1A/TNFRSF1B/PTGS2/TNFRSF10B/HINT1/ABL1/IFI16/HTRA2/HNRNPK/MCL1/RPS7/CHEK2/BID/TPT1/LCK/PARK7/PTPN2/EDA2R/CDKN1A/TNFRSF1A/CXCL12/PLAUR/BAD/MUC1/MIF/SFN/RPS3/BRSK2/S100A9/CASP2/SNAI2/PIAS4/HMOX1/UBB
GO_GROWTH_FACTOR_ACTIVITY	127	0.397774	1.73624	0.000200813	0.0168724	0.0146846	IL11/GDF9/TGFB1/BDNF/FGF12/FGF5/TGFB3/IL4/CLEC11A/HDGF/BMP10/VEGFC/FGF4/FGF16/CSF1/MDK/HGF/FGF7/IL6/FGF8/GDF5/FGF22/NTF4/INHBB/AREG/TGFB2/GPI/CXCL1/BMP4/PTN/FGF20/GRN/GDF15/REG1A/TYMP/CXCL12/GDNF/GFER/JAG1/EFEMP1/FGF18/FGF6/JAG2/PDGFD/OGN/THPO/BMP6/VEGFA/GMFG
GO_RNA_SPLICING	93	0.415574	1.73566	0.000496109	0.0232713	0.0202538	CELF2/YBX1/SRSF6/NCL/PSIP1/RBM39/HNRNPA1/TAF15/PUF60/HSPA1A/HSPA8/TRA2B/SF1/SNRPG/SRSF7/HNRNPA2B1/HNRNPD/HNRNPK/PABPN1/HNRNPM/DDX39B/HNRNPF/SNRPA/RBFOX2/SAP18/RBM19/RBM17/POLR2J/SNRPB2/SNRPD2/THOC1/EIF4A3/ELAVL1/PPIE/NUP98/CIRBP/MAGOHB
GO_RIBONUCLEOPROTEIN_GRANULE	65	0.440516	1.73448	0.000927618	0.031825	0.0276984	PSMA6/CTSG/G3BP2/PSMA2/YBX1/G3BP1/NCL/PABPC3/SNRPG/STAU1/BLNK/EDC4/HNRNPK/PABPC4/INA/TNRC6B/RPS4X/SERPINB1/HSF1/SNRPB2/ELAVL1/AGO3/TOP1/CIRBP/AGO1/TSTD1/MAPT/DCP1B/FMR1/EIF2S1/HABP4/TIAL1/APOBEC3G
GO_MONONUCLEAR_CELL_MIGRATION	65	0.440042	1.73261	0.000927618	0.031825	0.0276984	CCL27/CSF1/MDK/CCL20/XCL1/IL6/CCL23/CXCL10/S100A12/MAPK14/CCL7/CCL13/PECAM1/PLG/CD47/CXCL12/CCL14/CCL2/HMGB1/GREM1/ANXA1/CCL24/CCL3/PDGFD/THBS1/NBL1/CCL15/LGMN/FLT1/CCL26/RARRES2
GO_PROTEIN_LOCALIZATION_TO_MITOCHONDRION	49	0.462899	1.72702	0.00202543	0.0461592	0.0401739	BCL2/HSP90AA1/DNAJC19/UBE2L3/YWHAQ/YWHAH/GRPEL1/HTRA2/PDCD5/BAG4/GZMB/BID/YWHAB/PPP3R1/BAD/SFN/HK2/CSNK2A2/AIP/HSPD1/YWHAG/YWHAZ/MAPT
GO_RESPONSE_TO_TEMPERATURE_STIMULUS	93	0.413001	1.72491	0.000574443	0.0240958	0.0209713	SOD1/HSP90AA1/HSP90AB1/PSIP1/HSPA1A/HSPA8/PTGS2/FGF16/CAMK2A/CD14/HTRA2/GLRX2/BAG4/CXCL10/FKBP4/HSPA1B/NTRK1/HSF1/CDKN1A/CAMK2B/CAMK2D/DNAJB6/CXCL12/HSPA5/HDAC2/NUP98/CIRBP/HSPH1/DNAJB1/THBS1/HSPA9/SEC13/CREBBP/HMOX1/HSPD1/MICB/MAPT/HSPA13/LRP11/EIF2S1/ACADVL/NFE2L1/DNAJA4
GO_VESICLE_LUMEN	224	0.369277	1.72152	4.64608e-05	0.0103289	0.00898955	CTSG/HSP90AA1/TGFB1/PSMA2/HSP90AB1/MPO/TGFB3/VEGFC/HSPA8/OLFM4/XRCC6/SERPINA3/FAM49B/VWF/ALDOA/ITIH4/PAFAH1B2/HGF/SRGN/LCN2/ITIH3/TXNDC5/B2M/PRTN3/ELANE/PYGL/TGFB2/S100A12/PTPN6/GPI/PTX3/CXCL1/POMC/MAPK14/CRISP3/PRSS2/PCYOX1L/CTSD/FTL/GHRL/PRDX4/SERPINB1/GRN/GNS/PRSS57/PSMD7/PLG/C3/VTI1B/IMPDH1/ANXA2/GSTP1/GM2A/CHI3L1/CAT/GDI2/RNASE2/LYZ/MIF/CAB39/HMGB1/OLA1/F5/SERPINA1/FGG/F8/COMMD9/S100A9/PPIE/…
GO_CHEMOKINE_RECEPTOR_BINDING	51	0.457416	1.71976	0.00190311	0.0450293	0.0391905	CCL27/CCL20/XCL1/CCL23/CXCL10/CXCL1/CCL7/CXCL11/CCL13/STAT1/CXCL14/CXCL13/CXCL8/CXCL16/CXCL12/CCL14/CCL2/CXCL5/CCL24/CCL3/CXCL9/CCL28/CCL15/CCL26
GO_APOPTOTIC_MITOCHONDRIAL_CHANGES	54	0.451153	1.71597	0.00177985	0.0438782	0.0381886	BCL2/FAM162A/HSPA1A/YWHAQ/YWHAH/CAMK2A/HGF/CHCHD10/PDCD5/GZMB/BID/TNFSF10/YWHAB/PLAUR/PPP3R1/BAD/SFN/HK2/PSMD10/HSPD1/YWHAG/YWHAZ/GCLM/IFIT2
GO_CELLULAR_RESPONSE_TO_DRUG	159	0.382086	1.71578	0.000194496	0.0166821	0.0145189	VIM/SOD1/HSP90AB1/HNRNPA1/PTGS2/ABL1/AGRN/HGF/IL6/LCN2/CCNA2/HNRNPD/EDN1/PCNA/B2M/CHEK2/ADAM15/HSP90B1/ALK/GNAS/APEX1/CRKL/NTRK1/PARK7/RHOB/CRK/HSF1/IL1B/PDXP/SFRP1/MAP1LC3A/QDPR/BAD/MAP4K1/HSPA5/FLNA/NET1/ANXA1/FOLR2/IL18RAP/HMGA2/RPS3/HDAC2/PTEN/PDGFD/CBX3/HMOX1
GO_DNA_REPAIR	120	0.395146	1.71193	0.000252736	0.0185102	0.01611	ASF1A/MBD4/RPS27A/XRCC4/UBQLN4/XRCC6/ABL1/SSRP1/ISG15/SMC3/PCNA/RECQL/CHEK2/MPG/KIF22/APEX1/PARK7/RNF8/ADPRHL2/HSF1/RAD23A/RAD23B/FOXM1/RBM17/NUDT16L1/SETMAR/POLR2J/FH/CHEK1/HMGB1/CUL4B/HMGA2/RPS3/PPIE/PIAS4/TDP1/UBB/CCNH/UBC/UBE2V1/NUDT1/UBE2T/POLM/HMGB2/CEBPG
GO_CYTOKINE_ACTIVITY	176	0.375595	1.70729	0.000119706	0.0123373	0.0107375	IL11/GDF9/TGFB1/CCL27/TGFB3/IL4/TSLP/BMP10/IL17D/CSF1/IFNL1/CCL20/IL24/XCL1/IL18/IL6/IFNL2/IL1RN/GDF5/EDN1/SPP1/CCL23/INHBB/AREG/CXCL10/TGFB2/GPI/IL36B/CXCL1/BMP4/TNFSF10/CCL7/CXCL11/CCL13/TNFSF15/CXCL14/GRN/CXCL13/GDF15/CXCL8/IL1B/CXCL16/CXCL12/CCL14/CCL2/CD40LG/IL22/MIF/CXCL5/HMGB1/GREM1/IL15/CCL24/CCL3/IL20/THPO/BMP6/VEGFA/CXCL9/NAMPT/IFNA6/CCL28/CCL15/IL1F10/SECTM1/CCL26
GO_REGULATION_OF_MYELOID_CELL_DIFFERENTIATION	107	0.40047	1.70642	0.000514377	0.0232713	0.0202538	TGFB1/MED1/IL4/CD4/HSPA1A/CSF1/DPY30/WDR5/KAT2B/ISG15/HSPA1B/TNRC6B/DLL1/GNAS/MAPK14/FSTL3/ID2/RBBP5/ASH2L/STAT1/RBFOX2/PTPN2/TESC/SFRP1/RNF41/FOXO3/JAG1/CCL3/IL23R/PURB/AGO3/IL20/THBS1/THPO/HSPA9/CREBBP/PRKCQ/AGO1/CSF3R/ROR2/HMGB2
GO_RNA_CATABOLIC_PROCESS	107	0.399636	1.70287	0.000514377	0.0232713	0.0202538	VIM/PSMA6/PSMA2/RPS27A/RPL12/YBX1/PSMA1/TAF15/HSPA1A/TNFRSF1B/HSPA8/PSME2/PSME1/HNRNPD/EDC4/RPL30/PABPC4/RPS7/HNRNPM/HSPA1B/TNRC6B/VIP/MAPK14/PSMB4/APEX1/RPS4X/PSMD7/YWHAB/RNASE6/SSB/GDNF/RNASE2/PSMA7/EIF4A3/RPS3/PSMD10/ELAVL1/AGO3/CIRBP/RPS5/EXOSC8/MAGOHB/UBB/UBC/AGO1/PSMD11/YWHAZ/PSME3/DCP1B/FMR1/RPS19/PSMB1/RPS3A
GO_NEGATIVE_REGULATION_OF_CELL_CYCLE_PROCESS	105	0.40033	1.70126	0.000438201	0.022439	0.0195294	PSMA6/BCL2/PSMA2/HSP90AB1/RBBP4/PSMA1/ARID3A/PSME2/KAT2B/HLA-G/PSME1/RBL2/PCNA/CHEK2/LCMT1/BMP4/PSMB4/CALR/TNKS/PSMD7/CDKN1A/SKP1/SETMAR/CCL2/L3MBTL2/CHEK1/MUC1/MIF/SFN/MAX/PSMA7/NAA10/HMGA2/PSMD10/CASP2/MDM1/PTEN/CBX3
GO_NUCLEOLUS	175	0.3741	1.69927	0.000119867	0.0123373	0.0107375	MED1/NOP16/RPS27A/RPL12/ILF3/NCL/NANOG/HSPA8/SUB1/XRCC6/ABL1/IFI16/SSRP1/EWSR1/PAFAH1B2/TXNRD1/RBL2/RPS7/FGF22/HNRNPM/CEBPA/CAPG/PTPN6/APEX1/PES1/RBBP5/STAT1/SBDS/CDKN1A/TAX1BP3/RBM19/SDCBP2/CETN3/SETMAR/KIAA0319L/USO1/CA9/EZR/SNRPB2/RUNX3/MNX1/OLA1/FLNA/CTSB/REXO2/NAA10/EIF4A3/FGF18/RPS3/NCF2/PIN4/SPRN/UBLCP1/CMPK1/TOP1/DNAJB1/HSPA9/ACAT2/EXOSC8/HMOX1/UBE2T/EDF1/CUTC/HMGB2/TERF1/VRK1/ANP32B/RAN/…
GO_REGULATION_OF_LYMPHOCYTE_MEDIATED_IMMUNITY	82	0.413841	1.69513	0.00137938	0.039437	0.0343233	PRKCZ/TGFB1/IL4/TNFRSF1B/FAM49B/SH2D1A/XCL1/HLA-G/IL18/HAVCR2/IL7R/IL6/B2M/PTPN6/CD226/CRK/IL1B/C3/CLEC4G/IL18R1/IL12RB1/STX7/THOC1/KIR2DL4/LAG3/HMGB1/LGALS9/IL18RAP/IL23R/HSPD1/SLAMF6/MICB/VAV1
GO_PROTEIN_TARGETING	117	0.389283	1.68059	0.000456957	0.022439	0.0195294	HSP90AA1/DNAJC19/RPS27A/GABARAP/RPL12/NUCB1/UBE2L3/HSPA8/YWHAQ/GRPEL1/HTRA2/RPL30/RPS7/PDCD5/SCARB2/BAG4/BID/PRKCI/CDC37/RPS4X/SYNJ2BP/YWHAB/VTI1B/ARL6/RTP4/CAT/CHP1/SMURF1/HSPA5/CSNK2A2/AIP/RPS3/DECR2/STOM/GOLGA7/RPS5/NCF1/SRP14/UBB/ACAA1/UBC/HSPD1/YWHAG/YWHAZ/PRNP/AP4M1/GDI1/RPS19/RPS3A/UBE2D3/IDE/ERBB2/VTI1A/GSK3A/RPLP2/HRAS/PECR/PEX14/ECH1/SRP19
GO_RESPONSE_TO_INTERLEUKIN_1	106	0.394343	1.67753	0.000721798	0.0277724	0.0241712	PSMA6/PSMA2/RPS27A/PSMA1/PSME2/CCL20/NR1D1/XCL1/PSME1/IL6/LCN2/IL1RN/EDN1/CCL23/PSMB4/CCL7/CCL13/PRKCI/PSMD7/CD47/CXCL8/SKP1/IL1B/GBP1/SFRP1/CHI3L1/CCL14/CCL2/LGALS9/PSMA7/IL1RL2/ANXA1/FGG/PSMD10/CCL24/CCL3/GBP2/UBB/UBC/CCL15/UBE2V1/CCL26/APP/PSMD11/IGBP1/PSME3/MAP3K3/TFPI/PSMB1/CCL21/MAPK13
GO_RNA_PROCESSING	152	0.374473	1.67248	0.000391533	0.021783	0.0189584	CELF2/TGFB1/YBX1/SRSF6/SEPHS1/NCL/PSIP1/RBM39/HNRNPA1/TAF15/PUF60/HSPA1A/HSPA8/TRA2B/SF1/SNRPG/RBM23/SRSF7/HNRNPA2B1/HNRNPD/HNRNPK/PABPC4/RPS7/PABPN1/RPRD1B/HNRNPM/RNGTT/DDX39B/BMP4/HNRNPF/SNRPA/PES1/RBFOX2/SAP18/HSF1/SBDS/TARBP2/RBM19/RBM17/SSB/POLR2J/SNRPB2/SNRPD2/THOC1/EIF4A3/ELAVL1/PPIE/NUP98/AGO3/CIRBP/EXOSC8/MAGOHB
GO_RESPONSE_TO_FIBROBLAST_GROWTH_FACTOR	83	0.407168	1.67094	0.0015649	0.0411852	0.0358448	FGF12/FGF5/FGF4/HNRNPA1/FGF16/FGF7/FGF8/FGF22/FLRT1/HNRNPM/FGFR3/FGFBP3/HNRNPF/CRKL/FGFRL1/RBFOX2/FGF20/FGFBP1/FGFR4/TNC/CXCL13/CXCL8/SFRP1/POLR2J/CCL2/FGF18/SPRED1/GALNT3/FGF6/THBS1/PTPN11/APLN/ELK1/RAB14/GCLM/DLL4/FGF3/STAR/TIAL1/CBL/GRB2
GO_AZUROPHIL_GRANULE	81	0.407916	1.66744	0.00188589	0.0448798	0.0390604	CTSG/MPO/SERPINA3/B4GALT1/TXNDC5/PRTN3/ELANE/STX3/PRSS2/FTL/GRN/GNS/PRSS57/C3/IMPDH1/ANXA2/GM2A/GDI2/PIGR/STX7/RNASE2/LYZ/STOM/ACPP/ARSA/RETN/BPI/VAPA/ARSB/HEXB/PRDX6/CEACAM8/GLA/DEFA1/IST1/RNASET2/DDOST/CCT8
GO_REGULATION_OF_AUTOPHAGY	93	0.39904	1.66661	0.00125333	0.037991	0.0330648	BCL2/DCN/IL4/TBK1/UBQLN4/ABL2/SPTLC2/CAPNS1/ABL1/IFI16/UBQLN2/PAFAH1B2/HGF/HTRA2/MCL1/VPS26A/PARK7/CDC37/GAPDH/RNF41/FOXO3/BAD/SMURF1/HMGB1/HK2/CSNK2A2/UCHL1/NAMPT/HMOX1/RAB39B
GO_MACROAUTOPHAGY	82	0.406853	1.66651	0.00185686	0.0448798	0.0390604	DCN/IL4/GABARAP/GABARAPL1/TBK1/UBQLN4/SPTLC2/CAPNS1/UBQLN2/PAFAH1B2/HTRA2/VPS26A/DYNLL2/CDC37/STX12/CSNK2A1/VPS25/GAPDH/MAP1LC3A/RNF41/GABARAPL2/SMURF1/CSNK2A2/UCHL1
GO_NIK_NF_KAPPAB_SIGNALING	79	0.409471	1.66608	0.00213459	0.0475032	0.0413436	PSMA6/PSMA2/PSMA1/TNFRSF10B/PSME2/CD14/IL18/HAVCR2/PSME1/EDN1/ALK/PSMB4/CALR/EDAR/TNFSF15/PSMD7/SKP1/IL1B/CHI3L1/IL18R1/HMGB1/LGALS9/PSMA7/GREM1/TNFRSF10A/RPS3/PSMD10/AGO3/AGO1/APP/PSMD11/PSME3/MMP8/RHOA/PSMB1
GO_MYELOID_LEUKOCYTE_ACTIVATION	361	0.3421	1.66021	4.38356e-05	0.0103289	0.00898955	HMOX2/CTSG/HSP90AA1/PSMA2/HSP90AB1/MPO/IL4/TSLP/FCAR/HSPA1A/TNFRSF1B/HSPA8/OLFM4/CSF1/XRCC6/SERPINA3/LBP/NR1D1/ALDOA/B4GALT1/CD14/PLA2G10/IL18/PAFAH1B2/HAVCR2/IL1RL1/IL6/LCN2/TXNDC5/KCNAB2/B2M/PRTN3/CEBPA/ELANE/PYGL/S100A12/PTPN6/HSPA1B/GPI/PTX3/CXCL1/CD226/NPPA/IRF4/MAPK14/CRISP3/CD200/PRSS2/CST3/CST7/CTSD/FTL/PECAM1/FCGR3B/PRDX4/SERPINB1/GRN/GNS/PSMD7/LTA4H/ASAH1/CD47/BATF/CXCL8/AP2A2/PRSS3/C3/…
GO_REGULATION_OF_APOPTOTIC_SIGNALING_PATHWAY	175	0.364442	1.65539	0.000239733	0.0179451	0.0156182	SOD1/BCL2/FAM162A/BDNF/HSPA1A/YWHAQ/PTGS2/TNFRSF10B/YWHAH/HGF/CHCHD10/HTRA2/HNRNPK/MCL1/RPS7/PDCD5/SGK3/INHBB/GZMB/HSPA1B/BID/BMP4/TNFSF10/TPT1/LCK/PARK7/PTPN2/CSNK2A1/IL1B/YWHAB/SFRP1/GSTP1/CXCL12/PLAUR/PPP3R1/GDNF/BAD/MUC1/MIF/SFN/LGALS9/STX4/FGG/TNFRSF10A/CSNK2A2/RPS3/PSMD10/MAZ/S100A9/CASP2/SNAI2/PTEN/THBS1/PIAS4/HMOX1/UBB/PEA15/HMGB2/YWHAG/TXNDC12/YWHAZ/PSME3/GCLM
GO_NUCLEAR_TRANSPORT	104	0.389386	1.65213	0.00116267	0.0371063	0.0322948	TGFB1/MED1/SRSF6/PSIP1/HNRNPA1/NXT1/PTGS2/SNRPG/SRSF7/HNRNPA2B1/RANBP3/PABPN1/DDX39B/BMP4/MAPK14/CALR/PARK7/CDKN1A/IL1B/SSB/CHP1/SNRPD2/THOC1/SMURF1/SFN/FLNA/NXF1/EIF4A3/SPRN/NUP98/MBTPS1/HSPA9/APOD/SEC13/MAGOHB/PTPN11
GO_CELL_CHEMOTAXIS	174	0.362851	1.64765	0.000263681	0.0185102	0.01611	CCL27/JAM3/VEGFC/FGF4/FGF16/CSF1/MDK/CCL20/LBP/XCL1/HGF/IL6/IL1RN/EDN1/SAA1/CCL23/CXCL10/TGFB2/S100A12/IL36B/CXCL1/MAPK14/CALR/PTN/SAA2/CCL7/CXCL11/CRKL/CCL13/CXCL14/CRK/CXCL13/SBDS/CXCL8/IL1B/CXCL16/GSTP1/CXCL12/CCL14/CCL2/MIF/CXCL5/HMGB1/LGALS9/GREM1/ANXA1/PARVA/FGF18/CCL24/CCL3/S100A9/PDGFD/THBS1/VEGFA/CXCL9/SWAP70/PRKCQ/CCL28/NBL1/CCL15/LGMN/FLT1/IL1F10/EPHA2/CCL26/CSF3R/RARRES2/HMGB2/VAV1
GO_MYELOID_LEUKOCYTE_MEDIATED_IMMUNITY	298	0.343742	1.6446	4.47878e-05	0.0103289	0.00898955	HMOX2/CTSG/HSP90AA1/PSMA2/HSP90AB1/MPO/FCAR/HSPA1A/TNFRSF1B/HSPA8/OLFM4/XRCC6/SERPINA3/ALDOA/B4GALT1/CD14/PAFAH1B2/IL6/LCN2/TXNDC5/KCNAB2/B2M/PRTN3/ELANE/PYGL/S100A12/PTPN6/HSPA1B/GPI/PTX3/CXCL1/NPPA/MAPK14/CRISP3/PRSS2/CST3/CTSD/FTL/PECAM1/FCGR3B/PRDX4/SERPINB1/GRN/GNS/PSMD7/LTA4H/ASAH1/CD47/AP2A2/PRSS3/C3/ANPEP/IMPDH1/ANXA2/GSTP1/PLAUR/GM2A/CHI3L1/CAT/LILRB2/GDI2/KRT1/PIGR/RNASE2/LYZ/MIF/CAB39/…
GO_PROCESS_UTILIZING_AUTOPHAGIC_MECHANISM	141	0.371749	1.64433	0.000544973	0.0240958	0.0209713	BCL2/DCN/HSP90AA1/IL4/GABARAP/GABARAPL1/TBK1/HSPA8/UBQLN4/ABL2/SPTLC2/CAPNS1/ABL1/IFI16/UBQLN2/PAFAH1B2/HGF/HTRA2/MCL1/VPS26A/DYNLL2/PARK7/CDC37/STX12/CSNK2A1/VPS25/GAPDH/MAP1LC3A/RNF41/FOXO3/BAD/GABARAPL2/SMURF1/HMGB1/HK2/CSNK2A2/UCHL1/S100A9/NAMPT/HMOX1/RAB39B/CHMP2A/ARSB/EIF4G2/SNX5/MAPT/NSFL1C/UBXN2B/CLTC/MAP1LC3B/RAB1B/STAT3/SYT11
GO_LEUKOCYTE_MEDIATED_IMMUNITY	419	0.334995	1.64305	2.15475e-05	0.00956436	0.00832418	PRKCZ/HMOX2/CTSG/HSP90AA1/TGFB1/PSMA2/HSP90AB1/MPO/IL4/ULBP3/FCAR/HSPA1A/TNFRSF1B/HSPA8/OLFM4/XRCC6/SERPINA3/FAM49B/SH2D1A/ALDOA/XCL1/B4GALT1/CD14/HLA-G/IL18/PAFAH1B2/HAVCR2/IL7R/IL6/LCN2/TXNDC5/KCNAB2/B2M/PRTN3/ULBP1/ELANE/PYGL/GZMB/S100A12/PTPN6/HSPA1B/GPI/PTX3/CXCL1/CD226/NPPA/MAPK14/CRISP3/PRSS2/CST3/C9/RNF8/CTSD/HPRT1/FTL/PECAM1/FCGR3B/PRDX4/SERPINB1/GRN/GNS/CRK/PSMD7/LTA4H/ASAH1/CD47/BATF/A…
GO_CELL_SUBSTRATE_JUNCTION	187	0.35899	1.64289	0.000237778	0.0179451	0.0156182	VIM/RPL12/BSG/G3BP1/HSPA1A/HSPA8/YWHAQ/SCARF2/IL1RL1/HNRNPK/RPL30/LAP3/RPS7/FLRT1/SCARB2/GJA1/B2M/RALA/LAYN/FGFR3/HSP90B1/HSPA1B/CALR/FLII/KIF23/RHOB/RDX/RPS4X/MPZL1/TNC/YWHAB/YES1/AIF1L/PLAUR/EZR/CAT/CHP1/SYNE2/GDI2/HSPG2/HSPA5/FLNA/TNS2/TWF1/ANXA1/NEDD9/PARVA/REXO2/RPS3/ARPC1B/PPIB/RPS5/HSPA9/ACTN2/DAG1/FLT1/EPHA2/TGM2/PPIA/YWHAG/YWHAZ/TNS4/CAV3/ENAH/PDCD6IP/ITGB7/RHOA/RPS19/CLTC/CAPN2/RPS3A/MA…
GO_MITOCHONDRION_ORGANIZATION	145	0.369578	1.6404	0.000616857	0.0251446	0.0218841	BCL2/DCN/HSP90AA1/FAM162A/DNAJC19/GABARAP/GABARAPL1/UBE2L3/LONP1/HSPA1A/YWHAQ/NDUFV2/YWHAH/CAMK2A/DNAJC11/HGF/GRPEL1/CHCHD10/HTRA2/PDCD5/BAG4/CEBPA/GZMB/BID/TNFSF10/PARK7/CDC37/SYNJ2BP/MX1/YWHAB/TYMP/MAP1LC3A/RNF41/PLAUR/PPP3R1/BAD/GABARAPL2/PRDX3/SMURF1/SFN/NDUFB8/CNP/HK2/CSNK2A2/AIP/PSMD10
GO_APOPTOTIC_SIGNALING_PATHWAY	255	0.347431	1.63934	6.8537e-05	0.0117569	0.0102324	SOD1/BCL2/FAM162A/TGFB1/BDNF/GABARAP/HSPA1A/GZMH/TNFRSF1B/YWHAQ/PTGS2/TNFRSF10B/HINT1/ABL1/IFI16/YWHAH/CD14/HGF/SRGN/LCN2/CHCHD10/HTRA2/HNRNPK/MCL1/RPS7/PDCD5/CHEK2/SGK3/FGFR3/INHBB/GZMB/TGFB2/HSPA1B/BID/BMP4/TNFSF10/TPT1/LCK/PARK7/PTPN2/DIDO1/EDA2R/CSNK2A1/CDKN1A/IL1B/YWHAB/SFRP1/TNFRSF1A/GSTP1/RNF41/CXCL12/PLAUR/PPP3R1/GDNF/BAD/MUC1/MIF/SFN/LGALS9/STX4/FGG/TNFRSF10A/CSNK2A2/RPS3/PSMD10/BRSK2/MA…
GO_CELLULAR_RESPONSE_TO_EXTERNAL_STIMULUS	140	0.370902	1.63908	0.000570267	0.0240958	0.0209713	SOD1/BCL2/MED1/GABARAP/GABARAPL1/TNFRSF8/UPP1/HNRNPA1/HSPA8/PTGS2/TNFRSF10B/IFI16/GLUL/LCN2/GLRX2/GJA1/INHBB/HSP90B1/NPPA/PTN/TNKS/TNC/HSF1/CDKN1A/IL1B/PDXP/SFRP1/MAP1LC3A/TNFRSF1A/GSTP1/ASGR1/BAD/GABARAPL2/CHEK1/HSPA5/MAX/IL15/TNFRSF10A/FOLR2/DCTPP1/CASP2/SNAI2/BMP6/PTPN11/NAMPT/HMOX1/DAG1/NUDT1
GO_DOUBLE_STRANDED_DNA_BINDING	170	0.361455	1.63572	0.000313261	0.0199388	0.0173534	MBD4/MED1/YBX1/RBBP4/PGR/MAFG/PSIP1/NANOG/ELK3/ARID3A/SUB1/XRCC6/ABL1/IFI16/HNRNPDL/KAT2B/NR1D1/HNRNPAB/HNRNPD/HNRNPK/LMNB1/PCNA/CEBPA/IRF4/APEX1/STAT1/NR5A2/JUND/TBP/HSF1/BATF/RAD23B/GMEB2/FOXM1/SETMAR/FOXO3/MUC1/TOX3/RUNX3/HMGB1/MAX/ZNF175/DDX58/IRF9/HMGA2/RPS3/HDAC2/MAZ/SNAI2/PURB/TOP1/CREB3L2/TDP1/CREBBP/PURA/IRF3/HSPD1/AGO1/HMGB2/ELK1/TERF1/CEBPG/NR1D2
GO_CELLULAR_RESPONSE_TO_EXTRACELLULAR_STIMULUS	98	0.386939	1.62825	0.00202935	0.0461592	0.0401739	SOD1/BCL2/MED1/GABARAP/GABARAPL1/UPP1/HNRNPA1/HSPA8/PTGS2/IFI16/GLUL/LCN2/GLRX2/INHBB/HSP90B1/PTN/TNKS/TNC/HSF1/CDKN1A/PDXP/SFRP1/MAP1LC3A/GSTP1/ASGR1/GABARAPL2/HSPA5/MAX/IL15/FOLR2/DCTPP1/SNAI2/NAMPT/HMOX1
GO_RESPONSE_TO_TUMOR_NECROSIS_FACTOR	166	0.360633	1.6274	0.00055577	0.0240958	0.0209713	PSMA6/PSMA2/TNFRSF8/PSMA1/HSPA1A/TNFRSF1B/PTGS2/PSME2/CCL20/NR1D1/XCL1/CD14/PSME1/LCN2/TNFRSF6B/EDN1/TNFRSF13B/CCL23/BAG4/CEBPA/HSPA1B/MAPK14/PSMB4/CCL7/CCL13/EDAR/STAT1/PTPN2/TNFSF15/GSS/HAMP/EDA2R/PSMD7/ASAH1/CXCL8/CXCL16/GBP1/SFRP1/TNFRSF1A/GSTP1/CHI3L1/CCL14/FOXO3/CCL2/CD40LG/TAX1BP1/PSMA7/RPS3/PSMD10/CCL24/CCL3/COMMD7/GBP2/THBS1/PIAS4/CCL15/CCL26/PLVAP/GCH1/PSMD11
GO_SEQUENCE_SPECIFIC_DOUBLE_STRANDED_DNA_BINDING	146	0.362545	1.61091	0.00098464	0.0329574	0.0286839	MBD4/MED1/YBX1/RBBP4/PGR/MAFG/NANOG/ELK3/ARID3A/SUB1/ABL1/IFI16/HNRNPDL/KAT2B/NR1D1/HNRNPAB/HNRNPD/HNRNPK/LMNB1/CEBPA/IRF4/STAT1/NR5A2/JUND/TBP/HSF1/BATF/RAD23B/GMEB2/FOXM1/FOXO3/MUC1/TOX3/RUNX3/MAX/ZNF175/IRF9/HMGA2/RPS3/HDAC2/MAZ/SNAI2/PURB/TOP1/CREB3L2/CREBBP/PURA/IRF3/HSPD1/AGO1/HMGB2/ELK1/CEBPG/NR1D2
GO_CELL_ACTIVATION_INVOLVED_IN_IMMUNE_RESPONSE	377	0.32947	1.60396	6.54679e-05	0.0117188	0.0101992	PRKCZ/HMOX2/CTSG/HSP90AA1/TGFB1/PSMA2/HSP90AB1/MPO/IL4/FCAR/HSPA1A/TNFRSF1B/HSPA8/OLFM4/XRCC6/SERPINA3/ABL1/IFNL1/MDK/LBP/ALDOA/B4GALT1/CD14/IL18/PAFAH1B2/HAVCR2/IL6/LCN2/TXNDC5/KCNAB2/B2M/PRTN3/ELANE/PYGL/S100A12/PTPN6/HSPA1B/GPI/PTX3/CXCL1/DLL1/NPPA/IRF4/MAPK14/CRISP3/PRSS2/CST3/RNF8/CTSD/FTL/PECAM1/FCGR3B/PRDX4/SERPINB1/GRN/GNS/PSMD7/LTA4H/ASAH1/CD47/BATF/AP2A2/PRSS3/C3/ANPEP/IMPDH1/ANXA2/GSTP…
GO_REGULATION_OF_HEMOPOIESIS	209	0.345927	1.60208	0.000327424	0.0202234	0.017601	PSMA6/SOD1/PRKCZ/TGFB1/PSMA2/MED1/IL4/CD4/PSMA1/IL17D/HSPA1A/CSF1/PSME2/ABL1/IFNL1/MDK/DPY30/WDR5/KAT2B/ISG15/HLA-G/IL18/IL7R/PSME1/PTPN6/HSPA1B/TNRC6B/BMP4/DLL1/IRF4/GNAS/MAPK14/PSMB4/FSTL3/PTN/ID2/RBBP5/ASH2L/STAT1/RBFOX2/PTPN2/PSMD7/TESC/SFRP1/RNF41/FOXO3/BAD/LILRB2/IL12RB1/LAG3/RUNX3/HMGB1/LGALS9/JAG1/PSMA7/IL1RL2/ANXA1/IL15/PSMD10/CCL3/IL23R/PURB/AGO3/IL20/THBS1/THPO/HSPA9/CREBBP/PRKCQ
GO_NEGATIVE_REGULATION_OF_CELL_CYCLE	192	0.348626	1.59984	0.000450322	0.022439	0.0195294	PSMA6/BCL2/TGFB1/PSMA2/HSP90AB1/RBBP4/CGREF1/APBB2/PSMA1/ARID3A/PTGS2/PSME2/ABL1/KAT2B/MAPK12/HLA-G/PSME1/RBL2/HTRA2/PCNA/CHEK2/LCMT1/CEBPA/TGFB2/DDX39B/BMP4/MAPK14/PSMB4/CALR/ID2/TNKS/RHOB/PSMD7/CDKN1A/CXCL8/SKP1/FOXM1/SETMAR/CCL2/L3MBTL2/CHEK1/MUC1/THOC1/MIF/CAB39/SFN/RUNX3/MAX/PSMA7/MAGI2/NAA10/HMGA2/PSMD10/CASP2/MDM1/PTEN/THBS1/CBX3/PTPN11/HEXIM1/IRF6/CHMP2A/PEA15/PSMD11/TERF1
GO_REGULATION_OF_CYSTEINE_TYPE_ENDOPEPTIDASE_ACTIVITY	119	0.369105	1.59685	0.0016725	0.0425656	0.0370462	CLEC7A/FAM162A/PTGS2/TNFRSF10B/IFI16/HGF/HTRA2/PDCD5/BID/TNFSF10/LCK/PARK7/CST7/TNFSF15/CTSD/HSF1/CSNK2A1/HSPE1/DNAJB6/PLAUR/F3/POR/BAD/PRDX3/SFN/HMGB1/LGALS9/TNFRSF10A/RPS3/S100A9/BIRC7/THBS1/VEGFA/LGMN/HSPD1/CASP10/IGBP1/MAPT/ANP32B/RHOA
GO_LEUKOCYTE_CHEMOTAXIS	136	0.36063	1.5882	0.00156865	0.0411852	0.0358448	CCL27/JAM3/VEGFC/CSF1/MDK/CCL20/LBP/XCL1/IL6/IL1RN/EDN1/SAA1/CCL23/CXCL10/TGFB2/S100A12/IL36B/CXCL1/MAPK14/CALR/PTN/CCL7/CXCL11/CCL13/CXCL14/CXCL13/SBDS/CXCL8/IL1B/CXCL16/CXCL12/CCL14/CCL2/MIF/CXCL5/HMGB1/LGALS9/GREM1/ANXA1/CCL24/CCL3/S100A9/THBS1/VEGFA/CXCL9/SWAP70/NBL1/CCL15/LGMN/FLT1/IL1F10/CCL26/CSF3R/RARRES2/VAV1/DDT/C5
GO_REGULATION_OF_CELL_CYCLE_PROCESS	211	0.339009	1.57067	0.000585274	0.0240958	0.0209713	PSMA6/BCL2/HSP90AA1/ANAPC10/PSMA2/MED1/HSP90AB1/RBBP4/PSMA1/UBE2E1/BRD4/ARID3A/HSPA1A/PSME2/ADAMTS1/KAT2B/HLA-G/PSME1/RBL2/FGF8/EDN1/SMC3/PCNA/CHEK2/RPRD1B/LCMT1/PTPN6/HSPA1B/BID/BMP4/PSMB4/CALR/APEX1/ID2/TNKS/KIF23/RDX/PSMD7/CSNK2A1/CDKN1A/SKP1/IL1B/PDXP/SFRP1/FOXM1/SETMAR/PRC1/CCL2/L3MBTL2/CHEK1/MUC1/MIF/SFN/MAX/PSMA7/CUL4B/ANXA1/NAA10/CSNK2A2/HMGA2/PSMD10/CASP2/MDM1/PTEN
GO_AMIDE_BIOSYNTHETIC_PROCESS	195	0.341315	1.56919	0.000803042	0.0294762	0.0256541	VIM/RPS27A/RPL12/ILF3/NCL/SPTLC2/EIF3G/FURIN/B4GALT3/RRBP1/IL6/HNRNPD/RPL30/PPT1/PABPC4/RPS7/CEBPA/ELANE/EIF1AX/BDH2/TNRC6B/DDX39B/MRPL34/MRPL52/CALR/B3GALT1/GSS/RPS4X/YBX2/MAPKAPK5/ASAH1/ASL/EIF4EBP2/EIF1AD/TARBP2/GAPDH/TNFRSF1A/FOXO3/EIF5/DENR/EIF4E2/EIF4A3/RPS3/PDHX/ELAVL1/PPA1/EEF1B2/AGO3/CIRBP/RPS5/THBS1/GCDH/PURA/EIF4A1/EIF5A/DHFR/AGO1/APP/GCH1/EIF4G2/GCLM/SARS2/CNDP2/MRPL33/RHOA/EIF5A2/FMR…
GO_CELLULAR_RESPONSE_TO_LIPID	238	0.331489	1.55407	0.000668526	0.0264646	0.023033	VIM/CTSG/TGFB1/MED1/PGR/UBE2L3/TNFRSF1B/ABL2/ABL1/IL24/LBP/NR1D1/STC1/YWHAH/CD14/IL18/HAVCR2/IL6/GRAMD1C/LCN2/CCNA2/HTRA2/IL1RN/HNRNPD/EDN1/SPP1/PABPN1/CXCL10/ADAM15/FKBP4/IL36B/CXCL1/BMP4/MAPK14/CALR/PTN/CXCL11/PARK7/RBFOX2/NR5A2/HAMP/TNC/CXCL13/HSF1/LRP8/TESC/CXCL8/IL1B/SFRP1/YES1/GSTP1/MRC1/CCL2/BAD/LILRB2/MAP4K1/MIF/CXCL5/HMGB1/ANXA1/IL15/HDAC2/CCL3/SNAI2/BMP6/CBX3/CXCL9/DAG1/IRF3/IL1F10/BPI/…
GO_ESTABLISHMENT_OF_PROTEIN_LOCALIZATION_TO_ORGANELLE	170	0.343304	1.55358	0.0015904	0.0411852	0.0358448	BCL2/HSP90AA1/TGFB1/DNAJC19/MED1/RPS27A/RPL12/UBE2L3/NXT1/HSPA8/YWHAQ/PTGS2/YWHAH/GRPEL1/HTRA2/RPL30/RPS7/PDCD5/SCARB2/BAG4/GZMB/BID/BMP4/MAPK14/RPS4X/MX1/CDKN1A/VPS25/YWHAB/VTI1B/PPP3R1/CAT/CHP1/BAD/ATAD1/SMURF1/HSPA5/SFN/FLNA/HK2/CSNK2A2/AIP/RPS3/DECR2/SPRN/NUP98/MBTPS1/RPS5/APOD/SRP14/UBB/ACAA1/UBC/HSPD1/YWHAG/TERF1/YWHAZ/MAPT/RAN/AP4M1/RPS19/RPS3A/STAT3/TCP1/UBE2D3/SNAP25/SNUPN/IDE/VTI1A/CCT8…
GO_POSITIVE_REGULATION_OF_RNA_METABOLIC_PROCESS	440	0.315692	1.5529	4.29516e-05	0.0103289	0.00898955	DCN/IL11/TGFB1/ASF1A/MED1/RPS27A/TGFB3/IL4/CD4/TBK1/YBX1/PGR/YEATS4/UBE2L3/BMP10/ILF3/MAFG/NCL/FGF4/NANOG/SHC1/ELK3/BRD4/ARID3A/TAF15/HSPA1A/TNFRSF1B/TRA2B/SUB1/XRCC6/ABL1/IFI16/IFNL1/MDK/WDR5/KAT2B/NR1D1/YWHAH/AGRN/IL18/HNRNPAB/HGF/FGF7/IL6/CCNA2/CHCHD10/HNRNPD/EDN1/SRA1/HNRNPK/ING1/SUMO2/SPP1/CHEK2/RPRD1B/CEBPA/CXCL10/TGFB2/TNRC6B/DDX39B/BMP4/DLL1/POMC/IRF4/MAPK14/FSTL3/APEX1/ID2/TNKS/PARK7/ASH…
GO_REGULATION_OF_CELLULAR_CATABOLIC_PROCESS	278	0.326588	1.55257	0.000361893	0.0206269	0.0179522	VIM/PSMA6/BCL2/DCN/HSP90AA1/PSMA2/HSP90AB1/RPS27A/IL4/TBK1/YBX1/PSMA1/TAF15/HSPA1A/TNFRSF1B/HSPA8/UBQLN4/ABL2/SPTLC2/CAPNS1/PSME2/ABL1/IFI16/FURIN/UBQLN2/PAFAH1B2/HGF/PSME1/IL6/DNAJB2/HTRA2/HNRNPD/MCL1/PABPC4/RPS7/SUMO2/SCARB2/VPS26A/HNRNPM/CEBPA/HSPA1B/TNRC6B/VIP/MAPK14/PSMB4/APEX1/CST3/PARK7/CDC37/RDX/PSMD7/HSF1/CSNK2A1/RAD23A/RAD23B/ERLEC1/IL1B/YWHAB/GAPDH/ANXA2/RNF41/FOXO3/EZR/GDNF/BAD/GABARA…
GO_TRANSCRIPTION_FACTOR_BINDING	172	0.339357	1.53827	0.00221266	0.0484658	0.0421814	PSMA6/BCL2/MED1/GABARAPL1/HDGF/APBB2/BRD4/IFI16/KAT2B/NR1D1/YWHAH/RBL2/HNRNPD/SUMO2/PCNA/CEBPA/FKBP4/DLL1/IRF4/MAPK14/HNRNPF/CALR/APEX1/ID2/PARK7/STAT1/RBFOX2/JUND/TBP/NAB2/UBA2/FOXO3/HMGB1/FLNA/TNFRSF10A/AIP/HMGA2/RPS3/PSMD10/HDAC2/BPTF/TEAD4/PURB/COMMD7/ANXA4/PIAS4/CREBBP/HIF1AN/PURA/EDF1/HMGB2/ELK1/CEBPG/NR1D2/TRIB2/YWHAZ
GO_RECEPTOR_REGULATOR_ACTIVITY	372	0.31541	1.53385	0.000174821	0.0159942	0.0139203	IL11/GDF9/TGFB1/BDNF/CCL27/FGF12/FGF5/TGFB3/IL4/TSLP/CLEC11A/HDGF/BMP10/IL17D/VEGFC/FGF4/FGF16/CSF1/IFNL1/MDK/CCL20/IL24/ANGPT4/STC1/UTS2B/XCL1/SEMA3A/IL18/HGF/FGF7/IL6/IFNL2/IL1RN/FGF8/GDF5/EDN1/FGF22/SPP1/SAA1/NTF4/CCL23/INHBB/AREG/CXCL10/TGFB2/GPI/IL36B/CXCL1/VIP/BMP4/POMC/TNFSF10/NPPA/PTN/SAA2/CCL7/CXCL11/CCL13/FGF20/TNFSF15/CXCL14/FST/HAMP/GHRL/GRN/CXCL13/GDF15/CXCL8/IL1B/CXCL16/REG1A/TYMP/L…
GO_INTRACELLULAR_PROTEIN_TRANSPORT	331	0.317618	1.5314	0.000221494	0.0172123	0.0149804	HSP90AA1/TGFB1/DNAJC19/MED1/RPS27A/GABARAP/RPL12/NUCB1/SRSF6/UBE2L3/NXT1/HSPA8/YWHAQ/PTGS2/YWHAH/SRSF7/HNRNPA2B1/GRPEL1/HTRA2/CLTA/RANBP3/RPL30/RPS7/PDCD5/SCARB2/VPS26A/PABPN1/DYNLL2/BAG4/STX8/HSP90B1/BID/DDX39B/BMP4/MAPK14/STX3/CALR/PRKCI/PARK7/CDC37/STX12/RHOB/RPS4X/SYNJ2BP/GGA1/CDKN1A/AP2A2/ERLEC1/IL1B/VPS25/YWHAB/VTI1B/SSB/ARL6/RTP4/USO1/NAPA/CAT/CHP1/DLG2/ADPRH/STX7/THOC1/SMURF1/HSPA5/SFN/FL…
GO_MYELOID_CELL_DIFFERENTIATION	174	0.33709	1.53067	0.00225328	0.048825	0.042494	IL11/TGFB1/MED1/IL4/CD4/HSPA1A/CSF1/IFI16/DPY30/WDR5/KAT2B/ISG15/PABPC4/PRTN3/CEBPA/PTPN6/HSPA1B/TNRC6B/BMP4/DLL1/IRF4/GNAS/MAPK14/FSTL3/ID2/RBBP5/ASH2L/STAT1/RBFOX2/PTPN2/TESC/BATF/SFRP1/ANXA2/RNF41/FOXO3/PRDX3/JAG1/IL15/CCL3/EFNA4/IL23R/PURB/AGO3/IL20/THBS1/THPO/VEGFA/HSPA9/CREBBP/PTPN11/PRKCQ/AGO1/EPHA2/CSF3R/MB/APP/ROR2/HMGB2/CEBPG/IL31RA
GO_POSITIVE_REGULATION_OF_CELL_POPULATION_PROLIFERATION	441	0.310453	1.52737	0.000107335	0.012114	0.0105432	PRKCZ/BCL2/CLEC7A/IL11/GDF9/TGFB1/MED1/FGF5/TGFB3/IL4/CD4/TSLP/CLEC11A/SRSF6/BMP10/VEGFC/FGF4/NANOG/SHC1/PTGS2/FGF16/CSF1/MATK/CAPNS1/ABL1/MDK/IL24/ADAMTS1/XCL1/B4GALT1/GLUL/IL18/HAVCR2/IL7R/FGF7/IL6/CCNA2/STAMBP/FGF8/EDN1/ESM1/GJA1/RPRD1B/FGFR3/PRTN3/AREG/CXCL10/ELANE/TGFB2/PTPN6/VIP/DDX39B/BMP4/DLL1/NTN1/MAPK14/STX3/CALR/PTN/ID2/CRKL/PRKCI/ASH2L/STAT1/FGF20/HTRA1/REG3A/FGFBP1/RPS4X/GHRL/FGFR4/E…
GO_TRANSCRIPTION_REGULATOR_ACTIVITY	255	0.323319	1.52557	0.000845289	0.0302614	0.0263374	MED1/YBX1/HDGF/PGR/YEATS4/UBE2L3/MAFG/NANOG/ELK3/BRD4/ARID3A/HSPA1A/SUB1/SF1/ABL1/IFI16/ZNF329/GTF2I/KAT2B/NR1D1/HNRNPAB/SRA1/HNRNPK/CEBPA/ELANE/IRF4/APEX1/ID2/PARK7/STAT1/RBFOX2/SAP18/PFDN1/NR5A2/JUND/TBP/HSF1/BATF/NMI/GMEB2/FOXM1/PAX4/HOPX/NAB2/FOXO3/MUC1/RFXAP/TOX3/RUNX3/HMGB1/MNX1/MAX/LCORL/ZNF175/IRF9/ZNF10/AIP/HMGA2/MAZ/TEAD4/NUP98/SNAI2/PCBD1/PURB/PFDN5/DNAJB1/CREB3L2/PIAS4/CREBBP/ACTN2/PU…
GO_REGULATION_OF_CELL_CYCLE	336	0.31475	1.51997	0.000309037	0.0199388	0.0173534	PSMA6/BCL2/HSP90AA1/TGFB1/ANAPC10/PSMA2/MED1/HSP90AB1/RBBP4/CGREF1/APBB2/PSMA1/UBE2E1/BRD4/ARID3A/HSPA1A/PTGS2/DUSP3/PSME2/ABL1/ADAMTS1/KAT2B/MAPK12/HLA-G/PSME1/RBL2/CCNA2/HTRA2/FGF8/EDN1/SMC3/PCNA/CHEK2/RPRD1B/LCMT1/CEBPA/TGFB2/PTPN6/HSPA1B/BID/DDX39B/BMP4/MAPK14/PSMB4/DYNLT3/CALR/APEX1/PES1/ID2/TNKS/CDC37/JUND/KIF23/RHOB/RDX/PSMD7/HSF1/CSNK2A1/CDKN1A/RAD23A/CXCL8/SKP1/IL1B/PDXP/SFRP1/FOXM1/SETM…
GO_EXOCYTOSIS	440	0.307947	1.5148	0.000107379	0.012114	0.0105432	SOD1/HMOX2/CTSG/HSP90AA1/TGFB1/PSMA2/HSP90AB1/MPO/TGFB3/VEGFC/FCAR/HSPA1A/TNFRSF1B/HSPA8/OLFM4/XRCC6/SERPINA3/FAM49B/VWF/ALDOA/B4GALT1/CD14/ITIH4/TMX3/PAFAH1B2/HGF/SRGN/LCN2/ITIH3/CYB5R1/TXNDC5/KCNAB2/B2M/RALA/PRTN3/ELANE/PYGL/TGFB2/S100A12/PTPN6/HSPA1B/GPI/PTX3/CXCL1/NPPA/MAPK14/STX3/CRISP3/PRSS2/CST3/PCYOX1L/CTSD/APLP2/FTL/PECAM1/FCGR3B/SYT17/PRDX4/SERPINB1/LIN7A/GRN/GNS/PSMD7/PLG/LTA4H/ASAH1/C…
GO_RESPONSE_TO_EXTRACELLULAR_STIMULUS	209	0.326307	1.51122	0.00187099	0.0448798	0.0390604	SOD1/BCL2/MED1/MPO/CD4/GABARAP/GABARAPL1/UPP1/HNRNPA1/HSPA8/PTGS2/IFI16/STC1/PON1/GLUL/P2RX6/LCN2/GLRX2/PCNA/SPP1/INHBB/CXCL10/CLPSL1/HSP90B1/POMC/PTN/NTRK1/TNKS/STAT1/GSS/HAMP/GHRL/TNC/HSF1/KYNU/CDKN1A/GDF15/IGFBP2/IL1B/PDXP/REG1A/SFRP1/MAP1LC3A/GSTP1/ASGR1/FOXO3/OXT/CAT/POR/GABARAPL2
GO_PROTEIN_LOCALIZATION_TO_MEMBRANE	216	0.324655	1.50768	0.00163368	0.0420367	0.0365859	PRKCZ/BCL2/HSP90AA1/TGFB1/RPS27A/RPL12/BSG/YWHAQ/YWHAH/AGRN/RPL30/RPS7/PDCD5/BAG4/STX8/GZMB/BID/STX3/PTN/CRKL/PRKCI/SHANK3/RDX/RPS4X/LIN7A/SYNJ2BP/GGA1/TESC/GPC2/GBP1/YWHAB/VTI1B/CNPY4/ANXA2/TNFRSF1A/ARL6/RTP4/PPP3R1/EZR/CHP1/BAD/DLG2/PIGR/STX7/SMURF1/HSPA5/SFN/FLNA/GGA3/ITGAL/STX4/MAGI2/RPS3/GPC6/STOM/GOLGA7/ARL5B/RPS5/NCF1/SRP14/ACTN2/DAG1/DPP10/CSRP3/EPHA2/YWHAG/YWHAZ/UBL4A/CAV3/MADCAM1/ITGB7/…
GO_RESPONSE_TO_OXIDATIVE_STRESS	210	0.324439	1.50276	0.00208304	0.0471202	0.0410102	SOD1/HMOX2/BCL2/MPO/PSIP1/LONP1/HSPA1A/PTGS2/ABL1/HGF/STAU1/TXNRD1/IL6/LCN2/CCNA2/HTRA2/HNRNPD/FGF8/EDN1/MCL1/GLRX2/PCNA/HNRNPM/AREG/HSPA1B/APEX1/PARK7/STAT1/TPO/GSS/RHOB/ADPRHL2/PRDX4/CRK/HSF1/ATOX1/MAP1LC3A/GSTP1/FOXO3/CAT/FBLN5/BAD/KRT1/CA3/PRDX3/NET1/STX4/ANXA1/IL18RAP/RPS3/HDAC2/NCF2/PDGFD/APOD/NCF1/HMOX1/NUDT1/DHFR/EGLN1/MICB/MB/APP/GCH1/PXDN/MAPT/GCLM/PRDX6/PRNP/EIF2S1/MSRB2/CAPN2/UBE3A/ST…
GO_CELLULAR_MACROMOLECULE_CATABOLIC_PROCESS	342	0.310133	1.49947	0.000352664	0.0204495	0.0177979	VIM/PSMA6/HSP90AA1/ANAPC10/PSMA2/HSP90AB1/RPS27A/RPL12/YBX1/UBE2L3/PSMA1/LONP1/UBE2E1/TAF15/HSPA1A/TNFRSF1B/HSPA8/UBQLN4/CLPP/PSME2/NR1D1/ISG15/FURIN/DNASE1L2/UBQLN2/PSME1/IL6/DNAJB2/HTRA2/HNRNPD/CLTA/EDC4/RPL30/PPT1/PABPC4/RPS7/SUMO2/CHEK2/HNRNPM/CEBPA/HSP90B1/HSPA1B/TNRC6B/VIP/MAPK14/PSMB4/APEX1/PCNP/CST3/PARK7/RNF8/PCYOX1L/RDX/RPS4X/PSMD7/HSF1/PLG/CSNK2A1/RAD23A/UBXN4/UBE2S/RAD23B/AP2A2/ERLEC1…
GO_REGULATION_OF_CELLULAR_PROTEIN_LOCALIZATION	212	0.323216	1.4981	0.0021305	0.0475032	0.0413436	PRKCZ/BCL2/HSP90AA1/TGFB1/BDNF/HSP90AB1/NUCB1/UBE2L3/YWHAQ/PTGS2/YWHAH/GLUL/HTRA2/PDCD5/KCNAB2/BAG4/STX8/GZMB/BID/BMP4/MAPK14/STX3/PTN/CRKL/PRKCI/PARK7/RDX/TAX1BP3/ERLEC1/GPC2/IL1B/GBP1/YWHAB/VTI1B/CNPY4/PPP3R1/EZR/CHP1/BAD/ATAD1/STX7/SFN/FLNA/STX4/CSNK2A2/GPC6/STOM/BRSK2/APOD/PTPN11/ACTN2/DAG1/DPP10/CSRP3/EPHA2/YWHAG/TERF1/YWHAZ/CAV3/MAPT/ANP32B/NSFL1C/PTPN1/UBXN2B/RAN/PRNP/GDI1/CLTC/EPB41/LILRB…
GO_PROTEIN_LOCALIZATION_TO_ORGANELLE	272	0.315572	1.49673	0.0011127	0.035789	0.0311483	PRKCZ/BCL2/HSP90AA1/TGFB1/DNAJC19/MED1/RPS27A/RPL12/YBX1/UBE2L3/NXT1/HSPA8/YWHAQ/PTGS2/YWHAH/GLUL/SRGN/GRPEL1/CHCHD10/HTRA2/RPL30/RPS7/PDCD5/SCARB2/BAG4/GZMB/BID/NUDCD3/BMP4/MAPK14/CALR/PES1/TNKS/PARK7/RDX/RPS4X/GGA1/MX1/CDKN1A/SKP1/VPS25/GBP1/YWHAB/VTI1B/DNAJB6/SSB/ARL6/PPP3R1/EZR/CAT/CHP1/BAD/DLG2/ATAD1/SMURF1/HSPA5/SFN/FLNA/GGA3/HK2/CSNK2A2/AIP/RPS3/DECR2/GPC6/SPRN/NUP98/MBTPS1/ARL5B/RPS5/GBP2…
GO_CHROMOSOME	276	0.313595	1.49	0.00119918	0.0376871	0.0328003	ASF1A/MBD4/TMPO/MED1/RBBP4/PGR/PSIP1/NANOG/ELK3/BRD4/UBQLN4/XRCC6/SSRP1/KAT2B/NR1D1/HNRNPA2B1/SUMO3/POLE3/RBL2/HTRA2/HNRNPK/SMC3/PBRM1/PCNA/RECQL/CHEK2/KIF22/CEBPA/IRF4/DYNLT3/APEX1/PES1/TNKS/PARK7/ASH2L/STAT1/DCTN6/RNF8/NR5A2/JUND/ADPRHL2/TBP/HSF1/CSNK2A1/BATF/GMEB2/RBM19/FOXM1/PAX4/HOPX/SSB/SETMAR/FOXO3/FH/CHEK1/MUC1/THOC1/RUNX3/HMGB1/MNX1/FLNA/MAX/IRF9/CSNK2A2/HMGA2/HDAC2/BPTF/SUGT1/TEAD4/NUP9…
GO_CELL_CYCLE	454	0.30117	1.48476	0.000213922	0.0172123	0.0149804	PSMA6/BCL2/HSP90AA1/TGFB1/ANAPC10/PSMA2/MED1/HSP90AB1/RBBP4/CGREF1/YEATS4/UBE2L3/APBB2/ERH/PSMA1/UBE2E1/BRD4/ARID3A/HSPA1A/PTGS2/DUSP3/PSME2/ABL1/ADAMTS1/KAT2B/CAMK2A/MAPK12/HLA-G/HGF/PSME1/NUDC/POLE3/RBL2/CCNA2/STAMBP/HTRA2/FGF8/CLTA/EDN1/ING1/SMC3/PBRM1/PCNA/GJA1/RALA/CHEK2/RPRD1B/LCMT1/KIF22/CEBPA/TGFB2/TMPRSS11A/PTPN6/HSPA1B/BID/DDX39B/BMP4/MAPK14/PSMB4/DYNLT3/CALR/APEX1/PES1/ID2/PCNP/TNKS/CD…
GO_POSITIVE_REGULATION_OF_NUCLEOBASE_CONTAINING_COMPOUND_METABOLIC_PROCESS	490	0.299338	1.48197	0.00019129	0.0166821	0.0145189	DCN/IL11/HSP90AA1/TGFB1/ASF1A/MED1/HSP90AB1/RPS27A/TGFB3/IL4/CD4/TBK1/YBX1/PGR/YEATS4/UBE2L3/BMP10/ILF3/MAFG/NCL/FGF4/NANOG/SHC1/HNRNPA1/ELK3/BRD4/ARID3A/TAF15/HSPA1A/TNFRSF1B/TRA2B/SUB1/XRCC6/ABL1/IFI16/IFNL1/MDK/WDR5/KAT2B/NR1D1/YWHAH/AGRN/IL18/HNRNPAB/HNRNPA2B1/HGF/FGF7/IL6/CCNA2/CHCHD10/HNRNPD/EDN1/SRA1/HNRNPK/ING1/SUMO2/PCNA/SPP1/CHEK2/RPRD1B/CEBPA/CXCL10/TGFB2/TNRC6B/DDX39B/BMP4/DLL1/POMC/I…
GO_MITOTIC_CELL_CYCLE	272	0.309818	1.46944	0.00168041	0.0425656	0.0370462	PSMA6/BCL2/HSP90AA1/TGFB1/ANAPC10/PSMA2/YEATS4/PSMA1/UBE2E1/BRD4/ARID3A/HSPA1A/DUSP3/PSME2/ABL1/ADAMTS1/CAMK2A/HGF/PSME1/POLE3/RBL2/CCNA2/STAMBP/FGF8/EDN1/SMC3/PBRM1/PCNA/GJA1/CHEK2/LCMT1/KIF22/PTPN6/HSPA1B/BID/BMP4/PSMB4/DYNLT3/APEX1/ID2/TNKS/KIF23/RHOB/RDX/PSMD7/HSF1/SBDS/CDKN1A/UBE2S/SKP1/IL1B/PDXP/FOXM1/SETMAR/PRC1/CCL2/CHEK1/MUC1/SFN/FLNA/MAX/PSMA7/CUL4B/MAGI2/ANXA1/NAA10/HMGA2/PSMD10/BRSK2/…
GO_INTRACELLULAR_TRANSPORT	487	0.29619	1.46577	0.00027656	0.0186916	0.0162679	SOD1/PRKCZ/HSP90AA1/TGFB1/DNAJC19/MED1/RPS27A/GABARAP/RPL12/NUCB1/SRSF6/UBE2L3/PSIP1/HNRNPA1/NXT1/HSPA8/YWHAQ/PTGS2/SNRPG/DPY30/YWHAH/SRSF7/HNRNPA2B1/TRAPPC4/GRPEL1/HTRA2/CLTA/RANBP3/RPL30/RPS7/PDCD5/SCARB2/VPS26A/PABPN1/DYNLL2/BAG4/STX8/AREG/CAPZA1/HSP90B1/BID/DDX39B/BMP4/NTN1/NPPA/MAPK14/STX3/CALR/PRKCI/PARK7/CDC37/DCTN6/ANXA8/STX12/LMAN2/KIF23/RHOB/RDX/RPS4X/SYNJ2BP/PROC/GGA1/CDKN1A/TINAGL1/NE…
GO_CELL_CYCLE_PROCESS	345	0.302668	1.4644	0.000836544	0.030211	0.0262936	PSMA6/BCL2/HSP90AA1/TGFB1/ANAPC10/PSMA2/MED1/HSP90AB1/RBBP4/CGREF1/UBE2L3/APBB2/PSMA1/UBE2E1/BRD4/ARID3A/HSPA1A/PSME2/ABL1/ADAMTS1/KAT2B/CAMK2A/MAPK12/HLA-G/PSME1/POLE3/RBL2/CCNA2/STAMBP/FGF8/EDN1/SMC3/PCNA/GJA1/CHEK2/RPRD1B/LCMT1/KIF22/TGFB2/PTPN6/HSPA1B/BID/BMP4/PSMB4/CALR/APEX1/ID2/TNKS/KIF23/RHOB/RDX/PSMD7/HSF1/SBDS/CSNK2A1/CDKN1A/UBE2S/CXCL8/SKP1/IL1B/PDXP/SFRP1/FOXM1/CETN3/SETMAR/PRC1/CCL2/…
GO_RESPONSE_TO_LIPID	379	0.299672	1.45956	0.000741064	0.0279904	0.024361	VIM/BCL2/DCN/CTSG/TGFB1/MBD4/MED1/MPO/TGFB3/CD4/PGR/UBE2L3/TNFRSF1B/PTGS2/ABL2/DHH/ABL1/MDK/IL24/LBP/NR1D1/STC1/YWHAH/CD14/PON1/IL18/HAVCR2/IL6/GRAMD1C/LCN2/CCNA2/HTRA2/IL1RN/HNRNPD/EDN1/PCNA/SPP1/GJA1/PABPN1/AREG/CXCL10/ELANE/ADAM15/TGFB2/FKBP4/IL36B/CXCL1/BMP4/MAPK14/CALR/PTN/CXCL11/PARK7/RBFOX2/NR5A2/JUND/HAMP/TNC/CXCL13/HSF1/LRP8/CDKN1A/TESC/IGFBP2/NEFL/CXCL8/IL1B/SFRP1/ACP5/YES1/GSTP1/MRC1/P…
GO_SUPRAMOLECULAR_COMPLEX	295	0.305267	1.45919	0.00181606	0.0444373	0.0386752	VIM/PSMA6/DCN/CTSG/G3BP2/PSMA2/COL23A1/GABARAP/JAM3/GABARAPL1/YBX1/G3BP1/BMP10/NCL/PABPC3/SNRPG/KAT2B/ALDOA/STAU1/BLNK/NUDC/SUMO3/TNNT2/EDC4/HNRNPK/LMNB1/PABPC4/SAA1/KCNAB2/DYNLL2/KIF22/INA/FKBP4/TNRC6B/DYNLT3/TPT1/DCTN6/PECAM1/RAC3/KIF23/RPS4X/SERPINB1/HSF1/NEFL/MYL3/COL3A1/MAP1LC3A/DNAJB6/ARL6/YES1/AIF1L/PRC1/EZR/FBLN5/SNRPB2/SYNE2/KRT1/CFL2/FLNA/MFAP4/TWF1/ANXA1/TNNI2/PARVA/ELAVL1/STMN1/SUGT1/…
GO_POSITIVE_REGULATION_OF_HYDROLASE_ACTIVITY	286	0.306019	1.45882	0.00182412	0.0444373	0.0386752	PRKCZ/CLEC7A/FAM162A/BDNF/DNAJC19/PLA2G5/HSP90AB1/ARHGDIA/HSPA1A/ABL2/TNFRSF10B/PSME2/IFI16/CCL20/ARHGAP36/XCL1/MAPK12/AGRN/PSME1/DNAJB2/HTRA2/RANBP3/TNNT2/PDCD5/PCNA/NTF4/CCL23/FGFR3/DYNLL2/PRTN3/RGS5/BID/TNFSF10/MAPK14/ARHGAP30/CCL7/CD200/CRKL/CCL13/NTRK1/LCK/TNFSF15/CTSD/GRN/CRK/CXCL13/HSF1/TAX1BP3/MYL3/HSPE1/SFRP1/RGS1/DNAJB6/SETMAR/GM2A/CCL14/F3/CCL2/NAPA/ARHGDIB/BAD/GABARAPL2/GDI2/ADPRH/ALD…
GO_CELLULAR_HOMEOSTASIS	308	0.303303	1.45499	0.00169529	0.0425656	0.0370462	SOD1/HMOX2/BCL2/MPO/CD4/MAFG/TRA2B/ABL2/ABL1/GTF2I/NR1D1/STC1/ALDOA/PDIA4/XCL1/KEL/TMX3/TXNRD1/IL6/C1QTNF1/LCN2/DNAJB2/NADK/EDN1/ISCU/PPT1/MCL1/GLRX2/TXNDC5/GJA1/SAA1/CMA1/CCL23/CXCL10/ELANE/PTPN6/HSP90B1/CALR/APEX1/CCL7/CXCL11/TPT1/CCL13/LCK/GLRX/GSTO1/FTL/SHANK3/HAMP/GHRL/PRDX4/GRN/CXCL13/PLG/UBE2S/SKP1/CAMK2D/ATOX1/ANXA2/CXCL12/PLCG2/CCL14/OXT/CCL2/CHP1/BAD/PTH1R/CFL2/PDIA6/PRDX3/HMGB1/STX4/TN…
GO_REGULATION_OF_CELLULAR_RESPONSE_TO_STRESS	290	0.304177	1.45211	0.00202125	0.0461592	0.0401739	SOD1/BCL2/HSP90AA1/HSP90AB1/HSPA1A/HSPA8/UBQLN4/PTGS2/DUSP3/ABL1/CAMK2A/SEMA3A/HLA-G/UBQLN2/HGF/HTRA2/IL1RN/EDN1/HNRNPK/MCL1/PCNA/SPP1/B2M/CHEK2/BAG4/TGFB2/FKBP4/HSPA1B/BID/IL36B/DDX39B/NPPA/PTN/TPT1/PARK7/EDAR/PTPN2/RNF8/EDA2R/GRN/HSF1/ERLEC1/IL1B/CAMK2B/SFRP1/FOXM1/CAMK2D/NUDT16L1/DNAJB6/SETMAR/GSTP1/CXCL12/SCARF1/EZR/FBLN5/BAD/CD40LG/CHEK1/MAP4K1/MUC1/THOC1/HSPA5/MIF/KIR2DL4/HMGB1/HMGA2/RPS3/P…
GO_SECRETORY_GRANULE	459	0.291923	1.44004	0.000427387	0.022439	0.0195294	SOD1/HMOX2/CTSG/HSP90AA1/TGFB1/PSMA2/HSP90AB1/MPO/TGFB3/BSG/VEGFC/FCAR/HSPA1A/TNFRSF1B/HSPA8/OLFM4/XRCC6/SERPINA3/FAM49B/VWF/ALDOA/PLA2G2A/B4GALT1/CD14/ITIH4/TMX3/PCSK2/THBS2/PAFAH1B2/HGF/SRGN/LCN2/EDN1/ITIH3/CYB5R1/TXNDC5/CMA1/KCNAB2/B2M/PRTN3/ELANE/ADAM15/PYGL/TGFB2/S100A12/PTPN6/HSPA1B/GPI/PTX3/CXCL1/POMC/MAPK14/STX3/FSTL3/CRISP3/CALR/PRSS2/CST3/PCYOX1L/CTSD/APLP2/FTL/PECAM1/FCGR3B/GHRL/PRDX4/…
GO_REGULATION_OF_CATABOLIC_PROCESS	331	0.298127	1.43742	0.0018827	0.0448798	0.0390604	VIM/PSMA6/BCL2/DCN/HSP90AA1/PSMA2/HSP90AB1/RPS27A/IL4/TBK1/YBX1/PSMA1/TAF15/HSPA1A/TNFRSF1B/HSPA8/UBQLN4/ABL2/SPTLC2/CAPNS1/PSME2/ABL1/IFI16/FURIN/UBQLN2/PAFAH1B2/HGF/PSME1/IL6/DNAJB2/HTRA2/HNRNPD/MCL1/PABPC4/RPS7/SUMO2/SCARB2/VPS26A/GJA1/CHEK2/HNRNPM/CEBPA/HSPA1B/TNRC6B/VIP/MAPK14/PSMB4/APEX1/CST3/PARK7/CDC37/RDX/GGA1/PSMD7/HSF1/CSNK2A1/RAD23A/RAD23B/ERLEC1/IL1B/YWHAB/GAPDH/ANXA2/RNF41/FOXO3/EZR…
GO_RESPONSE_TO_GROWTH_FACTOR	366	0.29594	1.43735	0.00140163	0.0395537	0.0344249	PRKCZ/DCN/CILP/GDF9/TGFB1/BDNF/MED1/FGF12/HSP90AB1/FGF5/RPS27A/TGFB3/BMP10/NCL/VEGFC/FGF4/SHC1/HNRNPA1/HSPA1A/TNFRSF1B/FGF16/DUSP3/ABL1/FURIN/XCL1/HGF/ADAMTSL2/FGF7/STMN2/CCNA2/HTRA2/FGF8/GDF5/EDN1/FGF22/FLRT1/PDCD5/NTF4/HNRNPM/FGFR3/BAG4/TGFB2/FGFBP3/IBSP/BMP4/DLL1/MAPK14/HNRNPF/FSTL3/PTN/CRKL/NTRK1/FGFRL1/RBFOX2/FGF20/HTRA1/FGFBP1/RDX/FST/FGFR4/CRK/TNC/CXCL13/CFC1/LRP8/GDF15/CXCL8/IL1B/COL3A1/S…
GO_CELL	344	0.29695	1.43631	0.00171802	0.0426091	0.037084	SOD1/PRKCZ/HMOX2/BCL2/MPO/CD4/MAFG/TRA2B/ABL2/ABL1/GTF2I/STC1/ALDOA/PDIA4/XCL1/KEL/TMX3/TXNRD1/IL6/C1QTNF1/LCN2/DNAJB2/EDN1/ISCU/PPT1/MCL1/GLRX2/TXNDC5/GJA1/SAA1/CMA1/CCL23/KIF22/CXCL10/ELANE/HSP90B1/MAPK14/CALR/APEX1/CCL7/CXCL11/TPT1/CCL13/LCK/PARK7/GLRX/GSTO1/FTL/KIF23/SHANK3/HAMP/GHRL/PRDX4/LIN7A/GRN/CXCL13/PLG/UBE2S/SKP1/ATOX1/ANXA2/ARL6/CXCL12/PLCG2/CCL14/OXT/CCL2/EZR/CHP1/PTH1R/SYNE2/CFL2/P…
GO_INFLAMMATORY_RESPONSE	379	0.294347	1.43363	0.00124237	0.037991	0.0330648	PSMA6/SOD1/PRKCZ/CLEC7A/TGFB1/IL4/JAM3/TSLP/TBK1/PSMA1/IL17D/BRD4/TNFRSF1B/PTGS2/CSF1/IL17RB/SERPINA3/IFI16/MDK/CCL20/LBP/NR1D1/XCL1/PLA2G2A/B4GALT1/CD14/ITIH4/IL18/HGF/HAVCR2/BLNK/IL1RL1/IL6/IL1RN/SPP1/GJA1/SAA1/CMA1/CCL23/CEBPA/CXCL10/ELANE/S100A12/PTX3/IL36B/CXCL1/NPPA/MAPK14/PSMB4/PTN/SAA2/CCL7/CD200/CXCL11/CCL13/PARK7/CST7/PTPN2/IGFBP4/REG3A/HAMP/GHRL/GRN/LILRA5/PROC/CXCL13/CD47/CXCL8/IL1B/N…
GO_RESPONSE_TO_DRUG	381	0.291484	1.42015	0.00159059	0.0411852	0.0358448	VIM/SOD1/BCL2/GDF9/TGFB1/HSP90AB1/TGFB3/NUCB1/VEGFC/HNRNPA1/PTGS2/ABL1/MDK/CD14/AGRN/BCAR3/HGF/P2RX6/IL6/LCN2/CCNA2/HNRNPD/FGF8/EDN1/NNMT/GLRX2/PCNA/GJA1/B2M/CHEK2/AREG/ADAM15/TGFB2/HSP90B1/ALK/GNAS/MAPK14/CALR/PTN/APEX1/CRKL/NTRK1/LCK/PARK7/STAT1/FGF20/HPRT1/JUND/RHOB/HAMP/GHRL/SYT17/CRK/TNC/HSF1/KYNU/LRP8/CDKN1A/IGFBP2/SLC25A18/NEFL/IL1B/PDXP/REG1A/SFRP1/MAP1LC3A/GSTP1/CXCL12/QDPR/OXT/CA9/BLMH/…
GO_RESPONSE_TO_ABIOTIC_STIMULUS	452	0.287972	1.41936	0.000877343	0.030872	0.0268689	PSMA6/SOD1/HMOX2/BCL2/DCN/HSP90AA1/FAM162A/MBD4/PSMA2/HSP90AB1/RPS27A/MPO/TGFB3/TNFRSF8/PSMA1/PSIP1/LONP1/VEGFC/XRCC4/HSPA1A/HSPA8/PTGS2/TNFRSF10B/FGF16/XRCC6/PSME2/IFI16/MDK/ANGPT4/STC1/CAMK2A/CD14/PSME1/ANGPTL4/POLE3/CCNA2/HTRA2/NETO1/HNRNPD/GDF5/EDN1/GLRX2/PCNA/GJA1/CHEK2/BAG4/CXCL10/ELANE/ADAM15/TGFB2/FKBP4/HSP90B1/HSPA1B/NPPA/MAPK14/PSMB4/PTN/ID2/NTRK1/STAT1/RNF8/JUND/SHANK3/RHOB/HAMP/GHRL/T…
GO_REGULATION_OF_TRANSFERASE_ACTIVITY	374	0.290677	1.41416	0.00196584	0.045985	0.0400222	SOD1/PRKCZ/HSP90AA1/TGFB1/BDNF/FCGR1A/HSP90AB1/RPS27A/TCL1B/TGFB3/IL4/CD4/UBE2L3/SHC1/TNFRSF10B/CSF1/XRCC6/DUSP3/ABL1/ANGPT4/KAT2B/IL18/HNRNPA2B1/HGF/RBL2/CCNA2/HNRNPD/EDN1/RPS7/SAA1/PABPN1/FGFR3/CEBPA/CXCL10/ELANE/TGFB2/S100A12/PTPN6/BMP4/ALK/NPPA/MAPK14/CD200/CRKL/NTRK1/TNKS/PARK7/CDC37/PTPN2/TNFSF15/GHRL/LILRA5/CRK/MAPKAPK5/LRP8/CDKN1A/GDF15/TESC/UBE2S/IL1B/TARBP2/VPS25/SFRP1/GSTP1/NAB2/CHI3L1…
GO_SECRETORY_VESICLE	498	0.284809	1.41135	0.000785013	0.0293809	0.0255711	SOD1/HMOX2/CTSG/HSP90AA1/TGFB1/BDNF/PSMA2/HSP90AB1/MPO/TGFB3/BSG/VEGFC/FCAR/HSPA1A/TNFRSF1B/HSPA8/OLFM4/XRCC6/SERPINA3/FAM49B/VWF/ALDOA/PLA2G2A/B4GALT1/CD14/ITIH4/TMX3/PCSK2/THBS2/PAFAH1B2/HGF/TRAPPC4/SRGN/LCN2/CLTA/EDN1/ITIH3/CYB5R1/PPT1/TXNDC5/CMA1/KCNAB2/B2M/NTF4/PRTN3/ELANE/ADAM15/PYGL/TGFB2/S100A12/PTPN6/HSPA1B/GPI/PTX3/CXCL1/POMC/MAPK14/STX3/FSTL3/CRISP3/CALR/PRSS2/CST3/STX12/PCYOX1L/CTSD/A…
GO_INTERSPECIES_INTERACTION_BETWEEN_ORGANISMS	380	0.288832	1.40712	0.00222188	0.0484658	0.0421814	VIM/BCL2/EFNB3/CLEC7A/CTSG/TGFB1/G3BP2/HSP90AB1/RPS27A/CD4/RPL12/TBK1/ULBP3/G3BP1/ILF3/PSIP1/XRCC4/SHC1/HNRNPA1/BRD4/HSPA1A/HSPA8/XRCC6/EIF3G/IFI16/KAT2B/ISG15/FURIN/STAU1/CCNA2/HNRNPK/RPL30/RPS7/SCARB2/PCNA/GNLY/B2M/PABPN1/RNGTT/INHBB/CEBPA/ULBP1/ELANE/IL2RG/S100A12/HSPA1B/PTX3/DDX39B/PSMB4/CCL13/LCK/STAT1/REG3A/NR5A2/RPS4X/HAMP/TBP/MX1/PLG/REG1B/RAD23A/CXCL8/AP2A2/SKP1/TARBP2/YWHAB/REG1A/GAPDH/…
GO_EXTRACELLULAR_MATRIX	332	-0.244143	-1.40049	0.00124636	0.037991	0.0330648	DGCR6/COL10A1/COL20A1/ADAM19/A1BG/PRG2/LRRN1/LUM/MATN4/MMP20/GPC5/MMP14/SFRP2/MMRN2/VCAN/ASPN/ECM1/RELL2/FLRT2/APOC3/KNG1/EDIL3/CTSF/DPT/MMP2/CTSC/TGFBI/PRG3/FBLN1/TIMP2/LINGO3/CBLN1/VWC2/VIT/FGF1/ITIH1/APOH/CTHRC1/NCAN/LEFTY2/TNR/IFNA2/MARCO/LINGO1/NCAM1/TGM4/SCARA3/VWA2/CFP/THBS3/MYOC/SPOCK2/F7/TFIP11/COL25A1/TPSAB1/IHH/IGFALS/FMOD/SERPINC1/ITIH2/HRG/APOA4/A2M/COMP/TNXB/TRIL/FGB/LRRC15/THBS4/FG…
GO_RECEPTOR_COMPLEX	201	-0.273869	-1.48482	0.000666756	0.0264646	0.023033	ALCAM/ITLN1/EPHA1/SLITRK5/ACVR2A/PLXNA4/IL3RA/NOTCH3/GRID2/CSF2RB/PLXND1/SHANK1/IL6ST/VWC2/SCIMP/NOTCH1/BMPR1B/CSF2RA/TF/CD36/ROR1/IL4R/EPHA4/FLT4/CD3E/IL27RA/CNTFR/ZAP70/ERBB3/IGF1R/INSR/CR2/PLXNC1/ENG/CD8B/LIFR/TRADD/TRIL/NTRK3/PLA2R1/PLXNA1/TRAF1/TYRO3/KDR/OLFM2/VLDLR/IL11RA/GHR/KIT/NTRK2
GO_CELL_CELL_ADHESION_VIA_PLASMA_MEMBRANE_ADHESION_MOLECULES	118	-0.337245	-1.69392	0.000567483	0.0240958	0.0209713	PCDHGB1/NRXN1/KIRREL3/PVR/IL1RAP/CDHR3/PCDHA4/DSCAML1/DSC1/CDH6/PTPRS/DSCAM/ALCAM/CDH17/CLSTN1/SLITRK1/GRID2/CD209/CDH8/CX3CL1/CBLN1/MPZ/MDGA1/CADM1/UNC5D/ROBO2/ROBO1/PCDHB2/CDH5/DSG1/NPTN/MPZL2/DSC3/APOA1/PTPRD/LRFN5/CDH3/PCDH9/CNTN4/L1CAM/LRRC4C
GO_CATION_TRANSMEMBRANE_TRANSPORTER_ACTIVITY	67	-0.386466	-1.75459	0.00106448	0.0350596	0.0305135	JPH4/ATP1B3/SLC4A8/ANXA5/JPH3/ANXA9/HCN1/CNGA2/LRRC52/KCNIP3/SLC6A16/PKD2/KCNA10/PDE2A/SLC3A2/KCNN1/SLC41A2/COX7A1/KCNE3/ATP2A3/COX6A2/SLC6A9/COX4I2/TF/SLC5A8/SLC22A16/ATP1B2/KCNG4/SCN2B/KCNIP1/CACNA2D3/SLC30A3/ATP1B1
GO_METAL_ION_TRANSMEMBRANE_TRANSPORTER_ACTIVITY	50	-0.429666	-1.83333	0.000696816	0.0270641	0.0235547	JPH4/ATP1B3/SLC4A8/ANXA5/JPH3/ANXA9/HCN1/LRRC52/KCNIP3/SLC6A16/PKD2/KCNA10/PDE2A/SLC3A2/KCNN1/KCNE3/ATP2A3/SLC6A9/TF/SLC5A8/ATP1B2/KCNG4/SCN2B/KCNIP1/CACNA2D3/SLC30A3/ATP1B1
GO_ACTIVE_ION_TRANSMEMBRANE_TRANSPORTER_ACTIVITY	20	-0.566937	-1.92095	0.00198593	0.0461592	0.0401739	ATP1B3/SLC4A8/ANXA5/SLC6A16/SLC3A2/SLC26A5/SLCO5A1/ATP2A3/SLC6A9/SLC5A8/SLC26A11/ATP1B2/PCYOX1/SLC30A3/ATP1B1
GO_ACTIVE_TRANSMEMBRANE_TRANSPORTER_ACTIVITY	30	-0.509787	-1.92979	0.0012745	0.037991	0.0330648	ATP1B3/SLC4A8/ANXA5/SLC6A16/CFTR/SLC3A2/SLC26A5/SLCO5A1/CDH17/ATP2A3/SLC6A9/SLC5A8/SLC26A11/ATP1B2/PCYOX1/TOMM20L/SLC30A3/ATP1B1
GO_CALCIUM_DEPENDENT_CELL_CELL_ADHESION_VIA_PLASMA_MEMBRANE_CELL_ADHESION_MOLECULES	19	-0.588549	-1.96719	0.00140268	0.0395537	0.0344249	CDH6/CDH17/CDH8/PCDHB2/CDH5/DSG1/CDH3
GO_HIGH_DENSITY_LIPOPROTEIN_PARTICLE_REMODELING	11	-0.702531	-1.9812	0.00201623	0.0461592	0.0401739	ALB/APOA4/APOC1/APOA1/APOM
GO_SMOOTH_MUSCLE_CELL_DIFFERENTIATION	22	-0.571169	-1.99201	0.000861425	0.0305732	0.0266088	MECP2/NPNT/NOTCH1/COMP/ENG/NFATC1/FGF9/OLFM2/SOD2/KIT/SHH
GO_REGULATION_OF_POSTSYNAPTIC_DENSITY_ORGANIZATION	14	-0.654843	-1.99895	0.00128267	0.037991	0.0330648	IL1RAP/PTPRS/LRRTM2/GRID2/CBLN1/NTRK3/PTPRD/LRFN1
GO_VASCULAR_SMOOTH_MUSCLE_CELL_DIFFERENTIATION	11	-0.719875	-2.03012	0.00129246	0.0380075	0.0330791	COMP/ENG/NFATC1/FGF9/SOD2/KIT
GO_REGULATION_OF_SMOOTH_MUSCLE_CELL_DIFFERENTIATION	13	-0.697215	-2.07787	0.000689911	0.0270511	0.0235434	NFATC1/FGF9/OLFM2/SOD2/KIT/SHH
GO_REGULATION_OF_EXCITATORY_SYNAPSE_ASSEMBLY	13	-0.699822	-2.08564	0.000583771	0.0240958	0.0209713	NRXN1/IL1RAP/PTPRS/LRRTM2/GRID2/CBLN1/NTRK3/PTPRD/LRFN1
GO_PROTEIN_LIPID_COMPLEX_ASSEMBLY	18	-0.636606	-2.0954	0.000276947	0.0186916	0.0162679	APOC3/BMP1/APOB/APOA4/APOC1/APOA1/APOM
GO_REGULATION_OF_POSTSYNAPTIC_SPECIALIZATION_ASSEMBLY	12	-0.782152	-2.2648	0.000105263	0.012114	0.0105432	IL1RAP/PTPRS/LRRTM2/GRID2/CBLN1/NTRK3/PTPRD/LRFN1
GO_TRIGLYCERIDE_RICH_PLASMA_LIPOPROTEIN_PARTICLE	14	-0.744557	-2.27281	0.000106889	0.012114	0.0105432	APOH/APOB/APOA4/APOC1/PCYOX1/APOA1/VLDLR/APOM

## Sheet: Table S2_Padj Ranked.
Supplementary Table 2. List of pathways significantly enriched for in gene set enrichment analysis of PC1 proteins
To identify biological processes enriched for in our principle components analysis (PCA), gene set enrichment analysis (GSEA, Broad Institute) was performed using Gene Ontology (GO) data, along with SASP protein sets (Supplementary Table 3). Since PC1 clustered subjects into their pre-specified groups, we included all PC1 proteins in the GSEA. Pathways are ranked according to a) normalized enrich…
PATHWAY	Set Size	Enrichment Score	NES	p-value	p adjusted	qvalues	core_enrichment
GO_CYTOKINE_MEDIATED_SIGNALING_PATHWAY	432	0.367198	1.80376	2.15248e-05	0.00956436	0.00832418	VIM/PSMA6/SOD1/BCL2/IL11/HSP90AA1/TGFB1/FCGR1A/PSMA2/MED1/HSP90AB1/RPS27A/IL4/CD4/TSLP/TBK1/TNFRSF8/IL22RA1/PSMA1/NANOG/SHC1/HSPA1A/TNFRSF1B/HSPA8/PTGS2/IL21R/CSF1/IL17RB/PSME2/IL15RA/IFNL1/CCL20/IL24/HNRNPDL/LBP/ISG15/XCL1/CAMK2A/HLA-G/IL18/HNRNPA2B1/HGF/IL7R/PSME1/IL1RL1/IL6/LCN2/IFNL2/TNFRSF6B/IL1RN/EDN1/LMNB1/MCL1/TNFRSF13B/SAA1/B2M/RALA/CCL23/PRTN3/BAG4/CEBPA/CXCL10/CAPZA1/IL2RG/PTPN6/HSP90B…
GO_LEUKOCYTE_MEDIATED_IMMUNITY	419	0.334995	1.64305	2.15475e-05	0.00956436	0.00832418	PRKCZ/HMOX2/CTSG/HSP90AA1/TGFB1/PSMA2/HSP90AB1/MPO/IL4/ULBP3/FCAR/HSPA1A/TNFRSF1B/HSPA8/OLFM4/XRCC6/SERPINA3/FAM49B/SH2D1A/ALDOA/XCL1/B4GALT1/CD14/HLA-G/IL18/PAFAH1B2/HAVCR2/IL7R/IL6/LCN2/TXNDC5/KCNAB2/B2M/PRTN3/ULBP1/ELANE/PYGL/GZMB/S100A12/PTPN6/HSPA1B/GPI/PTX3/CXCL1/CD226/NPPA/MAPK14/CRISP3/PRSS2/CST3/C9/RNF8/CTSD/HPRT1/FTL/PECAM1/FCGR3B/PRDX4/SERPINB1/GRN/GNS/CRK/PSMD7/LTA4H/ASAH1/CD47/BATF/A…
SENESCENCE_ASSOCIATED_SECRETORY_PHENOTYPE_2	403	0.400042	1.95723	2.16244e-05	0.00956436	0.00832418	VIM/SOD1/BCL2/DCN/IL11/HSP90AA1/TGFB1/PSMA2/CCL27/HSP90AB1/NID1/IL4/RPL12/NUCB1/CLEC11A/ARHGDIA/NCL/VEGFC/HNRNPA1/TNFRSF1B/HSPA8/YWHAQ/LDHB/CCL20/STC1/ALDOA/PDIA4/XCL1/YWHAH/RRBP1/B4GALT1/CD14/AGRN/THBS2/HGF/PSME1/FGF7/IL1RL1/TXNRD1/IL6/ICAM3/IL1RN/HNRNPD/ESM1/HNRNPK/TXNDC5/PCNA/SPP1/B2M/PEBP1/AREG/CXCL10/PYGL/TGFB2/HSP90B1/GPI/WARS/PTX3/CXCL1/BMP4/TNFSF10/PSMB4/FSTL3/CALR/CCL7/CXCL11/CCL13/CST3/…
GO_RNA_BINDING	370	0.447827	2.17652	2.18794e-05	0.00956436	0.00832418	VIM/PSMA6/DCN/CELF2/HSP90AA1/G3BP2/HSP90AB1/NOP16/RPS27A/RPL12/YBX1/HDGF/SRSF6/UBE2L3/ERH/G3BP1/ILF3/NCL/PSMA1/PSIP1/DUT/LONP1/RBM39/HNRNPA1/TAF15/PUF60/HSPA1A/HSPA8/TRA2B/SUB1/SF1/XRCC6/EIF3G/PABPC3/SNRPG/IFI16/SSRP1/EWSR1/HNRNPDL/RBM23/ALDOA/PDIA4/SRSF7/RRBP1/HNRNPAB/HNRNPA2B1/STAU1/HNRNPD/SRA1/HNRNPK/RPL30/PABPC4/RPS7/SUMO2/PABPN1/HDLBP/HNRNPM/PEBP1/BAG4/EIF1AX/FKBP4/HSP90B1/HSPA1B/TNRC6B/DDX3…
GO_CELLULAR_RESPONSE_TO_DNA_DAMAGE_STIMULUS	220	0.401889	1.86991	2.32894e-05	0.00956436	0.00832418	BCL2/ASF1A/MBD4/RPS27A/XRCC4/BRD4/ARID3A/TNFRSF1B/UBQLN4/XRCC6/ABL1/IFI16/SSRP1/ISG15/MAPK12/POLE3/RBL2/HTRA2/HNRNPK/MCL1/SMC3/PCNA/RECQL/CHEK2/MPG/KIF22/BID/DDX39B/MAPK14/APEX1/TPT1/RBBP5/PARK7/ASH2L/RNF8/ADPRHL2/HSF1/CDKN1A/RAD23A/BATF/RAD23B/FOXM1/RBM17/NUDT16L1/TNFRSF1A/SETMAR/CXCL12/POLR2J/BAD/FH/CHEK1/MUC1/THOC1/MIF/SFN/HMGB1/CUL4B/HMGA2/RPS3/PSMD10/SPRED1/PPIE/CASP2/SNAI2/CBX3/PIAS4/TDP1/P…
GO_ORGANIC_CYCLIC_COMPOUND_CATABOLIC_PROCESS	201	0.397989	1.8354	2.35278e-05	0.00956436	0.00832418	VIM/PSMA6/HMOX2/MBD4/PSMA2/RPS27A/RPL12/YBX1/UPP1/PSMA1/DUT/TAF15/HSPA1A/TNFRSF1B/HSPA8/HINT1/PSME2/PDE1A/ASRGL1/YWHAH/DNASE1L2/PSME1/IL6/PDE7A/HNRNPD/EDC4/RPL30/PABPC4/RPS7/SPP1/HNRNPM/NUDT9/HSPA1B/TNRC6B/VIP/NUDT5/MAPK14/PSMB4/APEX1/HPRT1/RPS4X/PSMD7/HSF1/KYNU/PDXP/YWHAB/RNASE6/TYMP/SSB/SETMAR/NUDT3/SCARF1/QDPR/GDNF/RNASE2/HMGB1/CNP/PSMA7/EIF4A3/RPS3/PSMD10/BLVRA/ELAVL1/DCTPP1/PCBD1/AGO3/CIRBP/…
GO_MRNA_METABOLIC_PROCESS	193	0.436692	2.00507	2.36742e-05	0.00956436	0.00832418	VIM/PSMA6/CELF2/PSMA2/MED1/RPS27A/RPL12/YBX1/SRSF6/NCL/PSMA1/PSIP1/RBM39/HNRNPA1/TAF15/PUF60/HSPA1A/HSPA8/TRA2B/SF1/PABPC3/PSME2/SNRPG/RBM23/SRSF7/HNRNPA2B1/PSME1/HNRNPD/EDC4/HNRNPK/RPL30/PABPC4/RPS7/PABPN1/RPRD1B/HNRNPM/RNGTT/HSPA1B/TNRC6B/VIP/DDX39B/MAPK14/HNRNPF/PSMB4/APEX1/SNRPA/RBFOX2/SAP18/RPS4X/PSMD7/HSF1/YWHAB/RBM19/RBM17/SSB/POLR2J/GDNF/SNRPB2/SNRPD2/THOC1/FLNA/PSMA7/EIF4A3/RPS3/PSMD10/E…
GO_POSTTRANSCRIPTIONAL_REGULATION_OF_GENE_EXPRESSION	167	0.419297	1.89368	2.41435e-05	0.00956436	0.00832418	VIM/PSMA6/TGFB1/PSMA2/RPS27A/YBX1/ILF3/NCL/PSMA1/TAF15/HSPA1A/TNFRSF1B/HSPA8/PSME2/HNRNPA2B1/PSME1/IL6/HNRNPD/RPL30/PABPC4/HNRNPM/TNRC6B/VIP/DDX39B/BMP4/MAPK14/PSMB4/CALR/APEX1/CDC37/RPS4X/YBX2/PSMD7/MAPKAPK5/EIF4EBP2/TARBP2/YWHAB/GAPDH/POLR2J/FOXO3/GDNF/EIF5/PSMA7/GCNT2/EIF4E2/EIF4A3/RPS3/PSMD10/ELAVL1/NUP98/AGO3/CIRBP/THBS1/EXOSC8/SEC13/UBB/PURA/UBC/EIF5A/DHFR/AGO1/APP/PSMD11/YWHAZ/EIF4G2/PSME3…
SENESCENCE_ASSOCIATED_SECRETORY_PHENOTYPE_1	130	0.501607	2.19597	2.50451e-05	0.00956436	0.00832418	VIM/SOD1/HSP90AA1/HSP90AB1/NUCB1/CLEC11A/ARHGDIA/HSPA8/YWHAQ/LDHB/AKR1A1/STC1/ALDOA/AGRN/HNRNPA2B1/PSME1/TXNRD1/PEBP1/HSP90B1/GPI/PTX3/CXCL1/CALR/CST3/PARK7/GSTO1/IGFBP4/CTSD/TNC/GDF15/IGFBP2/TALDO1/HSPE1/PLOD3/YWHAB/C3/GAPDH/GSTP1/EZR/GDI2/HSPG2/HSPA5/MIF/HMGB1/FLNA/CTSB/UCHL1/PRKCSH/TAGLN2/PPIB/TPI1/THBS1/LGALS3BP/COL6A3/CTSZ/TKT/COL6A2/EIF4A1/MDH1/AKR1B1/PPIA/APP/PXDN/YWHAZ/HEXB/GLO1/PRDX6/TAG…
GO_RIBONUCLEOPROTEIN_COMPLEX	126	0.480113	2.09283	2.51439e-05	0.00956436	0.00832418	VIM/PSMA6/CELF2/G3BP2/RPS27A/RPL12/YBX1/G3BP1/ILF3/NCL/PSMA1/HNRNPA1/HSPA1A/HSPA8/TRA2B/SF1/EIF3G/PABPC3/SNRPG/HNRNPDL/RBM23/HNRNPAB/HNRNPA2B1/HNRNPD/SRA1/HNRNPK/RPL30/PABPC4/RPS7/PABPN1/HNRNPM/HSPA1B/DDX39B/MRPL34/MRPL52/HNRNPF/CALR/SNRPA/PES1/RPS4X/HSF1/TARBP2/GAPDH/RBM17/SSB/SNRPB2/SNRPD2/EIF4A3/RPS3/ELAVL1/PPIE/NUP98/AGO3/CIRBP/RPS5/MAGOHB/SRP14
GO_REGULATION_OF_MRNA_METABOLIC_PROCESS	99	0.481527	2.02926	2.6001e-05	0.00956436	0.00832418	VIM/PSMA6/CELF2/PSMA2/RPS27A/YBX1/SRSF6/NCL/PSMA1/HNRNPA1/TAF15/HSPA1A/HSPA8/TRA2B/PSME2/SRSF7/HNRNPA2B1/PSME1/HNRNPD/HNRNPK/PABPC4/PABPN1/HNRNPM/TNRC6B/VIP/MAPK14/PSMB4/APEX1/SNRPA/RBFOX2/SAP18/PSMD7/HSF1/YWHAB/RBM19/RBM17/GDNF/PSMA7/PSMD10/ELAVL1/NUP98/CIRBP/EXOSC8/UBB/UBC/PSMD11/YWHAZ/PSME3/YTHDC1/PRDX6
GO_NUCLEAR_EXPORT	53	0.546818	2.07136	2.78777e-05	0.00956436	0.00832418	TGFB1/SRSF6/HNRNPA1/NXT1/SRSF7/HNRNPA2B1/RANBP3/PABPN1/DDX39B/CALR/PARK7/IL1B/SSB/CHP1/THOC1/SMURF1/SFN/NXF1/EIF4A3/NUP98/HSPA9/SEC13/MAGOHB/PTPN11/EIF5A/AGFG1/YTHDC1/ANP32B/RAN
GO_POSITIVE_REGULATION_OF_RNA_METABOLIC_PROCESS	440	0.315692	1.5529	4.29516e-05	0.0103289	0.00898955	DCN/IL11/TGFB1/ASF1A/MED1/RPS27A/TGFB3/IL4/CD4/TBK1/YBX1/PGR/YEATS4/UBE2L3/BMP10/ILF3/MAFG/NCL/FGF4/NANOG/SHC1/ELK3/BRD4/ARID3A/TAF15/HSPA1A/TNFRSF1B/TRA2B/SUB1/XRCC6/ABL1/IFI16/IFNL1/MDK/WDR5/KAT2B/NR1D1/YWHAH/AGRN/IL18/HNRNPAB/HGF/FGF7/IL6/CCNA2/CHCHD10/HNRNPD/EDN1/SRA1/HNRNPK/ING1/SUMO2/SPP1/CHEK2/RPRD1B/CEBPA/CXCL10/TGFB2/TNRC6B/DDX39B/BMP4/DLL1/POMC/IRF4/MAPK14/FSTL3/APEX1/ID2/TNKS/PARK7/ASH…
GO_MYELOID_LEUKOCYTE_ACTIVATION	361	0.3421	1.66021	4.38356e-05	0.0103289	0.00898955	HMOX2/CTSG/HSP90AA1/PSMA2/HSP90AB1/MPO/IL4/TSLP/FCAR/HSPA1A/TNFRSF1B/HSPA8/OLFM4/CSF1/XRCC6/SERPINA3/LBP/NR1D1/ALDOA/B4GALT1/CD14/PLA2G10/IL18/PAFAH1B2/HAVCR2/IL1RL1/IL6/LCN2/TXNDC5/KCNAB2/B2M/PRTN3/CEBPA/ELANE/PYGL/S100A12/PTPN6/HSPA1B/GPI/PTX3/CXCL1/CD226/NPPA/IRF4/MAPK14/CRISP3/CD200/PRSS2/CST3/CST7/CTSD/FTL/PECAM1/FCGR3B/PRDX4/SERPINB1/GRN/GNS/PSMD7/LTA4H/ASAH1/CD47/BATF/CXCL8/AP2A2/PRSS3/C3/…
GO_MYELOID_LEUKOCYTE_MEDIATED_IMMUNITY	298	0.343742	1.6446	4.47878e-05	0.0103289	0.00898955	HMOX2/CTSG/HSP90AA1/PSMA2/HSP90AB1/MPO/FCAR/HSPA1A/TNFRSF1B/HSPA8/OLFM4/XRCC6/SERPINA3/ALDOA/B4GALT1/CD14/PAFAH1B2/IL6/LCN2/TXNDC5/KCNAB2/B2M/PRTN3/ELANE/PYGL/S100A12/PTPN6/HSPA1B/GPI/PTX3/CXCL1/NPPA/MAPK14/CRISP3/PRSS2/CST3/CTSD/FTL/PECAM1/FCGR3B/PRDX4/SERPINB1/GRN/GNS/PSMD7/LTA4H/ASAH1/CD47/AP2A2/PRSS3/C3/ANPEP/IMPDH1/ANXA2/GSTP1/PLAUR/GM2A/CHI3L1/CAT/LILRB2/GDI2/KRT1/PIGR/RNASE2/LYZ/MIF/CAB39/…
GO_DNA_METABOLIC_PROCESS	224	0.376681	1.75603	4.64608e-05	0.0103289	0.00898955	HSP90AA1/TGFB1/ASF1A/MBD4/HSP90AB1/RPS27A/IL4/LONP1/XRCC4/HNRNPA1/UBQLN4/XRCC6/ABL1/SSRP1/ISG15/DNASE1L2/HNRNPA2B1/HGF/IL7R/IL6/POLE3/HNRNPD/SMC3/GLRX2/PCNA/GJA1/RECQL/CHEK2/MPG/KIF22/DDX39B/GNAS/APEX1/TNKS/PARK7/RNF8/ADPRHL2/FGFR4/HSF1/MAPKAPK5/CDKN1A/RAD23A/BATF/RAD23B/FOXM1/RBM17/NUDT16L1/SETMAR/POLR2J/CD40LG/FH/CHEK1/THOC1/HMGB1/GREM1/CUL4B/HMGA2/RPS3/DCTPP1/PPIE/TOP1/PIAS4/TDP1/SWAP70/UBB/PR…
GO_VESICLE_LUMEN	224	0.369277	1.72152	4.64608e-05	0.0103289	0.00898955	CTSG/HSP90AA1/TGFB1/PSMA2/HSP90AB1/MPO/TGFB3/VEGFC/HSPA8/OLFM4/XRCC6/SERPINA3/FAM49B/VWF/ALDOA/ITIH4/PAFAH1B2/HGF/SRGN/LCN2/ITIH3/TXNDC5/B2M/PRTN3/ELANE/PYGL/TGFB2/S100A12/PTPN6/GPI/PTX3/CXCL1/POMC/MAPK14/CRISP3/PRSS2/PCYOX1L/CTSD/FTL/GHRL/PRDX4/SERPINB1/GRN/GNS/PRSS57/PSMD7/PLG/C3/VTI1B/IMPDH1/ANXA2/GSTP1/GM2A/CHI3L1/CAT/GDI2/RNASE2/LYZ/MIF/CAB39/HMGB1/OLA1/F5/SERPINA1/FGG/F8/COMMD9/S100A9/PPIE/…
GO_SEQUENCE_SPECIFIC_DNA_BINDING	187	0.382755	1.75165	4.75556e-05	0.0103289	0.00898955	BCL2/MBD4/MED1/YBX1/RBBP4/PGR/ERH/MAFG/NCL/LONP1/NANOG/HNRNPA1/ELK3/ARID3A/SUB1/XRCC6/ABL1/IFI16/ZNF329/HNRNPDL/KAT2B/NR1D1/HNRNPAB/HNRNPA2B1/HNRNPD/HNRNPK/LMNB1/CEBPA/IRF4/APEX1/STAT1/NR5A2/JUND/TBP/HSF1/BATF/RAD23B/GMEB2/FOXM1/PAX4/FOXO3/MUC1/TOX3/RUNX3/MNX1/MAX/ZNF175/IRF9/ZNF10/HMGA2/RPS3/HDAC2/BPTF/MAZ/TEAD4/SNAI2/PURB/TOP1/CREB3L2/CREBBP/PURA/IRF3/HSPD1/IRF6/AGO1/HMGB2/ELK1/TERF1/CEBPG/NR1D2
GO_CELLULAR_NITROGEN_COMPOUND_CATABOLIC_PROCESS	183	0.395932	1.80793	4.76679e-05	0.0103289	0.00898955	VIM/PSMA6/HMOX2/MBD4/PSMA2/RPS27A/RPL12/YBX1/UPP1/PSMA1/DUT/TAF15/HSPA1A/TNFRSF1B/HSPA8/HINT1/PSME2/PDE1A/DNASE1L2/PSME1/IL6/PDE7A/HNRNPD/EDC4/RPL30/PABPC4/RPS7/HNRNPM/NUDT9/HSPA1B/TNRC6B/VIP/NUDT5/MAPK14/PSMB4/APEX1/HPRT1/RPS4X/PSMD7/HSF1/KYNU/PDXP/YWHAB/RNASE6/TYMP/SSB/SETMAR/NUDT3/GDNF/POR/RNASE2/HMGB1/CNP/PSMA7/EIF4A3/RPS3/PSMD10/BLVRA/ELAVL1/DCTPP1/AGO3/CIRBP/RPS5/EXOSC8/MAGOHB/HMOX1/UBB/SMP…
GO_CELLULAR_RESPONSE_TO_HEAT	51	0.552806	2.07839	5.59738e-05	0.0109219	0.00950571	HSP90AA1/HSP90AB1/HSPA1A/HSPA8/PTGS2/CAMK2A/HTRA2/BAG4/CXCL10/FKBP4/HSPA1B/HSF1/CDKN1A/CAMK2B/CAMK2D/DNAJB6/HSPA5/HDAC2/NUP98/HSPH1/DNAJB1/THBS1/HSPA9/SEC13/CREBBP/HMOX1
GO_INTRINSIC_APOPTOTIC_SIGNALING_PATHWAY_IN_RESPONSE_TO_DNA_DAMAGE	44	0.590638	2.15786	5.6899e-05	0.0109219	0.00950571	BCL2/TNFRSF1B/ABL1/IFI16/HTRA2/HNRNPK/MCL1/CHEK2/BID/TPT1/CDKN1A/TNFRSF1A/CXCL12/BAD/MUC1/MIF/SFN/RPS3/CASP2/SNAI2/PIAS4/HMOX1/EPHA2
GO_MRNA_TRANSPORT	35	0.5989	2.08462	5.83635e-05	0.0109219	0.00950571	G3BP2/SRSF6/HNRNPA1/NXT1/SRSF7/HNRNPA2B1/PABPN1/DDX39B/TNKS/HSF1/PARP11/CETN3/THOC1/NXF1/EIF4A3/NUP98/SEC13/MAGOHB/EIF5A/AGFG1/YTHDC1/EIF5A2/FMR1
GO_CELL_ACTIVATION_INVOLVED_IN_IMMUNE_RESPONSE	377	0.32947	1.60396	6.54679e-05	0.0117188	0.0101992	PRKCZ/HMOX2/CTSG/HSP90AA1/TGFB1/PSMA2/HSP90AB1/MPO/IL4/FCAR/HSPA1A/TNFRSF1B/HSPA8/OLFM4/XRCC6/SERPINA3/ABL1/IFNL1/MDK/LBP/ALDOA/B4GALT1/CD14/IL18/PAFAH1B2/HAVCR2/IL6/LCN2/TXNDC5/KCNAB2/B2M/PRTN3/ELANE/PYGL/S100A12/PTPN6/HSPA1B/GPI/PTX3/CXCL1/DLL1/NPPA/IRF4/MAPK14/CRISP3/PRSS2/CST3/RNF8/CTSD/FTL/PECAM1/FCGR3B/PRDX4/SERPINB1/GRN/GNS/PSMD7/LTA4H/ASAH1/CD47/BATF/AP2A2/PRSS3/C3/ANPEP/IMPDH1/ANXA2/GSTP…
GO_APOPTOTIC_SIGNALING_PATHWAY	255	0.347431	1.63934	6.8537e-05	0.0117569	0.0102324	SOD1/BCL2/FAM162A/TGFB1/BDNF/GABARAP/HSPA1A/GZMH/TNFRSF1B/YWHAQ/PTGS2/TNFRSF10B/HINT1/ABL1/IFI16/YWHAH/CD14/HGF/SRGN/LCN2/CHCHD10/HTRA2/HNRNPK/MCL1/RPS7/PDCD5/CHEK2/SGK3/FGFR3/INHBB/GZMB/TGFB2/HSPA1B/BID/BMP4/TNFSF10/TPT1/LCK/PARK7/PTPN2/DIDO1/EDA2R/CSNK2A1/CDKN1A/IL1B/YWHAB/SFRP1/TNFRSF1A/GSTP1/RNF41/CXCL12/PLAUR/PPP3R1/GDNF/BAD/MUC1/MIF/SFN/LGALS9/STX4/FGG/TNFRSF10A/CSNK2A2/RPS3/PSMD10/BRSK2/MA…
GO_MRNA_PROCESSING	104	0.436609	1.85249	7.75114e-05	0.012114	0.0105432	CELF2/YBX1/SRSF6/NCL/PSIP1/RBM39/HNRNPA1/PUF60/HSPA8/TRA2B/SF1/SNRPG/RBM23/SRSF7/HNRNPA2B1/HNRNPD/HNRNPK/PABPN1/RPRD1B/HNRNPM/RNGTT/DDX39B/HNRNPF/SNRPA/RBFOX2/SAP18/HSF1/RBM19/RBM17/POLR2J/SNRPB2/SNRPD2/THOC1/EIF4A3/ELAVL1/PPIE/NUP98/CIRBP/MAGOHB/CCNH/SMNDC1
GO_RNA_SPLICING_VIA_TRANSESTERIFICATION_REACTIONS	74	0.481272	1.93792	8.05412e-05	0.012114	0.0105432	CELF2/YBX1/SRSF6/NCL/PSIP1/HNRNPA1/PUF60/HSPA8/TRA2B/SF1/SNRPG/SRSF7/HNRNPA2B1/HNRNPD/HNRNPK/PABPN1/HNRNPM/DDX39B/HNRNPF/SNRPA/RBFOX2/SAP18/RBM19/RBM17/POLR2J/SNRPB2/SNRPD2/EIF4A3/ELAVL1/PPIE/NUP98/CIRBP/MAGOHB
GO_POSITIVE_REGULATION_OF_MITOCHONDRION_ORGANIZATION	48	0.549241	2.03975	8.46334e-05	0.012114	0.0105432	BCL2/DCN/FAM162A/UBE2L3/YWHAQ/YWHAH/CHCHD10/HTRA2/PDCD5/GZMB/BID/TNFSF10/PARK7/CDC37/YWHAB/PLAUR/PPP3R1/BAD/SMURF1/SFN/HK2/CSNK2A2
GO_NUCLEOBASE_CONTAINING_COMPOUND_TRANSPORT	44	0.551964	2.01656	8.53485e-05	0.012114	0.0105432	G3BP2/SRSF6/HNRNPA1/NXT1/SRSF7/HNRNPA2B1/GJA1/PABPN1/DDX39B/TNKS/HSF1/PARP11/CETN3/SSB/THOC1/NXF1/EIF4A3/NUP98/SEC13/MAGOHB/PURA/EIF5A/AGFG1/YTHDC1/RAN/EIF5A2/FMR1
GO_ESTABLISHMENT_OF_RNA_LOCALIZATION	44	0.548806	2.00503	8.53485e-05	0.012114	0.0105432	G3BP2/SRSF6/HNRNPA1/NXT1/SRSF7/HNRNPA2B1/PABPN1/DDX39B/TNKS/HSF1/PARP11/CETN3/SSB/THOC1/NXF1/EIF4A3/NUP98/SEC13/MAGOHB/PURA/EIF5A/AGFG1/TERF1/YTHDC1/RAN/EIF5A2/FMR1
GO_PEPTIDE_BIOSYNTHETIC_PROCESS	146	0.399154	1.77358	9.8464e-05	0.012114	0.0105432	VIM/RPS27A/RPL12/ILF3/NCL/EIF3G/FURIN/RRBP1/IL6/HNRNPD/RPL30/PABPC4/RPS7/ELANE/EIF1AX/BDH2/TNRC6B/DDX39B/MRPL34/MRPL52/CALR/GSS/RPS4X/YBX2/MAPKAPK5/EIF4EBP2/EIF1AD/TARBP2/GAPDH/FOXO3/EIF5/DENR/EIF4E2/EIF4A3/RPS3/ELAVL1/PPA1/EEF1B2/AGO3/CIRBP/RPS5/THBS1/PURA/EIF4A1/EIF5A/DHFR/AGO1/APP/EIF4G2/GCLM/SARS2/CNDP2/MRPL33/RHOA/EIF5A2/FMR1/TYMS/RPS19/EIF1AY/EIF2S1/RPS3A/HABP4/STAT3/EIF4B/MTRF1L/PPA2/ERBB2…
GO_RESPONSE_TO_INTERFERON_GAMMA	100	0.429266	1.81193	0.000103853	0.012114	0.0105432	VIM/FCGR1A/MED1/HSP90AB1/CCL20/XCL1/CAMK2A/HLA-G/EDN1/B2M/CCL23/STX8/IRF4/CCL7/CCL13/STAT1/CDC37/PTPN2/KYNU/CD47/CXCL16/CAMK2B/NMI/GBP1/GAPDH/CAMK2D/MRC1/CCL14/CCL2/IL12RB1/LGALS9/STX4/IRF9/CCL24/CCL3/IL23R/GBP2/IRF3/CCL15/IRF6/CCL26/GCH1
GO_REGULATION_OF_POSTSYNAPTIC_SPECIALIZATION_ASSEMBLY	12	-0.782152	-2.2648	0.000105263	0.012114	0.0105432	IL1RAP/PTPRS/LRRTM2/GRID2/CBLN1/NTRK3/PTPRD/LRFN1
GO_SIGNAL_TRANSDUCTION_BY_P53_CLASS_MEDIATOR	78	0.473989	1.92456	0.000106875	0.012114	0.0105432	BCL2/RBBP4/ARID3A/TAF15/HINT1/IFI16/SSRP1/RBL2/HNRNPK/RPS7/PCNA/CHEK2/MAPK14/TBP/EDA2R/MAPKAPK5/CSNK2A1/CDKN1A/BATF/FOXM1/CHEK1/MUC1/MIF/SFN/CSNK2A2/PSMD10/HDAC2/SPRED1/CASP2/SNAI2/UBB/HEXIM1/BRPF1
GO_TRIGLYCERIDE_RICH_PLASMA_LIPOPROTEIN_PARTICLE	14	-0.744557	-2.27281	0.000106889	0.012114	0.0105432	APOH/APOB/APOA4/APOC1/PCYOX1/APOA1/VLDLR/APOM
GO_POSITIVE_REGULATION_OF_CELL_POPULATION_PROLIFERATION	441	0.310453	1.52737	0.000107335	0.012114	0.0105432	PRKCZ/BCL2/CLEC7A/IL11/GDF9/TGFB1/MED1/FGF5/TGFB3/IL4/CD4/TSLP/CLEC11A/SRSF6/BMP10/VEGFC/FGF4/NANOG/SHC1/PTGS2/FGF16/CSF1/MATK/CAPNS1/ABL1/MDK/IL24/ADAMTS1/XCL1/B4GALT1/GLUL/IL18/HAVCR2/IL7R/FGF7/IL6/CCNA2/STAMBP/FGF8/EDN1/ESM1/GJA1/RPRD1B/FGFR3/PRTN3/AREG/CXCL10/ELANE/TGFB2/PTPN6/VIP/DDX39B/BMP4/DLL1/NTN1/MAPK14/STX3/CALR/PTN/ID2/CRKL/PRKCI/ASH2L/STAT1/FGF20/HTRA1/REG3A/FGFBP1/RPS4X/GHRL/FGFR4/E…
GO_EXOCYTOSIS	440	0.307947	1.5148	0.000107379	0.012114	0.0105432	SOD1/HMOX2/CTSG/HSP90AA1/TGFB1/PSMA2/HSP90AB1/MPO/TGFB3/VEGFC/FCAR/HSPA1A/TNFRSF1B/HSPA8/OLFM4/XRCC6/SERPINA3/FAM49B/VWF/ALDOA/B4GALT1/CD14/ITIH4/TMX3/PAFAH1B2/HGF/SRGN/LCN2/ITIH3/CYB5R1/TXNDC5/KCNAB2/B2M/RALA/PRTN3/ELANE/PYGL/TGFB2/S100A12/PTPN6/HSPA1B/GPI/PTX3/CXCL1/NPPA/MAPK14/STX3/CRISP3/PRSS2/CST3/PCYOX1L/CTSD/APLP2/FTL/PECAM1/FCGR3B/SYT17/PRDX4/SERPINB1/LIN7A/GRN/GNS/PSMD7/PLG/LTA4H/ASAH1/C…
GO_MRNA_BINDING	66	0.495606	1.95733	0.00010887	0.012114	0.0105432	CELF2/G3BP2/G3BP1/ILF3/NCL/HNRNPA1/TAF15/TRA2B/PABPC3/HNRNPAB/HNRNPA2B1/HNRNPD/RPL30/PABPC4/RPS7/HNRNPM/CALR/PARK7/RBFOX2/SSB/DENR/NXF1/EIF4A3/RPS3/ELAVL1/PPIE/NUP98/PURB/CIRBP/RPS5/EXOSC8/EIF4A1/DHFR/EIF4G2/FMR1/TYMS/SLPI/RPS3A
GO_REGULATION_OF_MRNA_PROCESSING	34	0.590779	2.04332	0.000117058	0.0123373	0.0107375	CELF2/SRSF6/NCL/HNRNPA1/TRA2B/SRSF7/HNRNPA2B1/HNRNPK/PABPN1/SNRPA/RBFOX2/SAP18/HSF1/RBM19/RBM17
GO_CYTOKINE_ACTIVITY	176	0.375595	1.70729	0.000119706	0.0123373	0.0107375	IL11/GDF9/TGFB1/CCL27/TGFB3/IL4/TSLP/BMP10/IL17D/CSF1/IFNL1/CCL20/IL24/XCL1/IL18/IL6/IFNL2/IL1RN/GDF5/EDN1/SPP1/CCL23/INHBB/AREG/CXCL10/TGFB2/GPI/IL36B/CXCL1/BMP4/TNFSF10/CCL7/CXCL11/CCL13/TNFSF15/CXCL14/GRN/CXCL13/GDF15/CXCL8/IL1B/CXCL16/CXCL12/CCL14/CCL2/CD40LG/IL22/MIF/CXCL5/HMGB1/GREM1/IL15/CCL24/CCL3/IL20/THPO/BMP6/VEGFA/CXCL9/NAMPT/IFNA6/CCL28/CCL15/IL1F10/SECTM1/CCL26
GO_NUCLEOLUS	175	0.3741	1.69927	0.000119867	0.0123373	0.0107375	MED1/NOP16/RPS27A/RPL12/ILF3/NCL/NANOG/HSPA8/SUB1/XRCC6/ABL1/IFI16/SSRP1/EWSR1/PAFAH1B2/TXNRD1/RBL2/RPS7/FGF22/HNRNPM/CEBPA/CAPG/PTPN6/APEX1/PES1/RBBP5/STAT1/SBDS/CDKN1A/TAX1BP3/RBM19/SDCBP2/CETN3/SETMAR/KIAA0319L/USO1/CA9/EZR/SNRPB2/RUNX3/MNX1/OLA1/FLNA/CTSB/REXO2/NAA10/EIF4A3/FGF18/RPS3/NCF2/PIN4/SPRN/UBLCP1/CMPK1/TOP1/DNAJB1/HSPA9/ACAT2/EXOSC8/HMOX1/UBE2T/EDF1/CUTC/HMGB2/TERF1/VRK1/ANP32B/RAN/…
GO_PROTEIN_FOLDING	109	0.416209	1.77839	0.000153933	0.015235	0.0132595	HSP90AA1/DNAJC19/HSP90AB1/PFDN2/HSPA1A/HSPA8/PDIA4/NUDC/DNAJB2/GRPEL1/PDCD5/BAG4/FKBP4/HSP90B1/HSPA1B/NUDCD3/NPPA/CALR/CDC37/PFDN1/PRDX4/GRN/CSNK2A1/RAD23B/HSPE1/DNAJB6/ENGASE/PDIA6/HSPA5/CSNK2A2/AIP/PPIE/PRKCSH/NPPB/ST13/PPIB/PFDN5/HSPH1/DNAJB1/HSPA9/HSPD1/PPIA/ERP44/DNAJB11/PDRG1/HSPA13/PDILT/TCP1/DNAJA4/DNAJB4/ERP29/CCT8/TBCA/DNAJA2/TBCE
GO_FICOLIN_1_RICH_GRANULE	83	0.452647	1.85757	0.000159143	0.015235	0.0132595	HSP90AA1/PSMA2/HSP90AB1/HSPA1A/HSPA8/XRCC6/ALDOA/PAFAH1B2/PYGL/HSPA1B/GPI/MAPK14/CST3/CTSD/PRDX4/GNS/PSMD7/LTA4H/ASAH1/IMPDH1/GSTP1/CAT/KRT1/MIF/CAB39/HMGB1/SERPINA1/CTSB/PDAP1/COMMD9/PPIE/GMFG/SRP14/CTSZ/PPIA/PSMD11/ARSB
GO_REGULATION_OF_MITOCHONDRION_ORGANIZATION	70	0.473926	1.89101	0.000161795	0.015235	0.0132595	BCL2/DCN/FAM162A/UBE2L3/HSPA1A/YWHAQ/YWHAH/HGF/CHCHD10/HTRA2/PDCD5/BAG4/GZMB/BID/TNFSF10/PARK7/CDC37/YWHAB/RNF41/PLAUR/PPP3R1/BAD/SMURF1/SFN/HK2/CSNK2A2/PSMD10
GO_PROTEIN_CONTAINING_COMPLEX_LOCALIZATION	67	0.465073	1.84134	0.000162822	0.015235	0.0132595	PRKCZ/SRSF6/NXT1/SRSF7/HNRNPA2B1/NETO1/PABPN1/DYNLL2/FKBP4/DDX39B/STX3/SYNJ2BP/MX1/SSB/EZR/DLG2/ATAD1/STX7/THOC1/NXF1/EIF4A3/GPC6/NUP98/SEC13/MAGOHB/PURA/DAG1/EIF5A/AGFG1/TERF1/YTHDC1/RAN
GO_RECEPTOR_REGULATOR_ACTIVITY	372	0.31541	1.53385	0.000174821	0.0159942	0.0139203	IL11/GDF9/TGFB1/BDNF/CCL27/FGF12/FGF5/TGFB3/IL4/TSLP/CLEC11A/HDGF/BMP10/IL17D/VEGFC/FGF4/FGF16/CSF1/IFNL1/MDK/CCL20/IL24/ANGPT4/STC1/UTS2B/XCL1/SEMA3A/IL18/HGF/FGF7/IL6/IFNL2/IL1RN/FGF8/GDF5/EDN1/FGF22/SPP1/SAA1/NTF4/CCL23/INHBB/AREG/CXCL10/TGFB2/GPI/IL36B/CXCL1/VIP/BMP4/POMC/TNFSF10/NPPA/PTN/SAA2/CCL7/CXCL11/CCL13/FGF20/TNFSF15/CXCL14/FST/HAMP/GHRL/GRN/CXCL13/GDF15/CXCL8/IL1B/CXCL16/REG1A/TYMP/L…
GO_REGULATION_OF_MRNA_SPLICING_VIA_SPLICEOSOME	26	0.622688	2.02358	0.000181703	0.0162624	0.0141537	CELF2/SRSF6/NCL/HNRNPA1/TRA2B/SRSF7/HNRNPA2B1/HNRNPK/RBFOX2/SAP18/RBM19/RBM17/NUP98/CIRBP/YTHDC1/PRDX6/FMR1
GO_POSITIVE_REGULATION_OF_NUCLEOBASE_CONTAINING_COMPOUND_METABOLIC_PROCESS	490	0.299338	1.48197	0.00019129	0.0166821	0.0145189	DCN/IL11/HSP90AA1/TGFB1/ASF1A/MED1/HSP90AB1/RPS27A/TGFB3/IL4/CD4/TBK1/YBX1/PGR/YEATS4/UBE2L3/BMP10/ILF3/MAFG/NCL/FGF4/NANOG/SHC1/HNRNPA1/ELK3/BRD4/ARID3A/TAF15/HSPA1A/TNFRSF1B/TRA2B/SUB1/XRCC6/ABL1/IFI16/IFNL1/MDK/WDR5/KAT2B/NR1D1/YWHAH/AGRN/IL18/HNRNPAB/HNRNPA2B1/HGF/FGF7/IL6/CCNA2/CHCHD10/HNRNPD/EDN1/SRA1/HNRNPK/ING1/SUMO2/PCNA/SPP1/CHEK2/RPRD1B/CEBPA/CXCL10/TGFB2/TNRC6B/DDX39B/BMP4/DLL1/POMC/I…
GO_CELLULAR_RESPONSE_TO_DRUG	159	0.382086	1.71578	0.000194496	0.0166821	0.0145189	VIM/SOD1/HSP90AB1/HNRNPA1/PTGS2/ABL1/AGRN/HGF/IL6/LCN2/CCNA2/HNRNPD/EDN1/PCNA/B2M/CHEK2/ADAM15/HSP90B1/ALK/GNAS/APEX1/CRKL/NTRK1/PARK7/RHOB/CRK/HSF1/IL1B/PDXP/SFRP1/MAP1LC3A/QDPR/BAD/MAP4K1/HSPA5/FLNA/NET1/ANXA1/FOLR2/IL18RAP/HMGA2/RPS3/HDAC2/PTEN/PDGFD/CBX3/HMOX1
GO_GROWTH_FACTOR_ACTIVITY	127	0.397774	1.73624	0.000200813	0.0168724	0.0146846	IL11/GDF9/TGFB1/BDNF/FGF12/FGF5/TGFB3/IL4/CLEC11A/HDGF/BMP10/VEGFC/FGF4/FGF16/CSF1/MDK/HGF/FGF7/IL6/FGF8/GDF5/FGF22/NTF4/INHBB/AREG/TGFB2/GPI/CXCL1/BMP4/PTN/FGF20/GRN/GDF15/REG1A/TYMP/CXCL12/GDNF/GFER/JAG1/EFEMP1/FGF18/FGF6/JAG2/PDGFD/OGN/THPO/BMP6/VEGFA/GMFG
GO_CELL_CYCLE	454	0.30117	1.48476	0.000213922	0.0172123	0.0149804	PSMA6/BCL2/HSP90AA1/TGFB1/ANAPC10/PSMA2/MED1/HSP90AB1/RBBP4/CGREF1/YEATS4/UBE2L3/APBB2/ERH/PSMA1/UBE2E1/BRD4/ARID3A/HSPA1A/PTGS2/DUSP3/PSME2/ABL1/ADAMTS1/KAT2B/CAMK2A/MAPK12/HLA-G/HGF/PSME1/NUDC/POLE3/RBL2/CCNA2/STAMBP/HTRA2/FGF8/CLTA/EDN1/ING1/SMC3/PBRM1/PCNA/GJA1/RALA/CHEK2/RPRD1B/LCMT1/KIF22/CEBPA/TGFB2/TMPRSS11A/PTPN6/HSPA1B/BID/DDX39B/BMP4/MAPK14/PSMB4/DYNLT3/CALR/APEX1/PES1/ID2/PCNP/TNKS/CD…
GO_PROTEIN_FOLDING_CHAPERONE	18	0.679231	2.01578	0.000219106	0.0172123	0.0149804	HSP90AA1/HSP90AB1/PFDN2/HSPA1A/HSPA8/HSPA1B/CALR/PFDN1/HSPA5/DNAJB1/HSPA9
GO_INTRACELLULAR_PROTEIN_TRANSPORT	331	0.317618	1.5314	0.000221494	0.0172123	0.0149804	HSP90AA1/TGFB1/DNAJC19/MED1/RPS27A/GABARAP/RPL12/NUCB1/SRSF6/UBE2L3/NXT1/HSPA8/YWHAQ/PTGS2/YWHAH/SRSF7/HNRNPA2B1/GRPEL1/HTRA2/CLTA/RANBP3/RPL30/RPS7/PDCD5/SCARB2/VPS26A/PABPN1/DYNLL2/BAG4/STX8/HSP90B1/BID/DDX39B/BMP4/MAPK14/STX3/CALR/PRKCI/PARK7/CDC37/STX12/RHOB/RPS4X/SYNJ2BP/GGA1/CDKN1A/AP2A2/ERLEC1/IL1B/VPS25/YWHAB/VTI1B/SSB/ARL6/RTP4/USO1/NAPA/CAT/CHP1/DLG2/ADPRH/STX7/THOC1/SMURF1/HSPA5/SFN/FL…
GO_ALTERNATIVE_MRNA_SPLICING_VIA_SPLICEOSOME	16	0.704913	2.02562	0.000221582	0.0172123	0.0149804	CELF2/SRSF6/HNRNPA1/TRA2B/SRSF7/HNRNPM/RBFOX2/SAP18/RBM19/RBM17
GO_CELL_SUBSTRATE_JUNCTION	187	0.35899	1.64289	0.000237778	0.0179451	0.0156182	VIM/RPL12/BSG/G3BP1/HSPA1A/HSPA8/YWHAQ/SCARF2/IL1RL1/HNRNPK/RPL30/LAP3/RPS7/FLRT1/SCARB2/GJA1/B2M/RALA/LAYN/FGFR3/HSP90B1/HSPA1B/CALR/FLII/KIF23/RHOB/RDX/RPS4X/MPZL1/TNC/YWHAB/YES1/AIF1L/PLAUR/EZR/CAT/CHP1/SYNE2/GDI2/HSPG2/HSPA5/FLNA/TNS2/TWF1/ANXA1/NEDD9/PARVA/REXO2/RPS3/ARPC1B/PPIB/RPS5/HSPA9/ACTN2/DAG1/FLT1/EPHA2/TGM2/PPIA/YWHAG/YWHAZ/TNS4/CAV3/ENAH/PDCD6IP/ITGB7/RHOA/RPS19/CLTC/CAPN2/RPS3A/MA…
GO_REGULATION_OF_APOPTOTIC_SIGNALING_PATHWAY	175	0.364442	1.65539	0.000239733	0.0179451	0.0156182	SOD1/BCL2/FAM162A/BDNF/HSPA1A/YWHAQ/PTGS2/TNFRSF10B/YWHAH/HGF/CHCHD10/HTRA2/HNRNPK/MCL1/RPS7/PDCD5/SGK3/INHBB/GZMB/HSPA1B/BID/BMP4/TNFSF10/TPT1/LCK/PARK7/PTPN2/CSNK2A1/IL1B/YWHAB/SFRP1/GSTP1/CXCL12/PLAUR/PPP3R1/GDNF/BAD/MUC1/MIF/SFN/LGALS9/STX4/FGG/TNFRSF10A/CSNK2A2/RPS3/PSMD10/MAZ/S100A9/CASP2/SNAI2/PTEN/THBS1/PIAS4/HMOX1/UBB/PEA15/HMGB2/YWHAG/TXNDC12/YWHAZ/PSME3/GCLM
GO_DNA_REPAIR	120	0.395146	1.71193	0.000252736	0.0185102	0.01611	ASF1A/MBD4/RPS27A/XRCC4/UBQLN4/XRCC6/ABL1/SSRP1/ISG15/SMC3/PCNA/RECQL/CHEK2/MPG/KIF22/APEX1/PARK7/RNF8/ADPRHL2/HSF1/RAD23A/RAD23B/FOXM1/RBM17/NUDT16L1/SETMAR/POLR2J/FH/CHEK1/HMGB1/CUL4B/HMGA2/RPS3/PPIE/PIAS4/TDP1/UBB/CCNH/UBC/UBE2V1/NUDT1/UBE2T/POLM/HMGB2/CEBPG
GO_POSITIVE_REGULATION_OF_RELEASE_OF_CYTOCHROME_C_FROM_MITOCHONDRIA	13	0.737845	2.00409	0.000256748	0.0185102	0.01611	FAM162A/CHCHD10/PDCD5/BID/TNFSF10/PLAUR/BAD
GO_CELL_CHEMOTAXIS	174	0.362851	1.64765	0.000263681	0.0185102	0.01611	CCL27/JAM3/VEGFC/FGF4/FGF16/CSF1/MDK/CCL20/LBP/XCL1/HGF/IL6/IL1RN/EDN1/SAA1/CCL23/CXCL10/TGFB2/S100A12/IL36B/CXCL1/MAPK14/CALR/PTN/SAA2/CCL7/CXCL11/CRKL/CCL13/CXCL14/CRK/CXCL13/SBDS/CXCL8/IL1B/CXCL16/GSTP1/CXCL12/CCL14/CCL2/MIF/CXCL5/HMGB1/LGALS9/GREM1/ANXA1/PARVA/FGF18/CCL24/CCL3/S100A9/PDGFD/THBS1/VEGFA/CXCL9/SWAP70/PRKCQ/CCL28/NBL1/CCL15/LGMN/FLT1/IL1F10/EPHA2/CCL26/CSF3R/RARRES2/HMGB2/VAV1
GO_POSITIVE_REGULATION_OF_APOPTOTIC_SIGNALING_PATHWAY	82	0.446639	1.82947	0.000265266	0.0185102	0.01611	SOD1/BCL2/FAM162A/YWHAQ/YWHAH/CHCHD10/HTRA2/MCL1/RPS7/PDCD5/INHBB/GZMB/BID/TNFSF10/LCK/PARK7/PTPN2/YWHAB/SFRP1/PLAUR/PPP3R1/BAD/SFN/LGALS9/RPS3/S100A9/CASP2/PTEN/THBS1/PIAS4/UBB/PEA15/YWHAG/YWHAZ
GO_INTRACELLULAR_TRANSPORT	487	0.29619	1.46577	0.00027656	0.0186916	0.0162679	SOD1/PRKCZ/HSP90AA1/TGFB1/DNAJC19/MED1/RPS27A/GABARAP/RPL12/NUCB1/SRSF6/UBE2L3/PSIP1/HNRNPA1/NXT1/HSPA8/YWHAQ/PTGS2/SNRPG/DPY30/YWHAH/SRSF7/HNRNPA2B1/TRAPPC4/GRPEL1/HTRA2/CLTA/RANBP3/RPL30/RPS7/PDCD5/SCARB2/VPS26A/PABPN1/DYNLL2/BAG4/STX8/AREG/CAPZA1/HSP90B1/BID/DDX39B/BMP4/NTN1/NPPA/MAPK14/STX3/CALR/PRKCI/PARK7/CDC37/DCTN6/ANXA8/STX12/LMAN2/KIF23/RHOB/RDX/RPS4X/SYNJ2BP/PROC/GGA1/CDKN1A/TINAGL1/NE…
GO_PROTEIN_LIPID_COMPLEX_ASSEMBLY	18	-0.636606	-2.0954	0.000276947	0.0186916	0.0162679	APOC3/BMP1/APOB/APOA4/APOC1/APOA1/APOM
GO_INTRINSIC_APOPTOTIC_SIGNALING_PATHWAY	109	0.406479	1.73682	0.000307866	0.0199388	0.0173534	SOD1/BCL2/HSPA1A/TNFRSF1B/PTGS2/TNFRSF10B/HINT1/ABL1/IFI16/HTRA2/HNRNPK/MCL1/RPS7/CHEK2/BID/TPT1/LCK/PARK7/PTPN2/EDA2R/CDKN1A/TNFRSF1A/CXCL12/PLAUR/BAD/MUC1/MIF/SFN/RPS3/BRSK2/S100A9/CASP2/SNAI2/PIAS4/HMOX1/UBB
GO_REGULATION_OF_CELL_CYCLE	336	0.31475	1.51997	0.000309037	0.0199388	0.0173534	PSMA6/BCL2/HSP90AA1/TGFB1/ANAPC10/PSMA2/MED1/HSP90AB1/RBBP4/CGREF1/APBB2/PSMA1/UBE2E1/BRD4/ARID3A/HSPA1A/PTGS2/DUSP3/PSME2/ABL1/ADAMTS1/KAT2B/MAPK12/HLA-G/PSME1/RBL2/CCNA2/HTRA2/FGF8/EDN1/SMC3/PCNA/CHEK2/RPRD1B/LCMT1/CEBPA/TGFB2/PTPN6/HSPA1B/BID/DDX39B/BMP4/MAPK14/PSMB4/DYNLT3/CALR/APEX1/PES1/ID2/TNKS/CDC37/JUND/KIF23/RHOB/RDX/PSMD7/HSF1/CSNK2A1/CDKN1A/RAD23A/CXCL8/SKP1/IL1B/PDXP/SFRP1/FOXM1/SETM…
GO_DOUBLE_STRANDED_DNA_BINDING	170	0.361455	1.63572	0.000313261	0.0199388	0.0173534	MBD4/MED1/YBX1/RBBP4/PGR/MAFG/PSIP1/NANOG/ELK3/ARID3A/SUB1/XRCC6/ABL1/IFI16/HNRNPDL/KAT2B/NR1D1/HNRNPAB/HNRNPD/HNRNPK/LMNB1/PCNA/CEBPA/IRF4/APEX1/STAT1/NR5A2/JUND/TBP/HSF1/BATF/RAD23B/GMEB2/FOXM1/SETMAR/FOXO3/MUC1/TOX3/RUNX3/HMGB1/MAX/ZNF175/DDX58/IRF9/HMGA2/RPS3/HDAC2/MAZ/SNAI2/PURB/TOP1/CREB3L2/TDP1/CREBBP/PURA/IRF3/HSPD1/AGO1/HMGB2/ELK1/TERF1/CEBPG/NR1D2
GO_CELLULAR_RESPONSE_TO_HYDROGEN_PEROXIDE	41	0.538359	1.94017	0.000314798	0.0199388	0.0173534	ABL1/HGF/IL6/LCN2/PCNA/APEX1/PARK7/RHOB/HSF1/MAP1LC3A/NET1/ANXA1/IL18RAP/RPS3/HDAC2/PDGFD
GO_REGULATION_OF_HEMOPOIESIS	209	0.345927	1.60208	0.000327424	0.0202234	0.017601	PSMA6/SOD1/PRKCZ/TGFB1/PSMA2/MED1/IL4/CD4/PSMA1/IL17D/HSPA1A/CSF1/PSME2/ABL1/IFNL1/MDK/DPY30/WDR5/KAT2B/ISG15/HLA-G/IL18/IL7R/PSME1/PTPN6/HSPA1B/TNRC6B/BMP4/DLL1/IRF4/GNAS/MAPK14/PSMB4/FSTL3/PTN/ID2/RBBP5/ASH2L/STAT1/RBFOX2/PTPN2/PSMD7/TESC/SFRP1/RNF41/FOXO3/BAD/LILRB2/IL12RB1/LAG3/RUNX3/HMGB1/LGALS9/JAG1/PSMA7/IL1RL2/ANXA1/IL15/PSMD10/CCL3/IL23R/PURB/AGO3/IL20/THBS1/THPO/HSPA9/CREBBP/PRKCQ
GO_REGULATION_OF_CELLULAR_RESPONSE_TO_HEAT	29	0.603052	2.01079	0.000329115	0.0202234	0.017601	HSP90AA1/HSP90AB1/HSPA1A/HSPA8/CAMK2A/BAG4/FKBP4/HSPA1B/HSF1/CAMK2B/CAMK2D/DNAJB6/NUP98/HSPH1/DNAJB1/SEC13/CREBBP
GO_MRNA_EXPORT_FROM_NUCLEUS	22	0.639555	1.99731	0.000337537	0.0204359	0.017786	SRSF6/NXT1/SRSF7/HNRNPA2B1/PABPN1/DDX39B/THOC1/NXF1/EIF4A3/NUP98/SEC13/MAGOHB/EIF5A/AGFG1/YTHDC1
GO_INTERFERON_GAMMA_MEDIATED_SIGNALING_PATHWAY	36	0.556687	1.94837	0.000349172	0.0204495	0.0177979	FCGR1A/MED1/HSP90AB1/CAMK2A/HLA-G/B2M/IRF4/STAT1/CDC37/PTPN2/CAMK2B/NMI/GBP1/CAMK2D/IRF9/GBP2/IRF3/IRF6
GO_RESPONSE_TO_HEAT	72	0.450281	1.80501	0.000350102	0.0204495	0.0177979	SOD1/HSP90AA1/HSP90AB1/PSIP1/HSPA1A/HSPA8/PTGS2/CAMK2A/CD14/HTRA2/BAG4/CXCL10/FKBP4/HSPA1B/HSF1/CDKN1A/CAMK2B/CAMK2D/DNAJB6/CXCL12/HSPA5/HDAC2/NUP98/HSPH1/DNAJB1/THBS1/HSPA9/SEC13/CREBBP/HMOX1/MICB/MAPT/HSPA13/LRP11/EIF2S1
GO_CELLULAR_MACROMOLECULE_CATABOLIC_PROCESS	342	0.310133	1.49947	0.000352664	0.0204495	0.0177979	VIM/PSMA6/HSP90AA1/ANAPC10/PSMA2/HSP90AB1/RPS27A/RPL12/YBX1/UBE2L3/PSMA1/LONP1/UBE2E1/TAF15/HSPA1A/TNFRSF1B/HSPA8/UBQLN4/CLPP/PSME2/NR1D1/ISG15/FURIN/DNASE1L2/UBQLN2/PSME1/IL6/DNAJB2/HTRA2/HNRNPD/CLTA/EDC4/RPL30/PPT1/PABPC4/RPS7/SUMO2/CHEK2/HNRNPM/CEBPA/HSP90B1/HSPA1B/TNRC6B/VIP/MAPK14/PSMB4/APEX1/PCNP/CST3/PARK7/RNF8/PCYOX1L/RDX/RPS4X/PSMD7/HSF1/PLG/CSNK2A1/RAD23A/UBXN4/UBE2S/RAD23B/AP2A2/ERLEC1…
GO_REGULATION_OF_CELLULAR_CATABOLIC_PROCESS	278	0.326588	1.55257	0.000361893	0.0206269	0.0179522	VIM/PSMA6/BCL2/DCN/HSP90AA1/PSMA2/HSP90AB1/RPS27A/IL4/TBK1/YBX1/PSMA1/TAF15/HSPA1A/TNFRSF1B/HSPA8/UBQLN4/ABL2/SPTLC2/CAPNS1/PSME2/ABL1/IFI16/FURIN/UBQLN2/PAFAH1B2/HGF/PSME1/IL6/DNAJB2/HTRA2/HNRNPD/MCL1/PABPC4/RPS7/SUMO2/SCARB2/VPS26A/HNRNPM/CEBPA/HSPA1B/TNRC6B/VIP/MAPK14/PSMB4/APEX1/CST3/PARK7/CDC37/RDX/PSMD7/HSF1/CSNK2A1/RAD23A/RAD23B/ERLEC1/IL1B/YWHAB/GAPDH/ANXA2/RNF41/FOXO3/EZR/GDNF/BAD/GABARA…
GO_PROTEIN_INSERTION_INTO_MEMBRANE	24	0.621965	1.98198	0.000365742	0.0206269	0.0179522	BCL2/HSP90AA1/YWHAQ/YWHAH/PDCD5/GZMB/BID/YWHAB/RTP4/PPP3R1/BAD/SFN/YWHAG/YWHAZ/UBL4A
GO_RNA_PROCESSING	152	0.374473	1.67248	0.000391533	0.021783	0.0189584	CELF2/TGFB1/YBX1/SRSF6/SEPHS1/NCL/PSIP1/RBM39/HNRNPA1/TAF15/PUF60/HSPA1A/HSPA8/TRA2B/SF1/SNRPG/RBM23/SRSF7/HNRNPA2B1/HNRNPD/HNRNPK/PABPC4/RPS7/PABPN1/RPRD1B/HNRNPM/RNGTT/DDX39B/BMP4/HNRNPF/SNRPA/PES1/RBFOX2/SAP18/HSF1/SBDS/TARBP2/RBM19/RBM17/SSB/POLR2J/SNRPB2/SNRPD2/THOC1/EIF4A3/ELAVL1/PPIE/NUP98/AGO3/CIRBP/EXOSC8/MAGOHB
GO_CELLULAR_RESPONSE_TO_ANTIBIOTIC	55	0.485296	1.85288	0.000416135	0.022439	0.0195294	HNRNPA1/ABL1/HGF/IL6/LCN2/PCNA/APEX1/PARK7/RHOB/HSF1/MAP1LC3A/HSPA5/NET1/ANXA1/IL18RAP/RPS3/HDAC2/PTEN/PDGFD
GO_RNA_EXPORT_FROM_NUCLEUS	27	0.599158	1.96473	0.000422055	0.022439	0.0195294	SRSF6/HNRNPA1/NXT1/SRSF7/HNRNPA2B1/PABPN1/DDX39B/SSB/THOC1/NXF1/EIF4A3/NUP98/SEC13/MAGOHB/EIF5A/AGFG1/YTHDC1/RAN
GO_REGULATION_OF_MITOCHONDRIAL_MEMBRANE_PERMEABILITY_INVOLVED_IN_APOPTOTIC_PROCESS	26	0.597172	1.94066	0.000423973	0.022439	0.0195294	BCL2/HSPA1A/YWHAQ/YWHAH/CAMK2A/CHCHD10/GZMB/BID/YWHAB/PPP3R1/BAD/SFN
GO_SECRETORY_GRANULE	459	0.291923	1.44004	0.000427387	0.022439	0.0195294	SOD1/HMOX2/CTSG/HSP90AA1/TGFB1/PSMA2/HSP90AB1/MPO/TGFB3/BSG/VEGFC/FCAR/HSPA1A/TNFRSF1B/HSPA8/OLFM4/XRCC6/SERPINA3/FAM49B/VWF/ALDOA/PLA2G2A/B4GALT1/CD14/ITIH4/TMX3/PCSK2/THBS2/PAFAH1B2/HGF/SRGN/LCN2/EDN1/ITIH3/CYB5R1/TXNDC5/CMA1/KCNAB2/B2M/PRTN3/ELANE/ADAM15/PYGL/TGFB2/S100A12/PTPN6/HSPA1B/GPI/PTX3/CXCL1/POMC/MAPK14/STX3/FSTL3/CRISP3/CALR/PRSS2/CST3/PCYOX1L/CTSD/APLP2/FTL/PECAM1/FCGR3B/GHRL/PRDX4/…
GO_NEGATIVE_REGULATION_OF_CELL_CYCLE_PROCESS	105	0.40033	1.70126	0.000438201	0.022439	0.0195294	PSMA6/BCL2/PSMA2/HSP90AB1/RBBP4/PSMA1/ARID3A/PSME2/KAT2B/HLA-G/PSME1/RBL2/PCNA/CHEK2/LCMT1/BMP4/PSMB4/CALR/TNKS/PSMD7/CDKN1A/SKP1/SETMAR/CCL2/L3MBTL2/CHEK1/MUC1/MIF/SFN/MAX/PSMA7/NAA10/HMGA2/PSMD10/CASP2/MDM1/PTEN/CBX3
GO_UNFOLDED_PROTEIN_BINDING	62	0.463467	1.80926	0.000438825	0.022439	0.0195294	HSP90AA1/HSP90AB1/PFDN2/HSPA1A/HSPA8/NUDC/DNAJB2/GRPEL1/HTRA2/HSP90B1/HSPA1B/NUDCD3/CALR/CDC37/PFDN1/ERLEC1/HSPE1/DNAJB6/HSPA5/AIP/PPIE/ST13/PPIB/PFDN5/DNAJB1/HSPA9/HSPD1/PPIA/DNAJB11/PDRG1/HSPA13/NAP1L4/TCP1/DNAJA4/DNAJB4/CCT8/DNAJA2
GO_RNA_LOCALIZATION	53	0.487411	1.84632	0.000446043	0.022439	0.0195294	G3BP2/SRSF6/HNRNPA1/NXT1/SRSF7/HNRNPA2B1/PABPN1/DDX39B/TNKS/HSF1/PARP11/CETN3/SSB/THOC1/NXF1/EIF4A3/NUP98/SEC13/MAGOHB/PURA/EIF5A/AGFG1/TERF1/YTHDC1/RAN/EIF5A2/FMR1/TCP1/SNUPN
GO_NEGATIVE_REGULATION_OF_CELL_CYCLE	192	0.348626	1.59984	0.000450322	0.022439	0.0195294	PSMA6/BCL2/TGFB1/PSMA2/HSP90AB1/RBBP4/CGREF1/APBB2/PSMA1/ARID3A/PTGS2/PSME2/ABL1/KAT2B/MAPK12/HLA-G/PSME1/RBL2/HTRA2/PCNA/CHEK2/LCMT1/CEBPA/TGFB2/DDX39B/BMP4/MAPK14/PSMB4/CALR/ID2/TNKS/RHOB/PSMD7/CDKN1A/CXCL8/SKP1/FOXM1/SETMAR/CCL2/L3MBTL2/CHEK1/MUC1/THOC1/MIF/CAB39/SFN/RUNX3/MAX/PSMA7/MAGI2/NAA10/HMGA2/PSMD10/CASP2/MDM1/PTEN/THBS1/CBX3/PTPN11/HEXIM1/IRF6/CHMP2A/PEA15/PSMD11/TERF1
GO_PROTEIN_TARGETING	117	0.389283	1.68059	0.000456957	0.022439	0.0195294	HSP90AA1/DNAJC19/RPS27A/GABARAP/RPL12/NUCB1/UBE2L3/HSPA8/YWHAQ/GRPEL1/HTRA2/RPL30/RPS7/PDCD5/SCARB2/BAG4/BID/PRKCI/CDC37/RPS4X/SYNJ2BP/YWHAB/VTI1B/ARL6/RTP4/CAT/CHP1/SMURF1/HSPA5/CSNK2A2/AIP/RPS3/DECR2/STOM/GOLGA7/RPS5/NCF1/SRP14/UBB/ACAA1/UBC/HSPD1/YWHAG/YWHAZ/PRNP/AP4M1/GDI1/RPS19/RPS3A/UBE2D3/IDE/ERBB2/VTI1A/GSK3A/RPLP2/HRAS/PECR/PEX14/ECH1/SRP19
GO_TRANSLATION_REGULATOR_ACTIVITY	41	0.524435	1.88999	0.000457889	0.022439	0.0195294	EIF3G/EIF1AX/EIF4EBP2/EIF1AD/EIF5/DENR/EIF4E2/EIF4A3/EEF1B2/CIRBP/PURA/EIF4A1/EIF5A/DHFR/EIF4G2/EIF5A2/FMR1/TYMS/EIF1AY/EIF2S1/EIF4B/MTRF1L/SHMT1/EIF4A2/EIF4EBP1/EIF4H
GO_PROTEIN_INSERTION_INTO_MITOCHONDRIAL_MEMBRANE	20	0.645564	1.96988	0.000463278	0.022439	0.0195294	BCL2/HSP90AA1/YWHAQ/YWHAH/PDCD5/GZMB/BID/YWHAB/PPP3R1/BAD/SFN
GO_NEGATIVE_REGULATION_OF_CELL_KILLING	13	0.722177	1.96153	0.000481402	0.0230457	0.0200574	HSP90AB1/IL4/HLA-G/HAVCR2/IL7R/CRK/KIR2DL4/LGALS9
GO_RNA_SPLICING	93	0.415574	1.73566	0.000496109	0.0232713	0.0202538	CELF2/YBX1/SRSF6/NCL/PSIP1/RBM39/HNRNPA1/TAF15/PUF60/HSPA1A/HSPA8/TRA2B/SF1/SNRPG/SRSF7/HNRNPA2B1/HNRNPD/HNRNPK/PABPN1/HNRNPM/DDX39B/HNRNPF/SNRPA/RBFOX2/SAP18/RBM19/RBM17/POLR2J/SNRPB2/SNRPD2/THOC1/EIF4A3/ELAVL1/PPIE/NUP98/CIRBP/MAGOHB
GO_INTERLEUKIN_10_PRODUCTION	34	0.549115	1.89922	0.000497498	0.0232713	0.0202538	PRKCZ/CLEC7A/TSLP/ISG15/XCL1/HGF/DLL1/IRF4/LILRA5/CD47/CD40LG/HMGB1/LGALS9/IL23R/HSPD1/TRIB2/MMP8/TNFSF4
GO_RESPONSE_TO_HYDROGEN_PEROXIDE	71	0.447084	1.78879	0.000511729	0.0232713	0.0202538	SOD1/BCL2/ABL1/HGF/IL6/LCN2/GLRX2/PCNA/AREG/APEX1/PARK7/STAT1/RHOB/CRK/HSF1/MAP1LC3A/CAT/BAD/PRDX3/NET1/ANXA1/IL18RAP/RPS3/HDAC2/PDGFD/HMOX1
GO_REGULATION_OF_MYELOID_CELL_DIFFERENTIATION	107	0.40047	1.70642	0.000514377	0.0232713	0.0202538	TGFB1/MED1/IL4/CD4/HSPA1A/CSF1/DPY30/WDR5/KAT2B/ISG15/HSPA1B/TNRC6B/DLL1/GNAS/MAPK14/FSTL3/ID2/RBBP5/ASH2L/STAT1/RBFOX2/PTPN2/TESC/SFRP1/RNF41/FOXO3/JAG1/CCL3/IL23R/PURB/AGO3/IL20/THBS1/THPO/HSPA9/CREBBP/PRKCQ/AGO1/CSF3R/ROR2/HMGB2
GO_RNA_CATABOLIC_PROCESS	107	0.399636	1.70287	0.000514377	0.0232713	0.0202538	VIM/PSMA6/PSMA2/RPS27A/RPL12/YBX1/PSMA1/TAF15/HSPA1A/TNFRSF1B/HSPA8/PSME2/PSME1/HNRNPD/EDC4/RPL30/PABPC4/RPS7/HNRNPM/HSPA1B/TNRC6B/VIP/MAPK14/PSMB4/APEX1/RPS4X/PSMD7/YWHAB/RNASE6/SSB/GDNF/RNASE2/PSMA7/EIF4A3/RPS3/PSMD10/ELAVL1/AGO3/CIRBP/RPS5/EXOSC8/MAGOHB/UBB/UBC/AGO1/PSMD11/YWHAZ/PSME3/DCP1B/FMR1/RPS19/PSMB1/RPS3A
GO_REGULATION_OF_MACROAUTOPHAGY	46	0.496728	1.83053	0.000538061	0.0240782	0.020956	DCN/IL4/TBK1/UBQLN4/SPTLC2/CAPNS1/UBQLN2/PAFAH1B2/HTRA2/VPS26A/CDC37/GAPDH/RNF41/SMURF1/UCHL1
GO_PROCESS_UTILIZING_AUTOPHAGIC_MECHANISM	141	0.371749	1.64433	0.000544973	0.0240958	0.0209713	BCL2/DCN/HSP90AA1/IL4/GABARAP/GABARAPL1/TBK1/HSPA8/UBQLN4/ABL2/SPTLC2/CAPNS1/ABL1/IFI16/UBQLN2/PAFAH1B2/HGF/HTRA2/MCL1/VPS26A/DYNLL2/PARK7/CDC37/STX12/CSNK2A1/VPS25/GAPDH/MAP1LC3A/RNF41/FOXO3/BAD/GABARAPL2/SMURF1/HMGB1/HK2/CSNK2A2/UCHL1/S100A9/NAMPT/HMOX1/RAB39B/CHMP2A/ARSB/EIF4G2/SNX5/MAPT/NSFL1C/UBXN2B/CLTC/MAP1LC3B/RAB1B/STAT3/SYT11
GO_RESPONSE_TO_TUMOR_NECROSIS_FACTOR	166	0.360633	1.6274	0.00055577	0.0240958	0.0209713	PSMA6/PSMA2/TNFRSF8/PSMA1/HSPA1A/TNFRSF1B/PTGS2/PSME2/CCL20/NR1D1/XCL1/CD14/PSME1/LCN2/TNFRSF6B/EDN1/TNFRSF13B/CCL23/BAG4/CEBPA/HSPA1B/MAPK14/PSMB4/CCL7/CCL13/EDAR/STAT1/PTPN2/TNFSF15/GSS/HAMP/EDA2R/PSMD7/ASAH1/CXCL8/CXCL16/GBP1/SFRP1/TNFRSF1A/GSTP1/CHI3L1/CCL14/FOXO3/CCL2/CD40LG/TAX1BP1/PSMA7/RPS3/PSMD10/CCL24/CCL3/COMMD7/GBP2/THBS1/PIAS4/CCL15/CCL26/PLVAP/GCH1/PSMD11
GO_CELL_CELL_ADHESION_VIA_PLASMA_MEMBRANE_ADHESION_MOLECULES	118	-0.337245	-1.69392	0.000567483	0.0240958	0.0209713	PCDHGB1/NRXN1/KIRREL3/PVR/IL1RAP/CDHR3/PCDHA4/DSCAML1/DSC1/CDH6/PTPRS/DSCAM/ALCAM/CDH17/CLSTN1/SLITRK1/GRID2/CD209/CDH8/CX3CL1/CBLN1/MPZ/MDGA1/CADM1/UNC5D/ROBO2/ROBO1/PCDHB2/CDH5/DSG1/NPTN/MPZL2/DSC3/APOA1/PTPRD/LRFN5/CDH3/PCDH9/CNTN4/L1CAM/LRRC4C
GO_CELLULAR_RESPONSE_TO_EXTERNAL_STIMULUS	140	0.370902	1.63908	0.000570267	0.0240958	0.0209713	SOD1/BCL2/MED1/GABARAP/GABARAPL1/TNFRSF8/UPP1/HNRNPA1/HSPA8/PTGS2/TNFRSF10B/IFI16/GLUL/LCN2/GLRX2/GJA1/INHBB/HSP90B1/NPPA/PTN/TNKS/TNC/HSF1/CDKN1A/IL1B/PDXP/SFRP1/MAP1LC3A/TNFRSF1A/GSTP1/ASGR1/BAD/GABARAPL2/CHEK1/HSPA5/MAX/IL15/TNFRSF10A/FOLR2/DCTPP1/CASP2/SNAI2/BMP6/PTPN11/NAMPT/HMOX1/DAG1/NUDT1
GO_INTRINSIC_APOPTOTIC_SIGNALING_PATHWAY_IN_RESPONSE_TO_DNA_DAMAGE_BY_P53_CLASS_MEDIATOR	15	0.689528	1.94948	0.000571701	0.0240958	0.0209713	BCL2/IFI16/HNRNPK/CHEK2/CDKN1A/MUC1/MIF
GO_RESPONSE_TO_TEMPERATURE_STIMULUS	93	0.413001	1.72491	0.000574443	0.0240958	0.0209713	SOD1/HSP90AA1/HSP90AB1/PSIP1/HSPA1A/HSPA8/PTGS2/FGF16/CAMK2A/CD14/HTRA2/GLRX2/BAG4/CXCL10/FKBP4/HSPA1B/NTRK1/HSF1/CDKN1A/CAMK2B/CAMK2D/DNAJB6/CXCL12/HSPA5/HDAC2/NUP98/CIRBP/HSPH1/DNAJB1/THBS1/HSPA9/SEC13/CREBBP/HMOX1/HSPD1/MICB/MAPT/HSPA13/LRP11/EIF2S1/ACADVL/NFE2L1/DNAJA4
GO_REGULATION_OF_EXCITATORY_SYNAPSE_ASSEMBLY	13	-0.699822	-2.08564	0.000583771	0.0240958	0.0209713	NRXN1/IL1RAP/PTPRS/LRRTM2/GRID2/CBLN1/NTRK3/PTPRD/LRFN1
GO_REGULATION_OF_CELL_CYCLE_PROCESS	211	0.339009	1.57067	0.000585274	0.0240958	0.0209713	PSMA6/BCL2/HSP90AA1/ANAPC10/PSMA2/MED1/HSP90AB1/RBBP4/PSMA1/UBE2E1/BRD4/ARID3A/HSPA1A/PSME2/ADAMTS1/KAT2B/HLA-G/PSME1/RBL2/FGF8/EDN1/SMC3/PCNA/CHEK2/RPRD1B/LCMT1/PTPN6/HSPA1B/BID/BMP4/PSMB4/CALR/APEX1/ID2/TNKS/KIF23/RDX/PSMD7/CSNK2A1/CDKN1A/SKP1/IL1B/PDXP/SFRP1/FOXM1/SETMAR/PRC1/CCL2/L3MBTL2/CHEK1/MUC1/MIF/SFN/MAX/PSMA7/CUL4B/ANXA1/NAA10/CSNK2A2/HMGA2/PSMD10/CASP2/MDM1/PTEN
GO_MITOCHONDRION_ORGANIZATION	145	0.369578	1.6404	0.000616857	0.0251446	0.0218841	BCL2/DCN/HSP90AA1/FAM162A/DNAJC19/GABARAP/GABARAPL1/UBE2L3/LONP1/HSPA1A/YWHAQ/NDUFV2/YWHAH/CAMK2A/DNAJC11/HGF/GRPEL1/CHCHD10/HTRA2/PDCD5/BAG4/CEBPA/GZMB/BID/TNFSF10/PARK7/CDC37/SYNJ2BP/MX1/YWHAB/TYMP/MAP1LC3A/RNF41/PLAUR/PPP3R1/BAD/GABARAPL2/PRDX3/SMURF1/SFN/NDUFB8/CNP/HK2/CSNK2A2/AIP/PSMD10
GO_MITOCHONDRIAL_TRANSPORT	63	0.451355	1.76756	0.000656832	0.0264646	0.023033	BCL2/HSP90AA1/DNAJC19/UBE2L3/HSPA1A/YWHAQ/YWHAH/CAMK2A/GRPEL1/CHCHD10/HTRA2/PDCD5/BAG4/GZMB/BID/SLC25A18/YWHAB/PPP3R1/BAD/SFN/CNP/HK2/CSNK2A2/AIP
GO_RECEPTOR_COMPLEX	201	-0.273869	-1.48482	0.000666756	0.0264646	0.023033	ALCAM/ITLN1/EPHA1/SLITRK5/ACVR2A/PLXNA4/IL3RA/NOTCH3/GRID2/CSF2RB/PLXND1/SHANK1/IL6ST/VWC2/SCIMP/NOTCH1/BMPR1B/CSF2RA/TF/CD36/ROR1/IL4R/EPHA4/FLT4/CD3E/IL27RA/CNTFR/ZAP70/ERBB3/IGF1R/INSR/CR2/PLXNC1/ENG/CD8B/LIFR/TRADD/TRIL/NTRK3/PLA2R1/PLXNA1/TRAF1/TYRO3/KDR/OLFM2/VLDLR/IL11RA/GHR/KIT/NTRK2
GO_CELLULAR_RESPONSE_TO_LIPID	238	0.331489	1.55407	0.000668526	0.0264646	0.023033	VIM/CTSG/TGFB1/MED1/PGR/UBE2L3/TNFRSF1B/ABL2/ABL1/IL24/LBP/NR1D1/STC1/YWHAH/CD14/IL18/HAVCR2/IL6/GRAMD1C/LCN2/CCNA2/HTRA2/IL1RN/HNRNPD/EDN1/SPP1/PABPN1/CXCL10/ADAM15/FKBP4/IL36B/CXCL1/BMP4/MAPK14/CALR/PTN/CXCL11/PARK7/RBFOX2/NR5A2/HAMP/TNC/CXCL13/HSF1/LRP8/TESC/CXCL8/IL1B/SFRP1/YES1/GSTP1/MRC1/CCL2/BAD/LILRB2/MAP4K1/MIF/CXCL5/HMGB1/ANXA1/IL15/HDAC2/CCL3/SNAI2/BMP6/CBX3/CXCL9/DAG1/IRF3/IL1F10/BPI/…
GO_REGULATION_OF_SMOOTH_MUSCLE_CELL_DIFFERENTIATION	13	-0.697215	-2.07787	0.000689911	0.0270511	0.0235434	NFATC1/FGF9/OLFM2/SOD2/KIT/SHH
GO_METAL_ION_TRANSMEMBRANE_TRANSPORTER_ACTIVITY	50	-0.429666	-1.83333	0.000696816	0.0270641	0.0235547	JPH4/ATP1B3/SLC4A8/ANXA5/JPH3/ANXA9/HCN1/LRRC52/KCNIP3/SLC6A16/PKD2/KCNA10/PDE2A/SLC3A2/KCNN1/KCNE3/ATP2A3/SLC6A9/TF/SLC5A8/ATP1B2/KCNG4/SCN2B/KCNIP1/CACNA2D3/SLC30A3/ATP1B1
GO_RESPONSE_TO_INTERLEUKIN_1	106	0.394343	1.67753	0.000721798	0.0277724	0.0241712	PSMA6/PSMA2/RPS27A/PSMA1/PSME2/CCL20/NR1D1/XCL1/PSME1/IL6/LCN2/IL1RN/EDN1/CCL23/PSMB4/CCL7/CCL13/PRKCI/PSMD7/CD47/CXCL8/SKP1/IL1B/GBP1/SFRP1/CHI3L1/CCL14/CCL2/LGALS9/PSMA7/IL1RL2/ANXA1/FGG/PSMD10/CCL24/CCL3/GBP2/UBB/UBC/CCL15/UBE2V1/CCL26/APP/PSMD11/IGBP1/PSME3/MAP3K3/TFPI/PSMB1/CCL21/MAPK13
GO_CELLULAR_DEFENSE_RESPONSE	24	0.601083	1.91544	0.000731484	0.0278845	0.0242687	CD300C/SH2D1A/LBP/HLA-G/KIR3DL2/TRAT1/GNLY/NCR2/LILRB2/KIR2DL4/IL1RL2/NCF2/CXCL9/LGALS3BP/NCF1
GO_RESPONSE_TO_LIPID	379	0.299672	1.45956	0.000741064	0.0279904	0.024361	VIM/BCL2/DCN/CTSG/TGFB1/MBD4/MED1/MPO/TGFB3/CD4/PGR/UBE2L3/TNFRSF1B/PTGS2/ABL2/DHH/ABL1/MDK/IL24/LBP/NR1D1/STC1/YWHAH/CD14/PON1/IL18/HAVCR2/IL6/GRAMD1C/LCN2/CCNA2/HTRA2/IL1RN/HNRNPD/EDN1/PCNA/SPP1/GJA1/PABPN1/AREG/CXCL10/ELANE/ADAM15/TGFB2/FKBP4/IL36B/CXCL1/BMP4/MAPK14/CALR/PTN/CXCL11/PARK7/RBFOX2/NR5A2/JUND/HAMP/TNC/CXCL13/HSF1/LRP8/CDKN1A/TESC/IGFBP2/NEFL/CXCL8/IL1B/SFRP1/ACP5/YES1/GSTP1/MRC1/P…
GO_SECRETORY_VESICLE	498	0.284809	1.41135	0.000785013	0.0293809	0.0255711	SOD1/HMOX2/CTSG/HSP90AA1/TGFB1/BDNF/PSMA2/HSP90AB1/MPO/TGFB3/BSG/VEGFC/FCAR/HSPA1A/TNFRSF1B/HSPA8/OLFM4/XRCC6/SERPINA3/FAM49B/VWF/ALDOA/PLA2G2A/B4GALT1/CD14/ITIH4/TMX3/PCSK2/THBS2/PAFAH1B2/HGF/TRAPPC4/SRGN/LCN2/CLTA/EDN1/ITIH3/CYB5R1/PPT1/TXNDC5/CMA1/KCNAB2/B2M/NTF4/PRTN3/ELANE/ADAM15/PYGL/TGFB2/S100A12/PTPN6/HSPA1B/GPI/PTX3/CXCL1/POMC/MAPK14/STX3/FSTL3/CRISP3/CALR/PRSS2/CST3/STX12/PCYOX1L/CTSD/A…
GO_REGULATION_OF_MITOCHONDRIAL_OUTER_MEMBRANE_PERMEABILIZATION_INVOLVED_IN_APOPTOTIC_SIGNALING_PATHWAY	21	0.618721	1.9111	0.000800295	0.0294762	0.0256541	BCL2/HSPA1A/YWHAQ/YWHAH/CHCHD10/GZMB/BID/YWHAB/PPP3R1/BAD/SFN
GO_AMIDE_BIOSYNTHETIC_PROCESS	195	0.341315	1.56919	0.000803042	0.0294762	0.0256541	VIM/RPS27A/RPL12/ILF3/NCL/SPTLC2/EIF3G/FURIN/B4GALT3/RRBP1/IL6/HNRNPD/RPL30/PPT1/PABPC4/RPS7/CEBPA/ELANE/EIF1AX/BDH2/TNRC6B/DDX39B/MRPL34/MRPL52/CALR/B3GALT1/GSS/RPS4X/YBX2/MAPKAPK5/ASAH1/ASL/EIF4EBP2/EIF1AD/TARBP2/GAPDH/TNFRSF1A/FOXO3/EIF5/DENR/EIF4E2/EIF4A3/RPS3/PDHX/ELAVL1/PPA1/EEF1B2/AGO3/CIRBP/RPS5/THBS1/GCDH/PURA/EIF4A1/EIF5A/DHFR/AGO1/APP/GCH1/EIF4G2/GCLM/SARS2/CNDP2/MRPL33/RHOA/EIF5A2/FMR…
GO_T_CELL_MEDIATED_IMMUNITY	52	0.478556	1.80685	0.000809039	0.0294762	0.0256541	PRKCZ/IL4/TNFRSF1B/FAM49B/XCL1/HLA-G/IL18/IL7R/IL6/B2M/HPRT1/IL1B/CLEC4G/IL18R1/BTN3A3/IL12RB1/STX7/HMGB1/JAG1/IL18RAP/IL23R/HSPD1/MICB/IL31RA
GO_CELL_CYCLE_PROCESS	345	0.302668	1.4644	0.000836544	0.030211	0.0262936	PSMA6/BCL2/HSP90AA1/TGFB1/ANAPC10/PSMA2/MED1/HSP90AB1/RBBP4/CGREF1/UBE2L3/APBB2/PSMA1/UBE2E1/BRD4/ARID3A/HSPA1A/PSME2/ABL1/ADAMTS1/KAT2B/CAMK2A/MAPK12/HLA-G/PSME1/POLE3/RBL2/CCNA2/STAMBP/FGF8/EDN1/SMC3/PCNA/GJA1/CHEK2/RPRD1B/LCMT1/KIF22/TGFB2/PTPN6/HSPA1B/BID/BMP4/PSMB4/CALR/APEX1/ID2/TNKS/KIF23/RHOB/RDX/PSMD7/HSF1/SBDS/CSNK2A1/CDKN1A/UBE2S/CXCL8/SKP1/IL1B/PDXP/SFRP1/FOXM1/CETN3/SETMAR/PRC1/CCL2/…
GO_TRANSCRIPTION_REGULATOR_ACTIVITY	255	0.323319	1.52557	0.000845289	0.0302614	0.0263374	MED1/YBX1/HDGF/PGR/YEATS4/UBE2L3/MAFG/NANOG/ELK3/BRD4/ARID3A/HSPA1A/SUB1/SF1/ABL1/IFI16/ZNF329/GTF2I/KAT2B/NR1D1/HNRNPAB/SRA1/HNRNPK/CEBPA/ELANE/IRF4/APEX1/ID2/PARK7/STAT1/RBFOX2/SAP18/PFDN1/NR5A2/JUND/TBP/HSF1/BATF/NMI/GMEB2/FOXM1/PAX4/HOPX/NAB2/FOXO3/MUC1/RFXAP/TOX3/RUNX3/HMGB1/MNX1/MAX/LCORL/ZNF175/IRF9/ZNF10/AIP/HMGA2/MAZ/TEAD4/NUP98/SNAI2/PCBD1/PURB/PFDN5/DNAJB1/CREB3L2/PIAS4/CREBBP/ACTN2/PU…
GO_SMOOTH_MUSCLE_CELL_DIFFERENTIATION	22	-0.571169	-1.99201	0.000861425	0.0305732	0.0266088	MECP2/NPNT/NOTCH1/COMP/ENG/NFATC1/FGF9/OLFM2/SOD2/KIT/SHH
GO_RESPONSE_TO_ABIOTIC_STIMULUS	452	0.287972	1.41936	0.000877343	0.030872	0.0268689	PSMA6/SOD1/HMOX2/BCL2/DCN/HSP90AA1/FAM162A/MBD4/PSMA2/HSP90AB1/RPS27A/MPO/TGFB3/TNFRSF8/PSMA1/PSIP1/LONP1/VEGFC/XRCC4/HSPA1A/HSPA8/PTGS2/TNFRSF10B/FGF16/XRCC6/PSME2/IFI16/MDK/ANGPT4/STC1/CAMK2A/CD14/PSME1/ANGPTL4/POLE3/CCNA2/HTRA2/NETO1/HNRNPD/GDF5/EDN1/GLRX2/PCNA/GJA1/CHEK2/BAG4/CXCL10/ELANE/ADAM15/TGFB2/FKBP4/HSP90B1/HSPA1B/NPPA/MAPK14/PSMB4/PTN/ID2/NTRK1/STAT1/RNF8/JUND/SHANK3/RHOB/HAMP/GHRL/T…
GO_METHYLTRANSFERASE_COMPLEX	21	0.614783	1.89894	0.000923418	0.031825	0.0276984	RBBP4/ERH/SNRPG/DPY30/WDR5/RBBP5/ASH2L/SNRPD2/MAX/HDAC2
GO_RIBONUCLEOPROTEIN_GRANULE	65	0.440516	1.73448	0.000927618	0.031825	0.0276984	PSMA6/CTSG/G3BP2/PSMA2/YBX1/G3BP1/NCL/PABPC3/SNRPG/STAU1/BLNK/EDC4/HNRNPK/PABPC4/INA/TNRC6B/RPS4X/SERPINB1/HSF1/SNRPB2/ELAVL1/AGO3/TOP1/CIRBP/AGO1/TSTD1/MAPT/DCP1B/FMR1/EIF2S1/HABP4/TIAL1/APOBEC3G
GO_MONONUCLEAR_CELL_MIGRATION	65	0.440042	1.73261	0.000927618	0.031825	0.0276984	CCL27/CSF1/MDK/CCL20/XCL1/IL6/CCL23/CXCL10/S100A12/MAPK14/CCL7/CCL13/PECAM1/PLG/CD47/CXCL12/CCL14/CCL2/HMGB1/GREM1/ANXA1/CCL24/CCL3/PDGFD/THBS1/NBL1/CCL15/LGMN/FLT1/CCL26/RARRES2
GO_GLAND_MORPHOGENESIS	72	0.435633	1.7463	0.000942583	0.0318843	0.0277499	BCL2/TGFB1/MED1/TGFB3/PGR/CSF1/MDK/SEMA3A/HGF/FGF7/FGF8/AREG/TGFB2/BMP4/NTN1/PTN/EDAR/TNC/FGL1/NTN4/SFRP1
GO_MITOCHONDRIAL_OUTER_MEMBRANE_PERMEABILIZATION	24	0.592026	1.88658	0.000944834	0.0318843	0.0277499	BCL2/HSPA1A/YWHAQ/YWHAH/CHCHD10/GZMB/BID/YWHAB/PPP3R1/BAD/SFN
GO_SEQUENCE_SPECIFIC_DOUBLE_STRANDED_DNA_BINDING	146	0.362545	1.61091	0.00098464	0.0329574	0.0286839	MBD4/MED1/YBX1/RBBP4/PGR/MAFG/NANOG/ELK3/ARID3A/SUB1/ABL1/IFI16/HNRNPDL/KAT2B/NR1D1/HNRNPAB/HNRNPD/HNRNPK/LMNB1/CEBPA/IRF4/STAT1/NR5A2/JUND/TBP/HSF1/BATF/RAD23B/GMEB2/FOXM1/FOXO3/MUC1/TOX3/RUNX3/MAX/ZNF175/IRF9/HMGA2/RPS3/HDAC2/MAZ/SNAI2/PURB/TOP1/CREB3L2/CREBBP/PURA/IRF3/HSPD1/AGO1/HMGB2/ELK1/CEBPG/NR1D2
GO_PRE_MRNA_BINDING	13	0.704323	1.91304	0.000994897	0.0330322	0.028749	CELF2/SRSF6/HNRNPA1/TRA2B/SF1/HNRNPA2B1/TARBP2
GO_CATION_TRANSMEMBRANE_TRANSPORTER_ACTIVITY	67	-0.386466	-1.75459	0.00106448	0.0350596	0.0305135	JPH4/ATP1B3/SLC4A8/ANXA5/JPH3/ANXA9/HCN1/CNGA2/LRRC52/KCNIP3/SLC6A16/PKD2/KCNA10/PDE2A/SLC3A2/KCNN1/SLC41A2/COX7A1/KCNE3/ATP2A3/COX6A2/SLC6A9/COX4I2/TF/SLC5A8/SLC22A16/ATP1B2/KCNG4/SCN2B/KCNIP1/CACNA2D3/SLC30A3/ATP1B1
GO_INTRINSIC_APOPTOTIC_SIGNALING_PATHWAY_BY_P53_CLASS_MEDIATOR	24	0.589983	1.88007	0.00109723	0.035789	0.0311483	BCL2/HINT1/IFI16/HNRNPK/RPS7/CHEK2/EDA2R/CDKN1A/MUC1/MIF
GO_AZUROPHIL_GRANULE_LUMEN	54	0.459829	1.74897	0.00111241	0.035789	0.0311483	CTSG/MPO/SERPINA3/TXNDC5/PRTN3/ELANE/PRSS2/FTL/GRN/GNS/PRSS57/C3/IMPDH1/ANXA2/GM2A/GDI2/RNASE2/LYZ/ARSA/RETN/BPI/ARSB/HEXB/PRDX6/GLA/DEFA1/IST1/RNASET2/CCT8
GO_PROTEIN_LOCALIZATION_TO_ORGANELLE	272	0.315572	1.49673	0.0011127	0.035789	0.0311483	PRKCZ/BCL2/HSP90AA1/TGFB1/DNAJC19/MED1/RPS27A/RPL12/YBX1/UBE2L3/NXT1/HSPA8/YWHAQ/PTGS2/YWHAH/GLUL/SRGN/GRPEL1/CHCHD10/HTRA2/RPL30/RPS7/PDCD5/SCARB2/BAG4/GZMB/BID/NUDCD3/BMP4/MAPK14/CALR/PES1/TNKS/PARK7/RDX/RPS4X/GGA1/MX1/CDKN1A/SKP1/VPS25/GBP1/YWHAB/VTI1B/DNAJB6/SSB/ARL6/PPP3R1/EZR/CAT/CHP1/BAD/DLG2/ATAD1/SMURF1/HSPA5/SFN/FLNA/GGA3/HK2/CSNK2A2/AIP/RPS3/DECR2/GPC6/SPRN/NUP98/MBTPS1/ARL5B/RPS5/GBP2…
GO_NUCLEAR_TRANSPORT	104	0.389386	1.65213	0.00116267	0.0371063	0.0322948	TGFB1/MED1/SRSF6/PSIP1/HNRNPA1/NXT1/PTGS2/SNRPG/SRSF7/HNRNPA2B1/RANBP3/PABPN1/DDX39B/BMP4/MAPK14/CALR/PARK7/CDKN1A/IL1B/SSB/CHP1/SNRPD2/THOC1/SMURF1/SFN/FLNA/NXF1/EIF4A3/SPRN/NUP98/MBTPS1/HSPA9/APOD/SEC13/MAGOHB/PTPN11
GO_REGULATION_OF_MEGAKARYOCYTE_DIFFERENTIATION	20	0.618944	1.88865	0.00117364	0.0371682	0.0323487	DPY30/WDR5/KAT2B/TNRC6B/RBBP5/ASH2L/TESC/AGO3/THBS1/THPO/PRKCQ/AGO1/HMGB2
GO_CHROMOSOME	276	0.313595	1.49	0.00119918	0.0376871	0.0328003	ASF1A/MBD4/TMPO/MED1/RBBP4/PGR/PSIP1/NANOG/ELK3/BRD4/UBQLN4/XRCC6/SSRP1/KAT2B/NR1D1/HNRNPA2B1/SUMO3/POLE3/RBL2/HTRA2/HNRNPK/SMC3/PBRM1/PCNA/RECQL/CHEK2/KIF22/CEBPA/IRF4/DYNLT3/APEX1/PES1/TNKS/PARK7/ASH2L/STAT1/DCTN6/RNF8/NR5A2/JUND/ADPRHL2/TBP/HSF1/CSNK2A1/BATF/GMEB2/RBM19/FOXM1/PAX4/HOPX/SSB/SETMAR/FOXO3/FH/CHEK1/MUC1/THOC1/RUNX3/HMGB1/MNX1/FLNA/MAX/IRF9/CSNK2A2/HMGA2/HDAC2/BPTF/SUGT1/TEAD4/NUP9…
GO_NEGATIVE_REGULATION_OF_RESPONSE_TO_DNA_DAMAGE_STIMULUS	29	0.553016	1.84395	0.0012267	0.037991	0.0330648	BCL2/UBQLN4/CHEK2/BID/DDX39B/TPT1/HSF1/NUDT16L1/CXCL12/MUC1/THOC1/MIF/HMGA2/RPS3/PSMD10/SNAI2
GO_INFLAMMATORY_RESPONSE	379	0.294347	1.43363	0.00124237	0.037991	0.0330648	PSMA6/SOD1/PRKCZ/CLEC7A/TGFB1/IL4/JAM3/TSLP/TBK1/PSMA1/IL17D/BRD4/TNFRSF1B/PTGS2/CSF1/IL17RB/SERPINA3/IFI16/MDK/CCL20/LBP/NR1D1/XCL1/PLA2G2A/B4GALT1/CD14/ITIH4/IL18/HGF/HAVCR2/BLNK/IL1RL1/IL6/IL1RN/SPP1/GJA1/SAA1/CMA1/CCL23/CEBPA/CXCL10/ELANE/S100A12/PTX3/IL36B/CXCL1/NPPA/MAPK14/PSMB4/PTN/SAA2/CCL7/CD200/CXCL11/CCL13/PARK7/CST7/PTPN2/IGFBP4/REG3A/HAMP/GHRL/GRN/LILRA5/PROC/CXCL13/CD47/CXCL8/IL1B/N…
GO_EXTRACELLULAR_MATRIX	332	-0.244143	-1.40049	0.00124636	0.037991	0.0330648	DGCR6/COL10A1/COL20A1/ADAM19/A1BG/PRG2/LRRN1/LUM/MATN4/MMP20/GPC5/MMP14/SFRP2/MMRN2/VCAN/ASPN/ECM1/RELL2/FLRT2/APOC3/KNG1/EDIL3/CTSF/DPT/MMP2/CTSC/TGFBI/PRG3/FBLN1/TIMP2/LINGO3/CBLN1/VWC2/VIT/FGF1/ITIH1/APOH/CTHRC1/NCAN/LEFTY2/TNR/IFNA2/MARCO/LINGO1/NCAM1/TGM4/SCARA3/VWA2/CFP/THBS3/MYOC/SPOCK2/F7/TFIP11/COL25A1/TPSAB1/IHH/IGFALS/FMOD/SERPINC1/ITIH2/HRG/APOA4/A2M/COMP/TNXB/TRIL/FGB/LRRC15/THBS4/FG…
GO_REGULATION_OF_AUTOPHAGY	93	0.39904	1.66661	0.00125333	0.037991	0.0330648	BCL2/DCN/IL4/TBK1/UBQLN4/ABL2/SPTLC2/CAPNS1/ABL1/IFI16/UBQLN2/PAFAH1B2/HGF/HTRA2/MCL1/VPS26A/PARK7/CDC37/GAPDH/RNF41/FOXO3/BAD/SMURF1/HMGB1/HK2/CSNK2A2/UCHL1/NAMPT/HMOX1/RAB39B
GO_REGULATION_OF_SIGNAL_TRANSDUCTION_BY_P53_CLASS_MEDIATOR	50	0.472269	1.7687	0.00126224	0.037991	0.0330648	BCL2/RBBP4/TAF15/SSRP1/HNRNPK/RPS7/CHEK2/MAPK14/TBP/MAPKAPK5/CSNK2A1/CHEK1/MUC1/MIF/CSNK2A2/PSMD10/HDAC2/SPRED1/SNAI2/UBB/HEXIM1/BRPF1
GO_ACTIVE_TRANSMEMBRANE_TRANSPORTER_ACTIVITY	30	-0.509787	-1.92979	0.0012745	0.037991	0.0330648	ATP1B3/SLC4A8/ANXA5/SLC6A16/CFTR/SLC3A2/SLC26A5/SLCO5A1/CDH17/ATP2A3/SLC6A9/SLC5A8/SLC26A11/ATP1B2/PCYOX1/TOMM20L/SLC30A3/ATP1B1
GO_REGULATION_OF_RNA_SPLICING	37	0.518393	1.82583	0.00127562	0.037991	0.0330648	CELF2/SRSF6/NCL/HNRNPA1/HSPA1A/TRA2B/SRSF7/HNRNPA2B1/HNRNPK/HNRNPF/RBFOX2/SAP18/RBM19/RBM17
GO_REGULATION_OF_POSTSYNAPTIC_DENSITY_ORGANIZATION	14	-0.654843	-1.99895	0.00128267	0.037991	0.0330648	IL1RAP/PTPRS/LRRTM2/GRID2/CBLN1/NTRK3/PTPRD/LRFN1
GO_VASCULAR_SMOOTH_MUSCLE_CELL_DIFFERENTIATION	11	-0.719875	-2.03012	0.00129246	0.0380075	0.0330791	COMP/ENG/NFATC1/FGF9/SOD2/KIT
GO_SPLICEOSOMAL_COMPLEX_ASSEMBLY	10	0.739763	1.86279	0.00131092	0.0382769	0.0333136	CELF2/SRSF6/PSIP1/SF1/SNRPG/DDX39B/SNRPD2
GO_CHEMOKINE_ACTIVITY	42	0.495105	1.79268	0.00137119	0.039437	0.0343233	CCL27/CCL20/XCL1/CCL23/CXCL10/CXCL1/CCL7/CXCL11/CCL13/CXCL14/CXCL13/CXCL8/CXCL16/CXCL12/CCL14/CCL2/CXCL5/CCL24/CCL3/CXCL9/CCL28/CCL15/CCL26/C5
GO_NUCLEOSIDE_PHOSPHATE_CATABOLIC_PROCESS	34	0.522327	1.80657	0.00137544	0.039437	0.0343233	MBD4/UPP1/DUT/HINT1/PDE1A/PDE7A/NUDT9/NUDT5/HPRT1/NUDT3/CNP/DCTPP1/SMPDL3A/NUDT1/ENTPD3
GO_REGULATION_OF_LYMPHOCYTE_MEDIATED_IMMUNITY	82	0.413841	1.69513	0.00137938	0.039437	0.0343233	PRKCZ/TGFB1/IL4/TNFRSF1B/FAM49B/SH2D1A/XCL1/HLA-G/IL18/HAVCR2/IL7R/IL6/B2M/PTPN6/CD226/CRK/IL1B/C3/CLEC4G/IL18R1/IL12RB1/STX7/THOC1/KIR2DL4/LAG3/HMGB1/LGALS9/IL18RAP/IL23R/HSPD1/SLAMF6/MICB/VAV1
GO_RESPONSE_TO_GROWTH_FACTOR	366	0.29594	1.43735	0.00140163	0.0395537	0.0344249	PRKCZ/DCN/CILP/GDF9/TGFB1/BDNF/MED1/FGF12/HSP90AB1/FGF5/RPS27A/TGFB3/BMP10/NCL/VEGFC/FGF4/SHC1/HNRNPA1/HSPA1A/TNFRSF1B/FGF16/DUSP3/ABL1/FURIN/XCL1/HGF/ADAMTSL2/FGF7/STMN2/CCNA2/HTRA2/FGF8/GDF5/EDN1/FGF22/FLRT1/PDCD5/NTF4/HNRNPM/FGFR3/BAG4/TGFB2/FGFBP3/IBSP/BMP4/DLL1/MAPK14/HNRNPF/FSTL3/PTN/CRKL/NTRK1/FGFRL1/RBFOX2/FGF20/HTRA1/FGFBP1/RDX/FST/FGFR4/CRK/TNC/CXCL13/CFC1/LRP8/GDF15/CXCL8/IL1B/COL3A1/S…
GO_CALCIUM_DEPENDENT_CELL_CELL_ADHESION_VIA_PLASMA_MEMBRANE_CELL_ADHESION_MOLECULES	19	-0.588549	-1.96719	0.00140268	0.0395537	0.0344249	CDH6/CDH17/CDH8/PCDHB2/CDH5/DSG1/CDH3
GO_REGULATION_OF_CELL_CYCLE_ARREST	31	0.539106	1.82561	0.00145509	0.0402478	0.035029	HSP90AB1/ARID3A/RBL2/PCNA/CHEK2/CALR/ID2/CDKN1A/FOXM1/SETMAR/MUC1/MIF/SFN/HMGA2/CASP2
GO_POSITIVE_REGULATION_OF_MITOCHONDRIAL_OUTER_MEMBRANE_PERMEABILIZATION_INVOLVED_IN_APOPTOTIC_SIGNALING_PATHWAY	19	0.621421	1.87084	0.00146058	0.0402478	0.035029	BCL2/YWHAQ/YWHAH/CHCHD10/GZMB/BID/YWHAB/PPP3R1/BAD/SFN/YWHAG/YWHAZ
GO_REGULATION_OF_ESTABLISHMENT_OF_PROTEIN_LOCALIZATION_TO_MITOCHONDRION	34	0.520783	1.80123	0.00146323	0.0402478	0.035029	BCL2/UBE2L3/YWHAQ/YWHAH/HTRA2/PDCD5/BAG4/GZMB/BID/YWHAB/PPP3R1/BAD/SFN/CSNK2A2/YWHAG/YWHAZ/MAPT
GO_TRANSLATIONAL_INITIATION	46	0.483103	1.78032	0.00147259	0.0402478	0.035029	RPS27A/RPL12/EIF3G/RPL30/RPS7/EIF1AX/RPS4X/EIF4EBP2/EIF1AD/EIF5/DENR/EIF4E2/RPS3/RPS5/EIF4A1/EIF4G2/FMR1/RPS19/EIF1AY/EIF2S1/RPS3A/HABP4/EIF4B/EIF4A2/EIF4EBP1/RPLP2/EIF4H
GO_REGULATION_OF_CELL_AGING	17	0.640739	1.87249	0.00147618	0.0402478	0.035029	ABL1/HLA-G/B2M/FOXM1/MIF/KIR2DL4/HMGA2/PTEN/NAMPT/MAP3K3
GO_REGULATION_OF_CELL_CYCLE_G1_S_PHASE_TRANSITION	52	0.463353	1.74945	0.00150649	0.0407445	0.0354613	BCL2/ARID3A/PSME2/ADAMTS1/PSME1/RBL2/PCNA/CHEK2/PTPN6/BID/APEX1/ID2/RDX/CDKN1A/CCL2/MUC1/SFN/CUL4B/ANXA1/CASP2/PTEN
GO_POSITIVE_REGULATION_OF_MEMBRANE_PERMEABILITY	26	0.567354	1.84376	0.00151419	0.0407445	0.0354613	BCL2/HSPA1A/YWHAQ/YWHAH/CHCHD10/GZMB/BID/YWHAB/PPP3R1/BAD/SFN
GO_MEGAKARYOCYTE_DIFFERENTIATION	27	0.561186	1.84022	0.00153749	0.0411028	0.0357731	IL11/MED1/DPY30/WDR5/KAT2B/PTPN6/TNRC6B/RBBP5/ASH2L/TESC/AGO3/THBS1/THPO/PTPN11/PRKCQ/AGO1/HMGB2
GO_RESPONSE_TO_FIBROBLAST_GROWTH_FACTOR	83	0.407168	1.67094	0.0015649	0.0411852	0.0358448	FGF12/FGF5/FGF4/HNRNPA1/FGF16/FGF7/FGF8/FGF22/FLRT1/HNRNPM/FGFR3/FGFBP3/HNRNPF/CRKL/FGFRL1/RBFOX2/FGF20/FGFBP1/FGFR4/TNC/CXCL13/CXCL8/SFRP1/POLR2J/CCL2/FGF18/SPRED1/GALNT3/FGF6/THBS1/PTPN11/APLN/ELK1/RAB14/GCLM/DLL4/FGF3/STAR/TIAL1/CBL/GRB2
GO_LEUKOCYTE_CHEMOTAXIS	136	0.36063	1.5882	0.00156865	0.0411852	0.0358448	CCL27/JAM3/VEGFC/CSF1/MDK/CCL20/LBP/XCL1/IL6/IL1RN/EDN1/SAA1/CCL23/CXCL10/TGFB2/S100A12/IL36B/CXCL1/MAPK14/CALR/PTN/CCL7/CXCL11/CCL13/CXCL14/CXCL13/SBDS/CXCL8/IL1B/CXCL16/CXCL12/CCL14/CCL2/MIF/CXCL5/HMGB1/LGALS9/GREM1/ANXA1/CCL24/CCL3/S100A9/THBS1/VEGFA/CXCL9/SWAP70/NBL1/CCL15/LGMN/FLT1/IL1F10/CCL26/CSF3R/RARRES2/VAV1/DDT/C5
GO_PROTEIN_LOCALIZATION_TO_CELL_SURFACE	33	0.524451	1.80219	0.00158828	0.0411852	0.0358448	BDNF/HSP90AB1/JAM3/FGF7/KCNAB2/STX3/GGA1/TAX1BP3/FBLN5/SMURF1/FLNA/GGA3/STX4/CD177/ACTN2
GO_ESTABLISHMENT_OF_PROTEIN_LOCALIZATION_TO_ORGANELLE	170	0.343304	1.55358	0.0015904	0.0411852	0.0358448	BCL2/HSP90AA1/TGFB1/DNAJC19/MED1/RPS27A/RPL12/UBE2L3/NXT1/HSPA8/YWHAQ/PTGS2/YWHAH/GRPEL1/HTRA2/RPL30/RPS7/PDCD5/SCARB2/BAG4/GZMB/BID/BMP4/MAPK14/RPS4X/MX1/CDKN1A/VPS25/YWHAB/VTI1B/PPP3R1/CAT/CHP1/BAD/ATAD1/SMURF1/HSPA5/SFN/FLNA/HK2/CSNK2A2/AIP/RPS3/DECR2/SPRN/NUP98/MBTPS1/RPS5/APOD/SRP14/UBB/ACAA1/UBC/HSPD1/YWHAG/TERF1/YWHAZ/MAPT/RAN/AP4M1/RPS19/RPS3A/STAT3/TCP1/UBE2D3/SNAP25/SNUPN/IDE/VTI1A/CCT8…
GO_RESPONSE_TO_DRUG	381	0.291484	1.42015	0.00159059	0.0411852	0.0358448	VIM/SOD1/BCL2/GDF9/TGFB1/HSP90AB1/TGFB3/NUCB1/VEGFC/HNRNPA1/PTGS2/ABL1/MDK/CD14/AGRN/BCAR3/HGF/P2RX6/IL6/LCN2/CCNA2/HNRNPD/FGF8/EDN1/NNMT/GLRX2/PCNA/GJA1/B2M/CHEK2/AREG/ADAM15/TGFB2/HSP90B1/ALK/GNAS/MAPK14/CALR/PTN/APEX1/CRKL/NTRK1/LCK/PARK7/STAT1/FGF20/HPRT1/JUND/RHOB/HAMP/GHRL/SYT17/CRK/TNC/HSF1/KYNU/LRP8/CDKN1A/IGFBP2/SLC25A18/NEFL/IL1B/PDXP/REG1A/SFRP1/MAP1LC3A/GSTP1/CXCL12/QDPR/OXT/CA9/BLMH/…
GO_PROTEIN_LOCALIZATION_TO_MEMBRANE	216	0.324655	1.50768	0.00163368	0.0420367	0.0365859	PRKCZ/BCL2/HSP90AA1/TGFB1/RPS27A/RPL12/BSG/YWHAQ/YWHAH/AGRN/RPL30/RPS7/PDCD5/BAG4/STX8/GZMB/BID/STX3/PTN/CRKL/PRKCI/SHANK3/RDX/RPS4X/LIN7A/SYNJ2BP/GGA1/TESC/GPC2/GBP1/YWHAB/VTI1B/CNPY4/ANXA2/TNFRSF1A/ARL6/RTP4/PPP3R1/EZR/CHP1/BAD/DLG2/PIGR/STX7/SMURF1/HSPA5/SFN/FLNA/GGA3/ITGAL/STX4/MAGI2/RPS3/GPC6/STOM/GOLGA7/ARL5B/RPS5/NCF1/SRP14/ACTN2/DAG1/DPP10/CSRP3/EPHA2/YWHAG/YWHAZ/UBL4A/CAV3/MADCAM1/ITGB7/…
GO_REGULATION_OF_CYSTEINE_TYPE_ENDOPEPTIDASE_ACTIVITY	119	0.369105	1.59685	0.0016725	0.0425656	0.0370462	CLEC7A/FAM162A/PTGS2/TNFRSF10B/IFI16/HGF/HTRA2/PDCD5/BID/TNFSF10/LCK/PARK7/CST7/TNFSF15/CTSD/HSF1/CSNK2A1/HSPE1/DNAJB6/PLAUR/F3/POR/BAD/PRDX3/SFN/HMGB1/LGALS9/TNFRSF10A/RPS3/S100A9/BIRC7/THBS1/VEGFA/LGMN/HSPD1/CASP10/IGBP1/MAPT/ANP32B/RHOA
GO_MITOTIC_CELL_CYCLE	272	0.309818	1.46944	0.00168041	0.0425656	0.0370462	PSMA6/BCL2/HSP90AA1/TGFB1/ANAPC10/PSMA2/YEATS4/PSMA1/UBE2E1/BRD4/ARID3A/HSPA1A/DUSP3/PSME2/ABL1/ADAMTS1/CAMK2A/HGF/PSME1/POLE3/RBL2/CCNA2/STAMBP/FGF8/EDN1/SMC3/PBRM1/PCNA/GJA1/CHEK2/LCMT1/KIF22/PTPN6/HSPA1B/BID/BMP4/PSMB4/DYNLT3/APEX1/ID2/TNKS/KIF23/RHOB/RDX/PSMD7/HSF1/SBDS/CDKN1A/UBE2S/SKP1/IL1B/PDXP/FOXM1/SETMAR/PRC1/CCL2/CHEK1/MUC1/SFN/FLNA/MAX/PSMA7/CUL4B/MAGI2/ANXA1/NAA10/HMGA2/PSMD10/BRSK2/…
GO_CELLULAR_HOMEOSTASIS	308	0.303303	1.45499	0.00169529	0.0425656	0.0370462	SOD1/HMOX2/BCL2/MPO/CD4/MAFG/TRA2B/ABL2/ABL1/GTF2I/NR1D1/STC1/ALDOA/PDIA4/XCL1/KEL/TMX3/TXNRD1/IL6/C1QTNF1/LCN2/DNAJB2/NADK/EDN1/ISCU/PPT1/MCL1/GLRX2/TXNDC5/GJA1/SAA1/CMA1/CCL23/CXCL10/ELANE/PTPN6/HSP90B1/CALR/APEX1/CCL7/CXCL11/TPT1/CCL13/LCK/GLRX/GSTO1/FTL/SHANK3/HAMP/GHRL/PRDX4/GRN/CXCL13/PLG/UBE2S/SKP1/CAMK2D/ATOX1/ANXA2/CXCL12/PLCG2/CCL14/OXT/CCL2/CHP1/BAD/PTH1R/CFL2/PDIA6/PRDX3/HMGB1/STX4/TN…
GO_MITOCHONDRIAL_MEMBRANE_ORGANIZATION	39	0.500098	1.7825	0.00169848	0.0425656	0.0370462	BCL2/HSP90AA1/HSPA1A/YWHAQ/YWHAH/CAMK2A/DNAJC11/CHCHD10/PDCD5/GZMB/BID/YWHAB/PPP3R1/BAD/SFN/CNP/HK2
GO_REGULATION_OF_VIRAL_GENOME_REPLICATION	33	0.520582	1.78889	0.00170593	0.0425656	0.0370462	BCL2/ILF3/IFI16/ISG15/STAU1/NR5A2/MX1/RAD23A/CXCL8/TARBP2/HMGA2/STOM/PPIE/PPIB/VAPA/PPIA/FMR1/SLPI/LTF/APOBEC3G/OAS1/CCL8
GO_CELL	344	0.29695	1.43631	0.00171802	0.0426091	0.037084	SOD1/PRKCZ/HMOX2/BCL2/MPO/CD4/MAFG/TRA2B/ABL2/ABL1/GTF2I/STC1/ALDOA/PDIA4/XCL1/KEL/TMX3/TXNRD1/IL6/C1QTNF1/LCN2/DNAJB2/EDN1/ISCU/PPT1/MCL1/GLRX2/TXNDC5/GJA1/SAA1/CMA1/CCL23/KIF22/CXCL10/ELANE/HSP90B1/MAPK14/CALR/APEX1/CCL7/CXCL11/TPT1/CCL13/LCK/PARK7/GLRX/GSTO1/FTL/KIF23/SHANK3/HAMP/GHRL/PRDX4/LIN7A/GRN/CXCL13/PLG/UBE2S/SKP1/ATOX1/ANXA2/ARL6/CXCL12/PLCG2/CCL14/OXT/CCL2/EZR/CHP1/PTH1R/SYNE2/CFL2/P…
GO_APOPTOTIC_MITOCHONDRIAL_CHANGES	54	0.451153	1.71597	0.00177985	0.0438782	0.0381886	BCL2/FAM162A/HSPA1A/YWHAQ/YWHAH/CAMK2A/HGF/CHCHD10/PDCD5/GZMB/BID/TNFSF10/YWHAB/PLAUR/PPP3R1/BAD/SFN/HK2/PSMD10/HSPD1/YWHAG/YWHAZ/GCLM/IFIT2
GO_SUPRAMOLECULAR_COMPLEX	295	0.305267	1.45919	0.00181606	0.0444373	0.0386752	VIM/PSMA6/DCN/CTSG/G3BP2/PSMA2/COL23A1/GABARAP/JAM3/GABARAPL1/YBX1/G3BP1/BMP10/NCL/PABPC3/SNRPG/KAT2B/ALDOA/STAU1/BLNK/NUDC/SUMO3/TNNT2/EDC4/HNRNPK/LMNB1/PABPC4/SAA1/KCNAB2/DYNLL2/KIF22/INA/FKBP4/TNRC6B/DYNLT3/TPT1/DCTN6/PECAM1/RAC3/KIF23/RPS4X/SERPINB1/HSF1/NEFL/MYL3/COL3A1/MAP1LC3A/DNAJB6/ARL6/YES1/AIF1L/PRC1/EZR/FBLN5/SNRPB2/SYNE2/KRT1/CFL2/FLNA/MFAP4/TWF1/ANXA1/TNNI2/PARVA/ELAVL1/STMN1/SUGT1/…
GO_POSITIVE_REGULATION_OF_HYDROLASE_ACTIVITY	286	0.306019	1.45882	0.00182412	0.0444373	0.0386752	PRKCZ/CLEC7A/FAM162A/BDNF/DNAJC19/PLA2G5/HSP90AB1/ARHGDIA/HSPA1A/ABL2/TNFRSF10B/PSME2/IFI16/CCL20/ARHGAP36/XCL1/MAPK12/AGRN/PSME1/DNAJB2/HTRA2/RANBP3/TNNT2/PDCD5/PCNA/NTF4/CCL23/FGFR3/DYNLL2/PRTN3/RGS5/BID/TNFSF10/MAPK14/ARHGAP30/CCL7/CD200/CRKL/CCL13/NTRK1/LCK/TNFSF15/CTSD/GRN/CRK/CXCL13/HSF1/TAX1BP3/MYL3/HSPE1/SFRP1/RGS1/DNAJB6/SETMAR/GM2A/CCL14/F3/CCL2/NAPA/ARHGDIB/BAD/GABARAPL2/GDI2/ADPRH/ALD…
GO_MACROAUTOPHAGY	82	0.406853	1.66651	0.00185686	0.0448798	0.0390604	DCN/IL4/GABARAP/GABARAPL1/TBK1/UBQLN4/SPTLC2/CAPNS1/UBQLN2/PAFAH1B2/HTRA2/VPS26A/DYNLL2/CDC37/STX12/CSNK2A1/VPS25/GAPDH/MAP1LC3A/RNF41/GABARAPL2/SMURF1/CSNK2A2/UCHL1
GO_RESPONSE_TO_EXTRACELLULAR_STIMULUS	209	0.326307	1.51122	0.00187099	0.0448798	0.0390604	SOD1/BCL2/MED1/MPO/CD4/GABARAP/GABARAPL1/UPP1/HNRNPA1/HSPA8/PTGS2/IFI16/STC1/PON1/GLUL/P2RX6/LCN2/GLRX2/PCNA/SPP1/INHBB/CXCL10/CLPSL1/HSP90B1/POMC/PTN/NTRK1/TNKS/STAT1/GSS/HAMP/GHRL/TNC/HSF1/KYNU/CDKN1A/GDF15/IGFBP2/IL1B/PDXP/REG1A/SFRP1/MAP1LC3A/GSTP1/ASGR1/FOXO3/OXT/CAT/POR/GABARAPL2
GO_REGULATION_OF_CATABOLIC_PROCESS	331	0.298127	1.43742	0.0018827	0.0448798	0.0390604	VIM/PSMA6/BCL2/DCN/HSP90AA1/PSMA2/HSP90AB1/RPS27A/IL4/TBK1/YBX1/PSMA1/TAF15/HSPA1A/TNFRSF1B/HSPA8/UBQLN4/ABL2/SPTLC2/CAPNS1/PSME2/ABL1/IFI16/FURIN/UBQLN2/PAFAH1B2/HGF/PSME1/IL6/DNAJB2/HTRA2/HNRNPD/MCL1/PABPC4/RPS7/SUMO2/SCARB2/VPS26A/GJA1/CHEK2/HNRNPM/CEBPA/HSPA1B/TNRC6B/VIP/MAPK14/PSMB4/APEX1/CST3/PARK7/CDC37/RDX/GGA1/PSMD7/HSF1/CSNK2A1/RAD23A/RAD23B/ERLEC1/IL1B/YWHAB/GAPDH/ANXA2/RNF41/FOXO3/EZR…
GO_AZUROPHIL_GRANULE	81	0.407916	1.66744	0.00188589	0.0448798	0.0390604	CTSG/MPO/SERPINA3/B4GALT1/TXNDC5/PRTN3/ELANE/STX3/PRSS2/FTL/GRN/GNS/PRSS57/C3/IMPDH1/ANXA2/GM2A/GDI2/PIGR/STX7/RNASE2/LYZ/STOM/ACPP/ARSA/RETN/BPI/VAPA/ARSB/HEXB/PRDX6/CEACAM8/GLA/DEFA1/IST1/RNASET2/DDOST/CCT8
GO_CHEMOKINE_RECEPTOR_BINDING	51	0.457416	1.71976	0.00190311	0.0450293	0.0391905	CCL27/CCL20/XCL1/CCL23/CXCL10/CXCL1/CCL7/CXCL11/CCL13/STAT1/CXCL14/CXCL13/CXCL8/CXCL16/CXCL12/CCL14/CCL2/CXCL5/CCL24/CCL3/CXCL9/CCL28/CCL15/CCL26
GO_POSITIVE_REGULATION_OF_ESTABLISHMENT_OF_PROTEIN_LOCALIZATION_TO_MITOCHONDRION	28	0.548087	1.81297	0.00192146	0.0452037	0.0393423	BCL2/UBE2L3/YWHAQ/YWHAH/HTRA2/PDCD5/GZMB/BID/YWHAB/PPP3R1/BAD/SFN/CSNK2A2
GO_REGULATION_OF_TRANSFERASE_ACTIVITY	374	0.290677	1.41416	0.00196584	0.045985	0.0400222	SOD1/PRKCZ/HSP90AA1/TGFB1/BDNF/FCGR1A/HSP90AB1/RPS27A/TCL1B/TGFB3/IL4/CD4/UBE2L3/SHC1/TNFRSF10B/CSF1/XRCC6/DUSP3/ABL1/ANGPT4/KAT2B/IL18/HNRNPA2B1/HGF/RBL2/CCNA2/HNRNPD/EDN1/RPS7/SAA1/PABPN1/FGFR3/CEBPA/CXCL10/ELANE/TGFB2/S100A12/PTPN6/BMP4/ALK/NPPA/MAPK14/CD200/CRKL/NTRK1/TNKS/PARK7/CDC37/PTPN2/TNFSF15/GHRL/LILRA5/CRK/MAPKAPK5/LRP8/CDKN1A/GDF15/TESC/UBE2S/IL1B/TARBP2/VPS25/SFRP1/GSTP1/NAB2/CHI3L1…
GO_ACTIVE_ION_TRANSMEMBRANE_TRANSPORTER_ACTIVITY	20	-0.566937	-1.92095	0.00198593	0.0461592	0.0401739	ATP1B3/SLC4A8/ANXA5/SLC6A16/SLC3A2/SLC26A5/SLCO5A1/ATP2A3/SLC6A9/SLC5A8/SLC26A11/ATP1B2/PCYOX1/SLC30A3/ATP1B1
GO_HIGH_DENSITY_LIPOPROTEIN_PARTICLE_REMODELING	11	-0.702531	-1.9812	0.00201623	0.0461592	0.0401739	ALB/APOA4/APOC1/APOA1/APOM
GO_REGULATION_OF_CELLULAR_RESPONSE_TO_STRESS	290	0.304177	1.45211	0.00202125	0.0461592	0.0401739	SOD1/BCL2/HSP90AA1/HSP90AB1/HSPA1A/HSPA8/UBQLN4/PTGS2/DUSP3/ABL1/CAMK2A/SEMA3A/HLA-G/UBQLN2/HGF/HTRA2/IL1RN/EDN1/HNRNPK/MCL1/PCNA/SPP1/B2M/CHEK2/BAG4/TGFB2/FKBP4/HSPA1B/BID/IL36B/DDX39B/NPPA/PTN/TPT1/PARK7/EDAR/PTPN2/RNF8/EDA2R/GRN/HSF1/ERLEC1/IL1B/CAMK2B/SFRP1/FOXM1/CAMK2D/NUDT16L1/DNAJB6/SETMAR/GSTP1/CXCL12/SCARF1/EZR/FBLN5/BAD/CD40LG/CHEK1/MAP4K1/MUC1/THOC1/HSPA5/MIF/KIR2DL4/HMGB1/HMGA2/RPS3/P…
GO_PROTEIN_LOCALIZATION_TO_MITOCHONDRION	49	0.462899	1.72702	0.00202543	0.0461592	0.0401739	BCL2/HSP90AA1/DNAJC19/UBE2L3/YWHAQ/YWHAH/GRPEL1/HTRA2/PDCD5/BAG4/GZMB/BID/YWHAB/PPP3R1/BAD/SFN/HK2/CSNK2A2/AIP/HSPD1/YWHAG/YWHAZ/MAPT
GO_CELLULAR_RESPONSE_TO_EXTRACELLULAR_STIMULUS	98	0.386939	1.62825	0.00202935	0.0461592	0.0401739	SOD1/BCL2/MED1/GABARAP/GABARAPL1/UPP1/HNRNPA1/HSPA8/PTGS2/IFI16/GLUL/LCN2/GLRX2/INHBB/HSP90B1/PTN/TNKS/TNC/HSF1/CDKN1A/PDXP/SFRP1/MAP1LC3A/GSTP1/ASGR1/GABARAPL2/HSPA5/MAX/IL15/FOLR2/DCTPP1/SNAI2/NAMPT/HMOX1
GO_RESPONSE_TO_OXIDATIVE_STRESS	210	0.324439	1.50276	0.00208304	0.0471202	0.0410102	SOD1/HMOX2/BCL2/MPO/PSIP1/LONP1/HSPA1A/PTGS2/ABL1/HGF/STAU1/TXNRD1/IL6/LCN2/CCNA2/HTRA2/HNRNPD/FGF8/EDN1/MCL1/GLRX2/PCNA/HNRNPM/AREG/HSPA1B/APEX1/PARK7/STAT1/TPO/GSS/RHOB/ADPRHL2/PRDX4/CRK/HSF1/ATOX1/MAP1LC3A/GSTP1/FOXO3/CAT/FBLN5/BAD/KRT1/CA3/PRDX3/NET1/STX4/ANXA1/IL18RAP/RPS3/HDAC2/NCF2/PDGFD/APOD/NCF1/HMOX1/NUDT1/DHFR/EGLN1/MICB/MB/APP/GCH1/PXDN/MAPT/GCLM/PRDX6/PRNP/EIF2S1/MSRB2/CAPN2/UBE3A/ST…
GO_SINGLE_STRANDED_DNA_BINDING	35	0.50895	1.77152	0.00210109	0.0472687	0.0411395	YBX1/LONP1/HNRNPA1/SUB1/HNRNPA2B1/HNRNPK/HSF1/RAD23A/RAD23B/SETMAR/HMGB1/ANXA1/PURB/TOP1/TDP1/PURA/HSPD1/HMGB2/TERF1/MAPT
GO_REGULATION_OF_CELLULAR_PROTEIN_LOCALIZATION	212	0.323216	1.4981	0.0021305	0.0475032	0.0413436	PRKCZ/BCL2/HSP90AA1/TGFB1/BDNF/HSP90AB1/NUCB1/UBE2L3/YWHAQ/PTGS2/YWHAH/GLUL/HTRA2/PDCD5/KCNAB2/BAG4/STX8/GZMB/BID/BMP4/MAPK14/STX3/PTN/CRKL/PRKCI/PARK7/RDX/TAX1BP3/ERLEC1/GPC2/IL1B/GBP1/YWHAB/VTI1B/CNPY4/PPP3R1/EZR/CHP1/BAD/ATAD1/STX7/SFN/FLNA/STX4/CSNK2A2/GPC6/STOM/BRSK2/APOD/PTPN11/ACTN2/DAG1/DPP10/CSRP3/EPHA2/YWHAG/TERF1/YWHAZ/CAV3/MAPT/ANP32B/NSFL1C/PTPN1/UBXN2B/RAN/PRNP/GDI1/CLTC/EPB41/LILRB…
GO_NIK_NF_KAPPAB_SIGNALING	79	0.409471	1.66608	0.00213459	0.0475032	0.0413436	PSMA6/PSMA2/PSMA1/TNFRSF10B/PSME2/CD14/IL18/HAVCR2/PSME1/EDN1/ALK/PSMB4/CALR/EDAR/TNFSF15/PSMD7/SKP1/IL1B/CHI3L1/IL18R1/HMGB1/LGALS9/PSMA7/GREM1/TNFRSF10A/RPS3/PSMD10/AGO3/AGO1/APP/PSMD11/PSME3/MMP8/RHOA/PSMB1
GO_MODIFICATION_DEPENDENT_PROTEIN_BINDING	27	0.552767	1.81261	0.00217057	0.0480443	0.0418145	BRD4/UBQLN4/WDR5/UBQLN2/DNAJB2/ING1/PTPN6/RBBP5/RAD23A/RAD23B/L3MBTL2/BRD2
GO_TRANSCRIPTION_FACTOR_BINDING	172	0.339357	1.53827	0.00221266	0.0484658	0.0421814	PSMA6/BCL2/MED1/GABARAPL1/HDGF/APBB2/BRD4/IFI16/KAT2B/NR1D1/YWHAH/RBL2/HNRNPD/SUMO2/PCNA/CEBPA/FKBP4/DLL1/IRF4/MAPK14/HNRNPF/CALR/APEX1/ID2/PARK7/STAT1/RBFOX2/JUND/TBP/NAB2/UBA2/FOXO3/HMGB1/FLNA/TNFRSF10A/AIP/HMGA2/RPS3/PSMD10/HDAC2/BPTF/TEAD4/PURB/COMMD7/ANXA4/PIAS4/CREBBP/HIF1AN/PURA/EDF1/HMGB2/ELK1/CEBPG/NR1D2/TRIB2/YWHAZ
GO_INTERSPECIES_INTERACTION_BETWEEN_ORGANISMS	380	0.288832	1.40712	0.00222188	0.0484658	0.0421814	VIM/BCL2/EFNB3/CLEC7A/CTSG/TGFB1/G3BP2/HSP90AB1/RPS27A/CD4/RPL12/TBK1/ULBP3/G3BP1/ILF3/PSIP1/XRCC4/SHC1/HNRNPA1/BRD4/HSPA1A/HSPA8/XRCC6/EIF3G/IFI16/KAT2B/ISG15/FURIN/STAU1/CCNA2/HNRNPK/RPL30/RPS7/SCARB2/PCNA/GNLY/B2M/PABPN1/RNGTT/INHBB/CEBPA/ULBP1/ELANE/IL2RG/S100A12/HSPA1B/PTX3/DDX39B/PSMB4/CCL13/LCK/STAT1/REG3A/NR5A2/RPS4X/HAMP/TBP/MX1/PLG/REG1B/RAD23A/CXCL8/AP2A2/SKP1/TARBP2/YWHAB/REG1A/GAPDH/…
GO_POSITIVE_REGULATION_OF_INTRINSIC_APOPTOTIC_SIGNALING_PATHWAY	24	0.572107	1.8231	0.00222493	0.0484658	0.0421814	SOD1/BCL2/MCL1/RPS7/BID/LCK/PARK7/PTPN2/BAD/RPS3/S100A9/PIAS4/UBB
GO_MYELOID_CELL_DIFFERENTIATION	174	0.33709	1.53067	0.00225328	0.048825	0.042494	IL11/TGFB1/MED1/IL4/CD4/HSPA1A/CSF1/IFI16/DPY30/WDR5/KAT2B/ISG15/PABPC4/PRTN3/CEBPA/PTPN6/HSPA1B/TNRC6B/BMP4/DLL1/IRF4/GNAS/MAPK14/FSTL3/ID2/RBBP5/ASH2L/STAT1/RBFOX2/PTPN2/TESC/BATF/SFRP1/ANXA2/RNF41/FOXO3/PRDX3/JAG1/IL15/CCL3/EFNA4/IL23R/PURB/AGO3/IL20/THBS1/THPO/VEGFA/HSPA9/CREBBP/PTPN11/PRKCQ/AGO1/EPHA2/CSF3R/MB/APP/ROR2/HMGB2/CEBPG/IL31RA
GO_TRANSLATION_REGULATOR_ACTIVITY_NUCLEIC_ACID_BINDING	32	0.521057	1.77818	0.00227407	0.0490175	0.0426615	EIF3G/EIF1AX/EIF1AD/EIF5/DENR/EIF4E2/EEF1B2/PURA/EIF4A1/EIF5A/DHFR/EIF4G2/EIF5A2/TYMS/EIF1AY/EIF2S1/EIF4B/MTRF1L/SHMT1/EIF4A2/EIF4H
GO_PROTEIN_INSERTION_INTO_MITOCHONDRIAL_MEMBRANE_INVOLVED_IN_APOPTOTIC_SIGNALING_PATHWAY	18	0.618736	1.83625	0.00231626	0.049667	0.0432268	BCL2/YWHAQ/YWHAH/GZMB/BID/YWHAB/PPP3R1/BAD/SFN/YWHAG/YWHAZ

## Sheet: Table S3.
Supplementary Table 3. List of proteins included in senescence asssociated secretory phenotype (SASP) protein sets.
SASP1 consists of 174 proteins secreted by human lung fibroblasts after irradiation, RAS overexpression, or atazanavir-induced senescence (Basisty et al, PLoS Biology, 2020). A total of 130 of the 174 proteins were in the SOMAscan platform. Since SASP1 is not a formal gene ontology term or pathway, a comprehensive validation list of SASP proteins, SASP2, was also generated from an unbiased PubMed…
SASP-1	SASP-2
AARS	A2M
ACTB;ACTG1	ACTN1
ACTBL2	ACTN4
ACTN1	ACTR3
ACTN4	ADAM10
AGRN	ADAM17
AHNAK	ADAM9
AKR1A1	ADH5
AKR1B1	ADIPOQ
ALCAM	AEBP1
ALDOA	AFP
ALDOC	AGRN
APP	AHCY
ARHGDIA	AHNAK
BASP1	AHSG
BGN	AK3
C1S	AKR1B1
C3	ALDH1A1
CALD1	ALDOA
CALM1	ANG
CALR	ANPEP
CALU	ANXA1
CAP1	ANXA2
CD44	ANXA5
CLEC11A	APOD
CLIC1	APP
COL12A1	AREG
COL6A1	ARHGDIA
COL6A2	ARPC1B
COL6A3	ARPC2
COPA	ARPC4
CORO1C	ATP6AP2
COTL1	AXL
CST3	B2M
CTHRC1	B4GALT1
CTSB	BASP1
CTSD	BCL10
CTSZ	BCL2
CXCL1	BCL6
DPYSL2	BGN
ECM1	BMP2
EEF2	BMP4
EFEMP2	BMP6
EIF4A1	BOLA2
EMILIN1	BTC
ENO1	C1R
ENO3	C1S
EZR	C3
FBN1	C3
FKBP10	CALD1
FKBP1A	CALR
FLNA	CALU
FLNB	CASP8
FLNC	CCDC80
FN1	CCL1
GANAB	CCL11
GAPDH	CCL12
GDF15	CCL13
GDI2	CCL16
GLO1	CCL17
GPI	CCL18
GSN	CCL19
GSTO1	CCL2
GSTP1	CCL20
HEXA	CCL22
HEXB	CCL25
HMGA1	CCL26
HMGB1	CCL27
HNRNPA2B1	CCL28
HSP90AA1	CCL3
HSP90AB1	CCL4
HSP90B1	CCL5
HSPA1A;HSPA1B	CCL7
HSPA5	CCL8
HSPA8	CD14
HSPE1	CD248
HSPG2	CD44
IGF2	CD59
IGFBP2	CD81
IGFBP3	CDC42
IGFBP4	CDH11
IGFBP5	CFH
IGFBP7	CFL1
IQGAP1	CHI3L1
KRT10	CHI3L2
KRT2	CHID1
LAMB1	CKAP4
LASP1	CLCP1
LDHA	CLEC11A
LDHB	CLEC3B
LGALS1	CLIC1
LGALS3BP	CLIC4
LMNA	CLSTN1
LOXL2	CLTC
LTBP1	CLU
MDH1	CNBP
MDH2	CNN2
MIF	CNTF
MMP1	COL12A1
MMP2	COL15A1
MRC2	COL18A1
MSN	COL18A1
MYDGF	COL1A1
MYH9	COL1A2
MYL12B;MYL12A	COL3A1
MYL6	COL4A2
NID2	COL5A1
NME2	COL5A2
NPC2	COL6A1
NPM1	COL6A2
NUCB1	COL6A3
P4HB	CORO1C
PARK7	CRABP2
PDIA3	CSF1R
PDLIM1	CSF2
PEBP1	CSF3
PFN1	CSRP1
PGAM1	CST1
PGK1	CST3
PKM	CST4
PLEC	CTHRC1
PLOD1	CTSB
PLOD2	CTSC
PLOD3	CTSD
PLS3	CTSL
POSTN	CTSZ
POTEF	CXCL1
PPIA	CXCL10
PPIB	CXCL11
PRCP	CXCL12
PRDX1	CXCL13
PRDX2	CXCL2
PRDX6	CXCL3
PRKCSH	CXCL5
PSAP	CXCL6
PSMA3	CXCL8
PSMB6	CXCL9
PSME1	DAG1
PTX3	DCN
PXDN	DKK1
QSOX1	DKK3
RCN1	DPYSL2
S100A11	DSTN
SERPINE1	ECM1
SERPING1	EEF1A1
SERPINH1	EEF1B2
SH3BGRL3	EEF1D
SOD1	EEF1G
STC1	EEF2
TAGLN	EFEMP1
TAGLN2	EFEMP2
TALDO1	EGF
TBCA	EGFR
TGFBI	EHD2
THBS1	EMILIN1
TIMP1	ENO1
TIMP2	ENPP2
TKT	ERAP1
TLN1	EREG
TNC	ESM1
TPD52L2	ESR2
TPI1	EZR
TPM2	FAM129B
TXNRD1	FAM3C
UCHL1	FAS
VASN	FBLN1
VCAN	FBLN2
VCL	FBLN5
VIM	FBN1
WDR1	FGF1
YWHAB	FGF2
YWHAE	FGF7
YWHAQ	FGF9
YWHAZ	FHL1
	FKBP10
	FKBP7
	FKBP9
	FLNA
	FLNB
	FLNC
	FN1
	FSCN1
	FST
	FSTL1
	FSTL3
	FUCA2
	FUT11
	GAL
	GALNT2
	GANAB
	GAPDH
	GATD3A
	GBA
	GBP1
	GC
	GDF15
	GDI2
	GDNF
	GLO1
	GLRX
	GM2A
	GNS
	GPC1
	GPI
	GSN
	GSTO1
	GSTP1
	H2AFJ
	HEXB
	HGF
	HIST1H4A
	HIST2H3A
	HMGB1
	HNRNPA1
	HNRNPC
	HNRNPD
	HNRNPK
	HSP90AA1
	HSP90AB1
	HSP90B1
	HSPA13
	HSPA4
	HSPA5
	HSPA8
	HSPB1
	HSPG2
	HTRA1
	ICAM1
	ICAM3
	IFNA1
	IFNG
	IGF1
	IGF2
	IGFBP1
	IGFBP2
	IGFBP3
	IGFBP4
	IGFBP5
	IGFBP6
	IGFBP7
	IL10
	IL11
	IL12B
	IL13
	IL15
	IL17A
	IL1A
	IL1B
	IL1RL1
	IL1RN
	IL2
	IL2RA
	IL3
	IL4
	IL5
	IL6
	IL6R
	IL6ST
	IL7
	IL8
	IL9
	ILF2
	INHA
	INHBA
	IQGAP1
	ISLR
	ITGB1
	ITIH5
	KDR
	KITLG
	LAMA2
	LAMA4
	LAMA5
	LAMB1
	LAMB2
	LAMC1
	LAMC2
	LASP1
	LDHA
	LDHB
	LEP
	LGALS1
	LGALS3
	LGALS3BP
	LIF
	LMAN2
	LMNA
	LOX
	LOXL1
	LOXL2
	LTA4H
	LTBP1
	LTBP3
	LTBP4
	LUM
	MAMDC2
	MAN1C1
	MAP2K2
	MAP4
	MASP1
	MDH1
	MDH2
	MFGE8
	MIF
	MINPP1
	MMP1
	MMP10
	MMP11
	MMP12
	MMP13
	MMP19
	MMP2
	MMP23
	MMP3
	MMP7
	MOXD1
	MRC2
	MSN
	MUC16
	MVP
	MXRA5
	MYDGF
	MYH9
	MYL12A
	MYL6
	MYL9
	NAMPT
	NBL1
	NCL
	NEU1
	NGF
	NID1
	NID2
	NME2
	NPEPPS
	NPM1
	NPTX1
	NRG1
	NRP1
	NT5E
	NTM
	NTNG1
	NUCB1
	NUCB2
	OAF
	OLFM1
	OSM
	P4HA1
	P4HB
	PABPC1
	PAM
	PAMR1
	PAPPA
	PARK7
	PCBP1
	PCNA
	PCOLCE
	PDGFA
	PDGFB
	PDIA3
	PDIA4
	PDIA6
	PDLIM7
	PEBP1
	PF4
	PFN1
	PGAM1
	PGF
	PGK1
	PGM1
	PI3
	PIGF
	PKM
	PLAT
	PLAU
	PLAUR
	PLEC
	PLIN3
	PLOD1
	PLOD3
	PLS3
	POFUT1
	POSTN
	PPBP
	PPIA
	PPIB
	PRAP1
	PRDX1
	PRDX2
	PRDX6
	PRELP
	PRKCSH
	PROCR
	PRSS23
	PSAP
	PSG5
	PSMA2
	PSMA4
	PSMA5
	PSMA7
	PSMB4
	PSME1
	PTK7
	PTRF
	PTX3
	PVR
	PXDN
	PYGL
	QPCT
	QSOX1
	RAD23B
	RARRES2
	RCN1
	RCN3
	RECK
	RGMB
	RNASE4
	RNH1
	RPL10A
	RPL12
	RPLP0
	RPLP1
	RPLP2
	RPS12
	RPS28
	RPS3
	RPS8
	RPS9
	RPSA
	RRBP1
	S100A11
	S100A4
	S100A6
	SCG2
	SDC4
	SDF4
	SELL
	SELP
	SEMA5A
	SEMA6D
	SEMA7A
	SERPINA1
	SERPINB2
	SERPINB2
	SERPINE1
	SERPINE2
	SERPINF1
	SERPING1
	SERPINH1
	SFPQ
	SFRP1
	SH3BGRL
	SH3BGRL3
	SIL1
	SIRPA
	SOD1
	SOD3
	SPARC
	SPINK1
	SPOCK1
	SPON2
	SPP1
	SRPX
	SRPX2
	STAT1
	STC1
	STC2
	SVEP1
	SYNCRIP
	TAGLN
	TAGLN2
	TALDO1
	TFPI
	TFPI2
	TFRC
	TGFB1
	TGFB2
	TGFBI
	THBS1
	THBS2
	THPO
	THY1
	TIMP1
	TIMP2
	TIMP4
	TKT
	TLN1
	TMSB4X
	TNC
	TNF
	TNFAIP1
	TNFRSF10C
	TNFRSF11B
	TNFRSF18
	TNFRSF1A
	TNFRSF1B
	TNFSF10
	TPI1
	TPM3
	TPM4
	TPST1
	TUBA1A
	TUBA1C
	TUBB
	TUBB4B
	TXN
	TXNDC17
	TXNDC5
	TXNRD1
	TYRO3
	UBA1
	UBE2N
	UBE2V1
	UCHL1
	UGP2
	VASN
	VAT1
	VCAM1
	VCL
	VCP
	VEGFA
	VEGFC
	VEGFD
	VIM
	WARS
	WDR1
	WNT5A
	XCL1
	XRCC5
	YWHAB
	YWHAE
	YWHAH
	YWHAQ
	YWHAZ
	ZYX

## Sheet: Table S4_Padj ranked.
Supplementary Table 4. Plasma proteins differentially expressed with cardiac involvement in moderate COVID-19.
Plasma proteomic profiles of moderate COVID-19 patients with cardiac involvement (n=12) were compared to COVID-19 patients with similar moderate disease severity but without cardiac involvement (n=13). Relative differences in protein levels are shown as log2(fold change). Padj < 0.05 after Benjamini-Hochberg correction was considered significant.
proteinID	EntrezSymbol	EntrezID	UniProtID	logFC	P.Value	adj.P.Val
CA10.13666.222	CA10	56934	Q9NS85	-0.733593	6.26835e-06	0.0172867
HIST3H2A.14144.3	HIST3H2A		Q7L7L0	1.64433	1.00966e-05	0.0172867
NPPB.7655.11	NPPB	4879	P16860	2.14505	1.16196e-05	0.0172867
TAGLN.15640.54	TAGLN	6876	Q01995	1.34583	1.68231e-05	0.0172867
SUMO2.19555.1	SUMO2	6613	P61956	1.49857	1.73005e-05	0.0172867
SHC1.5272.55	SHC1	6464	P29353	0.837524	2.58608e-05	0.0189464
HSPB6.19127.1	HSPB6	126393	O14558	1.37923	2.65462e-05	0.0189464
APOF.12370.30	APOF	319	Q13790	1.49062	6.7742e-05	0.0358442
IBSP.3415.61	IBSP	3381	P21815	1.7337	7.19348e-05	0.0358442
LCN2.2836.68	LCN2	3934	P80188	1.22461	7.52603e-05	0.0358442
FABP3.5437.63	FABP3	2170	P05413	1.24162	8.88247e-05	0.0358442
RNASE1.7211.2	RNASE1	6035	P07998	2.13114	9.08951e-05	0.0358442
STMN2.10900.272	STMN2	11075	Q93045	1.26628	9.50449e-05	0.0358442
DBI.16919.1	DBI	1622	P07108	1.12955	0.000100444	0.0358442
SRA1.18220.141	SRA1	10011	Q9HD15	0.882012	0.000145275	0.0474662
IGFBP2.8469.41	IGFBP2	3485	P18065	1.26194	0.000152013	0.0474662
FSTL3.3438.10	FSTL3	10272	O95633	0.893185	0.000164519	0.0483492
HIST2H2BE.14143.8	HIST2H2BE	8349	Q16778	1.11041	0.000179782	0.0498994
PRKCSH.5687.5	PRKCSH	5589	P14314	0.721046	0.000200982	0.0528477
GABARAP.17735.130	GABARAP	11337	O95166	0.902822	0.000218496	0.0545804
HIST3H2BB.18823.52	HIST3H2BB	128312	Q8N257	1.40028	0.000233174	0.0554732
MYL6B.14227.21	MYL6B	140465	P14649	1.4107	0.000268612	0.0609993
ESM1.3805.16	ESM1	11082	Q9NQ30	1.09373	0.000294043	0.0634025
TNRC6B.9808.41	TNRC6B	23112	Q9UPQ9	0.579417	0.00033583	0.0634025
PPP1R1A.17706.4	PPP1R1A	5502	Q13522	0.686686	0.000339398	0.0634025
PCOLCE.11237.49	PCOLCE	5118	Q15113	0.689645	0.00034077	0.0634025
FABP4.15386.7	FABP4	2167	P15090	1.07517	0.000348591	0.0634025
PSIP1.17176.13	PSIP1	11168	O75475	0.696998	0.000355338	0.0634025
RPL12.19183.164	RPL12	6136	P30050	0.75612	0.000399185	0.0667314
NDUFV2.7748.11	NDUFV2	4729	P19404	0.75505	0.000400709	0.0667314
C9orf89.7778.104	C9orf89	84270	Q96LW7	0.390702	0.000512904	0.0825379
GSTP1.4911.49	GSTP1	2950	P09211	0.802842	0.000541806	0.0825379
RNASE10.5602.62	RNASE10	338879	Q5GAN6	0.462653	0.000547772	0.0825379
SMAD4.12022.12	SMAD4	4089	Q13485	0.555616	0.00057797	0.0825379
SUMO3.14623.26	SUMO3	6613	P55854	0.811859	0.000578228	0.0825379
CHCHD10.11270.17	CHCHD10		Q8WYQ3	0.697833	0.000603775	0.0837905
JAM2.2997.8	JAM2	58494	P57087	0.452151	0.00065848	0.0889127
SELM.15336.7	SELM		Q8WWX9	0.838126	0.000702881	0.0924104
HDGF.16758.96	HDGF	3068	P51858	0.860974	0.000771319	0.0960422
VEGFC.3132.1	VEGFC	7424	P49767	0.379618	0.000779157	0.0960422
LRRC52.10785.8	LRRC52	440699	Q8N7C0	-1.23077	0.000788176	0.0960422
EIF1AD.13545.97	EIF1AD	84285	Q8N9N8	0.686105	0.000837009	0.0995642
OIT3.6296.36	OIT3	170392	Q8WWZ8	0.904371	0.000874802	0.0996768
COL4A3BP.13950.9	COL4A3BP	10087	Q9Y5P4	0.744442	0.000877858	0.0996768
TSTD1.19277.4	TSTD1	100131187	Q8NFU3	0.934426	0.000924877	0.100317
DNAJB2.11438.6	DNAJB2		P25686	0.555034	0.000936101	0.100317
TSPEAR.10546.2	TSPEAR	54084	Q8WU66	-0.507141	0.000943736	0.100317
EIF3G.11454.87	EIF3G	8666	O75821	0.750536	0.000995409	0.10077
GABARAPL1.12661.44	GABARAPL1		Q9H0R8	0.780294	0.00102293	0.10077
PAFAH1B2.2642.4	PAFAH1B2	5049	P68402	0.60124	0.00104254	0.10077
HNRNPK.19333.4	HNRNPK	3190	P61978	0.70851	0.00108148	0.10077
LYZ.4920.10	LYZ	4069	P61626	1.16395	0.00109326	0.10077
GUSB.15562.24	GUSB	2990	P08236	-1.09891	0.00112513	0.10077
PDCD5.12517.52	PDCD5	9141	O14737	0.681611	0.00115182	0.10077
JAM3.2998.53	JAM3	83700	Q9BX67	0.468338	0.00115418	0.10077
REG3A.15304.1	REG3A	5068	Q06141	1.34395	0.00117519	0.10077
GLRX.18386.36	GLRX	2745	P35754	0.585424	0.00117609	0.10077
TSSC4.18181.2	TSSC4	10078	Q9Y5U2	0.768731	0.0011781	0.10077
NELL1.6544.33	NELL1	4745	Q92832	-1.09022	0.00119004	0.10077
ITPRIPL1.9221.6	ITPRIPL1	150771	Q6GPH6	0.703096	0.00123664	0.10256
CNN1.15566.10	CNN1	1264	P51911	0.477533	0.00125224	0.10256
SEPT11.12620.3	2020-09-11	55752	Q9NVA2	0.387057	0.00136825	0.110254
SNRPG.19276.124	SNRPG	6637	P62308	0.753635	0.00143924	0.112162
CSRP3.9171.11	CSRP3	8048	P50461	1.08825	0.00145638	0.112162
PGR.15693.9	PGR	5241	P06401	0.829633	0.00145927	0.112162
RNASE6.5646.20	RNASE6	6039	Q93091	0.898535	0.0014955	0.113205
REG1B.16770.3	REG1B	5968	P48304	0.788443	0.00155366	0.115852
CST3.2609.59	CST3	1471	P01034	0.775804	0.00159005	0.116822
MYL3.18376.19	MYL3	4634	P08590	1.57765	0.00163522	0.118399
SERPINB8.19130.81	SERPINB8	5271	P50452	0.834005	0.00168163	0.118868
B2M.3485.28	B2M	567	P61769	0.987592	0.00168928	0.118868
HNRNPDL.10852.114	HNRNPDL	9987	O14979	0.806663	0.0018376	0.127509
LONP1.6398.12	LONP1	9361	P36776	0.789841	0.00189718	0.12984
MB.3042.7	MB	4151	P02144	0.93229	0.00192784	0.130155
LST1.9531.24	LST1	7940	O00453	0.832411	0.00197235	0.130446
OLFM2.19377.14	OLFM2	93145	O95897	-1.16727	0.0020072	0.130446
CBR1.12381.26	CBR1	873	P16152	0.860892	0.00201048	0.130446
EDAR.2977.7	EDAR	10913	Q9UNE0	0.402036	0.00221492	0.141869
TFRC.8795.48	TFRC	7037	P02786	0.884459	0.00225881	0.142312
SPG20.11161.5	SPG20		Q8N0X7	0.458004	0.00227881	0.142312
PTPN6.4318.12	PTPN6	5777	P29350	0.732922	0.00232536	0.143426
RPLP2.10949.59	RPLP2	6181	P05387	0.391202	0.0024491	0.149216
ADAMTS6.6441.62	ADAMTS6	11174	Q9UKP5	0.502854	0.00248332	0.149223
EPOR.19575.4	EPOR	2057	P19235	0.385046	0.00250896	0.149223
CTHRC1.15467.10	CTHRC1	115908	Q96CG8	0.535082	0.00260649	0.1532
HINT1.5900.11	HINT1	3094	P49773	0.448368	0.00265327	0.154137
MAP1LC3A.17781.191	MAP1LC3A	84557	Q9H492	0.644921	0.00273323	0.156957
GM2A.15441.6	GM2A	2760	P17900	0.842781	0.00279093	0.157241
VWA2.7128.9	VWA2	340706	Q5GFL6	-0.512302	0.00284433	0.157241
EFNB1.13104.32	EFNB1	1947	P98172	0.649364	0.00286933	0.157241
C5orf63.13378.80	C5orf63		A6NC05	-0.364733	0.00288018	0.157241
RAD23A.10058.1	RAD23A	5886	P54725	0.627119	0.0029054	0.157241
CLSTN3.6291.55	CLSTN3	9746	Q9BQT9	0.921045	0.00298117	0.157241
G3BP1.19266.35	G3BP1	10146	Q13283	0.517666	0.00299427	0.157241
PIN4.12718.43	PIN4	5303	Q9Y237	0.791471	0.00299696	0.157241
MARCO.9003.99	MARCO	8685	Q9UEW3	-0.409962	0.00302145	0.157241
NPDC1.10424.31	NPDC1	56654	Q9NQX5	0.65113	0.00306652	0.157941
HIST1H3A.14146.92	HIST1H3A	8350	P68431	1.17197	0.00315061	0.159376
SH3BGRL.12693.2	SH3BGRL	6451	O75368	0.501028	0.00315817	0.159376
TFF3.4721.54	TFF3	7033	Q07654	1.01224	0.00321237	0.159555
REG1A.13095.51	REG1A	5967	P05451	1.12989	0.00322559	0.159555
TNNT2.5315.22	TNNT2	7139	P45379	1.09253	0.0034641	0.168254
PTN.3045.72	PTN	5764	P21246	1.45991	0.00347198	0.168254
ACYP2.12812.25	ACYP2	98	P14621	0.733283	0.00350963	0.168254
NUDT3.12796.44	NUDT3		O95989	0.49244	0.00356278	0.168254
THSD7A.11174.8	THSD7A	221981	Q9UPZ6	-0.523055	0.00357516	0.168254
TMX3.5654.70	TMX3	54495	Q96JJ7	0.562182	0.00360352	0.168254
STX12.10418.36	STX12	23673	Q86Y82	0.829881	0.0037021	0.171256
CEACAM8.18873.8	CEACAM8	1088	P31997	0.524283	0.00379459	0.172603
PCDHGA10.6321.65	PCDHGA10	56106	Q9Y5H3	0.720988	0.0038003	0.172603
RBFOX2.11462.8	RBFOX2	23543	O43251	0.610776	0.00391399	0.173725
PDAP1.19240.265	PDAP1	11333	Q13442	1.00534	0.00396105	0.173725
LEMD1.8040.9	LEMD1	93273	Q68G75	0.66418	0.00397144	0.173725
AIF1L.18871.24	AIF1L	83543	Q9BQI0	0.631222	0.00399478	0.173725
TNC.6259.60	TNC	3371	P24821	0.652399	0.00399886	0.173725
RAD23B.12522.6	RAD23B	5887	P54727	0.552942	0.00412561	0.177372
DEFA5.16785.45	DEFA5	1670	Q01523	0.954856	0.00415382	0.177372
LYG1.9243.10	LYG1	129530	Q8N1E2	0.978329	0.00423551	0.179327
CBX7.13027.20	CBX7		O95931	0.380709	0.0043034	0.18067
CILP.5717.2	CILP	8483	O75339	0.709267	0.0043964	0.183037
STMN1.17367.5	STMN1	3925	P16949	0.57783	0.0044789	0.184755
BAGE2.6294.11	BAGE2	85319	Q86Y30	0.757329	0.00451162	0.184755
PFDN2.19243.2	PFDN2	5202	Q9UHV9	0.657227	0.00463556	0.188287
RNF150.9774.59	RNF150	57484	Q9ULK6	-0.668328	0.00477497	0.189864
HSPA1A.10803.22	HSPA1A	3303	P0DMV8	0.702824	0.00480048	0.189864
VPS24.12508.9	VPS24	51652	Q9Y3E7	0.538967	0.00480274	0.189864
DSC2.13126.52	DSC2	1824	Q02487	0.752916	0.0048264	0.189864
NPPB.16751.15	NPPB	4879	P16860	0.664146	0.00489436	0.191033
RBP7.14208.3	RBP7		Q96R05	0.818521	0.004939	0.191281
CEACAM20.10453.7	CEACAM20	125931	Q6UY09	-0.369915	0.00519652	0.199477
DNAJC4.8016.19	DNAJC4	3338	Q9NNZ3	-0.298839	0.00523048	0.199477
TAX1BP3.12498.12	TAX1BP3		O14907	0.490148	0.00529374	0.20036
TAC1.9337.43	TAC1	6863	P20366	0.636615	0.00552554	0.207561
TEAD4.12516.13	TEAD4		Q15561	0.325468	0.00560335	0.208113
UBE2E1.14326.4	UBE2E1	7324	P51965	0.62224	0.00563036	0.208113
TNFRSF1B.8368.102	TNFRSF1B	7133	P20333	0.753435	0.0056652	0.208113
ABHD14A.5715.4	ABHD14A	25864	Q9BUJ0	0.697235	0.00570761	0.20814
BOLA1.15370.5	BOLA1	51027	Q9Y3E2	0.50569	0.00576244	0.208617
GHR.2948.58	GHR	2690	P10912	-0.524944	0.00582525	0.209374
GUCA2B.6223.5	GUCA2B	2981	Q16661	0.877112	0.00588633	0.210058
SRL.10940.25	SRL	6345	Q86TD4	0.602138	0.00595595	0.211035
SRSF7.12987.12	SRSF7		Q16629	0.687198	0.00617613	0.217295
DTD2.18280.29	DTD2	112487	Q96FN9	0.56233	0.00641253	0.224035
MAP2K2.3628.3	MAP2K2	5605	P36507	0.721953	0.00647801	0.224751
H2AFZ.4163.5	H2AFZ	3015	P0C0S5	0.804917	0.0065571	0.225166
TMPO.8265.225	TMPO	7112	P42167	0.875445	0.00662109	0.225166
EDN1.6495.14	EDN1	1906	P05305	0.326767	0.00662519	0.225166
DHX8.11601.26	DHX8		Q14562	0.387499	0.00669546	0.226017
PXDN.13463.1	PXDN	7837	Q92626	1.23237	0.0067481	0.226265
ASAH1.5748.20	ASAH1	427	Q13510	0.576522	0.00684401	0.227181
HDGFRP2.4553.65	HDGFRP2	84717	Q7Z4V5	0.469492	0.00686635	0.227181
HDGF.8953.47	HDGF	3068	P51858	0.672859	0.00695549	0.228384
RBM3.12747.89	RBM3	5935	P98179	0.662502	0.00702527	0.228384
WWOX.17724.3	WWOX	51741	Q9NZC7	0.830858	0.00703985	0.228384
COL28A1.10702.1	COL28A1	340267	Q2UY09	0.769728	0.00722247	0.232797
ELK3.5707.55	ELK3	2004	P41970	0.70725	0.00734843	0.235338
WSCD2.6274.15	WSCD2	9671	Q2TBF2	0.47493	0.00744147	0.2368
CA3.3799.11	CA3	761	P07451	1.09187	0.00777138	0.245733
BID.5798.3	BID	637	P55957	0.480613	0.007915	0.2487
EWSR1.12988.49	EWSR1	2130	Q01844	0.81282	0.00810879	0.251554
RPS27A.2846.24	RPS27A	6233	P62979	0.786907	0.00812998	0.251554
RELT.14112.40	RELT	84957	Q969Z4	0.334058	0.00815688	0.251554
WISP2.6392.7	WISP2	8839	O76076	0.553859	0.00831041	0.25293
YBX1.9751.72	YBX1	4904	P67809	0.834409	0.00834603	0.25293
COL18A1.2201.17	COL18A1	80781	P39060	0.565369	0.0083614	0.25293
FAM150B.6284.7	FAM150B	285016	Q6UX46	0.604824	0.00840399	0.25293
UBXN2B.18435.40	UBXN2B	137886	Q14CS0	0.618746	0.00866747	0.257579
TNFRSF1B.3152.57	TNFRSF1B	7133	P20333	0.745694	0.00873421	0.257579
TIMM8A.19148.58	TIMM8A	1678	O60220	0.543484	0.00875914	0.257579
PCNP.17769.28	PCNP	57092	Q8WW12	0.645574	0.00876471	0.257579
ADM.7922.5	ADM	133	P35318	0.416321	0.00882368	0.257796
PI3.4982.54	PI3	5266	P19957	1.08224	0.00900826	0.261659
SIRPB2.5669.26	SIRPB2	284759	Q5JXA9	0.53515	0.00909577	0.262673
RNASE2.8394.56	RNASE2	6036	P10153	0.35057	0.00924828	0.265543
ADSS.12644.63	ADSS		P30520	0.67693	0.00944	0.269499
PLCG2.10070.22	PLCG2	5336	P16885	0.492463	0.00955169	0.271138
LY6G6C.6256.9	LY6G6C	80740	O95867	0.644048	0.00964245	0.272168
STMN3.8019.73	STMN3	50861	Q9NZ72	0.53288	0.00978869	0.274743
CDNF.4962.52	CDNF	441549	Q49AH0	0.451307	0.010086	0.279875
SRGN.19251.56	SRGN	5552	P10124	0.543281	0.0101146	0.279875
WFDC3.6384.19	WFDC3	140686	Q8IUB2	0.578367	0.0101971	0.279875
INHBB.16746.12	INHBB	3625	P09529	0.388408	0.0102396	0.279875
CMPK1.18243.9	CMPK1	51727	P30085	0.499707	0.0102516	0.279875
LMAN2.9468.8	LMAN2	10960	Q12907	0.676305	0.0104994	0.283567
ADPRHL2.17332.3	ADPRHL2	54936	Q9NX46	0.63914	0.0105004	0.283567
HNRNPD.18348.89	HNRNPD	3184	Q14103	0.81244	0.0106925	0.284968
PABPC3.10447.18	PABPC3	5042	Q9H361	0.499847	0.0106934	0.284968
RHOB.18166.4	RHOB	388	P62745	0.465119	0.010769	0.284968
TMED10.6506.54	TMED10	10972	P49755	0.723232	0.0108278	0.284968
CAPG.4968.50	CAPG	822	P40121	0.969166	0.0108654	0.284968
UBQLN2.19121.3	UBQLN2	29978	Q9UHD9	0.508919	0.0108945	0.284968
HNRNPF.9764.79	HNRNPF	3185	P52597	0.568293	0.0110532	0.287367
SLC26A7.13979.3	SLC26A7		Q8TE54	0.521898	0.0111248	0.287367
VTI1B.8963.8	VTI1B	10490	Q9UEU0	0.616954	0.0112062	0.287367
ASB9.19601.15	ASB9	140462	Q96DX5	0.753085	0.0112163	0.287367
HNRNPA1.12466.7	HNRNPA1	3178	P09651	0.927407	0.0112761	0.287425
TYMS.5035.7	TYMS	7298	P04818	0.404698	0.0115026	0.29171
VIM.15540.6	VIM	7431	P08670	1.05288	0.0115666	0.291852
LTBP4.13133.73	LTBP4	8425	Q8N2S1	0.603193	0.0116625	0.291936
ASIP.5676.54	ASIP	434	P42127	0.284322	0.0116868	0.291936
GDF11.MSTN.2765.4	GDF11 MSTN		O95390 O14793	-0.385373	0.011825	0.293918
CFC1.3294.55	CFC1	55997	P0CG37	0.271941	0.0120351	0.297661
BDNF.2421.7	BDNF	627	P23560	0.597896	0.0122611	0.299533
ITIH5.8233.2	ITIH5	80760	Q86UX2	-0.516363	0.0122875	0.299533
LTA.LTB.3505.6	LTA LTB	4049 4050	P01374, Q06643	-0.44909	0.012333	0.299533
LRP10.16610.13	LRP10	26020	Q7Z4F1	0.51259	0.0123601	0.299533
CD46.17682.1	CD46	4179	P15529	0.476744	0.0124106	0.299533
EPHB4.15530.33	EPHB4	2050	P54760	0.573628	0.0124957	0.299955
MCL1.10396.6	MCL1	4170	Q07820	0.64496	0.012566	0.299955
MAP3K3.12990.39	MAP3K3	4215	Q99759	0.657545	0.0126087	0.299955
KISS1.6606.61	KISS1	3814	Q15726	-0.356258	0.0126683	0.299955
KAAG1.19492.5	KAAG1	353219	Q9UBP8	-0.370657	0.0128537	0.301501
CTSF.9212.22	CTSF	8722	Q9UBX1	-0.391701	0.0128542	0.301501
GMPR.19254.125	GMPR	2766	P36959	-1.58162	0.0129488	0.302301
AK2.11368.32	AK2	204	P54819	0.732949	0.01305	0.303246
ATP5J.7788.1	ATP5J	522	P18859	0.816909	0.0132817	0.307201
GLRX2.12486.8	GLRX2	51022	Q9NS18	0.328009	0.0134556	0.309788
CST1.5459.33	CST1	1469	P01037	0.679109	0.0135822	0.309909
ITGA1.ITGB1.3503.4	ITGA1 ITGB1	3672 3688	P56199, P05556	0.681718	0.0135849	0.309909
ARHGAP1.11955.1	ARHGAP1	392	Q07960	0.405984	0.0138534	0.314534
SRSF6.11573.3	SRSF6		Q13247	0.582865	0.0140341	0.314534
TREM1.9266.1	TREM1	54210	Q9NP99	0.615735	0.0141204	0.314534
RHPN2.11439.88	RHPN2		Q8IUC4	-0.482979	0.0141578	0.314534
ATOX1.19233.75	ATOX1	475	O00244	0.858999	0.0141704	0.314534
STAU2.12970.35	STAU2	27067	Q9NUL3	0.646509	0.0142583	0.314534
S100A10.15318.75	S100A10	6281	P60903	0.421856	0.0142649	0.314534
ANP32B.4194.26	ANP32B	10541	Q92688	0.319807	0.0143284	0.314534
MDK.2911.27	MDK	4192	P21741	1.74585	0.0143542	0.314534
LRP1.10699.52	LRP1	4035	Q07954	0.366774	0.0144831	0.315972
IL18.5661.15	IL18	3606	Q14116	0.681481	0.0146397	0.317999
RIPK2.8993.151	RIPK2	8767	O43353	0.285258	0.0147474	0.318503
CISD1.7745.3	CISD1	55847	Q9NZ45	0.360443	0.0147904	0.318503
TFF3.8323.163	TFF3	7033	Q07654	0.686005	0.0148952	0.319384
OVCA2.17697.2	OVCA2	124641	Q8WZ82	0.651703	0.0151259	0.322498
PCDHAC2.9361.7	PCDHAC2	56134	Q9Y5I4	0.530387	0.0152304	0.322498
MAP2K1.2864.2	MAP2K1	5604	Q02750	0.3034	0.0152341	0.322498
CSMD2.9971.5	CSMD2	114784	Q7Z408	0.348078	0.0154427	0.325046
KRT20.12975.11	KRT20	54474	P35900	0.724519	0.0155112	0.325046
G3BP2.9831.12	G3BP2	9908	Q9UN86	0.589575	0.0155496	0.325046
NOTUM.8252.2	NOTUM	147111	Q6P988	-0.602366	0.0159809	0.332669
CCL14.2900.53	CCL14	6358	Q16627	0.699661	0.0163159	0.336801
UBE2L3.3874.8	UBE2L3	7332	P68036	0.358755	0.016342	0.336801
UBE2F.18213.30	UBE2F	140739	Q969M7	0.351042	0.0165054	0.336801
TNFRSF1A.2654.19	TNFRSF1A	7132	P19438	0.62838	0.0165596	0.336801
CLMP.10440.26	CLMP	79827	Q9H6B4	0.533885	0.0165784	0.336801
HNRNPAB.8894.80	HNRNPAB	3182	Q99729	0.559168	0.0165862	0.336801
SLC5A8.13691.10	SLC5A8		Q8N695	-0.476532	0.0166513	0.336801
PTPRR.6361.49	PTPRR	5801	Q15256	0.551738	0.016783	0.337069
RMDN1.7096.30	RMDN1	51115	Q96DB5	0.639476	0.0167995	0.337069
ASF1A.18172.71	ASF1A	25842	Q9Y294	0.342094	0.0170034	0.339641
ATG3.18156.7	ATG3	64422	Q9NT62	0.252695	0.0170636	0.339641
RETN.3046.31	RETN	56729	Q9HD89	0.579693	0.0171527	0.340059
IGFLR1.7244.16	IGFLR1	79713	Q9H665	0.81805	0.0175008	0.345589
CUTC.15315.64	CUTC		Q9NTM9	0.381881	0.0176315	0.3468
EIF5A.5888.29	EIF5A	1984	P63241	0.610977	0.017768	0.347384
CTCF.14624.51	CTCF	10664	P49711	0.291382	0.0179853	0.347384
PCDHAC1.7193.98	PCDHAC1	56135	Q9H158	0.352362	0.0180466	0.347384
EDA2R.3083.71	EDA2R	60401	Q9HAV5	0.454578	0.0180642	0.347384
HIST1H1C.2987.37	HIST1H1C	3006	P16403	1.06526	0.0181327	0.347384
CSF3.4840.73	CSF3	1440	P09919	0.83727	0.0181386	0.347384
DNER.9769.48	DNER	92737	Q8NFT8	-0.453305	0.0182076	0.347384
IL18BP.3073.51	IL18BP	10068	O95998	0.692289	0.0182471	0.347384
IFNLR1.7192.37	IFNLR1	163702	Q8IU57	-0.203809	0.018287	0.347384
DDAH1.19392.6	DDAH1	23576	O94760	0.418642	0.018575	0.349989
IARS.12815.9	IARS	3376	P41252	-0.290479	0.0186113	0.349989
PNMT.17204.17	PNMT	5409	P11086	-0.72386	0.0187037	0.349989
ACBD6.19341.36	ACBD6	84320	Q9BR61	0.355537	0.0187045	0.349989
LGR4.16304.6	LGR4		Q9BXB1	-0.330895	0.0187745	0.349989
ING1.3888.8	ING1	3621	Q9UK53	0.295098	0.0188598	0.350273
CELF2.7245.2	CELF2	10659	O95319	0.813603	0.0190127	0.351805
TMEM9.8597.1	TMEM9	252839	Q9P0T7	-0.385905	0.0192899	0.355618
MMP17.2838.53	MMP17	4326	Q9ULZ9	0.578406	0.019881	0.362603
RBL1.12879.5	RBL1	5933	P28749	-0.213576	0.0199062	0.362603
SMURF2.13985.12	SMURF2	64750	Q9HAU4	-0.169914	0.0201238	0.362603
BPI.4126.22	BPI	671	P17213	0.924375	0.0201682	0.362603
CTSA.3179.51	CTSA	5476	P10619	-0.500326	0.0201724	0.362603
MANSC1.9557.5	MANSC1	54682	Q9H8J5	0.464805	0.0202028	0.362603
SOD2.5008.51	SOD2	6648	P04179	-0.331719	0.0202355	0.362603
SMC3.14324.52	SMC3	9126	Q9UQE7	0.756445	0.0202494	0.362603
EGFLAM.12338.27	EGFLAM		Q63HQ2	0.542233	0.0203899	0.363814
NT5C2.11288.26	NT5C2	22978	P49902	0.554298	0.0206649	0.365111
QRFP.6463.59	QRFP	347148	P83859	-0.387699	0.020783	0.365111
APOB.2797.56	APOB	338	P04114	-0.399066	0.0208614	0.365111
IFNL1.4396.54	IFNL1	282618	Q8IU54	0.26367	0.0208643	0.365111
DYNLL2.11493.169	DYNLL2		Q96FJ2	0.6215	0.020936	0.365111
ERH.11614.29	ERH	2079	P84090	0.652317	0.0209471	0.365111
TWF1.12871.10	TWF1	5756	Q12792	0.632833	0.0209741	0.365111
DCTN6.18311.44	DCTN6	10671	O00399	0.530755	0.0210717	0.365536
APOA1BP.16621.77	APOA1BP	128240	Q8NCW5	0.405359	0.0212663	0.367636
ST13.18387.7	ST13	6767	P50502	0.358418	0.0214061	0.368703
LPCAT2.11175.45	LPCAT2		Q7L5N7	0.247108	0.0215509	0.368703
COL6A3.11196.31	COL6A3	1293	P12111	0.727513	0.0215706	0.368703
FGF16.4393.3	FGF16	8823	O43320	0.410199	0.0216233	0.368703
APEX1.9849.13	APEX1	328	P27695	0.667423	0.0218137	0.368928
UBE2J1.6900.30	UBE2J1	51465	Q9Y385	-0.419239	0.0218263	0.368928
SNRPA.12678.66	SNRPA	6626	P09012	0.764968	0.0218689	0.368928
PPIC.18819.21	PPIC	5480	P45877	0.517428	0.0219318	0.368928
KRT1.9931.20	KRT1	3848	P04264	0.786589	0.0220836	0.369594
RERG.17822.57	RERG	85004	Q96A58	0.240195	0.0221194	0.369594
PGLYRP1.3329.14	PGLYRP1	8993	O75594	0.796349	0.022267	0.369997
GAS1.5463.22	GAS1	2619	P54826	0.576075	0.0222917	0.369997
CRH.5614.44	CRH	1392	P06850	0.169575	0.0224006	0.370574
AGFG1.11681.8	AGFG1	3267	P52594	0.578361	0.0226781	0.373233
DAPK2.4355.13	DAPK2	23604	Q9UIK4	0.466969	0.0227107	0.373233
PLA2G2A.2692.74	PLA2G2A	5320	P14555	1.30021	0.0230058	0.375115
ACP1.3858.5	ACP1	52	P24666	0.877706	0.0231456	0.375115
CIRBP.12724.81	CIRBP	1153	Q14011	0.629592	0.0231839	0.375115
BCL2.3412.7	BCL2	596	P10415	0.484168	0.0232213	0.375115
LRP11.6713.4	LRP11	84918	Q86VZ4	0.565603	0.0232892	0.375115
SNX1.8807.13	SNX1	6642	Q13596	-0.276809	0.0233274	0.375115
TESC.12831.21	TESC	54997	Q96BS2	0.391673	0.0233668	0.375115
WFDC10A.13429.3	WFDC10A	140832	Q9H1F0	-0.393611	0.0234398	0.375115
PRTN3.13720.95	PRTN3	5657	P24158	0.608247	0.0235163	0.375115
FOXO3.11540.37	FOXO3	2309	O43524	0.338379	0.0237248	0.375115
ACTN2.9844.138	ACTN2	88	P35609	1.21035	0.023736	0.375115
PTGS2.3761.4	PTGS2	5743	P35354	0.452414	0.0237408	0.375115
ARHGDIB.9846.32	ARHGDIB	397	P52566	0.6554	0.0238014	0.375115
IFNAR1.9183.7	IFNAR1	3454	P17181	-0.507142	0.0239694	0.37548
TWSG1.9234.8	TWSG1	57045	Q9GZX9	0.381849	0.0240448	0.37548
CSF1.3738.54	CSF1	1435	P09603	0.458931	0.0240607	0.37548
IL1RL1.4234.8	IL1RL1	9173	Q01638	1.14495	0.0241298	0.37548
HMGB1.2524.56	HMGB1	3146	P09429	0.542637	0.0242003	0.37548
PQBP1.11432.11	PQBP1		O60828	0.242467	0.0242933	0.375757
EFEMP1.8480.29	EFEMP1	2202	Q12805	0.550898	0.0244288	0.376686
RPS27A.4474.19	RPS27A	6233	P62979	0.520226	0.024541	0.377252
STX6.10945.11	STX6	10228	O43752	0.21031	0.02483	0.380422
CD93.14136.234	CD93	22918	Q9NPY3	0.47498	0.0249228	0.380422
INHBB.13676.46	INHBB	3625	P09529	0.580684	0.0249756	0.380422
STAMBP.19187.21	STAMBP	10617	O95630	0.287471	0.0252749	0.380949
DHH.4389.2	DHH	50846	O43323	0.283928	0.0253004	0.380949
GABARAPL2.12494.99	GABARAPL2		P60520	0.505614	0.0253369	0.380949
CD248.15491.20	CD248	57124	Q9HCU0	0.545119	0.0253787	0.380949
CTSV.3364.76	CTSV	1515	O60911	-0.333706	0.0253915	0.380949
CTLA4.3022.4	CTLA4	1493	P16410	-0.380761	0.0254705	0.38099
CPLX1.18332.17	CPLX1	10815	O14810	0.511996	0.0255918	0.381661
HMGN1.9187.2	HMGN1	3150	P05114	0.5486	0.0261152	0.385616
CREB3L4.11308.8	CREB3L4		Q8TEY5	0.373285	0.0263628	0.385616
GMFG.13062.4	GMFG	9535	O60234	0.793366	0.0263924	0.385616
EPHB6.5078.82	EPHB6	2051	O15197	0.357416	0.0264269	0.385616
SOST.13101.60	SOST	50964	Q9BQB4	0.305879	0.0264601	0.385616
AIMP1.2714.78	AIMP1	9255	Q12904	-0.263231	0.0265065	0.385616
PPIG.18449.33	PPIG	9360	Q13427	-0.596462	0.0265468	0.385616
RAP2A.9885.41	RAP2A	5911	P10114	-0.968038	0.0265891	0.385616
SCT.3728.52	SCT	6343	P09683	-0.156958	0.0266366	0.385616
CDH11.7763.25	CDH11	1009	P55287	-0.24009	0.0267737	0.385616
COX7A2L.9590.10	COX7A2L	9167	O14548	-1.27779	0.026778	0.385616
AS3MT.18417.3	AS3MT	57412	Q9HBK9	-0.243163	0.0267922	0.385616
ULBP3.2747.3	ULBP3	79465	Q9BZM4	0.292576	0.0268801	0.385616
CDH3.2643.57	CDH3	1001	P22223	-0.439644	0.0269376	0.385616
DDX39B.9742.59	DDX39B	7919	Q13838	0.766782	0.0272747	0.388568
CHMP2A.17728.61	CHMP2A	27243	O43633	0.684302	0.0272993	0.388568
CRLF2.13694.24	CRLF2	64109	Q9HC73	0.557684	0.0275899	0.391589
MUSK.11547.84	MUSK		O15146	-0.735827	0.0276823	0.391787
CA8.11390.24	CA8	767	P35219	-0.201752	0.0278586	0.393169
DGCR6.9444.70	DGCR6	8214	Q14129	-0.196984	0.0280811	0.393775
CFL2.15339.32	CFL2	1073	Q9Y281	0.94496	0.0281696	0.393775
SHC2.14074.2	SHC2		P98077	-0.413896	0.0282386	0.393775
CTSK.9443.137	CTSK	1513	P43235	-0.469214	0.028392	0.393775
RGS21.19381.7	RGS21	431704	Q2M5E4	1.13415	0.0284113	0.393775
SUMF2.6069.71	SUMF2	25870	Q8NBJ7	0.484121	0.0285572	0.393775
AMY2A.18917.53	AMY2A	279	P04746	-0.677867	0.028713	0.393775
IDS.3198.4	IDS	3423	P22304	-0.526658	0.028803	0.393775
SCARF2.9925.56	SCARF2	91179	Q96GP6	0.404729	0.0288287	0.393775
TAF15.16865.62	TAF15	8148	Q92804	0.575046	0.0288777	0.393775
COL4A3BP.13535.2	COL4A3BP	10087	Q9Y5P4	0.395792	0.0289263	0.393775
GIMAP6.19302.7	GIMAP6	474344	Q6P9H5	0.247753	0.0289994	0.393775
EPHA2.4834.61	EPHA2	1969	P29317	0.650565	0.0290176	0.393775
USP28.19562.8	USP28	57646	Q96RU2	-0.186371	0.0291216	0.393775
ENPEP.15558.63	ENPEP	2028	Q07075	-0.428185	0.0291314	0.393775
DNAJB6.11606.22	DNAJB6		O75190	0.25767	0.029362	0.393775
FAH.11424.4	FAH	2184	P16930	-0.542225	0.0294208	0.393775
SOD1.2794.60	SOD1	6647	P00441	0.524069	0.0294684	0.393775
RS1.6497.10	RS1	6247	O15537	-0.238588	0.029474	0.393775
KCNE3.8067.21	KCNE3	10008	Q9Y6H6	-0.461737	0.0295977	0.393775
UCN3.10756.34	UCN3	114131	Q969E3	0.753199	0.0297805	0.393775
IL17RB.6262.14	IL17RB	55540	Q9NRM6	0.460437	0.0298225	0.393775
RGMB.3331.8	RGMB	285704	Q6NW40	0.389276	0.029831	0.393775
KPNA4.12698.72	KPNA4	3840	O00629	0.320591	0.0298533	0.393775
CAMK2D.3419.49	CAMK2D	817	Q13557	0.440086	0.0298993	0.393775
PGLS.17799.9	PGLS	25796	O95336	0.518696	0.0299509	0.393775
NUP98.12772.8	NUP98		P52948	0.274959	0.030145	0.394701
YBX2.6372.7	YBX2	51087	Q9Y2T7	0.52681	0.0301793	0.394701
CKB.3800.71	CKB	1152	P12277	0.305935	0.0303154	0.394949
SERPINB5.15417.3	SERPINB5	5268	P36952	0.363243	0.0303564	0.394949
LRP2.10618.190	LRP2	4036	P98164	0.654836	0.030801	0.396906
KRTDAP.5739.75	KRTDAP	388533	P60985	-0.260681	0.0308919	0.396906
LRP1B.11275.94	LRP1B	53353	Q9NZR2	0.428726	0.0308955	0.396906
KREMEN2.3202.28	KREMEN2	79412	Q8NCW0	0.392603	0.0309001	0.396906
MTHFS.14107.1	MTHFS		P49914	0.679699	0.030904	0.396906
MYOM2.13534.20	MYOM2	9172	P54296	0.839322	0.0310451	0.397271
C19orf18.9445.44	C19orf18	147685	Q8NEA5	-0.15893	0.0310914	0.397271
EFNA4.2614.28	EFNA4	1945	P52798	0.541842	0.0313501	0.399554
ZWILCH.18302.204	ZWILCH	55055	Q9H900	-0.280145	0.0315171	0.400248
AXIN2.12925.105	AXIN2	8313	Q9Y2T1	-0.419432	0.0315648	0.400248
FAM163B.10880.38	FAM163B	642968	P0C2L3	0.226849	0.0318722	0.403123
UBB.6651.74	UBB	7314	P0CG47	0.349823	0.0322776	0.406373
TGM3.4471.50	TGM3	7053	Q08188	0.679095	0.0323598	0.406373
IL21R.9366.54	IL21R	50615	Q9HBE5	0.419635	0.0323732	0.406373
STAT6.10372.18	STAT6	6778	P42226	0.57836	0.0326719	0.409095
LAYN.2635.61	LAYN	143903	Q6UX15	0.338555	0.0328795	0.40952
DKK3.3607.71	DKK3	27122	Q9UBP4	0.507434	0.0330254	0.40952
IGFBP6.14088.38	IGFBP6	3489	P24592	0.305555	0.0331698	0.40952
C11orf87.11116.16	C11orf87		Q6NUJ2	0.372307	0.0331889	0.40952
CDC37.3879.50	CDC37	11140	Q16543	0.41813	0.0332379	0.40952
SLITRK1.15539.15	SLITRK1	114798	Q96PX8	0.53016	0.0332795	0.40952
RRBP1.9913.4	RRBP1	6238	Q9P2E9	0.482567	0.0333641	0.40952
EPHA3.3432.21	EPHA3	2042	P29320	-0.174591	0.033393	0.40952
NELL2.6022.57	NELL2	4753	Q99435	0.332031	0.0334436	0.40952
CHGB.8235.48	CHGB	1114	P05060	0.700664	0.0335568	0.409902
MYL12A.19373.3	MYL12A	10627	P19105	0.684563	0.0338335	0.411591
OSBPL11.12878.60	OSBPL11		Q9BXB4	0.406089	0.0339323	0.411591
ARSA.3583.54	ARSA	410	P15289	-0.415061	0.0339423	0.411591
RNASE4.5644.60	RNASE4	6038	P34096	0.397944	0.0341156	0.411774
CD3E.18870.1	CD3E	916	P07766	-0.187036	0.0341232	0.411774
RPS7.3864.5	RPS7	6201	P62081	0.478996	0.0342519	0.411774
ERLEC1.8957.72	ERLEC1	27248	Q96DZ1	0.497692	0.0342871	0.411774
AGO1.15312.14	AGO1	26523	Q9UL18	0.620272	0.0344043	0.411943
NID1.3213.65	NID1	4811	P14543	0.469321	0.034466	0.411943
FAM49B.19176.27	FAM49B	51571	Q9NUQ9	0.652691	0.0345735	0.412242
ERBB3.2617.56	ERBB3	2065	P21860	-0.372756	0.034875	0.414234
CST2.4324.33	CST2	1470	P09228	0.876771	0.034959	0.414234
OMG.16908.5	OMG	4974	P23515	-0.558559	0.0351066	0.414234
CD200R1.5103.30	CD200R1	131450	Q8TD46	-0.149268	0.0351161	0.414234
ALPP.7813.6	ALPP	250	P05187	-0.187451	0.0351552	0.414234
PTPN11.3397.7	PTPN11	5781	Q06124	0.473266	0.0353124	0.414854
FCGR1A.3312.64	FCGR1A	2209	P12314	0.461384	0.0353738	0.414854
PSG9.9335.28	PSG9	5678	Q00887	0.505339	0.0355705	0.415256
FURIN.6276.16	FURIN	5045	P09958	0.590176	0.0355744	0.415256
PEBP1.4276.10	PEBP1	5037	P30086	0.530738	0.0359276	0.416233
PEA15.18833.76	PEA15	8682	Q15121	0.435351	0.0360565	0.416233
S100A12.5852.6	S100A12	6283	P80511	0.739519	0.0360952	0.416233
UBE2S.17729.20	UBE2S	27338	Q16763	0.48788	0.0361895	0.416233
TNFRSF19.5131.15	TNFRSF19	55504	Q9NS68	0.503696	0.0364124	0.416233
PRRG1.9008.6	PRRG1	5638	O14668	0.215579	0.0364149	0.416233
NUCB1.10451.11	NUCB1	4924	Q02818	0.645422	0.0364381	0.416233
MATN2.3325.2	MATN2	4147	O00339	0.363652	0.0365446	0.416233
MAP4K1.8954.30	MAP4K1	11184	Q92918	0.620469	0.0365927	0.416233
CD55.5069.9	CD55	1604	P08174	0.381359	0.0366138	0.416233
HSPA8.5903.91	HSPA8	3312	P11142	0.438445	0.0366583	0.416233
B4GALT1.13381.49	B4GALT1	2683	P15291	0.388522	0.0367171	0.416233
CPLX2.15321.8	CPLX2		Q6PUV4	0.618902	0.036821	0.416233
FAM3D.13102.1	FAM3D	131177	Q96BQ1	0.651931	0.0368394	0.416233
PTPRJ.8250.2	PTPRJ	5795	Q12913	-0.239486	0.0369078	0.416233
BTN3A3.17692.2	BTN3A3	10384	O00478	0.569592	0.0370327	0.416702
ADAMTS13.3175.51	ADAMTS13	11093	Q76LX8	-0.410266	0.037145	0.417026
ASAH2.3212.30	ASAH2	56624	Q9NR71	-0.346285	0.0376037	0.421229
LGMN.3622.33	LGMN	5641	Q99538	-0.447331	0.0377874	0.422339
LRP11.15472.16	LRP11	84918	Q86VZ4	0.395957	0.0381173	0.425076
OSTF1.19118.47	OSTF1	26578	Q92882	0.308687	0.0382383	0.425475
SEZ6L2.3867.49	SEZ6L2	26470	Q6UXD5	0.335342	0.0386873	0.426042
C4A.C4B.18821.9	C4A C4B	720 721	P0C0L4 P0C0L5	0.602498	0.0388521	0.426042
SEMA3E.5363.51	SEMA3E	9723	O15041	0.345851	0.0389571	0.426042
TPSB2.3403.1	TPSB2	64499	P20231	0.774117	0.0390058	0.426042
PLBD1.6315.58	PLBD1	79887	Q6P4A8	0.500021	0.0390231	0.426042
SFRP1.3221.54	SFRP1	6422	Q8N474	1.44299	0.0391309	0.426042
CPT1B.11709.29	CPT1B	1375	Q92523	-0.203217	0.0391755	0.426042
HNRNPA2B1.5351.52	HNRNPA2B1	3181	P22626	0.930275	0.0392697	0.426042
LGALS9.9197.4	LGALS9	3965	O00182	0.352463	0.03928	0.426042
FGFBP1.15494.11	FGFBP1	9982	Q14512	1.60991	0.0393046	0.426042
CD40LG.3534.14	CD40LG	959	P29965	0.236878	0.0394157	0.426042
TXNDC5.11212.7	TXNDC5	81567	Q8NBS9	0.461808	0.0394498	0.426042
SMNDC1.17805.35	SMNDC1	10285	O75940	0.855145	0.0397335	0.426042
SECTM1.13093.6	SECTM1	6398	Q8WVN6	0.456089	0.0398489	0.426042
STX8.10903.50	STX8	9482	Q9UNK0	0.532022	0.0399637	0.426042
AMY2B.15556.49	AMY2B	280	P19961	-0.592792	0.0400309	0.426042
METTL24.9470.15	METTL24	728464	Q5JXM2	-0.305693	0.0400719	0.426042
KIR3DL1.18907.97	KIR3DL1	3811	P43629	0.28322	0.0401557	0.426042
NPPA.5443.62	NPPA	4878	P01160	0.363643	0.0402889	0.426042
CD68.18922.27	CD68	968	P34810	0.450798	0.0403245	0.426042
NUDC.8887.21	NUDC	10726	Q9Y266	0.421195	0.0403594	0.426042
CHIT1.3600.2	CHIT1	1118	Q13231	0.579692	0.0403911	0.426042
MMP13.4925.54	MMP13	4322	P45452	0.342806	0.0404457	0.426042
ARL15.18411.83	ARL15	54622	Q9NXU5	-0.493594	0.0405389	0.426042
CSF2RB.11137.43	CSF2RB	1439	P32927	-0.151134	0.0406844	0.426042
IL1RN.5353.89	IL1RN	3557	P18510	0.57356	0.0407675	0.426042
EVA1B.8062.15	EVA1B	55194	Q9NVM1	-0.574416	0.0408019	0.426042
CLEC7A.3603.60	CLEC7A	64581	Q9BXN2	0.432759	0.0408142	0.426042
LRIG3.3322.52	LRIG3	121227	Q6UXM1	-0.440043	0.040828	0.426042
SNRPD2.17823.40	SNRPD2	6633	P62316	0.463122	0.0409	0.426042
PTX3.6447.73	PTX3	5806	P26022	0.253836	0.0409328	0.426042
PARK7.19523.215	PARK7	11315	Q99497	0.529435	0.0410326	0.426124
SPP1.13113.7	SPP1	6696	P10451	0.699261	0.0411599	0.426124
EPHB1.17680.12	EPHB1	2047	P54762	0.451362	0.0413311	0.426124
CLTA.19257.11	CLTA	1211	P09496	0.49103	0.0413569	0.426124
BAD.5870.23	BAD	572	Q92934	0.432179	0.0413872	0.426124
SEMA4F.9932.49	SEMA4F	10505	O95754	-0.261236	0.041465	0.426124
MAPK8.3825.18	MAPK8	5599	P45983	0.45272	0.0415377	0.426124
EXOSC1.7930.3	EXOSC1	51013	Q9Y3B2	0.246424	0.0418007	0.427943
SMURF1.11557.3	SMURF1	57154	Q9HCE7	0.299231	0.0420826	0.429568
STAU1.12471.47	STAU1	6780	O95793	0.35082	0.0423284	0.429568
TREML2.5736.1	TREML2	79865	Q5T2D2	0.342351	0.0424559	0.429568
PITPNA.9934.29	PITPNA	5306	Q00169	0.220904	0.0424867	0.429568
ITSN1.14070.56	ITSN1		Q15811	0.213797	0.04251	0.429568
AZGP1.9312.8	AZGP1	563	P25311	0.279992	0.0425174	0.429568
SLITRK3.10565.19	SLITRK3	22865	O94933	0.687676	0.0426054	0.429568
UBQLN4.12720.71	UBQLN4		Q9NRR5	0.445442	0.0426473	0.429568
APLP1.7210.25	APLP1	333	P51693	-0.492336	0.0427388	0.429624
PRKCZ.2645.54	PRKCZ	5590	Q05513	0.500216	0.0429369	0.430749
YWHAE.14157.21	YWHAE	7531	P62258	-0.401995	0.0433007	0.432781
ENPP2.16892.23	ENPP2	5168	Q13822	-0.599161	0.0433526	0.432781
FSTL1.13112.179	FSTL1	11167	Q12841	0.305153	0.0433993	0.432781
SAP18.12830.4	SAP18		O00422	0.30319	0.0436988	0.434648
ERAP1.4964.67	ERAP1	51752	Q9NZ08	-0.539504	0.0437606	0.434648
MATN3.19361.78	MATN3	4148	O15232	0.540909	0.043862	0.434791
UBE2B.9865.40	UBE2B	7320	P63146	-0.256166	0.0440556	0.435845
BRICD5.6612.90	BRICD5	283870	Q6PL45	0.327837	0.0441929	0.436277
CGREF1.6257.56	CGREF1	10669	Q99674	0.371048	0.0443499	0.436277
SDF2L1.6990.44	SDF2L1	23753	Q9HCN8	0.371911	0.0443612	0.436277
DCLK1.17156.72	DCLK1	9201	O15075	0.498549	0.0446339	0.437604
COX6C.8903.1	COX6C	1345	P09669	0.319782	0.0446713	0.437604
NBL1.2944.66	NBL1	4681	P41271	0.687856	0.0448962	0.438678
PDXP.3897.61	PDXP	57026	Q96GD0	0.452537	0.0449565	0.438678
PUF60.10575.31	PUF60	22827	Q9UHX1	0.456503	0.0454317	0.439609
TMEM108.10583.1	TMEM108	66000	Q6UXF1	-0.343427	0.0454468	0.439609
ADAM23.7049.2	ADAM23	8745	O75077	-0.458134	0.0455198	0.439609
CLEC3B.5701.81	CLEC3B	7123	P05452	-0.250997	0.0456186	0.439609
SERPINA9.7266.4	SERPINA9	327657	Q86WD7	-0.290797	0.0456746	0.439609
ACVRL1.16318.12	ACVRL1	94	P37023	0.405705	0.0458962	0.439609
SMOC1.13118.5	SMOC1	64093	Q9H4F8	0.844079	0.0461937	0.439609
POLE3.19170.25	POLE3	54107	Q9NRF9	0.232017	0.0463176	0.439609
SCN2B.8353.15	SCN2B	6327	O60939	-0.472924	0.0463203	0.439609
ST6GAL1.6035.2	ST6GAL1	6480	P15907	0.240898	0.0463503	0.439609
PSMA6.3860.7	PSMA6	5687	P60900	0.286124	0.0463684	0.439609
FAM151A.7856.51	FAM151A	338094	Q8WW52	-0.628605	0.046375	0.439609
NCF1.17766.5	NCF1	653361	P14598	0.99956	0.0463829	0.439609
NAGPA.11208.15	NAGPA		Q9UK23	-0.320943	0.0464139	0.439609
FHIT.9826.135	FHIT	2272	P49789	0.462724	0.0464233	0.439609
AREG.2970.60	AREG	374	P15514	0.339654	0.0464599	0.439609
RBM39.4284.18	RBM39	9584	Q14498	0.405576	0.0466716	0.440336
PSG1.15631.18	PSG1	5669	P11464	-0.171843	0.0468578	0.440336
FGF3.7894.155	FGF3	2248	P11487	0.208838	0.0469713	0.440336
DUT.9995.6	DUT	1854	P33316	0.637967	0.0472714	0.440336
DDR2.15381.45	DDR2	4921	Q16832	0.42703	0.047306	0.440336
ARL3.12571.14	ARL3	403	P36405	0.39501	0.0474281	0.440336
TNR.11302.237	TNR	7143	Q92752	-0.309452	0.0474421	0.440336
RARRES2.3079.62	RARRES2	5919	Q99969	0.498885	0.047448	0.440336
SMPD1.10818.36	SMPD1	6609	P17405	-0.464639	0.0475646	0.440336
NQO1.9837.60	NQO1	1728	P15559	0.965914	0.0476632	0.440336
IMPA2.12581.39	IMPA2	3613	O14732	-0.312237	0.0477098	0.440336
NET1.14260.112	NET1	10276	Q7Z628	0.24045	0.0477225	0.440336
ROR2.7861.9	ROR2	4920	Q01974	0.617651	0.0478568	0.440336
DEFB1.6629.3	DEFB1	1672	P60022	-0.393607	0.0478572	0.440336
HSPA1A.10749.18	HSPA1A	3303	P0DMV8	0.488701	0.0478607	0.440336
CNTF.3489.9	CNTF	1270	P26441	-0.121695	0.0479469	0.440336
SVIP.18285.6	SVIP	258010	Q8NHG7	-0.448129	0.0480931	0.440869
BPIFA2.16302.11	BPIFA2	140683	Q96DR5	-0.271492	0.0483284	0.442214
UNC5B.15394.79	UNC5B	219699	Q8IZJ1	0.492296	0.048418	0.442223
EDA.14024.196	EDA	1896	Q92838	-0.233623	0.0486664	0.443682
GNPDA1.8909.77	GNPDA1	10007	P46926	0.418291	0.04876	0.443725
RANBP1.18191.23	RANBP1	5902	P43487	0.328704	0.0492503	0.447305
EGFR.2677.1	EGFR	1956	P00533	-0.24709	0.0494216	0.447305
POLR2J.19199.3	POLR2J	5439	P52435	0.137521	0.0495076	0.447305
ST8SIA4.7038.45	ST8SIA4	7903	Q92187	0.705785	0.0497565	0.447305
SPINT1.2828.82	SPINT1	6692	O43278	-0.411653	0.0497673	0.447305
TRDMT1.12635.9	TRDMT1		O14717	-0.165389	0.0498052	0.447305
CARS.14098.28	CARS		P49589	0.350188	0.0498608	0.447305
KIAA0040.14603.51	KIAA0040		J3QR46	0.34071	0.0499266	0.447305
AIF1.2849.49	AIF1	199	P55008	0.443334	0.0500376	0.447305
ANG.4874.3	ANG	283	P03950	0.550121	0.0500487	0.447305
SH3BP2.7769.29	SH3BP2	6452	P78314	0.382613	0.050396	0.449605
PIM1.5359.65	PIM1	5292	P11309	0.518823	0.0509499	0.453736
EIF4A2.18824.7	EIF4A2	1974	Q14240	0.519002	0.0511359	0.454332
FKBP3.18383.9	FKBP3	2287	Q00688	0.526433	0.0511987	0.454332
MXRA8.10521.10	MXRA8	54587	Q9BRK3	0.643325	0.0514232	0.455515
BRPF1.11671.19	BRPF1		P55201	0.207047	0.0517225	0.457155
COL20A1.8804.39	COL20A1	57642	Q9P218	-0.177053	0.0517913	0.457155
PVR.8064.125	PVR	5817	P15151	0.278845	0.0520522	0.457816
ZNF18.11372.2	ZNF18		P17022	0.215742	0.0521282	0.457816
LGALS8.4909.68	LGALS8	3964	O00214	-0.136054	0.0521411	0.457816
XRCC1.12535.2	XRCC1	7515	P18887	-0.304147	0.0523904	0.45787
TMEM59L.9959.60	TMEM59L	25789	Q9UK28	0.271706	0.0524322	0.45787
GMFB.17784.23	GMFB	2764	P60983	0.568937	0.0524958	0.45787
KIAA1467.9981.18	KIAA1467	57613	A2RU67	-0.413256	0.0525139	0.45787
ERVV1.12531.5	ERVV-1		B6SEH8	-0.50925	0.0526099	0.457908
IL2RG.2634.2	IL2RG	3561	P31785	0.349374	0.0527809	0.458375
TPT1.3872.2	TPT1	7178	P13693	0.609973	0.0528471	0.458375
CASP2.4904.7	CASP2	835	P42575	-0.198356	0.052985	0.458775
TNFRSF13B.2704.74	TNFRSF13B	23495	O14836	0.32702	0.0532849	0.460573
LTF.2780.35	LTF	4057	P02788	0.685722	0.0534466	0.461173
HPGDS.12549.33	HPGDS	27306	O60760	-0.344165	0.0536305	0.461962
DEFB112.5689.1	DEFB112	245915	Q30KQ8	-1.19782	0.0541593	0.462096
CXCL11.3038.9	CXCL11	6373	O14625	0.802802	0.0541845	0.462096
AXIN2.8429.16	AXIN2	8313	Q9Y2T1	-0.332766	0.054244	0.462096
ATXN3.16825.20	ATXN3	4287	P54252	0.517445	0.0543053	0.462096
PARP1.8893.29	PARP1	142	P09874	0.410846	0.0543844	0.462096
PROK2.10754.113	PROK2	60675	Q9HC23	0.794086	0.0545414	0.462096
EIF1AY.19224.5	EIF1AY	9086	O14602	0.42925	0.0546022	0.462096
CHRDL2.6086.15	CHRDL2	25884	Q6WN34	0.45695	0.0546807	0.462096
APLP2.10627.87	APLP2	334	Q06481	0.423185	0.0547461	0.462096
C5orf38.6378.2	C5orf38	153571	Q86SI9	-0.352199	0.0547646	0.462096
SEMG1.7115.5	SEMG1	6406	P04279	-0.291896	0.0547788	0.462096
MAP3K7.TAB1.5259.2	MAP3K7 TAB1	6885 10454	O43318 Q15750	0.210789	0.0549233	0.462096
IGFBP4.2950.57	IGFBP4	3487	P22692	0.366497	0.0550464	0.462096
CXCL13.3487.32	CXCL13	10563	O43927	0.932389	0.0550559	0.462096
IHH.19606.28	IHH	3549	Q14623	-0.281874	0.0550564	0.462096
ACHE.15553.22	ACHE	43	P22303	-0.366088	0.0551259	0.462096
SERF2.18274.2	SERF2	10169	P84101	0.286558	0.0552734	0.462556
DLL1.5349.69	DLL1	28514	O00548	0.408297	0.0555986	0.464056
HS3ST4.19370.30	HS3ST4	9951	Q9Y661	0.20003	0.0557277	0.464056
SHH.2743.5	SHH	6469	Q15465	-0.441794	0.0558045	0.464056
PAPPA.4148.49	PAPPA	5069	Q13219	0.573428	0.0558242	0.464056
HSPA1A.7219.152	HSPA1A	3303	P0DMV8	0.48665	0.055919	0.464072
RBP5.19241.31	RBP5	83758	P82980	0.609322	0.0561957	0.465595
ITPA.18916.25	ITPA	3704	Q9BY32	0.480095	0.0565088	0.467414
HK2.13130.150	HK2	3099	P52789	0.608588	0.057009	0.470772
DAPK1.13955.33	DAPK1	1612	P53355	0.43359	0.0571452	0.471118
SHC1.16043.30	SHC1	6464	P29353	0.428268	0.0572871	0.471333
KRTAP24.14615.46	KRTAP2-4		Q9BYR9	0.344449	0.05736	0.471333
STAMBPL1.12401.3	STAMBPL1		Q96FJ0	-0.166221	0.057749	0.473384
FIS1.17746.77	FIS1	51024	Q9Y3D6	0.261941	0.057842	0.473384
TXNDC12.19334.62	TXNDC12	51060	O95881	0.541353	0.0578938	0.473384
LRRN1.11293.14	LRRN1	57633	Q6UXK5	-0.232572	0.0585298	0.477737
PTCHD3.13517.3	PTCHD3		Q3KNS1	-0.502559	0.0586174	0.477737
AP1G2.12714.38	AP1G2	8906	O75843	0.622309	0.0588546	0.477958
MGAT4B.7141.21	MGAT4B	11282	Q9UQ53	-0.442746	0.058879	0.477958
TSN.12477.42	TSN		Q15631	0.329107	0.0589316	0.477958
MEMO1.19110.6	MEMO1	51072	Q9Y316	0.264004	0.0592614	0.479854
RBM23.11590.5	RBM23		Q86U06	0.45715	0.0594052	0.48024
GUCA1A.10008.43	GUCA1A	2978	P43080	-0.197776	0.0595472	0.480347
ENGASE.16781.2	ENGASE	64772	Q8NFI3	-0.410708	0.0596107	0.480347
REN.3396.54	REN	5972	P00797	0.75631	0.0598815	0.481752
F3.4931.59	F3	2152	P13726	0.466877	0.0603572	0.484799
NMNAT1.18932.84	NMNAT1		Q9HAN9	0.289522	0.0606502	0.485983
COL9A1.15466.30	COL9A1	1297	P20849	0.222062	0.0607205	0.485983
ARHGAP25.11333.82	ARHGAP25	9938	P42331	0.616968	0.0609567	0.485983
BMP1.3348.49	BMP1	649	P13497	-0.539873	0.0610355	0.485983
GCA.12594.5	GCA		P28676	0.622929	0.0610513	0.485983
CTSG.2431.17	CTSG	1511	P08311	0.430907	0.0610884	0.485983
PLA2G7.5015.15	PLA2G7	7941	Q13093	-0.546391	0.0612335	0.486306
FCGR3A.15388.24	FCGR3A	2214	P08637	2.12376	0.0614897	0.486306
TYRO3.2611.72	TYRO3	7301	Q06418	-0.241542	0.061544	0.486306
MCL1.9819.110	MCL1	4170	Q07820	0.303743	0.0615724	0.486306
HDLBP.13570.43	HDLBP	3069	Q00341	0.224849	0.0616156	0.486306
CYR61.6264.9	CYR61	3491	O00622	0.358189	0.0618488	0.487377
RPS19.19166.15	RPS19	6223	P39019	0.587151	0.0620106	0.487725
SERPINA5.3389.7	SERPINA5	5104	P05154	-0.649159	0.0621036	0.487725
ASH2L.12832.10	ASH2L	9070	Q9UBL3	0.235964	0.0621984	0.487725
MYSM1.11536.9	MYSM1		Q5VVJ2	-0.221581	0.0623904	0.487725
COG8.9543.131	COG8	84342	Q96MW5	-0.41696	0.0624696	0.487725
SYNE2.9789.52	SYNE2	23224	Q8WXH0	0.443381	0.0624788	0.487725
THBS2.14111.15	THBS2	7058	P35442	0.355811	0.0626603	0.48781
UFC1.3405.6	UFC1	51506	Q9Y3C8	0.342925	0.062685	0.48781
VPS26A.19293.6	VPS26A	9559	O75436	0.504803	0.062871	0.488093
PURA.12537.88	PURA	5813	Q00577	0.295607	0.0630067	0.488093
IRF3.17151.84	IRF3	3661	Q14653	0.482586	0.0630289	0.488093
NISCH.12738.43	NISCH		Q9Y2I1	0.211227	0.0631121	0.488093
HIBADH.4693.72	HIBADH	11112	P31937	-0.168431	0.0636839	0.491601
RPA2.19264.6	RPA2	6118	P15927	0.41824	0.0637624	0.491601
LIPN.8097.77	LIPN	643418	Q5VXI9	-0.357534	0.0639373	0.492189
RSPO2.8409.3	RSPO2	340419	Q6UXX9	0.262651	0.0640486	0.492288
FCRL1.5728.60	FCRL1	115350	Q96LA6	-0.52636	0.0642784	0.493264
SPG21.11122.97	SPG21		Q9NZD8	0.513874	0.0643731	0.493264
CYB5R2.19143.38	CYB5R2	51700	Q6BCY4	0.417168	0.0647926	0.495718
S100A8.S100A9.17145.1	S100A8 S100A9	6279 6280	P05109, P06702	0.915045	0.0651653	0.497642
MEOX2.18259.15	MEOX2	4223	P50222	0.266838	0.0652799	0.497642
RBBP5.13631.1	RBBP5	5929	Q15291	0.200799	0.0653477	0.497642
CXCL17.9495.10	CXCL17	284340	Q6UXB2	-0.165191	0.0654425	0.497642
ALDH5A1.17792.158	ALDH5A1	7915	P51649	-0.484236	0.0658031	0.499624
H1FX.12709.63	H1FX	8971	Q92522	0.941948	0.0662949	0.501105
NTF4.4146.58	NTF4	4909	P34130	0.222721	0.0663741	0.501105
HOMER1.19229.92	HOMER1	9456	Q86YM7	0.628974	0.066465	0.501105
DNAJC18.8033.1	DNAJC18	202052	Q9H819	-0.29148	0.0665081	0.501105
LECT2.16763.11	LECT2	3950	O14960	-0.774892	0.06667	0.501105
CACNA2D3.8885.6	CACNA2D3	55799	Q8IZS8	-0.252956	0.0667714	0.501105
GFRA3.2505.49	GFRA3	2676	O60609	0.388235	0.0667845	0.501105
CHI3L1.11104.13	CHI3L1	1116	P36222	0.918913	0.0669043	0.501105
NOP16.18228.30	NOP16	51491	Q9Y3C1	0.287658	0.0669223	0.501105
UBE2I.2877.3	UBE2I	7329	P63279	0.380406	0.0670237	0.501105
RBBP4.15331.47	RBBP4	5928	Q09028	0.69856	0.0671015	0.501105
MAPK1.3115.64	MAPK1	5594	P28482	0.435896	0.0676029	0.503113
MEPE.3209.69	MEPE	56955	Q9NQ76	0.193688	0.0676673	0.503113
MCEMP1.6283.60	MCEMP1	199675	Q8IX19	0.21553	0.0677596	0.503113
EFNB3.2514.65	EFNB3	1949	Q15768	0.443848	0.0677732	0.503113
GGH.9370.69	GGH	8836	Q92820	-0.394772	0.068073	0.503225
CD69.16618.7	CD69	969	Q07108	-0.793505	0.0680901	0.503225
TNFSF10.8833.20	TNFSF10	8743	P50591	0.294586	0.0681346	0.503225
ETS2.12350.86	ETS2		P15036	-0.304346	0.0681913	0.503225
TMEM132C.11128.29	TMEM132C	92293	Q8N3T6	0.284986	0.0684761	0.503589
MXRA7.8005.1	MXRA7	439921	P84157	0.399921	0.0685133	0.503589
KIF23.5228.25	KIF23	9493	Q02241	0.31223	0.0686972	0.503589
GREM2.5598.3	GREM2	64388	Q9H772	0.460092	0.0687969	0.503589
LCMT1.4237.70	LCMT1	51451	Q9UIC8	0.159404	0.0688699	0.503589
KCNMB3.8905.20	KCNMB3	27094	Q9NPA1	-0.285484	0.0689257	0.503589
KLK15.6491.59	KLK15	55554	Q9H2R5	0.187689	0.0689461	0.503589
TARBP2.12781.2	TARBP2	6895	Q15633	0.209533	0.0694357	0.505065
CRIM1.8699.43	CRIM1	51232	Q9NZV1	0.54542	0.0694725	0.505065
NT5E.15452.5	NT5E	4907	P21589	-0.519457	0.06952	0.505065
NHP2L1.13602.6	NHP2L1	4809	P55769	0.416359	0.0695525	0.505065
ASAP2.13518.5	ASAP2	8853	O43150	-0.507892	0.0699217	0.506578
HSPA1A.6563.78	HSPA1A	3303	P0DMV8	0.553978	0.0700855	0.506578
EGLN1.9901.28	EGLN1	54583	Q9GZT9	0.408667	0.0701346	0.506578
PLD5.8081.55	PLD5	200150	Q8N7P1	-0.159336	0.0702466	0.506578
ANXA4.17164.15	ANXA4	307	P09525	0.540917	0.0702797	0.506578
POLE2.11562.9	POLE2	5427	P56282	0.273616	0.0704757	0.506578
DNASE1L2.6324.11	DNASE1L2	1775	Q92874	0.560921	0.0706733	0.506578
TGFBR3.3009.3	TGFBR3	7049	Q03167	0.333962	0.0706927	0.506578
RNF128.8633.18	RNF128	79589	Q8TEB7	-0.106045	0.0707015	0.506578
NRXN2.8876.51	NRXN2	9379	P58401	-0.223325	0.0709419	0.506578
AASDHPPT.17320.19	AASDHPPT	60496	Q9NRN7	0.383553	0.0710375	0.506578
ARHGAP36.6289.78	ARHGAP36	158763	Q6ZRI8	0.415791	0.0710778	0.506578
CABP7.7104.71	CABP7	164633	Q86V35	-0.353575	0.0712579	0.506578
TLL1.6383.90	TLL1	7092	O43897	-0.416211	0.0714807	0.506578
KCNIP3.10513.13	KCNIP3	30818	Q9Y2W7	-0.697156	0.0715993	0.506578
EIF4A1.18829.4	EIF4A1	1973	P60842	0.564251	0.071633	0.506578
CRTAC1.5632.6	CRTAC1	55118	Q9NQ79	0.365498	0.0716561	0.506578
MMP12.4496.60	MMP12	4321	P39900	0.633545	0.0716772	0.506578
UFD1L.17411.55	UFD1L	7353	Q92890	0.560924	0.0717109	0.506578
MST1.4407.10	MST1	4485	P26927	-0.832198	0.0719052	0.506578
AHSA1.11633.89	AHSA1	10598	O95433	0.280839	0.0725193	0.506578
EGFR.19567.1	EGFR		P00533	-0.38176	0.0725356	0.506578
TNFRSF6B.5070.76	TNFRSF6B	8771	O95407	0.214992	0.0725745	0.506578
LOXL2.6504.65	LOXL2	4017	Q9Y4K0	0.142384	0.072593	0.506578
PSMD11.13572.43	PSMD11	5717	O00231	0.395644	0.072631	0.506578
MASP1.3605.77	MASP1	5648	P48740	-0.17866	0.0728206	0.506578
PIN1.15474.7	PIN1	5300	Q13526	0.430084	0.0728297	0.506578
KIAA1161.8068.43	KIAA1161	57462	Q6NSJ0	-0.20393	0.0728567	0.506578
RCVRN.14334.3	RCVRN	5957	P35243	-0.256501	0.07287	0.506578
LRIT3.11534.6	LRIT3		Q3SXY7	0.314873	0.0728841	0.506578
CCL2.2578.67	CCL2	6347	P13500	0.628104	0.0729042	0.506578
WFDC1.9316.67	WFDC1	58189	Q9HC57	0.580086	0.0733941	0.508841
ASIC4.6951.26	ASIC4	55515	Q96FT7	0.180453	0.0734336	0.508841
TIGIT.16299.13	TIGIT		Q495A1	-0.259984	0.0736751	0.509756
FAM162A.6531.29	FAM162A	26355	Q96A26	0.234467	0.0737697	0.509756
DEFB103A.5679.16	DEFB103A	414325	P81534	0.160294	0.074074	0.510367
C1QTNF1.6304.8	C1QTNF1	114897	Q9BXJ1	0.298743	0.0741373	0.510367
INA.11436.6	INA	9118	Q16352	0.369955	0.0741646	0.510367
SUB1.19236.24	SUB1	10923	P53999	0.753329	0.074463	0.511147
MAGI2.14066.49	MAGI2		Q86UL8	0.283607	0.0744826	0.511147
HMGB3.12775.6	HMGB3	3149	O15347	0.478008	0.0746181	0.511338
PTGDS.10514.5	PTGDS	5730	P41222	0.466422	0.0747186	0.511338
HDAC8.2859.69	HDAC8	55869	Q9BY41	0.457057	0.0748175	0.511338
SLC6A14.13053.6	SLC6A14	11254	Q9UN76	-0.300714	0.0750014	0.511895
S100A5.15303.63	S100A5	6276	P33763	0.371928	0.0751103	0.511939
CAND1.13937.75	CAND1	55832	Q86VP6	0.39101	0.0753332	0.512758
DCN.2666.53	DCN	1634	P07585	0.315455	0.0755471	0.513515
C8A.C8B.C8G.2429.27	C8A C8B C8G	731 732 733	P07357,P07358,P07360	-0.424835	0.0758986	0.513768
DRGX.8034.6	DRGX	644168	A6NNA5	-0.174089	0.0760244	0.513768
CKAP2.5345.51	CKAP2	26586	Q8WWK9	-0.22239	0.0762022	0.513768
TGFBI.3283.21	TGFBI	7045	Q15582	-0.248518	0.0762884	0.513768
MAGEA10.13610.9	MAGEA10	4109	P43363	-0.384866	0.0763142	0.513768
TNFRSF9.14025.18	TNFRSF9	3604	Q07011	0.153299	0.0763436	0.513768
SCARF1.5129.12	SCARF1	8578	Q14162	0.370842	0.0763576	0.513768
ADAM30.8520.8	ADAM30	11085	Q9UKF2	-0.229217	0.0764071	0.513768
BAMBI.8811.24	BAMBI	25805	Q13145	0.338192	0.0767301	0.51516
LZIC.19338.3	LZIC	84328	Q8WZA0	0.249418	0.0770244	0.51516
WBP1L.9532.5	WBP1L	54838	Q9NX94	-0.255534	0.077025	0.51516
UPP1.19448.104	UPP1	7378	Q16831	0.40843	0.0772321	0.51516
FLII.12677.164	FLII	2314	Q13045	0.333534	0.077374	0.51516
TMEM9.9249.17	TMEM9	252839	Q9P0T7	0.374981	0.0774767	0.51516
CD59.11514.196	CD59	966	P13987	0.41017	0.0776081	0.51516
KLRC4.10552.88	KLRC4	8302	O43908	0.204663	0.0777978	0.51516
LDHC.9828.86	LDHC	3948	P07864	0.25409	0.0778004	0.51516
TSR3.7018.10	TSR3	115939	Q9UJK0	-0.159278	0.0778814	0.51516
HSPA1A.10721.76	HSPA1A	3303	P0DMV8	0.452605	0.0779283	0.51516
IL15RA.3445.53	IL15RA	3601	Q13261	0.334271	0.0780058	0.51516
EFNA5.2615.60	EFNA5	1946	P52803	0.403537	0.0780481	0.51516
HIF1A.13089.6	HIF1A	3091	Q16665	0.241671	0.0780767	0.51516
BLNK.19225.11	BLNK	29760	Q8WV28	0.198719	0.0781607	0.51516
CCDC101.12788.6	CCDC101		Q96ES7	-0.173635	0.078576	0.516062
THSD1.5621.64	THSD1	55901	Q9NS62	-0.179752	0.078599	0.516062
RBP4.15633.6	RBP4	5950	P02753	0.550714	0.0786075	0.516062
CHMP2B.17350.13	CHMP2B	25978	Q9UQN3	0.619688	0.0787351	0.516221
RAB26.6997.32	RAB26	25837	Q9ULW5	0.334887	0.0789707	0.517087
RBM17.17391.10	RBM17	84991	Q96I25	0.452067	0.0795112	0.519945
ZNF23.11565.58	ZNF23		P17027	-0.207035	0.079723	0.519953
DHX58.14012.17	DHX58	79132	Q96C10	0.182347	0.0797661	0.519953
GRP.8400.74	GRP	2922	P07492	0.201625	0.0798247	0.519953
DPY30.13943.38	DPY30		Q9C005	0.687184	0.0799895	0.520348
CXCL10.4141.79	CXCL10	3627	P02778	0.872073	0.0804554	0.522699
CHKB.7761.125	CHKB	1120	Q9Y259	0.359314	0.0809389	0.525157
AOC1.15486.126	AOC1	26	P19801	0.855763	0.0811166	0.525549
IL15RA.14054.17	IL15RA	3601	Q13261	0.520371	0.0812098	0.525549
LYSMD3.10563.13	LYSMD3	116068	Q7Z3D4	-0.299597	0.0816736	0.527496
HIPK3.19329.31	HIPK3	10114	Q9H422	0.24661	0.0817217	0.527496
PCDHGA12.6938.21	PCDHGA12	26025	O60330	0.265971	0.0820346	0.528832
SMOC2.15635.4	SMOC2	64094	Q9H3U7	0.432651	0.082436	0.530735
FCER2.3291.30	FCER2	2208	P06734	0.542932	0.0827692	0.532194
PDGFRL.9713.67	PDGFRL	5157	Q15198	-0.750603	0.0828818	0.532233
MRPL2.19132.1	MRPL2	51069	Q5T653	-0.187889	0.0830265	0.532478
CER1.6230.56	CER1	9350	O95813	0.219921	0.0832216	0.533045
PSMA4.14099.20	PSMA4	5685	P25789	-0.352371	0.0833698	0.533311
PSMA2.4280.47	PSMA2	5683	P25787	0.344983	0.083822	0.534846
YWHAH.4707.50	YWHAH	7533	Q04917	0.512272	0.0838239	0.534846
RANBP3.14037.18	RANBP3	8498	Q9H6Z4	0.435164	0.0842251	0.535359
S100A9.5339.49	S100A9	6280	P06702	0.61103	0.0842587	0.535359
PRR27.9607.39	PRR27	401137	Q6MZM9	-0.140607	0.0842741	0.535359
ENDOU.5656.53	ENDOU	8909	P21128	0.194384	0.084333	0.535359
TRABD2A.9401.57	TRABD2A	129293	Q86V40	0.456112	0.0844752	0.535581
STX7.8274.64	STX7	8417	O15400	0.440707	0.0846678	0.536122
UBLCP1.19124.9	UBLCP1	134510	Q8WVY7	0.4554	0.084984	0.537443
KLK11.2831.29	KLK11	11012	Q9UBX7	0.277936	0.0851022	0.53751
L3MBTL2.12708.91	L3MBTL2		Q969R5	0.228669	0.085256	0.537802
HS6ST2.13524.25	HS6ST2		Q96MM7	0.522978	0.0856463	0.538598
GDNF.5822.22	GDNF	2668	P39905	0.241116	0.0856942	0.538598
SMEK1.10866.60	SMEK1	55671	Q6IN85	0.394881	0.0857198	0.538598
ERO1LB.7994.41	ERO1LB	56605	Q86YB8	-0.48343	0.0858279	0.538598
CAMK2B.3351.1	CAMK2B	816	Q13554	0.414004	0.0861435	0.538598
APCDD1.6599.5	APCDD1	147495	Q8J025	0.16748	0.0861918	0.538598
ANGPTL1.11142.11	ANGPTL1	9068	O95841	0.335909	0.0862985	0.538598
VPS25.18189.12	VPS25	84313	Q9BRG1	0.529289	0.0863487	0.538598
CHD7.14005.2	CHD7	55636	Q9P2D1	-0.0826382	0.0863837	0.538598
PSAP.6207.10	PSAP	5660	P07602	-0.459989	0.0864603	0.538598
BCAR3.12634.79	BCAR3	8412	O75815	0.223594	0.0869513	0.540312
KLK7.3378.49	KLK7	5650	P49862	-0.330725	0.0869518	0.540312
FHL1.16814.13	FHL1	2273	Q13642	0.127885	0.0873737	0.541365
MAX.12411.60	MAX		P61244	0.554453	0.0874253	0.541365
HERC1.12705.9	HERC1		Q15751	-0.192202	0.0874462	0.541365
ADAMDEC1.9115.78	ADAMDEC1	27299	O15204	0.323868	0.0876733	0.542096
ARID3A.3875.62	ARID3A	1820	Q99856	0.187138	0.0879482	0.542096
ANXA11.17513.11	ANXA11	311	P50995	0.619332	0.0882239	0.542096
TUFT1.5690.49	TUFT1	7286	Q9NNX1	-0.242938	0.0882489	0.542096
PURB.18300.39	PURB	5814	Q96QR8	0.425553	0.0883431	0.542096
SMCO2.7925.18	SMCO2	341346	A6NFE2	0.189523	0.0884427	0.542096
FATE1.7740.33	FATE1	89885	Q969F0	0.217319	0.0885768	0.542096
CPVL.8891.7	CPVL	54504	Q9H3G5	-0.586841	0.0886965	0.542096
PLAUR.2652.15	PLAUR	5329	Q03405	0.336117	0.0888126	0.542096
HDGFRP3.18899.82	HDGFRP3	50810	Q9Y3E1	0.525096	0.0889256	0.542096
HMOX2.2622.18	HMOX2	3163	P30519	0.259793	0.0890469	0.542096
IL22RA1.3620.67	IL22RA1	58985	Q8N6P7	0.390326	0.0892325	0.542096
EFNA2.14124.6	EFNA2	1943	O43921	0.401362	0.0892334	0.542096
HSPA1A.4124.24	HSPA1A	3303	P0DMV8	0.389196	0.0892726	0.542096
KRT72.11566.48	KRT72	140807	Q14CN4	-0.109537	0.0894799	0.542096
TNC.4155.3	TNC	3371	P24821	0.482887	0.0894816	0.542096
FABP1.11516.7	FABP1	2168	P07148	0.335302	0.089496	0.542096
YWHAB.14156.33	YWHAB	7529	P31946	0.564155	0.0895175	0.542096
OMD.5358.3	OMD	4958	Q99983	0.477783	0.0898825	0.543647
FGF5.3065.65	FGF5	2250	P12034	0.266434	0.0903168	0.544187
IGBP1.12358.6	IGBP1	3476	P78318	0.383212	0.0904353	0.544187
CA7.3356.50	CA7	766	P43166	0.2897	0.0905093	0.544187
CD38.11513.92	CD38	952	P28907	0.515802	0.0905577	0.544187
B4GALT6.10832.24	B4GALT6	9331	Q9UBX8	-0.267656	0.0906207	0.544187
IGLL1.6485.59	IGLL1	3543	P15814	-0.5173	0.0906251	0.544187
MLL2.13623.4	MLL2	8085	O14686	0.451478	0.0907683	0.544392
PSTPIP1.19168.71	PSTPIP1	9051	O43586	0.299723	0.090926	0.544407
CD300LB.10713.151	CD300LB	124599	A8K4G0	-0.187671	0.0910764	0.544407
LRRC37A2.8897.3	LRRC37A2	474170	A6NM11	-0.369948	0.0910977	0.544407
MINOS1.7956.11	MINOS1	440574	Q5TGZ0	-0.79145	0.0913106	0.544755
PRRG4.9579.59	PRRG4	79056	Q9BZD6	-0.356356	0.0913741	0.544755
YWHAQ.7625.27	YWHAQ	10971	P27348	0.270783	0.0917191	0.545264
THRA.12527.50	THRA	7067	P10827	0.145776	0.0917518	0.545264
CX3CL1.2827.23	CX3CL1	6376	P78423	0.266477	0.0917869	0.545264
CALY.8924.55	CALY	50632	Q9NYX4	0.298195	0.092186	0.546985
TNC.5738.25	TNC	3371	P24821	0.394578	0.0926648	0.548837
MSMB.10620.21	MSMB	4477	P08118	0.702587	0.0927178	0.548837
ADAM12.4420.7	ADAM12	8038	O43184	0.255669	0.0933552	0.550853
UBTD2.12875.28	UBTD2		Q8WUN7	0.208623	0.0933831	0.550853
VAMP2.17335.18	VAMP2	6844	P63027	-0.42703	0.0934514	0.550853
CALCB.17170.15	CALCB	797	P10092	0.549941	0.0935678	0.550853
IFNGR2.9180.6	IFNGR2	3460	P38484	-0.11475	0.0936541	0.550853
TNFRSF10B.5534.49	TNFRSF10B	8795	O14763	0.321532	0.0937199	0.550853
MFRP.3685.53	MFRP	83552	Q9BY79	0.36481	0.0941144	0.55189
LCN1.11708.2	LCN1	3933	P31025	0.424263	0.0942961	0.55189
CD27.5412.53	CD27	939	P26842	0.28935	0.0944483	0.55189
CDKN1A.18291.8	CDKN1A	1026	P38936	0.169807	0.0944701	0.55189
ABHD12.7825.7	ABHD12	26090	Q8N2K0	-0.197069	0.0945393	0.55189
RELL2.6600.70	RELL2	285613	Q8NC24	-0.14131	0.0947269	0.55189
SERPINA12.6551.94	SERPINA12	145264	Q8IW75	0.690835	0.0948978	0.55189
EIF2S1.19259.176	EIF2S1	1965	P05198	0.3907	0.0951024	0.55189
CILP2.8841.65	CILP2	148113	Q8IUL8	-0.324172	0.0952845	0.55189
BSG.3585.54	BSG	682	P35613	0.302516	0.0952962	0.55189
TCL1B.18276.34	TCL1B	9623	O95988	0.282941	0.0953678	0.55189
TGIF2.9847.21	TGIF2	60436	Q9GZN2	-0.71524	0.0954501	0.55189
NDST1.6927.7	NDST1	3340	P52848	-0.268877	0.095593	0.55189
CXCL14.5730.60	CXCL14	9547	O95715	0.252903	0.0956416	0.55189
CANX.8834.58	CANX	821	P27824	-0.141713	0.095788	0.55189
PTH.19640.2	PTH	5741	P01270	-0.284958	0.0960356	0.55189
LSM4.16854.17	LSM4	25804	Q9Y4Z0	-0.175964	0.0960536	0.55189
SYT5.9099.19	SYT5	6861	O00445	-0.125351	0.096172	0.55189
NXF1.12453.161	NXF1		Q9UBU9	0.305206	0.0962175	0.55189
HAGH.19267.14	HAGH	3029	Q16775	-0.412976	0.0962214	0.55189
GLT8D1.8955.60	GLT8D1	55830	Q68CQ7	0.285984	0.0962938	0.55189
TMED2.10761.5	TMED2	10959	Q15363	0.208708	0.0964299	0.55189
TRAPPC3.14337.1	TRAPPC3		O43617	0.505347	0.0964371	0.55189
IFIT2.9853.3	IFIT2	3433	P09913	0.281422	0.0968039	0.553247
CAB39.17757.86	CAB39	51719	Q9Y376	0.519766	0.0969938	0.553247
PCSK2.15440.57	PCSK2	5126	P16519	-0.131599	0.0970064	0.553247
SOD3.5660.51	SOD3	6649	P08294	0.558439	0.0973623	0.554287
PLEKHA7.12731.12	PLEKHA7		Q6IQ23	0.315995	0.0974107	0.554287
GP6.3194.36	GP6	51206	Q9HCN6	0.474748	0.0976519	0.554722
MAT2B.18392.19	MAT2B	27430	Q9NZL9	0.369993	0.0977276	0.554722
C21orf33.5981.6	C21orf33	8209	P30042	-0.229859	0.0979397	0.554722
AKR1D1.18398.1	AKR1D1	6718	P51857	-0.320287	0.0979569	0.554722
GGA3.11683.19	GGA3		Q9NZ52	0.470507	0.0980424	0.554722
TCEAL3.19112.2	TCEAL3	85012	Q969E4	0.45555	0.0988118	0.557214
FCN3.5462.62	FCN3	8547	O75636	-0.263315	0.09889	0.557214
UNC5C.5139.32	UNC5C	8633	O95185	0.342661	0.0992903	0.557214
TGFB1.2333.72	TGFB1	7040	P01137	0.31209	0.0993333	0.557214
DOK1.16831.7	DOK1		Q99704	0.268265	0.0997651	0.557214
NAA10.17854.33	NAA10	8260	P41227	0.32454	0.0997771	0.557214
CACYBP.12432.23	CACYBP	27101	Q9HB71	0.595065	0.0998082	0.557214
AKR1A1.4192.10	AKR1A1	10327	P14550	0.455997	0.0998115	0.557214
SIGLEC11.8913.22	SIGLEC11	114132	Q96RL6	0.213499	0.0998541	0.557214
RAB39B.12403.30	RAB39B		Q96DA2	0.212279	0.0999103	0.557214
SDC3.16612.28	SDC3	9672	O75056	-0.265574	0.100086	0.557214
CRK.4976.57	CRK	1398	P46108	0.391818	0.100089	0.557214
HTR2A.13556.28	HTR2A	3356	P28223	0.226908	0.100101	0.557214
MAP1LC3B.11608.5	MAP1LC3B		Q9GZQ8	0.320612	0.100386	0.557214
DNAJA2.11582.63	DNAJA2	10294	O60884	0.170708	0.100586	0.557214
MYZAP.9055.81	MYZAP	100820829	P0CAP1	-0.0953805	0.100597	0.557214
ANGPTL1.9092.33	ANGPTL1	9068	O95841	0.198505	0.100612	0.557214
TNS2.11667.29	TNS2		Q63HR2	0.183753	0.100704	0.557214
MUC1.9176.3	MUC1	4582	P15941	0.249626	0.100734	0.557214
MRAS.18297.8	MRAS	22808	O14807	0.20766	0.100771	0.557214
FEV.12740.55	FEV		Q99581	0.548547	0.100825	0.557214
SF3B4.13449.25	SF3B4		Q15427	0.174614	0.101371	0.559337
ID2.15403.53	ID2	3398	Q02363	0.300672	0.101433	0.559337
ASRGL1.18313.4	ASRGL1	80150	Q7L266	0.321075	0.1024	0.562705
AP2A2.13621.31	AP2A2	161	O94973	0.351602	0.102414	0.562705
CD177.13116.25	CD177	57126	Q8N6Q3	0.692398	0.102527	0.562705
RTN4R.5105.2	RTN4R	65078	Q9BZR6	0.298235	0.102603	0.562705
IL16.2774.10	IL16	3603	Q14005	0.44608	0.102621	0.562705
ILF3.12759.47	ILF3	3609	Q12906	0.34545	0.10272	0.562705
TFPI.3336.50	TFPI	7035	P10646	0.321635	0.102943	0.563312
ARF6.12425.104	ARF6	382	P62330	0.147524	0.103136	0.563591
MFAP3L.8837.8	MFAP3L	9848	O75121	-0.188592	0.103308	0.563591
TRIL.6527.1	TRIL	9865	Q7L0X0	-0.273436	0.103332	0.563591
STX3.7186.111	STX3	6809	Q13277	0.241186	0.103447	0.563599
OMP.18240.6	OMP	4975	P47874	0.174745	0.104053	0.564418
HMGB2.6913.189	HMGB2	3148	P26583	0.280665	0.104362	0.564418
CALN1.10933.107	CALN1	83698	Q9BXU9	0.177111	0.104373	0.564418
NTN1.6649.51	NTN1	9423	O95631	1.13055	0.104416	0.564418
B3GAT3.6897.38	B3GAT3	26229	O94766	-0.253335	0.104497	0.564418
COMP.8043.153	COMP	1311	P49747	0.357786	0.104502	0.564418
PSMD10.18385.4	PSMD10	5716	O75832	0.258952	0.104659	0.564418
AMY1A.7918.114	AMY1A	276	P04745	-0.524749	0.104679	0.564418
SPON1.4297.62	SPON1	10418	Q9HCB6	0.416992	0.104689	0.564418
TPI1.4309.59	TPI1	7167	P60174	0.441953	0.104727	0.564418
EXOSC3.12605.1	EXOSC3	51010	Q9NQT5	-0.722344	0.104905	0.564662
CCL26.9168.31	CCL26	10344	Q9Y258	0.199042	0.105079	0.564662
MUC1.10623.19	MUC1	4582	P15941	0.648002	0.105111	0.564662
BAG2.19228.11	BAG2	9532	O95816	0.1287	0.105447	0.565221
FOLR1.17455.42	FOLR1	2348	P15328	0.475944	0.105562	0.565221
HCAR2.13495.48	HCAR2		Q8TDS4	-0.435684	0.105634	0.565221
FNDC4.13451.2	FNDC4	64838	Q9H6D8	0.395114	0.105668	0.565221
RAP1GAP.13735.1	RAP1GAP		P47736	-0.265556	0.10587	0.565696
PCBP1.11458.30	PCBP1	5093	Q15365	0.379603	0.106442	0.568146
PYY.3727.35	PYY	5697	P10082	0.553297	0.106928	0.568692
SUN3.8852.10	SUN3	256979	Q8TAQ9	-0.33259	0.106952	0.568692
RGS1.18945.11	RGS1	5996	Q08116	0.304372	0.106988	0.568692
PSME3.5204.13	PSME3	10197	P61289	-0.121934	0.107055	0.568692
IL3.4717.55	IL3	3562	P08700	0.208237	0.107113	0.568692
UBC.6647.55	UBC	7316	P0CG48	-0.291861	0.107337	0.569274
GSTT2B.11273.176	GSTT2B	2953	P0CG30	-0.259939	0.107636	0.570254
EEA1.14043.12	EEA1	8411	Q15075	-0.157976	0.10788	0.570535
CPD.7917.17	CPD	1362	O75976	0.174484	0.107917	0.570535
TOR1AIP1.10606.34	TOR1AIP1	26092	Q5JTV8	0.296585	0.108103	0.570912
FOXM1.10056.5	FOXM1	2305	Q08050	0.384832	0.108417	0.571348
GSKIP.12849.25	GSKIP		Q9P0R6	-0.331672	0.108624	0.571348
MUCL1.10975.59	MUCL1	118430	Q96DR8	0.712758	0.108679	0.571348
AMBP.15453.3	AMBP	259	P02760	0.283167	0.108751	0.571348
SWAP70.13552.7	SWAP70	23075	Q9UH65	0.307661	0.108757	0.571348
B3GNT2.7980.72	B3GNT2	10678	Q9NY97	-0.368702	0.109044	0.571837
GFER.15398.2	GFER	2671	P55789	0.366707	0.109262	0.571837
FCRL3.4440.15	FCRL3	115352	Q96P31	0.369674	0.109318	0.571837
CLCA1.10496.11	CLCA1	1179	A8K7I4	0.537828	0.109328	0.571837
KRT5.11177.16	KRT5	3852	P13647	0.443196	0.109423	0.571837
ANXA1.4960.72	ANXA1	301	P04083	0.609297	0.109654	0.572405
ITIH3.7145.1	ITIH3	3699	Q06033	0.348468	0.109761	0.572405
FGF7.4487.1	FGF7	2252	P21781	0.308752	0.110474	0.575523
FGF19.13724.27	FGF19	9965	O95750	0.534252	0.110716	0.576183
ALK.8249.124	ALK	238	Q9UM73	0.193666	0.111013	0.57713
ARHGAP1.9815.5	ARHGAP1	392	Q07960	0.381522	0.111519	0.578863
SYK.10722.13	SYK	6850	P43405	0.218455	0.111578	0.578863
CLEC11A.2966.65	CLEC11A	6320	Q9Y240	0.458412	0.111957	0.579612
CLEC2A.10953.14	CLEC2A	387836	Q6UVW9	-0.146082	0.11215	0.579612
COL1A1.13484.69	COL1A1	1277	P02452	0.158279	0.112221	0.579612
UTS2B.6290.3	UTS2B	257313	Q765I0	0.200995	0.112229	0.579612
HAVCR2.5134.52	HAVCR2	84868	Q8TDQ0	0.329699	0.112352	0.579612
GDF11.14587.16	GDF11	10220	O95390	-0.492341	0.112495	0.579612
VEGFB.9453.12	VEGFB	7423	P49765	-0.225118	0.112792	0.579612
CST7.3302.58	CST7	8530	O76096	0.547124	0.112833	0.579612
CUL4B.13743.56	CUL4B		Q13620	0.240853	0.112876	0.579612
ZNF10.11567.23	ZNF10		P21506	0.189583	0.112888	0.579612
AMICA1.5094.62	AMICA1	120425	Q86YT9	-0.173091	0.113218	0.579612
MYOC.16558.2	MYOC	4653	Q99972	0.394955	0.113228	0.579612
STK16.3471.49	STK16	8576	O75716	0.240172	0.113231	0.579612
RMDN3.9290.8	RMDN3	55177	Q96TC7	0.390806	0.113383	0.579798
ERBB2.2616.23	ERBB2	2064	P04626	0.319478	0.113587	0.580244
MYZAP.9964.10	MYZAP	100820829	P0CAP1	-0.474598	0.113729	0.58038
CCDC25.18264.12	CCDC25	55246	Q86WR0	-0.372384	0.114499	0.58371
LRP12.15506.34	LRP12	29967	Q9Y561	0.186798	0.114681	0.583851
UBE2V1.11626.7	UBE2V1	387522	Q13404	0.40428	0.114849	0.583851
FCN2.3313.21	FCN2	2220	Q15485	-0.482942	0.114877	0.583851
ADAM15.9956.7	ADAM15	8751	Q13444	0.144353	0.115152	0.583868
ICAM1.4342.10	ICAM1	3383	P05362	0.411331	0.115226	0.583868
CYB5R3.7215.18	CYB5R3	1727	P00387	0.53111	0.115231	0.583868
DUSP3.3480.7	DUSP3	1845	P51452	0.294986	0.115369	0.583977
INHBA.INHBC.18814.21	INHBA INHBC	3624	P08476 P55103	0.301992	0.115593	0.584116
CRLF1.14747.9	CRLF1		O75462	0.496714	0.115667	0.584116
OLA1.12659.13	OLA1	29789	Q9NTK5	0.372449	0.115765	0.584116
CREB3L2.17336.54	CREB3L2		Q70SY1	0.186595	0.115878	0.584116
MOG.15619.49	MOG	4340	Q16653	-0.11584	0.116	0.584116
NAPB.12655.30	NAPB	63908	Q9H115	-0.177332	0.116142	0.584116
SPINK4.19213.1	SPINK4	27290	O60575	0.314163	0.116215	0.584116
NOTCH2.11297.54	NOTCH2	4853	Q04721	-0.27558	0.116604	0.585057
PARVA.13434.172	PARVA	55742	Q9NVD7	0.345775	0.116637	0.585057
PRKAR1B.12479.50	PRKAR1B	5575	P31321	0.385999	0.117065	0.586617
LECT1.9928.125	LECT1	11061	O75829	0.298223	0.117237	0.586889
UBE2K.17380.2	UBE2K	3093	P61086	0.351671	0.117912	0.588956
PPIL2.14314.6	PPIL2		Q13356	-0.191674	0.11794	0.588956
IDI1.17712.7	IDI1	3422	Q13907	0.379109	0.118084	0.588956
MAPKAPK5.8382.47	MAPKAPK5	8550	Q8IW41	-0.537064	0.118159	0.588956
FGFRL1.6237.11	FGFRL1	53834	Q8N441	0.694854	0.118239	0.588956
ITGAL.11617.1	ITGAL	3683	P20701	0.177395	0.118807	0.591185
FGF22.9513.9	FGF22	27006	Q9HCT0	0.217099	0.119038	0.591185
PREP.14273.19	PREP	5550	P48147	0.322948	0.119042	0.591185
SPINK14.8587.21	SPINK14	408187	Q6IE38	0.232265	0.119425	0.591277
MAPK3.2855.49	MAPK3	5595	P27361	0.410732	0.119713	0.591277
GABBR1.11279.42	GABBR1		Q9UBS5	0.221248	0.119812	0.591277
SPOCK2.5491.12	SPOCK2	9806	Q92563	-0.334465	0.119938	0.591277
BAG1.17195.43	BAG1	573	Q99933	0.348581	0.119981	0.591277
TMEM154.11223.1	TMEM154		Q6P9G4	0.203452	0.120003	0.591277
FCN2.13717.15	FCN2	2220	Q15485	-0.318263	0.120026	0.591277
CTSC.3178.5	CTSC	1075	P53634	-0.0893079	0.120107	0.591277
CRABP2.11696.7	CRABP2	1382	P29373	0.457119	0.120136	0.591277
NFKBIA.19209.6	NFKBIA	4792	P25963	-0.266398	0.120244	0.591277
DEFB4A.13397.88	DEFB4A	100289462	O15263	1.13617	0.120607	0.592057
DNASE2B.6533.20	DNASE2B	58511	Q8WZ79	-0.106302	0.120651	0.592057
EID3.8079.39	EID3	493861	Q8N140	-0.223312	0.120877	0.592057
PTP4A1.17812.2	PTP4A1	7803	Q93096	-0.443762	0.120905	0.592057
DOT1L.12692.56	DOT1L		Q8TEK3	0.293942	0.120995	0.592057
DCTN2.5879.51	DCTN2	10540	Q13561	0.231789	0.121143	0.592203
ADH1C.15525.294	ADH1C	126	P00326	-0.91591	0.121282	0.592301
USB1.11328.9	USB1		Q9BQ65	-0.0830945	0.122078	0.595605
ARG2.17752.24	ARG2	384	P78540	0.365428	0.122434	0.595938
YEATS4.17474.106	YEATS4		O95619	0.141133	0.122479	0.595938
CD72.7009.8	CD72	971	P21854	0.26536	0.122556	0.595938
SHANK1.13240.170	SHANK1		Q9Y566	-0.206214	0.122684	0.595938
NLGN2.9027.10	NLGN2	57555	Q8NFZ4	0.111883	0.122742	0.595938
FAM3B.5618.50	FAM3B	54097	P58499	0.325413	0.122973	0.596239
UGT1A8.8899.75	UGT1A8	54576	Q9HAW9	-0.227344	0.123043	0.596239
GPI.4272.46	GPI	2821	P06744	0.408354	0.123412	0.596364
KMT2C.11402.17	KMT2C		Q8NEZ4	-0.183227	0.12342	0.596364
FN1.3434.34	FN1	2335	P02751	0.541673	0.123445	0.596364
FGB.18890.227	FGB	2244	P02675	-0.163568	0.123652	0.596364
ITGB5.7755.37	ITGB5	3693	P18084	-0.169748	0.123686	0.596364
PROS1.2700.56	PROS1	5627	P07225	0.256068	0.123805	0.596364
BOLA3.5980.55	BOLA3	388962	Q53S33	0.423299	0.123974	0.596364
CDK2AP2.18227.3	CDK2AP2	10263	O75956	-0.172212	0.124104	0.596364
PSMG3.12729.12	PSMG3		Q9BT73	0.271076	0.124143	0.596364
PMEL.6472.40	PMEL	6490	P40967	0.544277	0.124588	0.597926
ARHGAP30.12807.89	ARHGAP30		Q7Z6I6	0.173163	0.124836	0.598292
LRRC25.9317.4	LRRC25	126364	Q8N386	-0.292542	0.124904	0.598292
MYC.10362.35	MYC	4609	P01106	-0.381996	0.125034	0.598344
DDX6.12869.68	DDX6		P26196	0.52934	0.12549	0.599457
DLK1.6496.60	DLK1	8788	P80370	0.436738	0.125618	0.599457
ESAM.7841.84	ESAM	90952	Q96AP7	0.308991	0.125687	0.599457
ENSA.17734.13	ENSA	2029	O43768	0.456548	0.125864	0.599457
SPTAN1.5031.10	SPTAN1	6709	Q13813	0.114105	0.125883	0.599457
SIGLEC1.4464.10	SIGLEC1	6614	Q9BZZ2	-0.208569	0.126004	0.599457
LRMP.10704.91	LRMP	4033	Q12912	0.311859	0.126107	0.599457
PDIA4.7146.16	PDIA4	9601	P13667	0.156155	0.126601	0.600682
DSC3.4981.6	DSC3	1825	Q14574	-0.115079	0.126701	0.600682
LGALS4.2982.82	LGALS4	3960	P56470	0.223595	0.126725	0.600682
PDE6D.13491.40	PDE6D		O43924	0.339385	0.12714	0.601531
OPALIN.7736.28	OPALIN	93377	Q96PE5	-0.188372	0.127145	0.601531
DLG2.19620.16	DLG2	1740	Q15700	0.345749	0.127436	0.601852
CXCL1.2985.35	CXCL1	2919	P09341	0.384527	0.127454	0.601852
GJA1.9937.7	GJA1	2697	P17302	0.185658	0.127607	0.602006
POSTN.3457.57	POSTN	10631	Q15063	0.379243	0.127796	0.602327
TNC.7131.207	TNC	3371	P24821	0.34851	0.128354	0.604391
ID1.15402.2	ID1	3397	P41134	0.610346	0.128512	0.60442
INS.4883.56	INS	3630	P01308	-0.253599	0.128971	0.60442
GNG11.18282.1	GNG11	2791	P61952	-0.149286	0.129019	0.60442
IL21.7124.18	IL21	59067	Q9HBE4	0.221584	0.12902	0.60442
C16orf54.12394.53	C16orf54	283897	Q6UWD8	-0.358735	0.129068	0.60442
DCBLD1.9402.18	DCBLD1	285761	Q8N8Z6	0.188787	0.129086	0.60442
PDRG1.12593.33	PDRG1		Q9NUG6	0.268138	0.129344	0.604635
DDX19B.5460.60	DDX19B	11269	Q9UMR2	0.457122	0.129374	0.604635
TNFSF14.5988.49	TNFSF14	8740	O43557	-0.128975	0.129596	0.605103
PGF.3078.1	PGF	5228	P49763	0.134465	0.12973	0.605162
EFNB2.14131.37	EFNB2	1948	P52799	0.400962	0.129973	0.605734
TARDBP.12046.51	TARDBP	23435	Q13148	-0.152578	0.13019	0.606176
PPIA.3844.2	PPIA	5478	P62937	0.351893	0.130453	0.60631
LIN7B.15612.5	LIN7B	64130	Q9HAP6	0.229797	0.130481	0.60631
LGI3.8003.57	LGI3	203190	Q8N145	-0.112952	0.130636	0.60631
CCL18.3044.3	CCL18	6362	P55774	-0.265297	0.130704	0.60631
CD4.3143.3	CD4	920	P01730	0.275117	0.131367	0.607952
HGF.2681.23	HGF	3082	P14210	0.728014	0.13162	0.607952
EVL.11656.110	EVL	51466	Q9UI08	0.27025	0.131656	0.607952
PGAM1.3896.5	PGAM1	5223	P18669	1.23291	0.131709	0.607952
HOPX.19196.73	HOPX	84525	Q9BPY8	0.521142	0.131712	0.607952
TNC.6260.14	TNC	3371	P24821	0.323918	0.131901	0.607952
VCAN.9561.21	VCAN	1462	P13611	-0.135466	0.13191	0.607952
CRTAM.7968.15	CRTAM	56253	O95727	-0.474452	0.132126	0.608324
ANGPTL4.3796.79	ANGPTL4	51129	Q9BY76	0.348135	0.132334	0.608324
SPINK7.10974.20	SPINK7	84651	P58062	0.451931	0.132409	0.608324
TTN.11352.42	TTN	7273	Q8WZ42	0.322892	0.132627	0.608324
VASN.5682.13	VASN	114990	Q6EMK4	0.225778	0.13263	0.608324
RGS19.12713.365	RGS19	10287	P49795	0.361979	0.132721	0.608324
GDF9.3067.67	GDF9	2661	O60383	0.299695	0.132923	0.60869
FRZB.13740.51	FRZB	2487	Q92765	0.620552	0.133182	0.609319
ARHGDIA.6454.38	ARHGDIA	396	P52565	0.235456	0.133389	0.609709
F5.4906.35	F5	2153	P12259	0.324873	0.133597	0.610103
GCSH.10956.82	GCSH	2653	P23434	-0.373434	0.133997	0.611367
PNLIPRP2.15471.29	PNLIPRP2	5408	P54317	-0.53588	0.134561	0.612897
ITGA5.6932.42	ITGA5	3678	P08648	-0.136125	0.134577	0.612897
TNFAIP8.12563.2	TNFAIP8		O95379	0.4361	0.134719	0.612984
LGALS3BP.5000.52	LGALS3BP	3959	Q08380	-0.358408	0.135374	0.614871
DLK1.6373.54	DLK1	8788	P80370	0.449391	0.135785	0.614871
GGA1.13594.158	GGA1		Q9UJY5	0.36445	0.135933	0.614871
PSMB1.12612.37	PSMB1	5689	P20618	0.447067	0.135985	0.614871
INSRR.6352.8	INSRR	3645	P14616	0.303687	0.136065	0.614871
SQSTM1.15448.47	SQSTM1	8878	Q13501	-0.181387	0.136306	0.614871
SUGT1.17818.22	SUGT1	10910	Q9Y2Z0	0.313364	0.13634	0.614871
C1R.3285.23	C1R	715	P00736	-0.289138	0.136634	0.614871
PIWIL1.12793.4	PIWIL1		Q96J94	-0.123	0.13664	0.614871
PECAM1.2695.25	PECAM1	5175	P16284	0.25631	0.136798	0.614871
MED1.3892.21	MED1	5469	Q15648	0.279649	0.137023	0.614871
GCNT4.10842.7	GCNT4	51301	Q9P109	-0.120721	0.137058	0.614871
GBP2.18891.98	GBP2	2634	P32456	0.372521	0.137085	0.614871
PCSK7.4459.68	PCSK7	9159	Q16549	-0.300264	0.137146	0.614871
MTHFSD.19129.15	MTHFSD	64779	Q2M296	0.285731	0.137278	0.614871
COL6A2.16753.46	COL6A2	1292	P12110	0.15815	0.137283	0.614871
RAMP1.15436.40	RAMP1	10267	O60894	-0.171936	0.137499	0.614871
N6AMT1.11096.57	N6AMT1	29104	Q9Y5N5	0.206429	0.137629	0.614871
NUDT9.9482.110	NUDT9	53343	Q9BW91	0.314685	0.137686	0.614871
STX1B.6966.144	STX1B	112755	P61266	-0.102989	0.137755	0.614871
EDIL3.9360.33	EDIL3	10085	O43854	-0.428316	0.137779	0.614871
TKT.4306.4	TKT	7086	P29401	0.365513	0.138021	0.614871
CHRDL1.3362.61	CHRDL1	91851	Q9BU40	0.342425	0.138025	0.614871
CUL3.10045.47	CUL3	8452	Q13618	0.380044	0.138088	0.614871
CDC42BPB.3629.60	CDC42BPB	9578	Q9Y5S2	0.260025	0.138309	0.61531
RPS4X.9758.17	RPS4X	6191	P62701	0.508199	0.138637	0.615618
CADM3.3630.27	CADM3	57863	Q8N126	0.187245	0.13864	0.615618
YY1.17337.1	YY1	7528	P25490	-0.253091	0.138755	0.615618
B3GALT6.7981.230	B3GALT6	126792	Q96L58	-0.15863	0.138871	0.615618
COL25A1.7006.4	COL25A1	84570	Q9BXS0	-0.139224	0.139125	0.615914
C7orf73.8927.6	C7orf73	647087	E0CX11	-0.260658	0.139194	0.615914
COL6A5.11155.16	COL6A5		A8TX70	-0.35958	0.139436	0.615914
CNGA2.12872.35	CNGA2		Q16280	-0.138228	0.139499	0.615914
CCDC80.3234.23	CCDC80	151887	Q76M96	0.325627	0.139649	0.615914
CD8A.15462.28	CD8A	925	P01732	0.375257	0.139891	0.615914
CHP1.12458.79	CHP1		Q99653	0.263104	0.13993	0.615914
FETUB.3367.8	FETUB	26998	Q9UGM5	-0.417262	0.139942	0.615914
S100A11.14011.17	S100A11	6282	P31949	0.292303	0.140403	0.615914
TXNDC15.6366.38	TXNDC15	79770	Q96J42	-0.340741	0.140514	0.615914
IGSF9B.9060.27	IGSF9B	22997	Q9UPX0	0.133854	0.140666	0.615914
SPR.9287.6	SPR	6697	P35270	0.643321	0.14073	0.615914
HAT1.19327.31	HAT1	8520	O14929	-0.290481	0.140763	0.615914
CRKL.9877.28	CRKL	1399	P46109	0.381886	0.140774	0.615914
UST.8364.74	UST	10090	Q9Y2C2	-0.22876	0.140788	0.615914
C11orf68.8307.47	C11orf68	83638	Q9H3H3	0.39621	0.140964	0.616148
PFDN5.4271.75	PFDN5	5204	Q99471	0.21322	0.141323	0.616689
CD14.8969.49	CD14	929	P08571	0.282698	0.141335	0.616689
PTK2B.11395.5	PTK2B	2185	Q14289	0.282024	0.141674	0.617629
CA4.14069.61	CA4	762	P22748	-0.127323	0.1421	0.618948
UBE2G1.17158.17	UBE2G1		P62253	0.552585	0.142385	0.619244
SAA1.15515.2	SAA1	6288	P0DJI8	0.908306	0.142416	0.619244
OAF.6414.8	OAF	220323	Q86UD1	0.223791	0.142797	0.62008
MMAB.17783.9	MMAB	326625	Q96EY8	0.421129	0.142857	0.62008
DENR.19287.59	DENR	8562	O43583	0.369678	0.143316	0.621216
NFATC1.14286.2	NFATC1	4772	O95644	-0.133186	0.143632	0.621216
FANCF.11336.9	FANCF		Q9NPI8	0.179585	0.143712	0.621216
PRSS57.8351.17	PRSS57	400668	Q6UWY2	0.589553	0.143875	0.621216
LDHB.3890.8	LDHB	3945	P07195	0.36846	0.144115	0.621216
SPIN1.18210.12	SPIN1	10927	Q9Y657	-0.145597	0.14423	0.621216
KIR2DL5A.8000.17	KIR2DL5A	57292	Q8N109	-0.881071	0.14424	0.621216
CD300C.5066.134	CD300C	10871	Q08708	0.374071	0.144303	0.621216
SNRPB2.17364.8	SNRPB2	6629	P08579	0.612281	0.144494	0.621216
FCRL5.6103.70	FCRL5	83416	Q96RD9	0.227982	0.14458	0.621216
SMIM9.8888.33	SMIM9	100132963	A6NGZ8	-0.301671	0.144774	0.621216
DNAJB12.8006.12	DNAJB12	54788	Q9NXW2	0.437331	0.14483	0.621216
CSN2.16587.1	CSN2	1447	P05814	-0.425374	0.144978	0.621216
PCDHA4.7157.22	PCDHA4	56144	Q9UN74	-0.334647	0.145021	0.621216
FLNA.11171.25	FLNA	2316	P21333	0.294576	0.145258	0.621216
C1QTNF5.7810.20	C1QTNF5	114902	Q9BXJ0	-0.256448	0.145328	0.621216
CYTL1.8402.22	CYTL1	54360	Q9NRR1	0.466375	0.145531	0.621216
HARS.17450.51	HARS	3035	P12081	0.405023	0.145827	0.621216
AHSG.3581.53	AHSG	197	P02765	-0.227348	0.145941	0.621216
CANT1.6480.1	CANT1	124583	Q8WVQ1	0.2995	0.146089	0.621216
SEPHS1.14083.25	SEPHS1		P49903	0.322182	0.146109	0.621216
VSTM2L.6549.60	VSTM2L	128434	Q96N03	0.247737	0.146227	0.621216
ASNA1.13620.10	ASNA1	439	O43681	0.269423	0.146331	0.621216
OAS1.10361.25	OAS1	4938	P00973	0.359156	0.146403	0.621216
ADAMTS1.3174.2	ADAMTS1	9510	Q9UHI8	0.220826	0.146709	0.621216
ADAMTS5.3168.8	ADAMTS5	11096	Q9UNA0	0.136405	0.146745	0.621216
GSTA1.17138.8	GSTA1	2938	P08263	-0.328241	0.146751	0.621216
IL24.3321.2	IL24	11009	Q13007	0.233174	0.146776	0.621216
SYT2.9577.26	SYT2	127833	Q8N9I0	-0.203329	0.146851	0.621216
GUK1.17325.10	GUK1	2987	Q16774	0.319151	0.147128	0.621216
CTNNB1.8424.269	CTNNB1	1499	P35222	-0.280251	0.147128	0.621216
PRSS35.9983.97	PRSS35	167681	Q8N3Z0	-0.195665	0.147227	0.621216
CLEC11A.4500.50	CLEC11A	6320	Q9Y240	0.442214	0.147311	0.621216
TREML1.11147.17	TREML1	340205	Q86YW5	-0.263995	0.147467	0.621216
HSD17B11.17397.8	HSD17B11	51170	Q8NBQ5	0.212095	0.14747	0.621216
IL17D.4136.40	IL17D	53342	Q8TAD2	0.208652	0.148812	0.625455
PMP2.15422.12	PMP2		P02689	0.205691	0.148835	0.625455
PPM1D.11315.148	PPM1D	8493	O15297	0.115256	0.149164	0.625455
CENPV.8817.29	CENPV	201161	Q7Z7K6	-0.329235	0.149205	0.625455
ALKBH2.18400.52	ALKBH2	121642	Q6NS38	-0.33338	0.149387	0.625455
KDR.3651.50	KDR	3791	P35968	-0.22894	0.149712	0.625455
C1D.7821.6	C1D	10438	Q13901	-0.146335	0.14977	0.625455
PLA2R1.10916.44	PLA2R1	22925	Q13018	-0.395937	0.149834	0.625455
PIK3C2A.14028.22	PIK3C2A		O00443	-0.15246	0.149906	0.625455
ASPA.18187.16	ASPA	443	P45381	0.27213	0.149956	0.625455
BDH2.17329.2	BDH2	56898	Q9BUT1	0.252803	0.150288	0.625455
ATG7.12627.97	ATG7	10533	O95352	0.357924	0.150331	0.625455
SH3BGRL3.17490.4	SH3BGRL3	83442	Q9H299	0.394613	0.150364	0.625455
MIF.8221.19	MIF	4282	P14174	0.649704	0.150464	0.625455
CKS1B.12530.14	CKS1B	1163	P61024	0.24025	0.150471	0.625455
S100A3.15297.3	S100A3	6274	P33764	0.234612	0.150571	0.625455
EIF4A3.4997.19	EIF4A3	9775	P38919	0.173931	0.150605	0.625455
LILRB3.11334.7	LILRB3		O75022	0.139278	0.15084	0.62591
QSOX2.8397.147	QSOX2	169714	Q6ZRP7	-0.267969	0.151514	0.628185
ADGRG5.4551.72	ADGRG5	221188	Q8IZF4	0.195008	0.151714	0.628492
CERS5.13494.6	CERS5		Q8N5B7	0.150827	0.152555	0.631112
PAXIP1.12894.3	PAXIP1		Q6ZW49	0.226037	0.152599	0.631112
CYGB.11546.7	CYGB	114757	Q8WWM9	0.22594	0.15275	0.631217
IL34.4556.10	IL34	146433	Q6ZMJ4	-0.290185	0.152906	0.631338
PLSCR3.11407.57	PLSCR3	57048	Q9NRY6	-0.208475	0.153297	0.631872
ITM2C.10560.1	ITM2C	81618	Q9NQX7	-0.169832	0.153371	0.631872
MBD4.3891.56	MBD4	8930	O95243	0.215393	0.153415	0.631872
FIGF.13098.93	FIGF	2277	O43915	0.409352	0.153541	0.631872
PROL1.6530.63	PROL1	58503	Q99935	-0.104429	0.153685	0.631943
CCT8.12699.28	CCT8	10694	P50990	0.378399	0.153879	0.63222
CD86.5337.64	CD86	942	P42081	-0.202478	0.154148	0.632237
DUSP23.17326.44	DUSP23		Q9BVJ7	-0.182449	0.154206	0.632237
CREB3L1.11198.37	CREB3L1	90993	Q96BA8	0.215931	0.154443	0.632237
RHOA.9855.10	RHOA	387	P61586	0.428365	0.154464	0.632237
SAA2.18832.65	SAA2	6289	P0DJI9	1.06192	0.154516	0.632237
FAAH2.8396.42	FAAH2	158584	Q6GMR7	-0.183902	0.155105	0.632819
CASQ1.11263.57	CASQ1		P31415	-0.156416	0.155114	0.632819
MPG.12438.127	MPG	4350	P29372	0.334696	0.155137	0.632819
LOC652493.6561.77	LOC652493	652493		-0.189476	0.155299	0.632819
MORF4L1.18193.165	MORF4L1	10933	Q9UBU8	0.290285	0.155406	0.632819
TCP11.8334.65	TCP11	6954	Q8WWU5	-0.144183	0.155418	0.632819
ADRBK1.3347.9	ADRBK1	156	P25098	0.481565	0.155726	0.633368
FABP5.4985.11	FABP5	2171	Q01469	0.134103	0.155807	0.633368
COL13A1.6570.1	COL13A1	1305	Q5TAT6	-0.192064	0.156201	0.634454
COL11A2.11278.4	COL11A2	1302	P13942	-0.388589	0.156595	0.634655
CRYGD.12366.16	CRYGD	1421	P07320	0.136484	0.156648	0.634655
SCUBE3.16773.29	SCUBE3	222663	Q8IX30	0.860144	0.156681	0.634655
SEMA3B.5667.3	SEMA3B	7869	Q13214	0.199361	0.156883	0.634655
IDUA.3169.70	IDUA	3425	P35475	-0.337774	0.156885	0.634655
FEN1.12577.100	FEN1	2237	P39748	-0.218544	0.157498	0.635778
CNTNAP2.6965.19	CNTNAP2	26047	Q9UHC6	-0.136818	0.157582	0.635778
MLF1.17820.170	MLF1	4291	P58340	-0.145544	0.157815	0.635778
TNMD.6578.29	TNMD	64102	Q9H2S6	0.223637	0.157854	0.635778
SCARA3.11292.13	SCARA3	51435	Q6AZY7	-0.0892438	0.158235	0.635778
IFNA5.6210.100	IFNA5	3442	P01569	-0.136014	0.158488	0.635778
IST1.12434.25	IST1	9798	P53990	0.270619	0.158548	0.635778
SF1.12777.11	SF1	7536	Q15637	0.176744	0.158769	0.635778
ITIH4.4811.33	ITIH4	3700	Q14624	0.185665	0.158875	0.635778
FGFR3.3809.1	FGFR3	2261	P22607	0.237378	0.159188	0.635778
STX10.12842.43	STX10		O60499	-0.288571	0.159201	0.635778
SUMF1.6941.11	SUMF1	285362	Q8NBK3	0.312308	0.159214	0.635778
GMEB2.12804.5	GMEB2		Q9UKD1	-0.267287	0.159463	0.635778
SIGLEC15.10847.1	SIGLEC15	284266	Q6ZMC9	0.111356	0.159545	0.635778
NLGN3.17427.26	NLGN3	54413	Q9NZ94	-0.179943	0.159576	0.635778
NLRP10.12821.6	NLRP10		Q86W26	-0.20639	0.159665	0.635778
PLA2G2C.8850.5	PLA2G2C	391013	Q5R387	0.200368	0.15979	0.635778
TNFRSF8.2605.49	TNFRSF8	943	P28908	0.265813	0.159813	0.635778
HRSP12.14636.25	HRSP12	10247	P52758	0.495328	0.159834	0.635778
BRF1.19596.18	BRF1	2972	Q92994	-0.469632	0.160078	0.635778
TTC17.9550.153	TTC17	55761	Q96AE7	0.228809	0.160387	0.635778
NDUFS4.10584.7	NDUFS4	4724	O43181	-0.46596	0.16048	0.635778
ARHGEF2.12848.9	ARHGEF2	9181	Q92974	-0.158397	0.160526	0.635778
INHBC.15686.49	INHBC	3626	P55103	0.673206	0.160563	0.635778
CDKN2D.12376.85	CDKN2D	1032	P55273	0.377905	0.160726	0.635778
IL32.9051.13	IL32	9235	P24001	-0.26396	0.160947	0.635778
GEM.12817.1	GEM		P55040	-0.237238	0.160966	0.635778
DUSP15.12838.28	DUSP15		Q9H1R2	-0.288221	0.16099	0.635778
UNC5B.7776.20	UNC5B	219699	Q8IZJ1	0.373786	0.161006	0.635778
COL23A1.4543.65	COL23A1	91522	Q86Y22	0.211449	0.161052	0.635778
GLIPR2.15522.2	GLIPR2	152007	Q9H4G4	-0.299571	0.161108	0.635778
CES1.15487.164	CES1	1066	P23141	-0.239191	0.16126	0.635874
IL11.4493.92	IL11	3589	P20809	0.167163	0.161848	0.637353
PPARA.12954.71	PPARA	5465	Q07869	-0.205606	0.16189	0.637353
PRPF6.9581.4	PRPF6	24148	O94906	-0.194908	0.162184	0.637609
ARL5B.17404.5	ARL5B	221079	Q96KC2	0.222936	0.16221	0.637609
ZNF560.12543.76	ZNF560		Q96MR9	0.39592	0.163011	0.640139
BRAF.15669.7	BRAF	673	P15056	-0.248197	0.163239	0.640139
C4BPA.9449.150	C4BPA	722	P04003	0.266101	0.163386	0.640139
KPNA1.19587.12	KPNA1	3836	P52294	0.203334	0.163537	0.640139
CAMK1.3592.4	CAMK1	8536	Q14012	0.255736	0.16362	0.640139
PIANP.14114.18	PIANP	196500	Q8IYJ0	0.317306	0.163668	0.640139
PMEPA1.6936.7	PMEPA1	56937	Q969W9	0.11373	0.16383	0.640139
USP25.9215.117	USP25	29761	Q9UHP3	0.216283	0.163879	0.640139
RAB3B.16847.39	RAB3B	5865	P20337	-0.497063	0.164408	0.641704
HDHD2.13472.35	HDHD2	84064	Q9H0R4	0.370284	0.164717	0.642407
HAVCR1.9021.1	HAVCR1	26762	Q96D42	0.680136	0.164851	0.642431
MAGEA4.10485.56	MAGEA4	4103	P43358	-0.790638	0.165069	0.64278
PSMD4.13568.30	PSMD4	5710	P55036	-0.30745	0.165439	0.643008
IL20RA.5085.18	IL20RA	53832	Q9UHF4	-0.118861	0.165495	0.643008
HS3ST5.10731.10	HS3ST5	222537	Q8IZT8	-0.199042	0.165521	0.643008
AP1S2.18405.117	AP1S2	8905	P56377	0.137219	0.165745	0.643008
CBL.12016.60	CBL	867	P22681	0.404805	0.165772	0.643008
SUSD1.9582.93	SUSD1	64420	Q6UWL2	-0.111819	0.166055	0.643367
IL17RC.5468.67	IL17RC	84818	Q8NAC3	0.308696	0.166265	0.643367
VWC2.15308.108	VWC2	375567	Q2TAL6	0.3831	0.1663	0.643367
GZMM.5704.74	GZMM	3004	P51124	0.157867	0.166379	0.643367
EIF5.2612.5	EIF5	1983	P55010	0.530503	0.166633	0.64385
CT55.9363.11	CT55	54967	Q8WUE5	0.220748	0.167104	0.645173
SLAMF1.7953.20	SLAMF1	6504	Q13291	0.411238	0.167558	0.646276
LRFN5.6587.6	LRFN5	145581	Q96NI6	-0.151148	0.167707	0.646276
PCSK2.6117.4	PCSK2	5126	P16519	0.294876	0.167812	0.646276
IL1R1.2991.9	IL1R1	3554	P14778	-0.435925	0.167908	0.646276
RSPO2.4566.24	RSPO2	340419	Q6UXX9	0.186402	0.168186	0.646398
BTC.13088.397	BTC	685	P35070	0.135956	0.168443	0.646398
BMP10.3587.53	BMP10	27302	O95393	0.261744	0.168534	0.646398
ENPP6.15579.26	ENPP6	133121	Q6UWR7	-0.121132	0.168612	0.646398
FAM3B.9177.6	FAM3B	54097	P58499	0.429972	0.168704	0.646398
PLG.3710.49	PLG	5340	P00747	-0.261745	0.168716	0.646398
PPM1L.7187.3	PPM1L	151742	Q5SGD2	0.172899	0.169175	0.647446
DCUN1D3.13553.4	DCUN1D3		Q8IWE4	-0.157654	0.169248	0.647446
PABPC4.12603.87	PABPC4		Q13310	0.267654	0.169763	0.648457
ADIPOQ.3554.24	ADIPOQ	9370	Q15848	0.511813	0.16989	0.648457
GRAMD1C.8842.16	GRAMD1C	54762	Q8IYS0	0.141544	0.169902	0.648457
CLINT1.11659.31	CLINT1	9685	Q14677	0.477057	0.170163	0.648958
SCARF2.8956.96	SCARF2	91179	Q96GP6	0.284733	0.170703	0.649889
RARRES1.8398.277	RARRES1	5918	P49788	0.384704	0.17076	0.649889
CFHR3.16836.1	CFHR3	10878	Q02985	0.0998174	0.170869	0.649889
LTA.4703.87	LTA	4049	P01374	0.159616	0.170955	0.649889
KLF4.17850.42	KLF4	9314	O43474	0.158761	0.171058	0.649889
TIMM21.9058.1	TIMM21	29090	Q9BVV7	-0.127068	0.17181	0.650884
LEFTY2.15503.15	LEFTY2	7044	O00292	0.354634	0.171811	0.650884
MICB.5102.55	MICB	4277	Q29980	-0.348442	0.171876	0.650884
TACSTD2.2619.72	TACSTD2	4070	P09758	0.114838	0.172067	0.650884
TMCO5A.6907.17	TMCO5A	145942	Q8N6Q1	-0.363752	0.172118	0.650884
MAP4K3.8978.30	MAP4K3	8491	Q8IVH8	-0.0854702	0.172154	0.650884
OLFM4.4769.10	OLFM4	10562	Q6UX06	0.217065	0.172232	0.650884
PILRA.8825.4	PILRA	29992	Q9UKJ1	0.171669	0.172766	0.651387
TNFSF15.2968.61	TNFSF15	9966	O95150	0.234779	0.172831	0.651387
GPR107.12963.1	GPR107	57720	Q5VW38	-0.098802	0.172879	0.651387
KARS.19249.18	KARS	3735	Q15046	0.434465	0.172886	0.651387
CCL8.13748.4	CCL8	6355	P80075	0.542696	0.173128	0.651493
SERPINA7.2706.69	SERPINA7	6906	P05543	-0.166859	0.173238	0.651493
OSM.2693.20	OSM	5008	P13725	-0.269823	0.173306	0.651493
PAK6.3827.22	PAK6	56924	Q9NQU5	0.619112	0.173599	0.652104
CLEC6A.6911.103	CLEC6A	93978	Q6EIG7	-0.214632	0.173881	0.652296
IL10RA.8104.21	IL10RA	3587	Q13651	-0.146831	0.174023	0.652296
UBE2V2.18165.181	UBE2V2	7336	Q15819	0.242892	0.174041	0.652296
ORAOV1.18195.3	ORAOV1	220064	Q8WV07	-0.433591	0.174701	0.654277
EFNB3.7785.1	EFNB3	1949	Q15768	-0.571546	0.175502	0.655608
SERPINA1.3580.25	SERPINA1	5265	P01009	-0.207861	0.17556	0.655608
CPNE1.5346.24	CPNE1	8904	Q99829	0.42198	0.175562	0.655608
SPACA3.8076.4	SPACA3	124912	Q8IXA5	0.34349	0.175581	0.655608
NCMAP.14614.41	NCMAP	400746	Q5T1S8	-0.326621	0.176155	0.655971
IGFL3.6961.14	IGFL3	388555	Q6UXB1	-0.252632	0.176205	0.655971
CPN1.7142.5	CPN1	1584	P15169	0.105658	0.176388	0.655971
RFXAP.12726.3	RFXAP		O00287	0.112569	0.1765	0.655971
CDH11.16305.10	CDH11	1009	P55287	-0.670453	0.176512	0.655971
TMEFF1.15641.20	TMEFF1	8577	Q8IYR6	0.178275	0.176639	0.655971
SPEF1.12876.39	SPEF1	25876	Q9Y4P9	-0.104754	0.176686	0.655971
DDT.19237.17	DDT	1652	P30046	0.186987	0.176729	0.655971
AGRP.2813.11	AGRP	181	O00253	0.417555	0.177082	0.656796
PGM1.9173.21	PGM1	5236	P36871	0.140183	0.177284	0.657056
NCALD.17816.58	NCALD	83988	P61601	0.16186	0.178005	0.658774
ALDOA.5864.10	ALDOA	226	P04075	0.324624	0.178011	0.658774
TCP1.19265.9	TCP1	6950	P17987	0.452344	0.178605	0.660481
GPR142.12766.33	GPR142		Q7Z601	-0.18017	0.178879	0.661007
CNPY4.15465.79	CNPY4	245812	Q8N129	0.32293	0.179119	0.661403
KIR2DL2.7773.20	KIR2DL2	3803	P43627	-0.295649	0.17946	0.662069
PNLIP.15613.16	PNLIP	5406	P16233	-0.493162	0.179696	0.662069
CYP3A4.7879.12	CYP3A4	1576	P08684	-0.112884	0.179697	0.662069
CREG1.9357.4	CREG1	8804	O75629	-0.239209	0.179934	0.662454
TMEM185A.14633.26	TMEM185A		Q8NFB2	-0.139794	0.180304	0.663112
CBX1.18817.50	CBX1	10951	P83916	0.455795	0.180378	0.663112
CXCL2.3148.49	CXCL2	2920	P19875	0.403579	0.18058	0.663365
SLCO5A1.11669.39	SLCO5A1		Q9H2Y9	-0.161152	0.180839	0.663428
TFIP11.9043.7	TFIP11	24144	Q9UBB9	-0.24655	0.181068	0.663428
LAT2.5613.75	LAT2	7462	Q9GZY6	0.150468	0.18109	0.663428
CCL3.3040.59	CCL3	6348	P10147	-0.196204	0.181315	0.663428
JPH1.6940.18	JPH1	56704	Q9HDC5	-0.109766	0.181392	0.663428
RAC3.16769.20	RAC3	5881	P60763	0.214646	0.181579	0.663428
TBK1.3400.49	TBK1	29110	Q9UHD2	0.214833	0.181652	0.663428
DEF6.14090.23	DEF6		Q9H4E7	0.292358	0.181738	0.663428
TRAPPC4.7007.24	TRAPPC4	51399	Q9Y296	0.121639	0.181792	0.663428
NTF3.4145.58	NTF3	4908	P20783	-0.202299	0.181925	0.663428
PBK.17475.18	PBK	55872	Q96KB5	0.27719	0.182651	0.664521
HS3ST3B1.6986.17	HS3ST3B1	9953	Q9Y662	-0.196882	0.182812	0.664521
MSR1.11207.3	MSR1	4481	P21757	-0.162285	0.182823	0.664521
GMPR2.19446.1	GMPR2	51292	Q9P2T1	0.230303	0.182972	0.664521
DUS2.13506.10	DUS2		Q9NX74	-0.179585	0.183153	0.664521
EEF2K.12332.7	EEF2K		O00418	0.410783	0.183282	0.664521
PCSK1N.9391.60	PCSK1N	27344	Q9UHG2	0.245978	0.183286	0.664521
KLB.19557.3	KLB	152831	Q86Z14	-0.436429	0.183288	0.664521
REG4.11102.22	REG4	83998	Q9BYZ8	0.442025	0.183684	0.665409
VAPA.7167.102	VAPA	9218	Q9P0L0	0.333469	0.183913	0.665409
ADM2.8100.15	ADM2	79924	Q7Z4H4	-0.364235	0.183985	0.665409
TP63.10040.63	TP63	8626	Q9H3D4	-0.160639	0.184087	0.665409
RND3.15439.21	RND3	390	P61587	-0.107816	0.184199	0.665409
WBP2.17698.15	WBP2	23558	Q969T9	0.48114	0.185098	0.667167
KIF1C.9899.28	KIF1C	10749	O43896	0.118912	0.185122	0.667167
SCGB3A1.6252.62	SCGB3A1	92304	Q96QR1	0.722946	0.185127	0.667167
TRA2B.12373.73	TRA2B	6434	P62995	0.391531	0.185314	0.667167
CD5L.3293.2	CD5L	922	O43866	0.490767	0.185569	0.667167
IGF1.8406.17	IGF1	3479	P05019	-0.185919	0.185797	0.667167
DDC.3538.26	DDC	1644	P20711	0.100537	0.185798	0.667167
SYN3.7199.3	SYN3	8224	O14994	-0.0834553	0.185911	0.667167
GSTZ1.16872.248	GSTZ1	2954	O43708	0.616473	0.186198	0.667167
CST5.3803.10	CST5	1473	P28325	0.494469	0.186203	0.667167
NIPAL4.12864.9	NIPAL4		Q0D2K0	-0.183717	0.186212	0.667167
CDON.4541.49	CDON	50937	Q4KMG0	-0.348832	0.186289	0.667167
ATP4B.9994.217	ATP4B	496	P51164	-0.234593	0.186441	0.667233
EPDR1.9040.144	EPDR1	54749	Q9UM22	0.166741	0.187277	0.668084
TFF1.9185.15	TFF1	7031	P04155	-0.563706	0.187291	0.668084
WFDC2.11388.75	WFDC2	10406	Q14508	0.356155	0.187655	0.668084
CSNK1D.11289.31	CSNK1D		P48730	0.136302	0.187691	0.668084
TRH.5659.11	TRH	7200	P20396	0.128514	0.187809	0.668084
DNAJC27.12799.65	DNAJC27		Q9NZQ0	-0.0926367	0.187887	0.668084
NEFL.10082.251	NEFL	4747	P07196	0.394424	0.187918	0.668084
ITGB6.7737.76	ITGB6	3694	P18564	-0.385984	0.18798	0.668084
MFAP5.6440.31	MFAP5	8076	Q13361	-0.396515	0.188047	0.668084
SRP19.18257.64	SRP19	6728	P09132	0.35131	0.18829	0.668084
FGR.3810.50	FGR	2268	P09769	0.459071	0.188336	0.668084
HBQ1.18198.51	HBQ1	3049	P09105	0.136414	0.188527	0.668084
RTP4.18315.38	RTP4	64108	Q96DX8	0.487395	0.188535	0.668084
ANKRD27.12445.50	ANKRD27	84079	Q96NW4	-0.0833269	0.188551	0.668084
IL22.2778.10	IL22	50616	Q9GZX6	0.378993	0.188713	0.668186
KAL1.6603.18	KAL1	3730	P23352	0.150995	0.189058	0.668689
FXN.15389.1	FXN	2395	Q16595	-0.154811	0.189275	0.668689
YES1.2878.66	YES1	7525	P07947	0.172341	0.189337	0.668689
PRC1.15310.61	PRC1	9055	O43663	0.169548	0.189586	0.668689
TP53I3.17748.21	TP53I3	9540	Q53FA7	0.325386	0.189609	0.668689
PPM1A.12619.14	PPM1A	5494	P35813	0.197491	0.190141	0.668689
HTATIP2.10630.5	HTATIP2	10553	Q9BUP3	-0.526075	0.190162	0.668689
ST6GALNAC5.7927.16	ST6GALNAC5	81849	Q9BVH7	-0.361824	0.190194	0.668689
LCN10.13007.66	LCN10	414332	Q6JVE6	-0.248457	0.190298	0.668689
UBL4A.11490.42	UBL4A		P11441	0.243757	0.190358	0.668689
UMODL1.9114.84	UMODL1	89766	Q5DID0	0.106447	0.190448	0.668689
CRISP2.9282.12	CRISP2	7180	P16562	0.289906	0.190461	0.668689
MNX1.9576.58	MNX1	3110	P50219	0.130967	0.19077	0.669213
HAMP.3504.58	HAMP	57817	P81172	0.610268	0.191022	0.669213
NPNT.6342.10	NPNT	255743	Q6UXI9	-0.292375	0.191089	0.669213
SERPINA4.3449.58	SERPINA4	5267	P29622	-0.294869	0.191223	0.669213
HAVCR2.11481.25	HAVCR2	84868	Q8TDQ0	-0.417756	0.19128	0.669213
DNAI1.11396.39	DNAI1		Q9UI46	-0.0774881	0.191745	0.670371
HSF2BP.19139.3	HSF2BP		O75031	-0.405411	0.191912	0.670483
RAB2A.16857.2	RAB2A	5862	P61019	0.329116	0.192112	0.670677
NLGN4X.5357.60	NLGN4X	57502	Q8N0W4	0.38149	0.192236	0.670677
IK.7207.4	IK	3550	Q13123	0.115156	0.192549	0.671182
HSF1.11616.9	HSF1	3297	Q00613	0.162838	0.192649	0.671182
DEFB119.8315.5	DEFB119	245932	Q8N690	-0.068488	0.192807	0.671263
TAC4.6468.37	TAC4	255061	Q86UU9	-0.0811309	0.193424	0.672625
ADPGK.6221.1	ADPGK	83440	Q9BRR6	0.171489	0.193467	0.672625
ADAMTSL2.6379.62	ADAMTSL2	9719	Q86TH1	0.277546	0.193729	0.673068
ZNF276.14692.3	ZNF276		Q8N554	-0.386099	0.193969	0.673432
GRP.5897.58	GRP	2922	P07492	-0.150771	0.194806	0.675868
PARK7.19545.145	PARK7		Q99497	-0.18672	0.195132	0.676529
BOLA2.8404.102	BOLA2	552900	Q9H3K6	0.33694	0.19543	0.677094
MLEC.6285.71	MLEC	9761	Q14165	0.375104	0.195627	0.67728
APTX.17736.105	APTX	54840	Q7Z2E3	-0.140492	0.195755	0.67728
PRCP.5722.78	PRCP	5547	P42785	-0.23759	0.196162	0.677762
GORAB.7247.1	GORAB	92344	Q5T7V8	0.082599	0.196451	0.677762
PLOD2.6923.1	PLOD2	5352	O00469	-0.291196	0.196527	0.677762
COL15A1.8974.172	COL15A1	1306	P39059	0.30055	0.196601	0.677762
FGF8.4394.71	FGF8	2253	P55075	0.173825	0.196694	0.677762
PSG11.7846.44	PSG11	5680	Q9UQ72	-0.205795	0.196826	0.677762
SERPINF1.9211.19	SERPINF1	5176	P36955	0.132645	0.196911	0.677762
G6PD.19297.4	G6PD	2539	P11413	0.530769	0.197118	0.677762
IRF6.9999.1	IRF6	3664	O14896	0.311665	0.197171	0.677762
G6B.8659.68	G6B	80739	O95866	-0.067695	0.197251	0.677762
PDPK1.4460.8	PDPK1	5170	O15530	0.320285	0.197829	0.678925
PAFAH2.18914.188	PAFAH2	5051	Q99487	0.150851	0.197861	0.678925
RGS4.17855.28	RGS4	5999	P49798	0.082309	0.198077	0.679028
USO1.13639.101	USO1	8615	O60763	0.242612	0.198294	0.679028
MTMR1.11167.6	MTMR1		Q13613	-0.107805	0.198299	0.679028
LRRC4C.9369.174	LRRC4C	57689	Q9HCJ2	-0.166725	0.198523	0.679131
TTC17.8800.14	TTC17	55761	Q96AE7	-0.187917	0.198601	0.679131
NOTCH3.5108.72	NOTCH3	4854	Q9UM47	0.210551	0.198939	0.679618
SNX7.14245.195	SNX7		Q9UNH6	-0.15778	0.199015	0.679618
CBFB.10048.7	CBFB	865	Q13951	0.164663	0.19949	0.680772
PNOC.15434.5	PNOC	5368	Q13519	0.146287	0.199646	0.680842
VNN2.15480.2	VNN2	8875	O95498	0.431369	0.199861	0.680859
AQP4.11363.58	AQP4	361	P55087	-0.404057	0.199924	0.680859
HDAC2.18897.31	HDAC2	3066	Q92769	0.28186	0.20046	0.681331
MLN.5631.83	MLN	4295	P12872	0.587151	0.20084	0.681331
SCUBE1.8989.40	SCUBE1	80274	Q8IWY4	0.679398	0.200852	0.681331
IFNA2.3497.13	IFNA2	3440	P01563	-0.078742	0.200931	0.681331
PRSS2.5034.79	PRSS2	5645	P07478	0.518472	0.201069	0.681331
NETO1.15298.199	NETO1	81832	Q8TDF5	0.342316	0.20109	0.681331
NAMPT.5011.11	NAMPT	10135	P43490	0.24545	0.201212	0.681331
DEPP.7178.59	DEPP	11067	Q9NTK1	-0.339336	0.201252	0.681331
MYCBP.19250.50	MYCBP	26292	Q99417	0.414264	0.20142	0.681331
GAA.9385.4	GAA	2548	P10253	-0.278873	0.201484	0.681331
ACBD6.10075.75	ACBD6	84320	Q9BR61	0.464297	0.201649	0.681331
PCOLCE2.6081.52	PCOLCE2	26577	Q9UKZ9	-0.209009	0.201699	0.681331
PROC.2961.1	PROC	5624	P04070	-0.214261	0.202038	0.682016
IRAK4.18162.167	IRAK4	51135	Q9NWZ3	0.227707	0.202341	0.682441
DPP4.15460.9	DPP4	1803	P27487	-0.108852	0.202446	0.682441
TAX1BP1.12721.4	TAX1BP1		Q86VP1	0.175407	0.202574	0.682441
DDX25.13984.23	DDX25		Q9UHL0	-0.145656	0.203583	0.685086
TNFRSF21.5404.53	TNFRSF21	27242	O75509	0.273424	0.203633	0.685086
GPC1.8697.38	GPC1	2817	P35052	-0.134095	0.203845	0.685232
AKR1B1.16606.85	AKR1B1	231	P15121	0.289101	0.204001	0.685232
S100A13.7223.60	S100A13	6284	Q99584	0.525842	0.204193	0.685232
KCTD5.12473.48	KCTD5	54442	Q9NXV2	0.0995047	0.204408	0.685232
PSMA7.12460.18	PSMA7	5688	O14818	0.298075	0.20446	0.685232
DSCAM.9175.48	DSCAM	1826	O60469	-0.103876	0.2045	0.685232
CCL1.2770.51	CCL1	6346	P22362	-0.276202	0.204736	0.685564
ASPRV1.10902.53	ASPRV1	151516	Q53RT3	0.197293	0.20489	0.685573
CARD18.18190.15	CARD18	59082	P57730	-0.221104	0.205319	0.685573
C2.3186.2	C2	717	P06681	0.213091	0.205421	0.685573
STAR.10085.25	STAR	6770	P49675	0.157714	0.205471	0.685573
B4GALT3.6921.24	B4GALT3	8703	O60512	0.133112	0.205595	0.685573
CLK2.11327.56	CLK2		P49760	-0.267563	0.205746	0.685573
TMPRSS6.11239.49	TMPRSS6		Q8IU80	-0.342626	0.205867	0.685573
B4GALNT1.8976.13	B4GALNT1	2583	Q00973	0.123318	0.205949	0.685573
PRDX6.5018.68	PRDX6	9588	P30041	0.301007	0.205974	0.685573
ITGAV.ITGB5.4917.62	ITGAV ITGB5	3685 3693	P06756, P18084	-0.248138	0.206152	0.68571
SSB.13526.5	SSB	6741	P05455	0.134989	0.206437	0.6862
ARFGAP2.11664.32	ARFGAP2	84364	Q8N6H7	0.437816	0.207452	0.689114
VDR.10023.32	VDR	7421	P11473	-0.149719	0.207776	0.689732
MAPK13.5006.71	MAPK13	5603	O15264	0.206982	0.208157	0.690539
UNC5D.16307.22	UNC5D	137970	Q6UXZ4	0.329633	0.208791	0.691216
PTPN13.12664.19	PTPN13	5783	Q12923	0.145466	0.208989	0.691216
LAIR2.7130.4	LAIR2	3904	Q6ISS4	-0.151081	0.209085	0.691216
NAALADL1.17505.125	NAALADL1		Q9UQQ1	-0.175487	0.209149	0.691216
FGF9.19584.33	FGF9	2254	P31371	-0.155961	0.209379	0.691216
CD226.5062.60	CD226	10666	Q15762	0.159001	0.209418	0.691216
TNNI2.5440.26	TNNI2	7136	P48788	0.548549	0.209621	0.691216
TRIO.11126.102	TRIO	7204	O75962	-0.143168	0.209665	0.691216
CLGN.10600.24	CLGN	4312	O14967	-0.318987	0.209708	0.691216
STIM1.8916.32	STIM1	6786	Q13586	0.370099	0.209762	0.691216
PDK1.5227.60	PDK1	5163	Q15118	-0.322147	0.209883	0.691216
RPS6KA3.3469.74	RPS6KA3	6197	P51812	0.305876	0.210124	0.691556
TIRAP.9839.148	TIRAP	114609	P58753	0.289393	0.2104	0.691709
IL4R.3055.54	IL4R	3566	P24394	-0.147014	0.210782	0.691709
KIR2DL4.5095.21	KIR2DL4	3805	Q99706	0.184082	0.210862	0.691709
KDSR.19483.16	KDSR	2531	Q06136	-0.143004	0.210945	0.691709
PCSK1.13388.57	PCSK1	5122	P29120	0.188075	0.211382	0.691709
HEXIM1.15596.7	HEXIM1		O94992	0.336246	0.211435	0.691709
SMS.18179.56	SMS	6611	P52788	0.082216	0.211513	0.691709
PSME1.5918.5	PSME1	5720	Q06323	0.246608	0.211551	0.691709
RNF41.13411.21	RNF41		Q9H4P4	0.106873	0.211679	0.691709
TNFSF12.5939.42	TNFSF12	8742	O43508	0.416947	0.211793	0.691709
VAV1.5275.28	VAV1	7409	P15498	0.367722	0.211845	0.691709
BMP15.11129.66	BMP15	9210	O95972	-0.169462	0.212141	0.691709
RECQL.11431.235	RECQL		P46063	0.321669	0.212259	0.691709
P4HA1.11645.9	P4HA1	5033	P13674	0.123247	0.212451	0.691709
CST6.14711.27	CST6	1474	Q15828	0.349205	0.212599	0.691709
CHST1.7803.4	CHST1	8534	O43916	0.264726	0.212727	0.691709
CAV3.8690.25	CAV3	859	P56539	0.188318	0.212856	0.691709
TMPRSS15.3189.61	TMPRSS15	5651	P98073	0.216663	0.213041	0.691709
MYL7.19296.51	MYL7	58498	Q01449	-0.201936	0.213207	0.691709
NXT1.9942.2	NXT1	29107	Q9UKK6	0.285342	0.213675	0.691709
GDI2.2647.66	GDI2	2665	P50395	0.304325	0.213734	0.691709
CYCS.2942.50	CYCS	54205	P99999	-0.208865	0.214018	0.691709
MICALL2.12891.1	MICALL2		Q8IY33	-0.130469	0.214034	0.691709
RBP1.19279.42	RBP1	5947	P09455	0.242694	0.214191	0.691709
RBM46.13958.5	RBM46		Q8TBY0	-0.123477	0.214216	0.691709
ECH1.12662.82	ECH1	1891	Q13011	-0.255647	0.214292	0.691709
SEZ6L.19563.3	SEZ6L	23544	Q9BYH1	0.232905	0.214329	0.691709
CD9.17449.23	CD9	928	P21926	0.178539	0.214394	0.691709
MAZ.13436.54	MAZ		P56270	0.164296	0.21462	0.691709
HS3ST1.15497.9	HS3ST1	9957	O14792	-0.264754	0.214919	0.691709
PRKCI.3379.29	PRKCI	5584	P41743	0.244169	0.21532	0.691709
ZG16B.8310.6	ZG16B	124220	Q96DA0	0.309456	0.21536	0.691709
PLCB1.11354.21	PLCB1	23236	Q9NQ66	-0.317331	0.215361	0.691709
LGALS3.3066.12	LGALS3	3958	P17931	0.265725	0.215373	0.691709
APRT.10088.37	APRT	353	P07741	0.53383	0.215523	0.691709
SDSL.17777.31	SDSL	113675	Q96GA7	0.237546	0.215672	0.691709
LDLRAD4.9004.24	LDLRAD4	753	O15165	0.315557	0.21588	0.691709
GDF3.16755.195	GDF3	9573	Q9NR23	0.139003	0.216162	0.691709
IGHG1.IGHG2.IGHG3.IGHG4.IGK.IGL.2744.57	IGHG1 IGHG2 IGHG3 IGHG4 IGK@ IGL@	3500 3501 3502 3503 50802 3535	P01857	-0.12668	0.216199	0.691709
FN1.3435.53	FN1	2335	P02751	0.389122	0.216245	0.691709
CENPW.8864.59	CENPW	387103	Q5EE01	-0.249519	0.216315	0.691709
ST6GALNAC3.10705.14	ST6GALNAC3	256435	Q8NDV1	0.188951	0.216397	0.691709
THTPA.13595.20	THTPA		Q9BU02	-0.195139	0.216488	0.691709
PDZD11.6219.14	PDZD11	51248	Q5EBL8	0.0929406	0.216533	0.691709
ISL1.11549.6	ISL1	3670	P61371	-0.109477	0.216565	0.691709
CRABP1.11967.23	CRABP1	1381	P29762	-0.103693	0.216618	0.691709
C1GALT1C1.5735.54	C1GALT1C1	29071	Q96EU7	-0.203527	0.216749	0.691709
MMEL1.3627.71	MMEL1	79258	Q495T6	-0.550859	0.216817	0.691709
SRXN1.14268.4	SRXN1	140809	Q9BYN0	-0.201739	0.217114	0.691995
NCR3LG1.7854.38	NCR3LG1	374383	Q68D85	-0.0896863	0.217308	0.691995
SERPINA6.4785.30	SERPINA6	866	P08185	0.0961325	0.217495	0.691995
LRP4.19558.10	LRP4	4038	O75096	0.197648	0.217616	0.691995
ART3.7970.315	ART3	419	Q13508	0.34903	0.217764	0.691995
C11orf73.8686.342	C11orf73	51501	Q53FT3	0.120972	0.217814	0.691995
ANK2.7624.19	ANK2	287	Q01484	-0.24309	0.218219	0.691995
SMIM10.9379.248	SMIM10	644538	Q96HG1	-0.232236	0.21827	0.691995
OPCML.15622.13	OPCML	4978	Q14982	-0.25668	0.21837	0.691995
MMP16.9719.145	MMP16	4325	P51512	-0.231519	0.218512	0.691995
GRN.4992.49	GRN	2896	P28799	0.212345	0.218514	0.691995
ACRV1.15301.24	ACRV1	56	P26436	-0.0936423	0.218665	0.691995
PLA2G5.2449.1	PLA2G5	5322	P39877	0.191551	0.218969	0.691995
RBL2.13565.2	RBL2	5934	Q08999	0.335464	0.218971	0.691995
MYBPC1.7648.9	MYBPC1	4604	Q00872	0.259099	0.219107	0.691995
GLP1R.13085.18	GLP1R	2740	P43220	0.108144	0.219123	0.691995
MANBA.6382.17	MANBA	4126	O00462	-0.215321	0.219535	0.692797
PRSS37.5653.23	PRSS37	136242	A4D1T9	-0.0844819	0.219654	0.692797
CCL28.2890.59	CCL28	56477	Q9NRJ3	0.480691	0.220113	0.693451
KIAA1549L.11145.72	KIAA1549L		Q6ZVL6	-0.137018	0.220139	0.693451
C18orf32.8236.8	C18orf32	497661	Q8TCD1	-0.133375	0.220374	0.693754
GPT.16015.19	GPT	2875	P24298	-0.419247	0.220705	0.693946
PFN2.16923.20	PFN2	5217	P35080	0.357587	0.220736	0.693946
NAPA.4292.5	NAPA	8775	P54920	0.356744	0.221305	0.693946
SMTN.12546.1	SMTN	6525	P53814	0.337531	0.221322	0.693946
PLA2G2D.16298.84	PLA2G2D	26279	Q9UNK4	-0.104351	0.221362	0.693946
SEMA6C.7202.107	SEMA6C	10500	Q9H3T2	0.229395	0.221409	0.693946
SLIT3.18931.40	SLIT3	6586	O75094	-0.331164	0.221415	0.693946
JTB.9038.12	JTB	10899	O76095	0.220379	0.221546	0.693946
IL27.EBI3.2829.19	IL27 EBI3	246778 10148	Q8NEV9 Q14213	0.125346	0.222116	0.694768
KIR2DS2.10428.1	KIR2DS2	100132285	P43631	0.438285	0.222224	0.694768
STARD5.17383.4	STARD5		Q9NSY2	0.283689	0.222429	0.694768
TBC1D5.9960.2	TBC1D5	9779	Q92609	0.295682	0.222486	0.694768
C5.2851.63	C5	727	P01031	0.289817	0.222504	0.694768
CRIP2.9053.16	CRIP2	1397	P52943	0.192932	0.222829	0.695273
PEX5.5915.58	PEX5	5830	P50542	0.36291	0.223092	0.695273
GBP6.7818.101	GBP6	163351	Q6ZN66	-0.157212	0.223127	0.695273
SLITRK6.16916.19	SLITRK6		Q9H5Y7	0.168461	0.223226	0.695273
PPAPDC1A.13548.53	PPAPDC1A		Q5VZY2	-0.203367	0.223568	0.695273
ST3GAL1.5657.28	ST3GAL1	6482	Q11201	-0.167512	0.223615	0.695273
BRD1.11607.15	BRD1	23774	O95696	0.103135	0.22364	0.695273
SULT1E1.16932.5	SULT1E1	6783	P49888	-0.159729	0.223799	0.695336
CLIC2.17837.5	CLIC2	1193	O15247	0.350696	0.224226	0.69623
ADGRE2.4546.27	ADGRE2	30817	Q9UHX3	0.295059	0.224443	0.69647
TNC.5675.6	TNC	3371	P24821	0.332979	0.22494	0.697025
CDK2AP1.9450.18	CDK2AP1	8099	O14519	-0.0845799	0.224998	0.697025
HECW1.12669.30	HECW1		Q76N89	-0.0938516	0.22504	0.697025
IRF4.19564.61	IRF4	3662	Q15306	0.192109	0.225241	0.697213
TIAL1.19131.184	TIAL1	7073	Q01085	0.308713	0.225392	0.697248
MESDC2.15299.102	MESDC2	23184	Q14696	0.370855	0.226016	0.697533
SIRT2.5030.52	SIRT2	22933	Q8IXJ6	-0.270296	0.226104	0.697533
LRFN1.7910.41	LRFN1	57622	Q9P244	-0.108747	0.226243	0.697533
LAMA2.LAMB1.LAMC1.18347.15	LAMA2 LAMB1 LAMC1		P24043 P07942 P11047	0.243508	0.226338	0.697533
LCK.4560.34	LCK	3932	P06239	0.209725	0.226398	0.697533
NUP210L.9606.4	NUP210L	91181	Q5VU65	0.31378	0.226511	0.697533
C2orf66.5677.15	C2orf66	401027	Q6UXQ4	-0.117324	0.226717	0.697533
METAP2.3170.6	METAP2	10988	P50579	0.264552	0.226756	0.697533
SIGLEC9.3007.7	SIGLEC9	27180	Q9Y336	-1.04924	0.226798	0.697533
FDX1L.11231.12	FDX1L	112812	Q6P4F2	-0.292688	0.22688	0.697533
CCL3L1.2783.18	CCL3L1	414062	P16619	-0.14473	0.227175	0.69801
RNASE3.15576.158	RNASE3	6037	P12724	0.40016	0.227505	0.698596
VRK1.12553.5	VRK1	7443	Q99986	0.198875	0.228029	0.699542
SLC6A9.11653.69	SLC6A9		P48067	-0.131117	0.22813	0.699542
NAAA.3173.49	NAAA	27163	Q02083	-0.348797	0.228233	0.699542
FKBP6.12529.32	FKBP6		O75344	-0.15052	0.228661	0.69976
RGS3.12827.37	RGS3	5998	P49796	-0.121987	0.228667	0.69976
MAPKAPK3.3822.54	MAPKAPK3	7867	Q16644	0.401015	0.22882	0.69976
SMAP1.11649.3	SMAP1		Q8IYB5	0.407015	0.228865	0.69976
GCLM.18214.2	GCLM	2730	P48507	0.336536	0.229106	0.700068
IGSF8.6984.6	IGSF8	93185	Q969P0	0.178279	0.230326	0.702908
PIANP.9599.6	PIANP	196500	Q8IYJ0	0.353661	0.230392	0.702908
CFD.2946.52	CFD	1675	P00746	0.2135	0.230552	0.702908
NPTX2.6521.35	NPTX2	4885	P47972	0.183728	0.230913	0.702908
MAGEA5.18192.69	MAGEA5	4104	P43359	-0.257935	0.230931	0.702908
RAD51L3.12554.10	RAD51L3	5892	O75771	0.28822	0.231066	0.702908
LYPLAL1.12428.2	LYPLAL1	127018	Q5VWZ2	-0.103218	0.231109	0.702908
ADAM9.3795.6	ADAM9	8754	Q13443	-0.296472	0.231418	0.702908
EIF4B.14675.20	EIF4B	1975	P23588	0.283364	0.23145	0.702908
PCDHB2.10748.216	PCDHB2	56133	Q9Y5E7	-0.181546	0.231515	0.702908
NGF.5801.72	NGF	4803	P01138	-0.273415	0.231639	0.702908
MAFG.19281.86	MAFG	4097	O15525	0.300732	0.231723	0.702908
ERCC1.12585.39	ERCC1	2067	P07992	-0.17009	0.232473	0.703335
PSMA1.7880.9	PSMA1	5682	P25786	-0.116552	0.232605	0.703335
MMP1.4924.32	MMP1	4312	P03956	0.463519	0.232767	0.703335
PNP.15435.4	PNP	4860	P00491	0.354198	0.232865	0.703335
SCO1.7853.19	SCO1	6341	O75880	-0.100737	0.232901	0.703335
CALCOCO2.12534.10	CALCOCO2		Q13137	0.166877	0.232984	0.703335
NRSN1.11654.77	NRSN1		Q8IZ57	-0.275538	0.233259	0.703335
OCIAD1.16802.31	OCIAD1	54940	Q9NX40	-0.125623	0.233373	0.703335
EIF3J.13497.34	EIF3J		O75822	0.250382	0.233435	0.703335
PTH.5954.62	PTH	5741	P01270	0.385493	0.233752	0.703335
IL20.4138.25	IL20	50604	Q9NYY1	0.155015	0.233801	0.703335
TPM2.4472.5	TPM2	7169	P07951	-0.354664	0.234137	0.703335
TG.18839.24	TG	7038	P01266	0.564457	0.234248	0.703335
TEX29.10557.6	TEX29	121793	Q8N6K0	0.21454	0.234298	0.703335
FGF12.4392.54	FGF12	2257	P61328	0.21204	0.234355	0.703335
SLC14A2.12818.159	SLC14A2		Q15849	0.317321	0.234364	0.703335
IGHE.IGK.IGL.4135.84	IGHE IGK@ IGL@	3497 50802 3535	P01854	0.928939	0.234769	0.703335
RAB14.14283.12	RAB14	51552	P61106	0.302877	0.234894	0.703335
PEAR1.8275.31	PEAR1	375033	Q5VY43	0.182755	0.234984	0.703335
TNFSF14.5355.69	TNFSF14	8740	O43557	0.197202	0.235025	0.703335
HOMER2.12685.57	HOMER2		Q9NSB8	0.323686	0.235197	0.703335
PDCD6IP.18174.79	PDCD6IP	10015	Q8WUM4	0.311067	0.235214	0.703335
LSM1.17795.176	LSM1	27257	O15116	-0.269843	0.235331	0.703335
MMP3.2788.55	MMP3	4314	P08254	-0.121131	0.235335	0.703335
APOM.10445.20	APOM	55937	O95445	-0.22571	0.235383	0.703335
CBLN4.5688.65	CBLN4	140689	Q9NTU7	-0.248209	0.235729	0.703946
MSH2.9739.4	MSH2	4436	P43246	-0.165362	0.236476	0.704739
PLA2G10.2949.6	PLA2G10	8399	O15496	0.205788	0.236731	0.704739
IL1RAP.14048.7	IL1RAP	3556	Q9NPH3	0.208181	0.236871	0.704739
SLC30A3.9081.39	SLC30A3	7781	Q99726	-0.199985	0.237249	0.704739
CCL27.2192.63	CCL27	10850	Q9Y4X3	0.16983	0.237382	0.704739
ETFA.17435.43	ETFA	2108	P13804	-0.195307	0.237464	0.704739
ZNF264.9993.11	ZNF264	9422	O43296	0.194617	0.237532	0.704739
NRAS.10531.18	NRAS	4893	P01111	0.233777	0.237781	0.704739
EIF4E.19263.147	EIF4E	1977	P06730	0.222157	0.237825	0.704739
ANGPTL7.6371.50	ANGPTL7	10218	O43827	0.372359	0.238016	0.704739
STK17B.8399.6	STK17B	9262	O94768	0.114479	0.238082	0.704739
CFTR.7717.95	CFTR	1080	P13569	-0.387209	0.238222	0.704739
FLRT3.13123.3	FLRT3	23767	Q9NZU0	-0.30395	0.238312	0.704739
CFHR2.15584.9	CFHR2	3080	P36980	0.407334	0.238354	0.704739
TDO2.9880.33	TDO2	6999	P48775	-0.282036	0.238488	0.704739
LRP1.9182.3	LRP1	4035	Q07954	-0.149874	0.238502	0.704739
MGAT4C.7208.60	MGAT4C	25834	Q9UBM8	0.371465	0.238618	0.704739
DBNL.4978.54	DBNL	28988	Q9UJU6	0.206343	0.238756	0.704739
SORBS3.12976.49	SORBS3	10174	O60504	0.215638	0.238777	0.704739
STK17B.5249.31	STK17B	9262	O94768	0.317911	0.238816	0.704739
GAPDH.3848.14	GAPDH	2597	P04406	0.393903	0.239259	0.705292
FST.4132.27	FST	10468	P19883	0.225437	0.239347	0.705292
FKBP4.17722.5	FKBP4	2288	Q02790	0.214647	0.23964	0.705292
LAP3.13959.7	LAP3	51056	P28838	0.388812	0.239676	0.705292
GULP1.19180.38	GULP1	51454	Q9UBP9	-0.190587	0.239972	0.705292
HEBP1.18225.13	HEBP1	50865	Q9NRV9	0.307586	0.240005	0.705292
SYT7.7121.2	SYT7	9066	O43581	-0.0758668	0.240116	0.705292
TPM4.9863.1	TPM4	7171	P67936	-0.301032	0.240401	0.705292
TNFRSF4.3730.81	TNFRSF4	7293	P43489	0.120702	0.240418	0.705292
PACSIN3.14674.63	PACSIN3		Q9UKS6	-0.137943	0.240721	0.705292
MAGEA8.18326.50	MAGEA8	4107	P43361	-0.21915	0.241047	0.705292
CPA2.9276.7	CPA2	1358	P48052	-0.137339	0.241433	0.705292
CCNA2.15574.37	CCNA2	890	P20248	0.174929	0.241438	0.705292
CSF2.4697.59	CSF2	1437	P04141	-0.240084	0.241502	0.705292
ST8SIA3.6929.10	ST8SIA3	51046	O43173	-0.216112	0.241567	0.705292
PET117.19303.64	PET117	100303755	Q6UWS5	-0.326055	0.241579	0.705292
CLEC12A.11187.11	CLEC12A		Q5QGZ9	0.507643	0.241609	0.705292
ICAM3.2649.77	ICAM3	3385	P32942	0.245086	0.24168	0.705292
STC1.4930.21	STC1	6781	P52823	0.33013	0.241685	0.705292
PDHX.18319.7	PDHX	8050	O00330	0.353802	0.241978	0.705734
CRIPT.19294.26	CRIPT	9419	Q9P021	0.180638	0.24286	0.707603
BRD2.15372.43	BRD2	6046	P25440	0.171097	0.243144	0.707603
TSLP.3010.53	TSLP	85480	Q969D9	0.125502	0.243161	0.707603
TF.4162.54	TF	7018	P02787	-0.111024	0.243289	0.707603
CBS.10086.39	CBS	875	P35520	-0.298869	0.243327	0.707603
TMEM106B.8687.26	TMEM106B	54664	Q9NUM4	-0.0819973	0.243531	0.707662
LARGE.7935.26	LARGE	9215	O95461	0.50754	0.243689	0.707662
NTRK2.4866.59	NTRK2	4915	Q16620	-0.316939	0.243772	0.707662
PPP2R1A.12621.55	PPP2R1A	5518	P30153	-0.24664	0.244288	0.708746
SRI.12356.65	SRI	6717	P30626	0.23519	0.244772	0.709738
RAB2B.19253.82	RAB2B	84932	Q8WUD1	0.14638	0.245005	0.709778
NPTX1.9256.78	NPTX1	4884	Q15818	-0.214856	0.24507	0.709778
CRYBB2.10000.28	CRYBB2	1415	P43320	-0.251371	0.245289	0.709893
DTYMK.19504.22	DTYMK	1841	P23919	0.324112	0.245444	0.709893
IAPP.19639.53	IAPP	3375	P10997	-0.30697	0.245536	0.709893
ZHX1.12751.26	ZHX1	11244	Q9UKY1	-0.117002	0.246076	0.711044
STOML1.17344.23	STOML1		Q9UBI4	0.426992	0.246421	0.711629
SEPW1.18310.26	SEPW1	6415	P63302	0.403563	0.246665	0.711723
AKR1B10.16081.38	AKR1B10	57016	O60218	-0.374665	0.246738	0.711723
RCL.17785.11	RCL	10591	O43598	0.181082	0.246935	0.711881
POR.2731.29	POR	5447	P16435	-0.336782	0.247218	0.711925
PEF1.19272.9	PEF1	553115	Q9UBV8	-0.192221	0.247329	0.711925
MYCT1.13541.1	MYCT1	80177	Q8N699	0.134582	0.247378	0.711925
SEMA3A.3222.11	SEMA3A	10371	Q14563	0.141018	0.247586	0.712114
NMU.8754.5	NMU	10874	P48645	0.0875182	0.248141	0.712485
HEXB.15470.11	HEXB	3074	P07686	-0.304961	0.248279	0.712485
ISLR2.13124.20	ISLR2	57611	Q6UXK2	-0.200819	0.248345	0.712485
BMP4.6326.20	BMP4	652	P12644	0.18004	0.248433	0.712485
NHLRC3.9087.8	NHLRC3	387921	Q5JS37	0.298973	0.248505	0.712485
IL5.11071.1	IL5	3567	P05113	-0.164302	0.248689	0.712485
PPID.5202.4	PPID	5481	Q08752	0.561454	0.248714	0.712485
GPR101.11371.1	GPR101		Q96P66	-0.537934	0.249231	0.712611
ROR1.2590.69	ROR1	4919	Q01973	0.325741	0.249232	0.712611
SAYSD1.6594.64	SAYSD1	55776	Q9NPB0	-0.0840293	0.24946	0.712611
DVL2.13575.40	DVL2		O14641	-0.185909	0.249765	0.712611
CCL23.2913.1	CCL23	6368	P55773	0.269029	0.249906	0.712611
SBDS.3866.7	SBDS	51119	Q9Y3A5	0.236858	0.250123	0.712611
FARS2.13941.82	FARS2		O95363	0.242138	0.250193	0.712611
CNTFR.14101.2	CNTFR	1271	P26992	0.236133	0.250432	0.712611
OTUD5.12480.9	OTUD5		Q96G74	-0.171455	0.250472	0.712611
TPO.3873.51	TPO	7173	P07202	0.20765	0.250496	0.712611
RPRD1B.19126.4	RPRD1B	58490	Q9NQG5	0.124347	0.250513	0.712611
CXCL8.3447.64	CXCL8	3576	P10145	0.315585	0.250543	0.712611
ARFIP1.13488.3	ARFIP1	27236	P53367	0.311191	0.250612	0.712611
RYK.5583.62	RYK	6259	P34925	-0.136643	0.250805	0.712731
ADCYAP1.8285.64	ADCYAP1	116	P18509	-0.0971034	0.251086	0.712731
TMEM132D.13416.8	TMEM132D		Q14C87	-0.281667	0.251181	0.712731
MACROD1.13653.335	MACROD1		Q9BQ69	0.240003	0.251365	0.712731
SEPT6.17693.2	2020-09-06	23157	Q14141	0.114041	0.251368	0.712731
TLR4.LY96.3647.49	TLR4 LY96	7099 23643	O00206 Q9Y6Y9	-0.16315	0.251575	0.712915
SMYD2.12636.113	SMYD2		Q9NRG4	-0.117206	0.252235	0.71438
TACSTD2.14034.22	TACSTD2	4070	P09758	-0.0760604	0.252428	0.714521
NDRG3.18312.68	NDRG3	57446	Q9UGV2	0.25751	0.252782	0.715118
SLAMF7.5487.7	SLAMF7	57823	Q9NQ25	-0.271243	0.253026	0.715231
S100A4.14116.129	S100A4	6275	P26447	0.244206	0.253193	0.715231
ST3GAL2.6281.51	ST3GAL2	6483	Q16842	0.389045	0.253251	0.715231
PDGFD.9341.1	PDGFD	80310	Q9GZP0	0.236308	0.25352	0.715276
HRK.8008.28	HRK	8739	O00198	0.153744	0.253554	0.715276
MGAT1.10571.14	MGAT1	4245	P26572	-0.17322	0.253842	0.715329
VTA1.4209.60	VTA1	51534	Q9NP79	0.360732	0.253859	0.715329
MARK3.9747.48	MARK3	4140	P27448	0.186053	0.254166	0.715364
PLBD2.6536.54	PLBD2	196463	Q8NHP8	0.0912466	0.254195	0.715364
LYPD1.9327.3	LYPD1	116372	Q8N2G4	0.0825964	0.254385	0.715364
PDCD4.17202.37	PDCD4	27250	Q53EL6	-0.0991468	0.254444	0.715364
JARID2.12623.84	JARID2		Q92833	-0.121208	0.254768	0.715524
NPPB.3723.1	NPPB	4879	P16860	0.0893138	0.25512	0.715524
KCNE5.8908.14	KCNE5	23630	Q9UJ90	0.174357	0.255439	0.715524
KPNA2.2860.19	KPNA2	3838	P52292	0.257159	0.255532	0.715524
PPFIA1.13975.56	PPFIA1		Q13136	0.322565	0.255557	0.715524
ENG.4908.6	ENG	2022	P17813	-0.296846	0.255796	0.715524
FKBP2.9339.204	FKBP2	2286	P26885	0.227476	0.255894	0.715524
CDKN1B.3719.2	CDKN1B	1027	P46527	0.185672	0.256018	0.715524
CCBL1.17365.7	CCBL1	883	Q16773	0.133805	0.256067	0.715524
AGO3.15323.112	AGO3	192669	Q9H9G7	0.310312	0.256078	0.715524
SPSB1.13942.140	SPSB1		Q96BD6	0.12269	0.256111	0.715524
STAT1.10370.21	STAT1	6772	P42224	0.474858	0.256219	0.715524
SDF2.15333.11	SDF2	6388	Q99470	0.338882	0.256556	0.716062
TEK.3773.15	TEK	7010	Q02763	-0.162152	0.256795	0.7162
INHBA.13738.8	INHBA	3624	P08476	0.326598	0.256892	0.7162
CTRB1.5671.1	CTRB1	1504	P17538	-0.441854	0.257545	0.716864
MPP6.13490.1	MPP6		Q9NZW5	0.148593	0.257584	0.716864
PPP2R5A.13622.16	PPP2R5A	5525	Q15172	0.326827	0.257657	0.716864
CAMK2A.3350.53	CAMK2A	815	Q9UQM7	0.165258	0.257704	0.716864
DPEP2.8327.26	DPEP2	64174	Q9H4A9	-0.14846	0.257853	0.716881
ATP5J2.11539.4	ATP5J2	9551	P56134	-0.167199	0.258256	0.717291
ARAF.12583.77	ARAF	369	P10398	0.173675	0.258545	0.717291
USP15.19161.1	USP15	9958	Q9Y4E8	0.218529	0.258641	0.717291
RAB5B.19222.124	RAB5B	5869	P61020	0.280709	0.259069	0.717291
RBKS.19467.3	RBKS	64080	Q9H477	0.139586	0.259203	0.717291
WNK3.5493.17	WNK3	65267	Q9BYP7	0.239426	0.259314	0.717291
FLT1.8231.122	FLT1	2321	P17948	-0.372719	0.259527	0.717291
GRID2.12758.47	GRID2		O43424	-0.262974	0.259596	0.717291
PRSS8.15513.108	PRSS8	5652	Q16651	0.145277	0.259886	0.717291
HK3.19518.12	HK3	3101	P52790	0.132754	0.260062	0.717291
EPHA1.3431.54	EPHA1	2041	P21709	-0.357502	0.260212	0.717291
CD7.12008.3	CD7	924	P09564	0.29164	0.260236	0.717291
SERPINA10.13119.26	SERPINA10	51156	Q9UK55	-0.208075	0.260285	0.717291
C8G.14708.59	C8G	733	P07360	-0.150315	0.26042	0.717291
CTSO.9264.11	CTSO	1513	P43234	-0.267193	0.260439	0.717291
MMP7.2789.26	MMP7	4316	P09237	-0.496219	0.260456	0.717291
IGFBP1.2771.35	IGFBP1	3484	P08833	0.43714	0.260601	0.717291
ABL2.3342.76	ABL2	27	P42684	0.171414	0.260864	0.717291
PAK7.3388.58	PAK7	57144	Q9P286	0.13277	0.26092	0.717291
SNX8.6925.26	SNX8	29886	Q9Y5X2	0.339478	0.26105	0.717291
DSG2.9484.75	DSG2	1829	Q14126	0.230611	0.261054	0.717291
SORCS3.15637.38	SORCS3	22986	Q9UPU3	-0.116382	0.261163	0.717291
LAP3.15610.72	LAP3	51056	P28838	0.434498	0.261351	0.717291
NT5C3L.19135.5	NT5C3L	115024	Q969T7	0.150141	0.261446	0.717291
BST1.4535.50	BST1	683	Q10588	-0.29521	0.261659	0.717481
PGD.4187.49	PGD	5226	P52209	0.535423	0.262076	0.717904
CUL1.17797.1	CUL1	8454	Q13616	0.196274	0.262178	0.717904
RAB21.17514.48	RAB21	23011	Q9UL25	0.318058	0.262245	0.717904
GSK3A.3441.64	GSK3A	2931	P49840	0.310551	0.262449	0.718069
OBP2A.6526.77	OBP2A	29991	Q9NY56	0.207343	0.262855	0.718788
CRISPLD2.5691.2	CRISPLD2	83716	Q9H0B8	0.397284	0.263264	0.718814
CALB2.16803.4	CALB2	794	P22676	0.218793	0.263334	0.718814
FAM69C.14341.8	FAM69C		Q0P6D2	-0.10239	0.263405	0.718814
SULT2B1.17209.27	SULT2B1	6820	O00204	0.259444	0.263455	0.718814
ADH1A.17396.23	ADH1A	124	P07327	-0.444659	0.263584	0.718814
CLPS.5749.53	CLPS	1208	P04118	0.307577	0.264049	0.719445
BLVRA.11382.5	BLVRA	644	P53004	0.322469	0.264106	0.719445
GTF2I.13609.11	GTF2I	2969	P78347	0.0929802	0.264248	0.719445
ELK1.10006.25	ELK1	2002	P19419	0.1096	0.264526	0.719811
PKD2.13745.10	PKD2		Q13563	0.136166	0.26477	0.719885
CTNNB1.9842.2	CTNNB1	1499	P35222	-0.284106	0.264841	0.719885
VAMP8.7064.2	VAMP8	8673	Q9BV40	-0.194559	0.265024	0.719973
PTGFRN.12727.7	PTGFRN		Q9P2B2	-0.184924	0.265162	0.719973
RGS7.12538.19	RGS7		P49802	-0.178371	0.265498	0.72019
GOLM1.8983.7	GOLM1	51280	Q8NBJ4	0.344433	0.26553	0.72019
CGA.FSHB.3032.11	CGA FSHB	1081 2488	P01215, P01225	-0.554359	0.265837	0.720319
ADAM19.8948.13	ADAM19	8728	Q9H013	-0.180753	0.2661	0.720319
FKBP7.9288.7	FKBP7	51661	Q9Y680	0.239334	0.266396	0.720319
ROS1.9032.30	ROS1	6098	P08922	-0.118138	0.266431	0.720319
NETO1.5639.49	NETO1	81832	Q8TDF5	0.213004	0.266519	0.720319
RAB27B.13596.3	RAB27B	5874	O00194	-0.0970922	0.266703	0.720319
SLAMF8.8994.65	SLAMF8	56833	Q9P0V8	0.402222	0.266705	0.720319
RNF146.11401.181	RNF146		Q9NTX7	0.083172	0.266936	0.720319
SFRP4.17447.52	SFRP4	6424	Q6FHJ7	0.300584	0.266941	0.720319
PPIB.4718.5	PPIB	5479	P23284	0.161481	0.26702	0.720319
CGA.14056.4	CGA	1081	P01215	0.106398	0.267746	0.721808
MRPL32.7982.10	MRPL32	64928	Q9BYC8	-0.153438	0.267995	0.721808
THBS2.3339.33	THBS2	7058	P35442	0.420848	0.268005	0.721808
NRG3.10981.56	NRG3	10718	P56975	0.439151	0.26826	0.721873
AAGAB.11926.23	AAGAB	79719	Q6PD74	-0.30608	0.268318	0.721873
KLRC3.11571.75	KLRC3	3823	Q07444	-0.167528	0.268713	0.722229
DNAJC19.4545.53	DNAJC19	131118	Q96DA6	0.142583	0.268975	0.722229
LRRC4B.11911.13	LRRC4B	94030	Q9NT99	-0.177108	0.269055	0.722229
WNT7A.4889.82	WNT7A	7476	O00755	0.114781	0.269093	0.722229
KRT18.5354.11	KRT18	3875	P05783	-0.138695	0.269174	0.722229
SFTPB.10672.75	SFTPB	6439	P07988	-0.375072	0.270251	0.724732
RPS6KA6.12688.115	RPS6KA6		Q9UK32	0.186786	0.270812	0.725506
PPCS.17843.30	PPCS	79717	Q9HAB8	0.29377	0.270835	0.725506
KIAA1324.9097.5	KIAA1324	57535	Q6UXG2	0.114213	0.27134	0.725506
KLK12.3199.54	KLK12	43849	Q9UKR0	-0.323102	0.271563	0.725506
TIGIT.9638.2	TIGIT		Q495A1	0.380059	0.271759	0.725506
OTUB2.12493.42	OTUB2		Q96DC9	0.0967753	0.271785	0.725506
RAB1A.19223.6	RAB1A	5861	P62820	0.192465	0.271917	0.725506
FIBP.19169.88	FIBP	9158	O43427	0.291734	0.272081	0.725506
ZNF34.18265.18	ZNF34	80778	Q8IZ26	0.195787	0.272246	0.725506
IFNA8.6214.84	IFNA8	3445	P32881	-0.122955	0.272269	0.725506
BPIFB1.15367.38	BPIFB1	92747	Q8TDL5	0.361439	0.272502	0.725506
BGLAP.11067.13	BGLAP	632	P02818	-0.309509	0.272619	0.725506
XRCC4.9886.28	XRCC4	7518	Q13426	0.208918	0.27266	0.725506
EDF1.12415.122	EDF1	8721	O60869	0.127761	0.27285	0.725506
PTPRU.8337.65	PTPRU	10076	Q92729	-0.232613	0.27295	0.725506
UCHL5.17405.2	UCHL5	51377	Q9Y5K5	0.319872	0.272996	0.725506
RAB13.19282.3	RAB13	5872	P51153	0.253666	0.273116	0.725506
IL18RAP.2993.1	IL18RAP	8807	O95256	0.0942711	0.273154	0.725506
CNDP2.3192.3	CNDP2	55748	Q96KP4	0.153156	0.273432	0.725847
PCDH8.6280.11	PCDH8	5100	O95206	0.263732	0.273573	0.725847
KLHL7.12625.138	KLHL7		Q8IXQ5	-0.178008	0.27388	0.726276
MDM1.7898.29	MDM1	56890	Q8TC05	0.185499	0.27446	0.727429
RORC.11827.7	RORC		P51449	0.264869	0.275176	0.728939
SCG5.15358.28	SCG5	6447	P05408	-0.286403	0.27548	0.729247
TIMP4.6462.12	TIMP4	7079	Q99727	0.225834	0.275584	0.729247
ANGPT4.2500.2	ANGPT4	51378	Q9Y264	0.134008	0.276425	0.730137
RBM19.11468.15	RBM19		Q9Y4C8	0.319184	0.276523	0.730137
BCHE.15514.26	BCHE	590	P06276	-0.214073	0.276529	0.730137
CCDC90B.7792.58	CCDC90B	60492	Q9GZT6	0.160342	0.276694	0.730137
CD79A.7796.10	CD79A	973	P11912	0.158929	0.276745	0.730137
MAPK12.5005.4	MAPK12	6300	P53778	0.0777836	0.276797	0.730137
NTRK1.3477.63	NTRK1	4914	P04629	0.192619	0.277048	0.730412
HSPA1A.16780.6	HSPA1A	3303	P0DMV8	0.256742	0.277233	0.730516
ACP6.5742.14	ACP6	51205	Q9NPH0	-0.307789	0.277562	0.730585
MRVI1.8255.34	MRVI1	10335	Q9Y6F6	0.35716	0.277725	0.730585
SNX1.6955.68	SNX1	6642	Q13596	0.202424	0.277753	0.730585
KLHL12.12695.62	KLHL12		Q53G59	0.103795	0.278177	0.730585
IL1F10.17356.34	IL1F10	84639	Q8WWZ1	0.173108	0.278192	0.730585
LCTL.10890.135	LCTL	197021	Q6UWM7	0.255378	0.278234	0.730585
FAXDC2.9074.6	FAXDC2	10826	Q96IV6	-0.0763574	0.278362	0.730585
SPDEF.10012.5	SPDEF	25803	O95238	0.104231	0.278532	0.730585
CHST9.11646.4	CHST9	83539	Q7L1S5	-0.194316	0.278576	0.730585
MRPL21.8942.2	MRPL21	219927	Q7Z2W9	-0.1535	0.279132	0.731555
PGP.18235.16	PGP	283871	A6NDG6	-0.278214	0.279306	0.731555
YTHDC1.8878.48	YTHDC1	91746	Q96MU7	0.131726	0.279409	0.731555
FAM171B.8786.6	FAM171B	165215	Q6P995	-0.17316	0.279602	0.731555
IGHA1.IGHA2.11089.7	IGHA1 IGHA2	3493 3494	P01876 P01877	0.275891	0.279935	0.731555
GRAMD1C.8336.267	GRAMD1C	54762	Q8IYS0	0.112292	0.279948	0.731555
TMOD3.12861.13	TMOD3	29766	Q9NYL9	0.25711	0.280169	0.731555
GRB2.5464.52	GRB2	2885	P62993	0.354181	0.280177	0.731555
IL4.2906.55	IL4	3565	P05112	0.132903	0.280264	0.731555
CACNB4.11130.158	CACNB4		O00305	0.173692	0.280584	0.731635
LEG1.7154.92	LEG1	352999	Q6P5S2	-0.513934	0.280847	0.731635
LMNB1.3889.64	LMNB1	4001	P20700	0.168693	0.280916	0.731635
CLIC4.15314.49	CLIC4	25932	Q9Y696	0.344162	0.280989	0.731635
MPO.2580.83	MPO	4353	P05164	0.232623	0.281113	0.731635
RAG1.11311.79	RAG1	5896	P15918	0.0709455	0.281196	0.731635
GAS7.17721.82	GAS7	8522	O60861	0.180614	0.281327	0.731635
F11.2190.55	F11	2160	P03951	0.230704	0.281466	0.731635
ACPP.19317.114	ACPP	55	P15309	0.0941417	0.281676	0.731802
PRRG1.8306.54	PRRG1	5638	O14668	-0.0966474	0.281943	0.732114
NAT1.12632.14	NAT1	9	P18440	-0.124351	0.28239	0.732387
OTC.15431.31	OTC	5009	P00480	-0.582642	0.282398	0.732387
CLEC4G.10781.19	CLEC4G	339390	Q6UXB4	0.190824	0.282488	0.732387
GSTM3.9748.31	GSTM3	2947	P21266	-0.121418	0.282926	0.732866
STXBP6.18308.30	STXBP6	29091	Q8NFX7	0.2061	0.282966	0.732866
PROC.3758.68	PROC	5624	P04070	0.112811	0.283192	0.73307
ACPL2.6079.59	ACPL2	92370	Q8TE99	-0.120391	0.283423	0.733289
ESRRA.9873.17	ESRRA	2101	P11474	0.261218	0.283665	0.733534
ICT1.6380.23	ICT1	3396	Q14197	-0.225244	0.284027	0.734093
ZNF526.14619.8	ZNF526		Q8TF50	-0.140632	0.284199	0.734156
CRYZL1.9207.60	CRYZL1	9946	O95825	-0.256611	0.284956	0.73544
GZMA.3440.7	GZMA	3001	P12544	-0.174371	0.285233	0.73544
BDP1.8929.7	BDP1	55814	A6H8Y1	0.116314	0.285277	0.73544
ENTPD3.4436.1	ENTPD3	956	O75355	0.196452	0.285388	0.73544
ERO1L.7060.2	ERO1L	30001	Q96HE7	0.0964711	0.285432	0.73544
VIT.6234.74	VIT	5212	Q6UXI7	0.260223	0.285806	0.73579
ZAP70.3837.6	ZAP70	7535	P43403	-0.161483	0.28594	0.73579
BCAR3.5262.57	BCAR3	8412	O75815	0.136867	0.28601	0.73579
ZNF134.12787.47	ZNF134	7693	P52741	-0.0930871	0.28632	0.735801
KIAA2013.6538.90	KIAA2013	90231	Q8IYS2	0.139567	0.286448	0.735801
APOA2.7127.3	APOA2	336	P02652	-0.191138	0.286456	0.735801
CSMD1.9598.23	CSMD1	64478	Q96PZ7	0.144718	0.286789	0.736028
ADAMTS4.2809.25	ADAMTS4	9507	O75173	0.111918	0.286884	0.736028
ARPC5.18419.20	ARPC5	10092	O15511	-0.386199	0.286986	0.736028
JPH4.9111.40	JPH4	84502	Q96JJ6	0.168113	0.28805	0.73713
HSP90AA1.2625.53	HSP90AA1	3320	P07900	0.353576	0.288056	0.73713
ATP1B1.13392.13	ATP1B1	481	P05026	-0.226195	0.2882	0.73713
MASP1.9125.23	MASP1	5648	P48740	0.157253	0.288231	0.73713
ELANE.13671.40	ELANE	1991	P08246	0.227065	0.288391	0.73713
PKD2.13486.9	PKD2		Q13563	0.152118	0.288538	0.73713
IER3.9786.310	IER3	8870	P46695	0.128508	0.288706	0.73713
NANP.16863.47	NANP	140838	Q8TBE9	0.142103	0.288726	0.73713
TBCB.17686.27	TBCB	1155	Q99426	0.337127	0.28876	0.73713
SEMA7A.7019.13	SEMA7A	8482	O75326	0.200035	0.288951	0.73713
CCNB1IP1.9728.4	CCNB1IP1	57820	Q9NPC3	0.439544	0.289064	0.73713
NGRN.7153.66	NGRN	51335	Q9NPE2	-0.114829	0.289186	0.73713
EIF4EBP1.17372.5	EIF4EBP1	1978	Q13541	0.260204	0.289354	0.737182
EIF4E2.9745.20	EIF4E2	9470	O60573	0.24481	0.289675	0.737376
HSPA1A.14237.1	HSPA1A	3303	P0DMV8	0.200693	0.289806	0.737376
LIPK.6413.79	LIPK	643414	Q5VXJ0	0.0921469	0.289938	0.737376
KCNAB2.10015.119	KCNAB2	8514	Q13303	0.110889	0.290021	0.737376
ST8SIA2.7920.30	ST8SIA2	8128	Q92186	0.166991	0.290417	0.738009
VAPB.7181.17	VAPB	9217	O95292	-0.0524386	0.290743	0.73813
QDPR.11257.1	QDPR	5860	P09417	0.27106	0.29076	0.73813
PTK6.3832.51	PTK6	5753	Q13882	-0.177219	0.29105	0.73849
IFI16.12893.159	IFI16	3428	Q16666	0.360316	0.29221	0.741057
ZHX3.10036.201	ZHX3	23051	Q9H4I2	0.189688	0.292655	0.741214
PAPL.8011.96	PAPL	390928	Q6ZNF0	-0.121706	0.292874	0.741214
NEURL1.13604.27	NEURL1		O76050	0.210757	0.29289	0.741214
SUOX.18324.61	SUOX	6821	P51687	-0.357257	0.293108	0.741214
NRXN1.8971.9	NRXN1	9378	Q9ULB1	0.37217	0.293394	0.741214
PTPN7.14688.6	PTPN7		P35236	0.184653	0.293464	0.741214
PGRMC2.8681.93	PGRMC2	10424	O15173	-0.113474	0.293575	0.741214
GDF2.4880.21	GDF2	2658	Q9UK05	0.11741	0.293601	0.741214
GDF7.16756.30	GDF7	151449	Q7Z4P5	-0.136372	0.293608	0.741214
GOSR2.10426.21	GOSR2	9570	O14653	-0.228601	0.293819	0.741374
GZMH.3373.5	GZMH	2999	P20718	0.156476	0.294103	0.741441
GAL3ST2.10734.339	GAL3ST2	64090	Q9H3Q3	-0.331294	0.294143	0.741441
ARL2BP.18407.36	ARL2BP	23568	Q9Y2Y0	-0.341996	0.294486	0.741788
FIG4.6948.82	FIG4	9896	Q92562	-0.295044	0.294577	0.741788
TCEA1.18204.1	TCEA1	6917	P23193	0.330477	0.294823	0.742034
COX6A2.10535.25	COX6A2	1339	Q02221	-0.427698	0.295145	0.742469
UTS2.6020.52	UTS2	10911	O95399	-0.194071	0.295576	0.742825
SSMEM1.8298.8	SSMEM1	136263	Q8WWF3	0.220359	0.295702	0.742825
HDGFL1.18898.36	HDGFL1	154150	Q5TGJ6	0.104742	0.295747	0.742825
CXCL9.9188.119	CXCL9	4283	Q07325	0.341353	0.2959	0.742825
ANGPTL3.10391.1	ANGPTL3	27329	Q9Y5C1	0.255257	0.29603	0.742825
AFAP1L1.9889.42	AFAP1L1	134265	Q8TED9	-0.0617139	0.296192	0.74286
LCN8.5643.2	LCN8	138307	Q6JVE9	-0.283079	0.296449	0.743103
DHX9.10527.22	DHX9	1660	Q08211	0.147303	0.296587	0.743103
GPN1.16599.38	GPN1		Q9HCN4	0.181631	0.296852	0.743395
ERN1.11229.16	ERN1	2081	O75460	-0.190803	0.297087	0.74361
ETHE1.3847.56	ETHE1	23474	O95571	-0.16741	0.297311	0.743799
[truncated: 2,999 more rows]

## Sheet: Table S5_NES Ranked.
Supplementary Table 5. Biological processes differentially regulated in moderate COVID-19 patients with cardiac involvement.
GSEA was performed using GO data, along with SASP protein sets, to identify biological processes enriched in moderate COVID-19 patients with cardiac involvement (n=12) compared to those without cardiac involvement (n=13). Pathways are ranked according to NES or adjusted P values. Only significant pathways (padj < 0.05 after Benjamini-Hochberg correction) are displayed.
Pathway	setSize	enrichmentScore	NES	pvalue	p.adjust	qvalues	core_enrichment
GO_SINGLE_STRANDED_DNA_BINDING	35	0.61889	1.95165	7.03317e-05	0.0361945	0.0333335	HNRNPK/LONP1/RAD23A/RAD23B/YBX1/HNRNPA1/HMGB1/HNRNPA2B1/TSN/PURA/RPA2/SUB1/PURB/HMGB2/PCBP1/ANXA1
GO_CELLULAR_RESPONSE_TO_EXTRACELLULAR_STIMULUS	98	0.53107	1.93611	4.21301e-05	0.0355473	0.0327375	LCN2/GABARAP/GSTP1/GABARAPL1/MAP1LC3A/PTN/TNC/DSC2/INHBB/HNRNPA1/GLRX2/KRT20/BCL2/PTGS2/GABARAPL2/SOD1/UCN3/HSPA8/SFRP1/CD68/MAPK8/PDXP/AIF1/PIM1/MAPK1/UPP1/AOC1/MAX/CDKN1A/EIF2S1/MAP1LC3B/FOLR1/COL1A1/ICAM1/MAPK3/POSTN/MED1/PPM1D/ATG7/CBL
GO_PEPTIDOGLYCAN_BINDING	10	0.803726	1.90438	0.000139094	0.0477207	0.0439487	REG3A/REG1B/REG1A/PGLYRP1
GO_RNA_SPLICING_VIA_TRANSESTERIFICATION_REACTIONS	74	0.531216	1.8767	4.31714e-05	0.0355473	0.0327375	PSIP1/HNRNPK/SNRPG/RBFOX2/SRSF7/DHX8/RBM3/YBX1/HNRNPD/HNRNPF/HNRNPA1/SRSF6/CELF2/SNRPA/CIRBP/PQBP1/DDX39B/NUP98/HSPA8/HNRNPA2B1/SMNDC1/SNRPD2/SAP18/PUF60/POLR2J/RBM17/SF3B4/PCBP1/SNRPB2/EIF4A3/SF1/TRA2B/IK/PRDX6
GO_CELLULAR_RESPONSE_TO_STARVATION	50	0.554579	1.85383	8.98735e-05	0.0370009	0.0340762	GABARAP/GABARAPL1/MAP1LC3A/DSC2/INHBB/HNRNPA1/KRT20/BCL2/GABARAPL2/HSPA8/SFRP1/MAPK8/MAPK1/UPP1/AOC1/MAX/CDKN1A/EIF2S1/MAP1LC3B/MAPK3/PPM1D/ATG7
GO_RIBONUCLEOPROTEIN_COMPLEX	126	0.489862	1.82972	2.06607e-05	0.0283534	0.0261123	SRA1/RPL12/EIF3G/HNRNPK/SNRPG/HNRNPDL/RPLP2/G3BP1/HSPA1A/DHX8/RBM3/RPS27A/YBX1/HNRNPD/PABPC3/HNRNPF/HNRNPA1/VIM/G3BP2/HNRNPAB/CELF2/SNRPA/CIRBP/DDX39B/NUP98/RPS7/AGO1/HSPA8/HNRNPA2B1/SMNDC1/SNRPD2/PSMA6/RBM23/RPS19/TARBP2/RBM17/EIF2S1/SF3B4/ILF3/DDX6/RPS4X/SNRPB2/EIF4A3/SF1/PABPC4/TRA2B/SRP19/IK/HSF1/SSB/LGALS3/EIF4B/EIF3J/EIF4E/GAPDH
GO_RESPONSE_TO_STARVATION	67	0.509132	1.77571	0.00017425	0.0499484	0.0460004	GABARAP/GABARAPL1/MAP1LC3A/DSC2/ADM/INHBB/HNRNPA1/KRT20/BCL2/LRP11/FOXO3/GABARAPL2/UCN3/HSPA8/SFRP1/MAPK8/FSTL1/MAPK1/UPP1/AOC1/MAX/CDKN1A/EIF2S1/MAP1LC3B/MAPK3/PPM1D/ATG7/CBL
GO_RNA_SPLICING	93	0.479442	1.73923	0.000169119	0.0499484	0.0460004	PSIP1/HNRNPK/SNRPG/RBFOX2/HSPA1A/SRSF7/DHX8/RBM3/YBX1/HNRNPD/HNRNPF/HNRNPA1/SRSF6/CELF2/SNRPA/CIRBP/PQBP1/DDX39B/TAF15/NUP98/HSPA8/HNRNPA2B1/SMNDC1/SNRPD2/SAP18/PUF60/RBM39/POLR2J
GO_CELLULAR_RESPONSE_TO_EXTERNAL_STIMULUS	140	0.456004	1.71784	6.15789e-05	0.0361945	0.0333335	LCN2/GABARAP/GSTP1/GABARAPL1/MAP1LC3A/PTN/TNC/DSC2/INHBB/HNRNPA1/GLRX2/KRT20/TNFRSF1A/BCL2/PTGS2/GABARAPL2/SOD1/UCN3/PTPN11/HSPA8/SFRP1/NPPA/CD68/BAD/MAPK8/PDXP/AIF1/PIM1/MAPK1/UPP1/AOC1/MAX/TNFRSF10B/CDKN1A/EIF2S1/MAP1LC3B/FOLR1/COL1A1/ICAM1/MAPK3/GJA1/POSTN/MED1/PPM1D/ATG7/TNFRSF8/CBL
GO_RNA_BINDING	370	0.430023	1.70174	2.0026e-05	0.0283534	0.0261123	SUMO2/SRA1/TNRC6B/PSIP1/RPL12/HDGF/EIF1AD/EIF3G/HNRNPK/SNRPG/HNRNPDL/LONP1/TFRC/G3BP1/PIN4/RBFOX2/PDAP1/HSPA1A/SRSF7/DTD2/DHX8/RBM3/EWSR1/RPS27A/YBX1/HNRNPD/PABPC3/HNRNPF/HNRNPA1/TYMS/VIM/SRSF6/STAU2/LRP1/G3BP2/UBE2L3/HNRNPAB/EIF5A/CELF2/ERH/APEX1/SNRPA/AGFG1/CIRBP/HMGB1/DDX39B/TAF15/NUP98/YBX2/RRBP1/RPS7/AGO1/PEBP1/HSPA8/HNRNPA2B1/SMNDC1/SNRPD2/PARK7/EXOSC1/STAU1/SAP18/PUF60/PSMA6/RBM39/DUT/NQO1…
GO_RESPONSE_TO_ANTIBIOTIC	141	0.448576	1.69048	0.000123135	0.0460861	0.0424433	LCN2/GSTP1/MB/MAP1LC3A/TNC/EDN1/CA3/HNRNPD/RHOB/HNRNPA1/TYMS/GLRX2/CSF3/APEX1/CRH/BCL2/SOD1/KPNA4/STAT6/PARK7/BAD/AREG/NQO1/NET1/EFNA5/RBP4/AOC1/FABP1/CD27/CRK/ANXA1/COL1A1/ICAM1/ID1/HGF/RGS19/CD14/PTK2B/RHOA/CBL/ADIPOQ/KLF4/TRH/NEFL/HAMP/HSF1/G6PD/RGS4/HDAC2/STAR/MAPK13/PTH/PDGFD/CDKN1B/STAT1/IL18RAP/HSP90AA1/EIF4EBP1/TP53/PTEN/HMOX1/MEF2C/PCNA/AIFM1/SLC26A5/HSPA5
GO_MRNA_METABOLIC_PROCESS	193	0.428641	1.64979	6.07189e-05	0.0361945	0.0333335	TNRC6B/PSIP1/RPL12/HNRNPK/SNRPG/RPLP2/RBFOX2/HSPA1A/SRSF7/DHX8/RBM3/RPS27A/YBX1/HNRNPD/PABPC3/HNRNPF/HNRNPA1/VIM/SRSF6/CELF2/APEX1/SNRPA/CIRBP/PQBP1/DDX39B/TAF15/NUP98/UBB/RNASE4/RPS7/AGO1/HSPA8/HNRNPA2B1/SMNDC1/SNRPD2/EXOSC1/SAP18/PUF60/PSMA6/RBM39/POLR2J/RBM23/RPS19/PSMD11/HIF1A/RBM17/HIPK3/PSMA2/GDNF/YWHAB/SF3B4/PSMD10/PCBP1/DDX6/PSMB1/MED1/RPS4X/SNRPB2/FLNA/EIF4A3/SF1/PABPC4/TRA2B/IK/HSF1/PSM…
SENESCENCE_ASSOCIATED_SECRETORY_PHENOTYPE_2	403	0.405269	1.60758	2.00136e-05	0.0283534	0.0261123	TAGLN/IGFBP2/FSTL3/PRKCSH/ESM1/PCOLCE/RPL12/GSTP1/VEGFC/HNRNPK/GLRX/CST3/B2M/TFRC/RPLP2/CTHRC1/GM2A/SH3BGRL/TNC/RAD23B/TNFRSF1B/MAP2K2/PXDN/COL18A1/PI3/LMAN2/HNRNPD/HNRNPA1/VIM/LTBP4/CST1/TNFRSF1A/CSF3/COL6A3/BCL2/IL1RL1/HMGB1/EFEMP1/CD248/SOD1/RGMB/DKK3/IGFBP6/RRBP1/MYL12A/RNASE4/NID1/PEBP1/NUCB1/HSPA8/B4GALT1/SFRP1/TXNDC5/MMP13/IL1RN/PTX3/PARK7/SPP1/FSTL1/NBL1/AREG/RARRES2/ANG/PVR/CXCL11/IGFBP4…
GO_POSITIVE_REGULATION_OF_CELL_POPULATION_PROLIFERATION	441	0.356829	1.41938	8.00368e-05	0.0366124	0.0337184	SHC1/IGFBP2/ESM1/SMAD4/VEGFC/REG3A/REG1B/TFRC/PTPN6/CTHRC1/EFNB1/REG1A/PTN/TNC/TAC1/EDN1/COL18A1/ADM/CD46/MAP3K3/SRSF6/MDK/IL18/RIPK2/CCL14/EIF5A/CSF3/FGF16/CRH/BCL2/PRTN3/PTGS2/CSF1/HMGB1/STAMBP/CD248/DDX39B/CRLF2/LRP2/CD55/B4GALT1/SFRP1/LGALS9/FGFBP1/CD40LG/CLEC7A/BAD/PRKCZ/ACVRL1/AREG/FGF3/DDR2/AIF1/ANG/PIM1/LTF/PROK2/DLL1/F3/ASH2L/PURA/MAPK1/TGFBR3/MMP12/BAMBI/HIF1A/CXCL10/GDNF/FGF5/CD38/CX3C…
GO_METAL_ION_TRANSMEMBRANE_TRANSPORTER_ACTIVITY	50	-0.47884	-2.16926	0.000181984	0.0499484	0.0460004	SLC3A2/SLC4A8/ATP1B1/TF/SLC30A3/SLC6A9/ATP4B/NIPAL4/JPH1/SLC6A14/KCNIP3/KCNMB3/CACNA2D3/SCN2B/KCNE3/SLC5A8/LRRC52

## Sheet: Table S5_Padj Ranked.
Supplementary Table 5. Biological processes differentially regulated in moderate COVID-19 patients with cardiac involvement.
GSEA was performed using GO data, along with SASP protein sets, to identify biological processes enriched in moderate COVID-19 patients with cardiac involvement (n=12) compared to those without cardiac involvement (n=13). Pathways are ranked according to NES or adjusted P values. Only significant pathways (padj < 0.05 after Benjamini-Hochberg correction) are displayed.
Pathway	setSize	enrichmentScore	NES	pvalue	p.adjust	qvalues	core_enrichment
SENESCENCE_ASSOCIATED_SECRETORY_PHENOTYPE_2	403	0.405269	1.60758	2.00136e-05	0.0283534	0.0261123	TAGLN/IGFBP2/FSTL3/PRKCSH/ESM1/PCOLCE/RPL12/GSTP1/VEGFC/HNRNPK/GLRX/CST3/B2M/TFRC/RPLP2/CTHRC1/GM2A/SH3BGRL/TNC/RAD23B/TNFRSF1B/MAP2K2/PXDN/COL18A1/PI3/LMAN2/HNRNPD/HNRNPA1/VIM/LTBP4/CST1/TNFRSF1A/CSF3/COL6A3/BCL2/IL1RL1/HMGB1/EFEMP1/CD248/SOD1/RGMB/DKK3/IGFBP6/RRBP1/MYL12A/RNASE4/NID1/PEBP1/NUCB1/HSPA8/B4GALT1/SFRP1/TXNDC5/MMP13/IL1RN/PTX3/PARK7/SPP1/FSTL1/NBL1/AREG/RARRES2/ANG/PVR/CXCL11/IGFBP4…
GO_RNA_BINDING	370	0.430023	1.70174	2.0026e-05	0.0283534	0.0261123	SUMO2/SRA1/TNRC6B/PSIP1/RPL12/HDGF/EIF1AD/EIF3G/HNRNPK/SNRPG/HNRNPDL/LONP1/TFRC/G3BP1/PIN4/RBFOX2/PDAP1/HSPA1A/SRSF7/DTD2/DHX8/RBM3/EWSR1/RPS27A/YBX1/HNRNPD/PABPC3/HNRNPF/HNRNPA1/TYMS/VIM/SRSF6/STAU2/LRP1/G3BP2/UBE2L3/HNRNPAB/EIF5A/CELF2/ERH/APEX1/SNRPA/AGFG1/CIRBP/HMGB1/DDX39B/TAF15/NUP98/YBX2/RRBP1/RPS7/AGO1/PEBP1/HSPA8/HNRNPA2B1/SMNDC1/SNRPD2/PARK7/EXOSC1/STAU1/SAP18/PUF60/PSMA6/RBM39/DUT/NQO1…
GO_RIBONUCLEOPROTEIN_COMPLEX	126	0.489862	1.82972	2.06607e-05	0.0283534	0.0261123	SRA1/RPL12/EIF3G/HNRNPK/SNRPG/HNRNPDL/RPLP2/G3BP1/HSPA1A/DHX8/RBM3/RPS27A/YBX1/HNRNPD/PABPC3/HNRNPF/HNRNPA1/VIM/G3BP2/HNRNPAB/CELF2/SNRPA/CIRBP/DDX39B/NUP98/RPS7/AGO1/HSPA8/HNRNPA2B1/SMNDC1/SNRPD2/PSMA6/RBM23/RPS19/TARBP2/RBM17/EIF2S1/SF3B4/ILF3/DDX6/RPS4X/SNRPB2/EIF4A3/SF1/PABPC4/TRA2B/SRP19/IK/HSF1/SSB/LGALS3/EIF4B/EIF3J/EIF4E/GAPDH
GO_CELLULAR_RESPONSE_TO_EXTRACELLULAR_STIMULUS	98	0.53107	1.93611	4.21301e-05	0.0355473	0.0327375	LCN2/GABARAP/GSTP1/GABARAPL1/MAP1LC3A/PTN/TNC/DSC2/INHBB/HNRNPA1/GLRX2/KRT20/BCL2/PTGS2/GABARAPL2/SOD1/UCN3/HSPA8/SFRP1/CD68/MAPK8/PDXP/AIF1/PIM1/MAPK1/UPP1/AOC1/MAX/CDKN1A/EIF2S1/MAP1LC3B/FOLR1/COL1A1/ICAM1/MAPK3/POSTN/MED1/PPM1D/ATG7/CBL
GO_RNA_SPLICING_VIA_TRANSESTERIFICATION_REACTIONS	74	0.531216	1.8767	4.31714e-05	0.0355473	0.0327375	PSIP1/HNRNPK/SNRPG/RBFOX2/SRSF7/DHX8/RBM3/YBX1/HNRNPD/HNRNPF/HNRNPA1/SRSF6/CELF2/SNRPA/CIRBP/PQBP1/DDX39B/NUP98/HSPA8/HNRNPA2B1/SMNDC1/SNRPD2/SAP18/PUF60/POLR2J/RBM17/SF3B4/PCBP1/SNRPB2/EIF4A3/SF1/TRA2B/IK/PRDX6
GO_MRNA_METABOLIC_PROCESS	193	0.428641	1.64979	6.07189e-05	0.0361945	0.0333335	TNRC6B/PSIP1/RPL12/HNRNPK/SNRPG/RPLP2/RBFOX2/HSPA1A/SRSF7/DHX8/RBM3/RPS27A/YBX1/HNRNPD/PABPC3/HNRNPF/HNRNPA1/VIM/SRSF6/CELF2/APEX1/SNRPA/CIRBP/PQBP1/DDX39B/TAF15/NUP98/UBB/RNASE4/RPS7/AGO1/HSPA8/HNRNPA2B1/SMNDC1/SNRPD2/EXOSC1/SAP18/PUF60/PSMA6/RBM39/POLR2J/RBM23/RPS19/PSMD11/HIF1A/RBM17/HIPK3/PSMA2/GDNF/YWHAB/SF3B4/PSMD10/PCBP1/DDX6/PSMB1/MED1/RPS4X/SNRPB2/FLNA/EIF4A3/SF1/PABPC4/TRA2B/IK/HSF1/PSM…
GO_CELLULAR_RESPONSE_TO_EXTERNAL_STIMULUS	140	0.456004	1.71784	6.15789e-05	0.0361945	0.0333335	LCN2/GABARAP/GSTP1/GABARAPL1/MAP1LC3A/PTN/TNC/DSC2/INHBB/HNRNPA1/GLRX2/KRT20/TNFRSF1A/BCL2/PTGS2/GABARAPL2/SOD1/UCN3/PTPN11/HSPA8/SFRP1/NPPA/CD68/BAD/MAPK8/PDXP/AIF1/PIM1/MAPK1/UPP1/AOC1/MAX/TNFRSF10B/CDKN1A/EIF2S1/MAP1LC3B/FOLR1/COL1A1/ICAM1/MAPK3/GJA1/POSTN/MED1/PPM1D/ATG7/TNFRSF8/CBL
GO_SINGLE_STRANDED_DNA_BINDING	35	0.61889	1.95165	7.03317e-05	0.0361945	0.0333335	HNRNPK/LONP1/RAD23A/RAD23B/YBX1/HNRNPA1/HMGB1/HNRNPA2B1/TSN/PURA/RPA2/SUB1/PURB/HMGB2/PCBP1/ANXA1
GO_POSITIVE_REGULATION_OF_CELL_POPULATION_PROLIFERATION	441	0.356829	1.41938	8.00368e-05	0.0366124	0.0337184	SHC1/IGFBP2/ESM1/SMAD4/VEGFC/REG3A/REG1B/TFRC/PTPN6/CTHRC1/EFNB1/REG1A/PTN/TNC/TAC1/EDN1/COL18A1/ADM/CD46/MAP3K3/SRSF6/MDK/IL18/RIPK2/CCL14/EIF5A/CSF3/FGF16/CRH/BCL2/PRTN3/PTGS2/CSF1/HMGB1/STAMBP/CD248/DDX39B/CRLF2/LRP2/CD55/B4GALT1/SFRP1/LGALS9/FGFBP1/CD40LG/CLEC7A/BAD/PRKCZ/ACVRL1/AREG/FGF3/DDR2/AIF1/ANG/PIM1/LTF/PROK2/DLL1/F3/ASH2L/PURA/MAPK1/TGFBR3/MMP12/BAMBI/HIF1A/CXCL10/GDNF/FGF5/CD38/CX3C…
GO_CELLULAR_RESPONSE_TO_STARVATION	50	0.554579	1.85383	8.98735e-05	0.0370009	0.0340762	GABARAP/GABARAPL1/MAP1LC3A/DSC2/INHBB/HNRNPA1/KRT20/BCL2/GABARAPL2/HSPA8/SFRP1/MAPK8/MAPK1/UPP1/AOC1/MAX/CDKN1A/EIF2S1/MAP1LC3B/MAPK3/PPM1D/ATG7
GO_RESPONSE_TO_ANTIBIOTIC	141	0.448576	1.69048	0.000123135	0.0460861	0.0424433	LCN2/GSTP1/MB/MAP1LC3A/TNC/EDN1/CA3/HNRNPD/RHOB/HNRNPA1/TYMS/GLRX2/CSF3/APEX1/CRH/BCL2/SOD1/KPNA4/STAT6/PARK7/BAD/AREG/NQO1/NET1/EFNA5/RBP4/AOC1/FABP1/CD27/CRK/ANXA1/COL1A1/ICAM1/ID1/HGF/RGS19/CD14/PTK2B/RHOA/CBL/ADIPOQ/KLF4/TRH/NEFL/HAMP/HSF1/G6PD/RGS4/HDAC2/STAR/MAPK13/PTH/PDGFD/CDKN1B/STAT1/IL18RAP/HSP90AA1/EIF4EBP1/TP53/PTEN/HMOX1/MEF2C/PCNA/AIFM1/SLC26A5/HSPA5
GO_PEPTIDOGLYCAN_BINDING	10	0.803726	1.90438	0.000139094	0.0477207	0.0439487	REG3A/REG1B/REG1A/PGLYRP1
GO_RNA_SPLICING	93	0.479442	1.73923	0.000169119	0.0499484	0.0460004	PSIP1/HNRNPK/SNRPG/RBFOX2/HSPA1A/SRSF7/DHX8/RBM3/YBX1/HNRNPD/HNRNPF/HNRNPA1/SRSF6/CELF2/SNRPA/CIRBP/PQBP1/DDX39B/TAF15/NUP98/HSPA8/HNRNPA2B1/SMNDC1/SNRPD2/SAP18/PUF60/RBM39/POLR2J
GO_RESPONSE_TO_STARVATION	67	0.509132	1.77571	0.00017425	0.0499484	0.0460004	GABARAP/GABARAPL1/MAP1LC3A/DSC2/ADM/INHBB/HNRNPA1/KRT20/BCL2/LRP11/FOXO3/GABARAPL2/UCN3/HSPA8/SFRP1/MAPK8/FSTL1/MAPK1/UPP1/AOC1/MAX/CDKN1A/EIF2S1/MAP1LC3B/MAPK3/PPM1D/ATG7/CBL
GO_METAL_ION_TRANSMEMBRANE_TRANSPORTER_ACTIVITY	50	-0.47884	-2.16926	0.000181984	0.0499484	0.0460004	SLC3A2/SLC4A8/ATP1B1/TF/SLC30A3/SLC6A9/ATP4B/NIPAL4/JPH1/SLC6A14/KCNIP3/KCNMB3/CACNA2D3/SCN2B/KCNE3/SLC5A8/LRRC52

## Sheet: Table S6_Padj Ranked.
Supplementary Table 6. Plasma proteins differentially expressed with cardiac involvement in severe COVID-19.
Plasma proteomic profiles of severe COVID-19 patients with cardiac involvement (n=15) were compared to COVID-19 patients with similar disease severity but without cardiac involvement (n=14). Relative differences in protein levels are shown as log2(fold change). Padj < 0.05 after Benjamini-Hochberg correction was considered significant
Protein ID	EntrezSymbol	EntrezID	UniProtID	logFC	P.Value	adj.P.Val
PCDHGA12.6938.21	PCDHGA12	26025	O60330	1.13425	7.07046e-11	3.5324e-07
TTN.11352.42	TTN	7273	Q8WZ42	1.41424	2.20863e-09	5.26907e-06
PCDHGA10.6321.65	PCDHGA10	56106	Q9Y5H3	1.55449	4.16237e-09	5.26907e-06
CEACAM8.18873.8	CEACAM8	1088	P31997	1.1296	4.21863e-09	5.26907e-06
CHCHD10.11270.17	CHCHD10		Q8WYQ3	1.12387	5.52489e-08	4.86182e-05
HSPB6.19127.1	HSPB6	126393	O14558	1.75637	5.83885e-08	4.86182e-05
TNNT2.5315.22	TNNT2	7139	P45379	2.00435	1.55144e-07	0.000110728
PPP1R1A.17706.4	PPP1R1A	5502	Q13522	0.9476	5.57498e-07	0.000348158
PCDHAC2.9361.7	PCDHAC2	56134	Q9Y5I4	1.10804	6.75545e-07	0.000375002
RNASE1.7211.2	RNASE1	6035	P07998	2.58267	1.00826e-06	0.000503726
SRL.10940.25	SRL	6345	Q86TD4	1.05289	1.63946e-06	0.000744614
ATP5J.7788.1	ATP5J	522	P18859	1.5759	2.1343e-06	0.00077313
REG1A.13095.51	REG1A	5967	P05451	1.80022	2.35566e-06	0.00077313
RNASE6.5646.20	RNASE6	6039	Q93091	1.31819	2.37015e-06	0.00077313
MYL3.18376.19	MYL3	4634	P08590	2.3302	2.47373e-06	0.00077313
LCN2.2836.68	LCN2	3934	P80188	1.39805	2.476e-06	0.00077313
GM2A.15441.6	GM2A	2760	P17900	1.30986	2.76476e-06	0.000791077
FSTL3.3438.10	FSTL3	10272	O95633	1.07127	2.85016e-06	0.000791077
ASGR1.5452.71	ASGR1	432	P07306	1.67623	3.62427e-06	0.00092432
CD58.10938.13	CD58	965	P19256	0.897349	3.8283e-06	0.00092432
PPIC.18819.21	PPIC	5480	P45877	1.04894	3.88525e-06	0.00092432
FCRL5.6103.70	FCRL5	83416	Q96RD9	0.729005	4.73734e-06	0.00103844
CST3.2609.59	CST3	1471	P01034	1.10242	4.78065e-06	0.00103844
ANP32B.4194.26	ANP32B	10541	Q92688	0.593654	5.37743e-06	0.00108177
MB.3042.7	MB	4151	P02144	1.34199	5.4132e-06	0.00108177
FABP3.5437.63	FABP3	2170	P05413	1.3537	7.05696e-06	0.00135602
OXT.8356.88	OXT	5020	P01178	0.915761	8.63349e-06	0.00159752
PXDN.13463.1	PXDN	7837	Q92626	1.97662	1.05283e-05	0.00187388
RETN.3046.31	RETN	56729	Q9HD89	1.06338	1.08772e-05	0.00187388
RBFOX2.11462.8	RBFOX2	23543	O43251	0.90296	1.32589e-05	0.00211177
COL28A1.10702.1	COL28A1	340267	Q2UY09	1.22759	1.34707e-05	0.00211177
TNFRSF1A.2654.19	TNFRSF1A	7132	P19438	1.13134	1.35261e-05	0.00211177
NDUFV2.7748.11	NDUFV2	4729	P19404	0.885048	1.48238e-05	0.00219421
OIT3.6296.36	OIT3	170392	Q8WWZ8	1.13519	1.49326e-05	0.00219421
PI3.4982.54	PI3	5266	P19957	1.76283	1.56358e-05	0.0022319
B2M.3485.28	B2M	567	P61769	1.2997	1.96648e-05	0.00271315
ACVRL1.16318.12	ACVRL1	94	P37023	0.863221	2.00934e-05	0.00271315
SMOC2.15635.4	SMOC2	64094	Q9H3U7	1.05572	2.24883e-05	0.00286483
SELM.15336.7	SELM		Q8WWX9	1.00464	2.27949e-05	0.00286483
TFF3.4721.54	TFF3	7033	Q07654	1.41421	2.2937e-05	0.00286483
NBL1.2944.66	NBL1	4681	P41271	1.44069	2.39333e-05	0.00291636
TAGLN.15640.54	TAGLN	6876	Q01995	1.2184	2.51717e-05	0.00299423
NPPB.7655.11	NPPB	4879	P16860	1.89234	2.6632e-05	0.00309427
EGFLAM.12338.27	EGFLAM		Q63HQ2	0.96433	2.87887e-05	0.00326883
REG1B.16770.3	REG1B	5968	P48304	1.00063	3.05404e-05	0.00339066
CCDC80.3234.23	CCDC80	151887	Q76M96	0.910254	3.59799e-05	0.00390773
TMED2.10761.5	TMED2	10959	Q15363	0.516083	3.68913e-05	0.00391486
IGFLR1.7244.16	IGFLR1	79713	Q9H665	1.39084	3.88587e-05	0.00391486
PF4.2697.7	PF4	5196	P02776	-1.19368	3.97375e-05	0.00391486
EDA2R.3083.71	EDA2R	60401	Q9HAV5	0.775757	3.9746e-05	0.00391486
DCLK1.17156.72	DCLK1	9201	O15075	1.009	3.99635e-05	0.00391486
CREB3L4.11308.8	CREB3L4		Q8TEY5	0.677877	4.20168e-05	0.00403684
IGFBP2.8469.41	IGFBP2	3485	P18065	1.27876	4.38708e-05	0.00413544
LRP10.16610.13	LRP10	26020	Q7Z4F1	0.81762	4.47125e-05	0.00413674
STX8.10903.50	STX8	9482	Q9UNK0	1.02364	5.97649e-05	0.00542882
CD59.11514.196	CD59	966	P13987	0.916561	6.67549e-05	0.00595549
CLSTN3.6291.55	CLSTN3	9746	Q9BQT9	1.18428	7.1027e-05	0.00622545
SOD2.5008.51	SOD2	6648	P04179	-0.552934	7.44881e-05	0.00641625
ANGPT2.2602.2	ANGPT2	285	O15123	1.4582	7.94379e-05	0.00672664
GAGE2D.18273.14	GAGE2D	729408	Q9UEU5	0.821641	8.40768e-05	0.00700079
NPDC1.10424.31	NPDC1	56654	Q9NQX5	0.828195	8.67383e-05	0.00710401
MMP10.8479.4	MMP10	4319	P09238	0.842322	9.04249e-05	0.0072865
TFF3.8323.163	TFF3	7033	Q07654	1.07091	9.271e-05	0.00732199
COL6A3.11196.31	COL6A3	1293	P12111	1.20627	9.37965e-05	0.00732199
TMX3.5654.70	TMX3	54495	Q96JJ7	0.718874	0.000104294	0.00801619
TMED10.6506.54	TMED10	10972	P49755	1.05739	0.000117825	0.00886258
REG3A.15304.1	REG3A	5068	Q06141	1.51017	0.000120472	0.00886258
BAMBI.8811.24	BAMBI	25805	Q13145	0.721802	0.000121922	0.00886258
SUMO2.19555.1	SUMO2	6613	P61956	1.2204	0.000122401	0.00886258
ILF3.12759.47	ILF3	3609	Q12906	0.800342	0.000124443	0.00888166
DBI.16919.1	DBI	1622	P07108	1.02529	0.000136543	0.00960804
CSRP3.9171.11	CSRP3	8048	P50461	1.23388	0.000142002	0.00984245
NPS.6390.18	NPS	594857	P0C0P6	-0.737075	0.000147649	0.00984245
F3.4931.59	F3	2152	P13726	0.924023	0.000147716	0.00984245
CNPY3.17327.3	CNPY3		Q9BT09	1.00567	0.000147755	0.00984245
ROR2.7861.9	ROR2	4920	Q01974	1.15663	0.000150377	0.00988528
KLK11.2831.29	KLK11	11012	Q9UBX7	0.598012	0.000160209	0.0103949
GDF11.MSTN.2765.4	GDF11 MSTN		O95390 O14793	-0.553188	0.000179121	0.011449
NOTUM.8252.2	NOTUM	147111	Q6P988	-0.905042	0.000181038	0.011449
SRSF6.11573.3	SRSF6		Q13247	0.853098	0.00019509	0.0121582
SEPT11.12620.3	2020-09-11	55752	Q9NVA2	0.425414	0.00019712	0.0121582
TXNDC5.11212.7	TXNDC5	81567	Q8NBS9	0.810771	0.000203024	0.0123696
HDGF.8953.47	HDGF	3068	P51858	0.884552	0.000213688	0.0128625
STX3.7186.111	STX3	6809	Q13277	0.536348	0.00021989	0.0130782
EFNA5.2615.60	EFNA5	1946	P52803	0.826353	0.000223633	0.0131444
MYOM2.13534.20	MYOM2	9172	P54296	1.3912	0.00022925	0.0133178
TCN1.19614.8	TCN1	6947	P20061	1.19977	0.000235063	0.0134986
LMAN2.9468.8	LMAN2	10960	Q12907	0.931501	0.000243608	0.0138303
PGLYRP2.5601.2	PGLYRP2	114770	Q96PD5	-0.708547	0.000248714	0.0139615
TNFRSF19.5131.15	TNFRSF19	55504	Q9NS68	0.850703	0.000269387	0.014954
RANBP3.14037.18	RANBP3	8498	Q9H6Z4	0.895019	0.000275563	0.0149829
UTS2B.6290.3	UTS2B	257313	Q765I0	0.44995	0.000279205	0.0149829
BTN3A3.17692.2	BTN3A3	10384	O00478	0.960561	0.000286452	0.0149829
CTSA.3179.51	CTSA	5476	P10619	-0.753397	0.000287157	0.0149829
PLAUR.2652.15	PLAUR	5329	Q03405	0.699374	0.000287411	0.0149829
RNASE10.5602.62	RNASE10	338879	Q5GAN6	0.453277	0.000287903	0.0149829
HAVCR2.5134.52	HAVCR2	84868	Q8TDQ0	0.732266	0.000309176	0.0158576
SRSF7.12987.12	SRSF7		Q16629	0.863298	0.000311058	0.0158576
TNFSF15.2968.61	TNFSF15	9966	O95150	0.607216	0.000322406	0.0162701
EPHA2.4834.61	EPHA2	1969	P29317	1.03283	0.000334008	0.0166715
ENPP5.6556.5	ENPP5	59084	Q9UJA9	-0.654727	0.000337033	0.0166715
CPLX2.15321.8	CPLX2		Q6PUV4	1.02626	0.000347292	0.0170105
SECTM1.13093.6	SECTM1	6398	Q8WVN6	0.767246	0.000355457	0.0171327
TREM1.9266.1	TREM1	54210	Q9NP99	0.859638	0.000356646	0.0171327
CYR61.6264.9	CYR61	3491	O00622	0.660354	0.000390792	0.0185557
PRSS2.5034.79	PRSS2	5645	P07478	1.40705	0.00039625	0.0185557
CHGB.8235.48	CHGB	1114	P05060	1.12769	0.00039741	0.0185557
CLMP.10440.26	CLMP	79827	Q9H6B4	0.756989	0.000401798	0.0185869
EFNA2.14124.6	EFNA2	1943	O43921	0.811818	0.000412017	0.0188211
ARHGAP1.11955.1	ARHGAP1	392	Q07960	0.558091	0.000414395	0.0188211
ANXA6.5335.73	ANXA6	309	P08133	-1.28718	0.000421407	0.0189671
SPP1.13113.7	SPP1	6696	P10451	1.16617	0.000427682	0.0190777
SF1.12777.11	SF1	7536	Q15637	0.430139	0.000445681	0.019286
TNNI2.5440.26	TNNI2	7136	P48788	1.5018	0.000448149	0.019286
ACTN2.9844.138	ACTN2	88	P35609	1.80604	0.000451175	0.019286
ACYP2.12812.25	ACYP2	98	P14621	0.833285	0.000452931	0.019286
CD300A.5630.48	CD300A	11314	Q9UGN4	0.817017	0.000454955	0.019286
GHR.2948.58	GHR	2690	P10912	-0.634074	0.000455515	0.019286
CCL23.2913.1	CCL23	6368	P55773	0.800247	0.000474113	0.0196485
PRKAR1B.12479.50	PRKAR1B	5575	P31321	0.838322	0.00047426	0.0196485
FABP4.15386.7	FABP4	2167	P15090	0.972279	0.000475875	0.0196485
COL18A1.2201.17	COL18A1	80781	P39060	0.711834	0.000490413	0.0200828
EFNB1.13104.32	EFNB1	1947	P98172	0.714367	0.000506171	0.0205596
BMPER.15368.3	BMPER	168667	Q8N8U9	0.549584	0.000520242	0.0209607
CISD1.7745.3	CISD1	55847	Q9NZ45	0.490098	0.000530452	0.0212011
JAM2.2997.8	JAM2	58494	P57087	0.426271	0.000552724	0.0219159
IGFBP4.2950.57	IGFBP4	3487	P22692	0.636807	0.000563258	0.0221126
ITSN1.14070.56	ITSN1		Q15811	0.350422	0.000566537	0.0221126
PAFAH1B2.2642.4	PAFAH1B2	5049	P68402	0.589367	0.000574605	0.0222537
DSC2.13126.52	DSC2	1824	Q02487	0.868429	0.000591264	0.0227227
WISP2.6392.7	WISP2	8839	O76076	0.683179	0.000614407	0.0234319
STC1.4930.21	STC1	6781	P52823	0.9419	0.000624675	0.023643
INA.11436.6	INA	9118	Q16352	0.683755	0.000648411	0.0243569
TCEAL3.19112.2	TCEAL3	85012	Q969E4	0.911244	0.000661239	0.0245428
DDR2.15381.45	DDR2	4921	Q16832	0.706481	0.000663185	0.0245428
MSMB.10620.21	MSMB	4477	P08118	1.37249	0.000697857	0.0254514
PRSS22.4534.10	PRSS22	64063	Q9GZN4	0.742971	0.000702428	0.0254514
MAP2K2.3628.3	MAP2K2	5605	P36507	0.85105	0.000703021	0.0254514
TNC.6259.60	TNC	3371	P24821	0.723778	0.000709071	0.0254659
CLEC4G.10781.19	CLEC4G	339390	Q6UXB4	0.58658	0.000714873	0.0254659
SPINK1.8243.55	SPINK1	6690	P00995	0.696697	0.000718714	0.0254659
MAZ.13436.54	MAZ		P56270	0.432837	0.000785802	0.0276469
PVRL2.6245.4	PVRL2	5819	Q92692	0.478724	0.000820162	0.0282943
CFL2.15339.32	CFL2	1073	Q9Y281	1.37949	0.000822597	0.0282943
IBSP.3415.61	IBSP	3381	P21815	1.32497	0.000825573	0.0282943
SHBG.4929.55	SHBG	6462	P04278	-0.933952	0.000826856	0.0282943
SDF2L1.6990.44	SDF2L1	23753	Q9HCN8	0.593645	0.000842015	0.0286171
ADAMTS15.4533.76	ADAMTS15	170689	Q8TE58	0.293587	0.000848999	0.0286387
TNFRSF1B.3152.57	TNFRSF1B	7133	P20333	0.898539	0.000857977	0.0286387
B4GALT1.13381.49	B4GALT1	2683	P15291	0.594846	0.00085985	0.0286387
CD55.5069.9	CD55	1604	P08174	0.582931	0.000869646	0.0287732
LRP11.15472.16	LRP11	84918	Q86VZ4	0.608149	0.000902497	0.0295507
MXRA7.8005.1	MXRA7	439921	P84157	0.702368	0.000904976	0.0295507
MANSC1.9557.5	MANSC1	54682	Q9H8J5	0.631535	0.000940385	0.0302568
CA3.3799.11	CA3	761	P07451	1.28247	0.000950496	0.0302568
EWSR1.12988.49	EWSR1	2130	Q01844	0.960195	0.000950939	0.0302568
TWSG1.9234.8	TWSG1	57045	Q9GZX9	0.53423	0.000951543	0.0302568
ALDH1A3.9835.16	ALDH1A3	220	P47895	-1.17623	0.000956882	0.0302568
OGN.17224.12	OGN	4969	P20774	0.725762	0.00108352	0.0339153
TMPO.8265.225	TMPO	7112	P42167	0.993482	0.00109119	0.0339153
CSMD2.9971.5	CSMD2	114784	Q7Z408	0.445937	0.0010971	0.0339153
TNFRSF1B.8368.102	TNFRSF1B	7133	P20333	0.837133	0.00110343	0.0339153
CBLN4.5688.65	CBLN4	140689	Q9NTU7	-0.663175	0.00110652	0.0339153
NPPB.16751.15	NPPB	4879	P16860	0.721387	0.0011549	0.0351822
NTN4.3327.27	NTN4	59277	Q9HB63	0.74494	0.00117219	0.0354924
RSPO3.8427.118	RSPO3	84870	Q9BXY4	0.740281	0.00120089	0.0359494
SIRPB1.6247.9	SIRPB1	10326	O00241	1.15967	0.00120662	0.0359494
GPC1.8697.38	GPC1	2817	P35052	0.331147	0.00120887	0.0359494
NELL2.6022.57	NELL2	4753	Q99435	0.481211	0.00125678	0.0371026
ADM.7922.5	ADM	133	P35318	0.484214	0.0012625	0.0371026
CLEC3B.5701.81	CLEC3B	7123	P05452	-0.386729	0.00130031	0.0379796
VEGFA.4867.15	VEGFA	7422	P15692	-0.875487	0.00130754	0.0379796
NMB.9321.400	NMB	4828	P08949	0.557912	0.00134909	0.0389597
COL15A1.8974.172	COL15A1	1306	P39059	0.721224	0.00137041	0.0393481
EFNB2.14131.37	EFNB2	1948	P52799	0.816068	0.00140444	0.0400948
KRT1.9931.20	KRT1	3848	P04264	1.04313	0.00141625	0.0402022
BAGE3.6442.6	BAGE3	85318	Q86Y29	-0.594383	0.00143921	0.040623
RSPO3.13094.75	RSPO3	84870	Q9BXY4	0.776235	0.00145613	0.0408697
STX12.10418.36	STX12	23673	Q86Y82	0.84946	0.00150129	0.041902
MATN3.19361.78	MATN3	4148	O15232	0.810091	0.00158608	0.0440226
LEMD1.8040.9	LEMD1	93273	Q68G75	0.680052	0.00162423	0.0445968
ATOX1.19233.75	ATOX1	475	O00244	1.04396	0.00163178	0.0445968
LAYN.2635.61	LAYN	143903	Q6UX15	0.476386	0.00163355	0.0445968
CALCOCO2.12534.10	CALCOCO2		Q13137	0.425961	0.00165286	0.0448788
SRA1.18220.141	SRA1	10011	Q9HD15	0.662326	0.00166806	0.0448908
CD300C.5066.134	CD300C	10871	Q08708	0.776214	0.00167734	0.0448908
ADPGK.6221.1	ADPGK	83440	Q9BRR6	0.400104	0.00168795	0.0448908
GREM1.18878.15	GREM1	26585	O60565	0.916976	0.00168924	0.0448908
EGFR.2677.1	EGFR	1956	P00533	-0.374627	0.0018192	0.0480884
CPLX1.18332.17	CPLX1	10815	O14810	0.678501	0.0018465	0.0485532
ADAMTS6.6441.62	ADAMTS6	11174	Q9UKP5	0.480568	0.00189031	0.0494449
HGF.2681.23	HGF	3082	P14210	1.44008	0.00193801	0.0504287
CHRDL1.3362.61	CHRDL1	91851	Q9BU40	0.684726	0.00205086	0.0530886
CRIP2.9053.16	CRIP2	1397	P52943	0.47031	0.00207994	0.0535639
APP.3171.57	APP	351	P05067	-0.986436	0.00211619	0.0542178
DSG3.16317.20	DSG3	1830	P32926	-1.34496	0.00214036	0.0545574
C1GALT1C1.5735.54	C1GALT1C1	29071	Q96EU7	-0.487164	0.00217763	0.0552
JTB.9038.12	JTB	10899	O76095	0.532839	0.00218767	0.0552
IL18R1.14079.14	IL18R1	8809	Q13478	0.610202	0.00228104	0.0572667
DDOST.17161.1	DDOST	1650	P39656	0.714854	0.00233091	0.0582262
PCSK1N.9391.60	PCSK1N	27344	Q9UHG2	0.54073	0.00237844	0.0591179
TEAD4.12516.13	TEAD4		Q15561	0.333724	0.00239291	0.059183
DLL4.3305.6	DLL4	54567	Q9NR61	0.423365	0.00240556	0.0592028
EPHB4.15530.33	EPHB4	2050	P54760	0.655141	0.00245316	0.0599555
IL6.4673.13	IL6	3569	P05231	1.85285	0.00246231	0.0599555
SPARC.3043.49	SPARC	6678	P09486	-0.975987	0.00247215	0.0599555
MATN2.3325.2	MATN2	4147	O00339	0.499826	0.00249397	0.0601926
CRHBP.6039.24	CRHBP	1393	P24387	0.493394	0.00256013	0.0614924
SPINK4.19213.1	SPINK4	27290	O60575	0.578024	0.00257596	0.0615064
IL1RAPL2.5082.51	IL1RAPL2	26280	Q9NP60	0.319287	0.00260031	0.0615064
CILP.5717.2	CILP	8483	O75339	0.69904	0.0026132	0.0615064
EDAR.2977.7	EDAR	10913	Q9UNE0	0.366351	0.00262759	0.0615064
LOXL3.15427.35	LOXL3	84695	P58215	-0.99114	0.00263149	0.0615064
TNFRSF6B.5070.76	TNFRSF6B	8771	O95407	0.343596	0.00265957	0.0615064
TNFRSF10D.14121.24	TNFRSF10D	8793	Q9UBN6	0.341321	0.00266789	0.0615064
ESM1.3805.16	ESM1	11082	Q9NQ30	0.825251	0.00267106	0.0615064
ERP44.6064.4	ERP44	23071	Q9BS26	-0.934951	0.00268364	0.0615064
CXCL14.5730.60	CXCL14	9547	O95715	0.436016	0.00268383	0.0615064
CRK.4976.57	CRK	1398	P46108	0.684397	0.00269691	0.061524
APOF.12370.30	APOF	319	Q13790	1.00632	0.00271102	0.0615647
DAG1.8369.102	DAG1	1605	Q14118	0.341109	0.00274947	0.0616446
RAP1GAP.13735.1	RAP1GAP		P47736	-0.470843	0.00275268	0.0616446
GCG.4891.50	GCG	2641	P01275	0.868714	0.00275809	0.0616446
IL22.2778.10	IL22	50616	Q9GZX6	0.829875	0.00276389	0.0616446
DGCR2.8055.33	DGCR2	9993	P98153	-0.201328	0.0027995	0.0621613
GDF15.4374.45	GDF15	9518	Q99988	0.921172	0.00287163	0.0634809
BDNF.14047.78	BDNF	627	P23560	-1.34463	0.0029051	0.0639377
VEGFC.3132.1	VEGFC	7424	P49767	0.308225	0.00293243	0.0642563
BOLA1.15370.5	BOLA1	51027	Q9Y3E2	0.508367	0.00295631	0.0642719
CD7.12008.3	CD7	924	P09564	0.741549	0.00295887	0.0642719
ELANE.13671.40	ELANE	1991	P08246	0.610926	0.00303483	0.0656363
CGB2.6213.10	CGB2	114336	Q6NT52	-0.957323	0.00307619	0.0660268
SHC1.5272.55	SHC1	6464	P29353	0.522997	0.00307931	0.0660268
MPZL1.16845.15	MPZL1		O95297	0.182793	0.00310636	0.0662133
ASF1A.18172.71	ASF1A	25842	Q9Y294	0.399274	0.00311451	0.0662133
ARHGAP36.6289.78	ARHGAP36	158763	Q6ZRI8	0.646392	0.00324179	0.068627
ADAMTS5.3168.8	ADAMTS5	11096	Q9UNA0	0.264789	0.00329069	0.0693684
NTN1.6649.51	NTN1	9423	O95631	1.953	0.00333807	0.0700714
CDNF.4962.52	CDNF	441549	Q49AH0	0.482297	0.00335513	0.0701349
LYZ.4920.10	LYZ	4069	P61626	0.958289	0.00342962	0.0712466
UGT2A1.8907.11	UGT2A1	10941	Q9Y4X1	-0.815967	0.0034425	0.0712466
MGP.6520.87	MGP	4256	P08493	0.580266	0.00346183	0.0712466
MSR1.15533.97	MSR1	4481	P21757	0.735195	0.00346536	0.0712466
PFDN2.19243.2	PFDN2	5202	Q9UHV9	0.630457	0.0035161	0.0715984
MOBKL3.19332.1	MOBKL3	25843	Q9Y3A3	-0.267904	0.00352265	0.0715984
WFDC13.9345.436	WFDC13	164237	Q8IUB5	-0.385111	0.00352546	0.0715984
COL4A3BP.13950.9	COL4A3BP	10087	Q9Y5P4	0.597318	0.00358232	0.0719648
PCSK1.13388.57	PCSK1	5122	P29120	0.420803	0.00358845	0.0719648
DLL3.9974.8	DLL3	10683	Q9NYJ7	-0.594214	0.00359533	0.0719648
INHBB.13676.46	INHBB	3625	P09529	0.71194	0.00360112	0.0719648
NCAM1.4498.62	NCAM1	4684	P13591	-0.476234	0.00371943	0.0738391
CCK.6918.183	CCK	885	P06307	0.792466	0.00373766	0.0738391
AGRP.2813.11	AGRP	181	O00253	0.858759	0.00377776	0.0738391
CXCL16.2436.49	CXCL16	58191	Q9H2A7	0.569223	0.00379516	0.0738391
ASB9.19601.15	ASB9	140462	Q96DX5	0.805625	0.0037973	0.0738391
FAAH2.8396.42	FAAH2	158584	Q6GMR7	0.358516	0.00379772	0.0738391
MCL1.10396.6	MCL1	4170	Q07820	0.701697	0.00379837	0.0738391
IL18BP.3073.51	IL18BP	10068	O95998	0.797939	0.00383815	0.0743232
IL15RA.14054.17	IL15RA	3601	Q13261	0.821393	0.00386385	0.0745181
PCSK2.6117.4	PCSK2	5126	P16519	0.591438	0.00387804	0.0745181
PRKCSH.5687.5	PRKCSH	5589	P14314	0.505464	0.00390949	0.074677
RGMB.3331.8	RGMB	285704	Q6NW40	0.488279	0.00392707	0.074677
HSPA1A.16780.6	HSPA1A	3303	P0DMV8	0.654906	0.00393116	0.074677
PSIP1.17176.13	PSIP1	11168	O75475	0.510446	0.00397089	0.0751038
TFF2.9191.8	TFF2	7032	Q03403	0.900332	0.00398369	0.0751038
ADAMTS13.3175.51	ADAMTS13	11093	Q76LX8	-0.535387	0.00405069	0.075651
MAP4K1.8954.30	MAP4K1	11184	Q92918	0.806917	0.00406383	0.075651
AFM.4763.31	AFM	173	P43652	-0.67164	0.00407892	0.075651
VEGFA.19437.61	VEGFA		P15692	-0.858682	0.00409045	0.075651
EDN2.12574.36	EDN2	1907	P20800	0.9182	0.00411193	0.075651
PRTN3.13720.95	PRTN3	5657	P24158	0.726294	0.00411227	0.075651
PDGFD.17140.57	PDGFD	80310	Q9GZP0	-1.42259	0.00414166	0.075651
GDNF.5822.22	GDNF	2668	P39905	0.383059	0.00415096	0.075651
ERH.11614.29	ERH	2079	P84090	0.762404	0.00415409	0.075651
PLA2G2A.2692.74	PLA2G2A	5320	P14555	1.54422	0.00416414	0.075651
RBM39.4284.18	RBM39	9584	Q14498	0.553141	0.00420167	0.0760563
GLRX2.12486.8	GLRX2	51022	Q9NS18	0.355758	0.00425623	0.0767659
TAC1.9337.43	TAC1	6863	P20366	0.609881	0.00427676	0.0768587
CPN2.6415.90	CPN2	1585	P22792	-0.334334	0.0043787	0.0784085
CCL25.2705.5	CCL25	6370	O15444	0.795266	0.00442146	0.0788916
PIANP.9599.6	PIANP	196500	Q8IYJ0	0.803777	0.00447245	0.0795174
ZNF174.11486.26	ZNF174		Q15697	0.246219	0.00467083	0.0825436
GREM2.5598.3	GREM2	64388	Q9H772	0.679241	0.00467733	0.0825436
CALB2.16803.4	CALB2	794	P22676	0.530416	0.00470251	0.0825436
SLPI.4413.3	SLPI	6590	P03973	0.721645	0.00470875	0.0825436
HDGF.16758.96	HDGF	3068	P51858	0.660028	0.00475098	0.0829927
PDYN.19638.9	PDYN		P01213	-0.382959	0.00478554	0.0830418
ID2.15403.53	ID2	3398	Q02363	0.493261	0.00478704	0.0830418
PPBP.16765.52	PPBP	5473	P02775	-0.71999	0.00485307	0.0837466
CCL23.3028.36	CCL23	6368	P55773	0.640727	0.00486119	0.0837466
CEL.9796.4	CEL	1056	P19835	-0.925094	0.00488604	0.0838855
HPSE.5604.30	HPSE	10855	Q9Y251	-1.13832	0.00492997	0.0843498
GMPR.19254.125	GMPR	2766	P36959	-1.66544	0.00516785	0.088118
HSD17B7.8272.22	HSD17B7	51478	P56937	0.365906	0.00520693	0.0882719
LTF.2780.35	LTF	4057	P02788	0.939304	0.00521221	0.0882719
SERPINA7.2706.69	SERPINA7	6906	P05543	-0.326621	0.00527261	0.0887501
TNRC6B.9808.41	TNRC6B	23112	Q9UPQ9	0.407963	0.00528175	0.0887501
TFPI.3336.50	TFPI	7035	P10646	0.523179	0.00531785	0.0887501
APLP1.7210.25	APLP1	333	P51693	-0.640003	0.00531879	0.0887501
C9orf89.7778.104	C9orf89	84270	Q96LW7	0.284767	0.00532927	0.0887501
TGFB3.3520.58	TGFB3	7043	P10600	0.373635	0.00537465	0.0892085
RARRES2.3079.62	RARRES2	5919	Q99969	0.661026	0.00547765	0.090617
HIST1H3A.14146.92	HIST1H3A	8350	P68431	1.01781	0.00550037	0.0906832
HBZ.6919.3	HBZ	3050	P02008	-0.476991	0.00553406	0.0906832
AIF1L.18871.24	AIF1L	83543	Q9BQI0	0.56304	0.0055361	0.0906832
UNC5B.15394.79	UNC5B	219699	Q8IZJ1	0.654049	0.00555759	0.0907377
DNAJB12.8006.12	DNAJB12	54788	Q9NXW2	0.792614	0.0055951	0.0910526
DEFA5.16785.45	DEFA5	1670	Q01523	0.853491	0.00564941	0.0916379
BAGE2.6294.11	BAGE2	85319	Q86Y30	0.682134	0.00575216	0.0929255
PDGFA.4499.21	PDGFA	5154	P04085	-1.11739	0.00576599	0.0929255
IL15RA.3445.53	IL15RA	3601	Q13261	0.496258	0.00582821	0.0934403
FGF19.13724.27	FGF19	9965	O95750	0.878423	0.00584686	0.0934403
IL16.2774.10	IL16	3603	Q14005	0.716163	0.00585405	0.0934403
KIF1C.9899.28	KIF1C	10749	O43896	0.235258	0.00603777	0.0958873
TCEA2.13481.24	TCEA2		Q15560	0.234039	0.00604573	0.0958873
EFNA4.2614.28	EFNA4	1945	P52798	0.64974	0.00611269	0.0966424
PARVA.13434.172	PARVA	55742	Q9NVD7	0.574183	0.00616971	0.0972362
CUL1.17797.1	CUL1	8454	Q13616	0.458274	0.00621999	0.0976577
CHRDL2.6086.15	CHRDL2	25884	Q6WN34	0.615116	0.00623555	0.0976577
LRP11.6713.4	LRP11	84918	Q86VZ4	0.639725	0.00627767	0.0977624
LAMC2.9580.5	LAMC2	3918	Q13753	0.686615	0.00631093	0.0977624
MMP13.4925.54	MMP13	4322	P45452	0.43087	0.00632038	0.0977624
B4GALT7.7806.33	B4GALT7	11285	Q9UBV7	-0.708121	0.00632536	0.0977624
RSPO1.16614.27	RSPO1	284654	Q2MKA7	1.10231	0.00634007	0.0977624
PSMD7.3898.5	PSMD7	5713	P51665	0.288894	0.00641189	0.0985656
CD4.3143.3	CD4	920	P01730	0.472183	0.00651644	0.099734
FAM3D.13102.1	FAM3D	131177	Q96BQ1	0.800294	0.00653181	0.099734
CAPG.4968.50	CAPG	822	P40121	0.964703	0.00654779	0.099734
KLK8.2834.54	KLK8	11202	O60259	0.444098	0.00667881	0.101178
CTRC.5626.20	CTRC	11330	Q99895	-0.435612	0.00669891	0.101178
CHP1.12458.79	CHP1		Q99653	0.459966	0.00671564	0.101178
ITGB2.12750.9	ITGB2	3689	P05107	0.219416	0.0067236	0.101178
KLK7.3378.49	KLK7	5650	P49862	-0.496277	0.00676708	0.101292
ITGB7.11205.10	ITGB7	3695	P26010	0.630075	0.00677513	0.101292
BMP10.3587.53	BMP10	27302	O95393	0.490472	0.00679197	0.101292
RNASE4.5644.60	RNASE4	6038	P34096	0.478241	0.0068264	0.101389
IL1RL1.4234.8	IL1RL1	9173	Q01638	1.28828	0.0068566	0.101389
THBS2.3339.33	THBS2	7058	P35442	0.982207	0.0068594	0.101389
NPPA.5443.62	NPPA	4878	P01160	0.451243	0.00692741	0.102092
GLIPR2.15522.2	GLIPR2	152007	Q9H4G4	-0.54882	0.00703666	0.103398
PF4V1.5663.18	PF4V1	5197	P10720	-0.248353	0.0071438	0.104664
IFNA8.6214.84	IFNA8	3445	P32881	-0.28776	0.00718992	0.105032
DNASE1L2.6324.11	DNASE1L2	1775	Q92874	0.788792	0.007232	0.105338
FAM150B.6284.7	FAM150B	285016	Q6UX46	0.572378	0.00728931	0.105864
FGFRL1.6237.11	FGFRL1	53834	Q8N441	1.13291	0.00733954	0.106285
PPBP.17165.1	PPBP	5473	P02775	-1.15854	0.00753467	0.108795
MAGI2.14066.49	MAGI2		Q86UL8	0.401745	0.00758836	0.109255
UBTD2.12875.28	UBTD2		Q8WUN7	0.314544	0.0076207	0.109405
PIANP.14114.18	PIANP	196500	Q8IYJ0	0.576849	0.00780715	0.111194
SMOC1.13118.5	SMOC1	64093	Q9H4F8	1.0612	0.00782644	0.111194
IGFBP6.14088.38	IGFBP6	3489	P24592	0.358543	0.00783028	0.111194
FAM159A.13431.74	FAM159A		Q6UWV7	0.870334	0.00784877	0.111194
CHST6.4429.51	CHST6	4166	Q9GZX3	0.387045	0.00785661	0.111194
HSPA1A.6563.78	HSPA1A	3303	P0DMV8	0.767627	0.00794107	0.11184
SH2D3C.12704.26	SH2D3C	10044	Q8N5H7	-0.257934	0.00796134	0.11184
NUCB1.10451.11	NUCB1	4924	Q02818	0.769873	0.00796938	0.11184
SPON1.4297.62	SPON1	10418	Q9HCB6	0.645676	0.00806929	0.112925
PTGDS.10514.5	PTGDS	5730	P41222	0.65515	0.00812677	0.113412
MAPK12.5005.4	MAPK12	6300	P53778	0.180624	0.00817749	0.11346
PEA15.18833.76	PEA15	8682	Q15121	0.516236	0.00819316	0.11346
CPQ.9394.19	CPQ	10404	Q9Y646	-0.6028	0.00820506	0.11346
TRA2B.12373.73	TRA2B	6434	P62995	0.743894	0.00822109	0.11346
MEPE.3209.69	MEPE	56955	Q9NQ76	0.264506	0.00827159	0.113843
MAD2L1.15313.28	MAD2L1	4085	Q13257	0.268963	0.00835185	0.114631
PRLR.5114.65	PRLR	5618	P16471	0.185551	0.00845372	0.115712
USP21.12681.63	USP21		Q9UK80	-0.295198	0.00875035	0.119445
CTSZ.4971.1	CTSZ	1522	Q9UBR2	0.480182	0.00884992	0.120475
FAM162A.6531.29	FAM162A	26355	Q96A26	0.324152	0.00889751	0.120591
APOL1.9506.10	APOL1	8542	O14791	-0.452746	0.00893039	0.120591
STOML2.6555.58	STOML2	30968	Q9UJZ1	-0.336668	0.00893089	0.120591
PABPC3.10447.18	PABPC3	5042	Q9H361	0.475735	0.00897247	0.120826
HLA.G.19636.23	HLA-G	3135	P17693	0.345012	0.00901198	0.121032
ITIH2.9326.33	ITIH2	3698	P19823	-0.416328	0.00909736	0.121851
CD274.5060.62	CD274	29126	Q9NZQ7	0.556036	0.00913552	0.122035
GLA.15588.17	GLA	2717	P06280	0.389932	0.00923382	0.123019
GGPS1.17786.5	GGPS1	9453	O95749	0.313382	0.00928397	0.123358
SERPINC1.3344.60	SERPINC1	462	P01008	-0.288195	0.0094207	0.124843
PFKM.17384.110	PFKM	5213	P08237	-0.422699	0.00944878	0.124884
ADAMTS1.3174.2	ADAMTS1	9510	Q9UHI8	0.374791	0.00947903	0.124953
KIT.2475.1	KIT	3815	P10721	-0.539433	0.00959891	0.1262
PFDN1.19242.21	PFDN1	5201	O60925	0.294676	0.00984668	0.128533
DYNLT1.14331.262	DYNLT1		P63172	-0.318744	0.00984769	0.128533
RFXAP.12726.3	RFXAP		O00287	0.204291	0.00985352	0.128533
RBP1.19279.42	RBP1	5947	P09455	0.478582	0.0100484	0.130733
IGFBPL1.7815.49	IGFBPL1	347252	Q8WX77	0.153575	0.0100884	0.130914
HSPA1A.7219.152	HSPA1A	3303	P0DMV8	0.61596	0.01019	0.13189
HDHD2.13472.35	HDHD2	84064	Q9H0R4	-0.649129	0.0103147	0.133159
UNC5B.7776.20	UNC5B	219699	Q8IZJ1	0.649115	0.0103467	0.133227
ANGPTL1.11142.11	ANGPTL1	9068	O95841	0.474099	0.0103999	0.133439
TSSC4.18181.2	TSSC4	10078	Q9Y5U2	0.552575	0.0104166	0.133439
NETO2.10562.42	NETO2	81831	Q8NC67	0.593855	0.0105525	0.134834
C1QTNF1.6304.8	C1QTNF1	114897	Q9BXJ1	0.403359	0.0106069	0.135184
CADM3.3630.27	CADM3	57863	Q8N126	0.30573	0.0107537	0.136707
ANGPT1.2811.27	ANGPT1	284	Q15389	-0.999333	0.0107844	0.136748
MAP1LC3A.17781.191	MAP1LC3A	84557	Q9H492	0.503006	0.0108211	0.136866
TUFT1.5690.49	TUFT1	7286	Q9NNX1	-0.342392	0.0109716	0.138298
IL13RA1.2633.52	IL13RA1	3597	P78552	0.505914	0.0110167	0.138298
MFAP4.5636.10	MFAP4	4239	P55083	1.00333	0.0110302	0.138298
S100A2.11969.5	S100A2	6273	P29034	0.43204	0.0110695	0.138298
PPP1R3B.12768.3	PPP1R3B		Q86XI6	-0.661664	0.0110737	0.138298
RRAGC.12548.75	RRAGC		Q9HB90	-0.276728	0.0111004	0.138298
SPON2.8099.42	SPON2	10417	Q9BUD6	0.716283	0.0113662	0.140924
NCAN.15573.110	NCAN	1463	O14594	-0.661197	0.0113751	0.140924
LRRC25.9317.4	LRRC25	126364	Q8N386	-0.456709	0.0113958	0.140924
GPC2.3315.15	GPC2	221914	Q8N158	0.268674	0.0115053	0.141927
ST6GAL1.6035.2	ST6GAL1	6480	P15907	0.286619	0.0116142	0.142573
B4GALT3.6921.24	B4GALT3	8703	O60512	0.252022	0.0116516	0.142573
ARSB.3172.28	ARSB	411	P15848	0.582765	0.0116905	0.142573
RPN1.6458.6	RPN1	6184	P04843	0.863801	0.0116917	0.142573
PRPS2.18329.4	PRPS2	5634	P11908	-0.484877	0.0117185	0.142573
COLGALT2.7234.12	COLGALT2	23127	Q8IYK4	0.183399	0.0117289	0.142573
HAMP.3504.58	HAMP	57817	P81172	1.11593	0.0117924	0.142898
JMJD6.18322.15	JMJD6	23210	Q6NYC1	-0.305246	0.0118214	0.142898
FCN2.3313.21	FCN2	2220	Q15485	-0.72919	0.0118415	0.142898
KLHL13.12463.7	KLHL13		Q9P2N7	0.410103	0.0118704	0.142903
PUF60.10575.31	PUF60	22827	Q9UHX1	0.538204	0.0119909	0.143133
LBP.3074.6	LBP	3929	P18428	0.36251	0.0120365	0.143133
FSTL1.13112.179	FSTL1	11167	Q12841	0.35575	0.0120953	0.143133
GLRX.18386.36	GLRX	2745	P35754	0.411585	0.0121003	0.143133
FBP1.7206.20	FBP1	2203	P09467	-1.03184	0.0121095	0.143133
YES1.2878.66	YES1	7525	P07947	0.312563	0.0121414	0.143133
ABHD14A.5715.4	ABHD14A	25864	Q9BUJ0	0.583218	0.0121641	0.143133
SPINK7.10974.20	SPINK7	84651	P58062	0.71289	0.0121665	0.143133
MYDGF.9248.36	MYDGF	56005	Q969H8	0.279873	0.0121921	0.143133
CD14.8969.49	CD14	929	P08571	0.456199	0.0122051	0.143133
ADAMTS4.2809.25	ADAMTS4	9507	O75173	0.250633	0.0122193	0.143133
SLC26A7.13979.3	SLC26A7		Q8TE54	0.477699	0.0122333	0.143133
STAU1.12471.47	STAU1	6780	O95793	0.405669	0.012323	0.143845
CCL24.4128.27	CCL24	6369	O00175	0.402973	0.012453	0.144012
OSCAR.7116.31	OSCAR	126014	Q8IYS5	-0.172442	0.0124733	0.144012
TNFRSF11B.8304.50	TNFRSF11B	4982	O00300	0.65549	0.0124847	0.144012
GPC5.4991.12	GPC5	2262	P78333	-0.324784	0.0124885	0.144012
LTBP4.13133.73	LTBP4	8425	Q8N2S1	0.55421	0.0124931	0.144012
PRSS3.18864.7	PRSS3	5646	P35030	0.876549	0.0125102	0.144012
RAC2.18950.13	RAC2	5880	P15153	-0.765891	0.0126205	0.144847
FIGF.13098.93	FIGF	2277	O43915	0.677648	0.0126408	0.144847
POMC.2558.51	POMC	5443	P01189	0.192443	0.0127801	0.146055
TESC.12831.21	TESC	54997	Q96BS2	0.401211	0.0128046	0.146055
PLA2G16.7865.126	PLA2G16	11145	P53816	0.533938	0.0128343	0.14606
MAFG.19281.86	MAFG	4097	O15525	0.594051	0.0128923	0.146141
PNP.15435.4	PNP	4860	P00491	-0.701337	0.0129	0.146141
MDM1.7898.29	MDM1	56890	Q8TC05	0.401088	0.0129681	0.146465
ZNF843.8321.27	ZNF843	283933	Q8N446	0.227841	0.0129872	0.146465
IMPA2.12581.39	IMPA2	3613	O14732	-0.36745	0.0130382	0.146616
LAMA2.LAMB1.LAMC1.18347.15	LAMA2 LAMB1 LAMC1		P24043 P07942 P11047	0.474475	0.0130593	0.146616
BPIFA2.16302.11	BPIFA2	140683	Q96DR5	-0.320202	0.0130966	0.146705
NCR3.3003.29	NCR3	259197	O14931	0.242123	0.0132729	0.148033
CCL5.5480.49	CCL5	6352	P13501	-1.33881	0.0132885	0.148033
CPN1.7142.5	CPN1	1584	P15169	0.18339	0.013304	0.148033
PPBP.4544.4	PPBP	5473	P02775	-1.17687	0.0134251	0.148952
EIF2B1.10080.9	EIF2B1	1967	Q14232	-0.731027	0.0134702	0.148952
PPBP.2790.54	PPBP	5473	P02775	-1.17762	0.0135052	0.148952
PRSS8.15513.108	PRSS8	5652	Q16651	0.302697	0.0135058	0.148952
CLPSL1.9526.3	CLPSL1	340204	A2RUU4	0.683334	0.0135632	0.149132
ALDOB.18185.118	ALDOB	229	P05062	-0.888676	0.0136159	0.149132
SIRPB2.5669.26	SIRPB2	284759	Q5JXA9	0.468198	0.0136227	0.149132
GOLM1.17456.53	GOLM1	51280	Q8NBJ4	0.772473	0.0136416	0.149132
CA6.3352.80	CA6	765	P23280	-0.83269	0.0137513	0.150003
PGRMC2.10506.53	PGRMC2	10424	O15173	0.320544	0.0138782	0.150858
RPLP2.10949.59	RPLP2	6181	P05387	0.290385	0.01389	0.150858
SERPINB1.10737.96	SERPINB1	1992	P30740	0.517932	0.0139784	0.151455
FETUB.3367.8	FETUB	26998	Q9UGM5	-0.656958	0.0140157	0.151455
CILP2.8841.65	CILP2	148113	Q8IUL8	-0.450126	0.0140471	0.151455
FAM19A5.5609.92	FAM19A5	25817	Q7Z5A7	0.1964	0.0140663	0.151455
FAHD1.17819.30	FAHD1	81889	Q6P587	-0.908821	0.014242	0.152859
BID.5798.3	BID	637	P55957	0.409603	0.0142579	0.152859
GLCE.7808.5	GLCE	26035	O94923	-0.368	0.0143251	0.153197
NXPH1.4562.1	NXPH1	30010	P58417	-0.724767	0.0143508	0.153197
MYL6B.14227.21	MYL6B	140465	P14649	0.847707	0.0144623	0.15404
TENM3.11107.25	TENM3	55714	Q9P273	0.144564	0.0145417	0.15404
COL2A1.18875.125	COL2A1	1280	P02458	-0.721358	0.0145666	0.15404
ART4.6576.1	ART4	420	Q93070	0.496346	0.0145815	0.15404
BAG3.10078.5	BAG3	9531	O95817	0.216861	0.0146004	0.15404
FAM20B.7198.197	FAM20B	9917	O75063	-0.318838	0.0146147	0.15404
CSH1.CSH2.13103.125	CSH1 CSH2	1442 1443	P0DML2 P0DML3	-0.272828	0.0146969	0.154511
DLK1.6496.60	DLK1	8788	P80370	0.657073	0.0147212	0.154511
NXT1.9942.2	NXT1	29107	Q9UKK6	0.530282	0.0148132	0.155064
TF.4162.54	TF	7018	P02787	-0.220037	0.014836	0.155064
TMEFF1.15641.20	TMEFF1	8577	Q8IYR6	0.304184	0.0149114	0.155526
FIBP.19169.88	FIBP	9158	O43427	-0.61365	0.0150011	0.155928
ST8SIA4.7038.45	ST8SIA4	7903	Q92187	0.820349	0.0150123	0.155928
DLK1.6373.54	DLK1	8788	P80370	0.692067	0.01507	0.156203
VWA1.6385.63	VWA1	64856	Q6PCB0	0.553355	0.0152426	0.157664
FGFBP3.11219.95	FGFBP3	143282	Q8TAT2	0.567723	0.0153661	0.158614
HDGFRP3.18899.82	HDGFRP3	50810	Q9Y3E1	0.704323	0.0154093	0.158669
PCMT1.18160.2	PCMT1	5110	P22061	-0.161973	0.0154377	0.158669
DLK2.9359.9	DLK2	65989	Q6UY11	0.659604	0.015483	0.158669
DEPP.7178.59	DEPP	11067	Q9NTK1	-0.608995	0.0154985	0.158669
LONP1.6398.12	LONP1	9361	P36776	0.559541	0.015728	0.16012
THSD7A.11174.8	THSD7A	221981	Q9UPZ6	-0.39729	0.0157285	0.16012
SYT11.7089.42	SYT11	23208	Q9BT88	-0.366681	0.0157364	0.16012
ERLIN1.8776.10	ERLIN1	10613	O75477	0.162005	0.0158255	0.160699
UNC5C.5139.32	UNC5C	8633	O95185	0.471981	0.0159847	0.161987
SHANK3.13242.134	SHANK3		Q9BYB0	0.529118	0.0160706	0.162407
BMP7.2972.57	BMP7	655	P18075	0.432749	0.0160911	0.162407
SNRPD2.17823.40	SNRPD2	6633	P62316	0.509727	0.0161626	0.162613
PPA2.18307.71	PPA2	27068	Q9H2U2	-0.223176	0.0161766	0.162613
HDHD3.19482.11	HDHD3	81932	Q9BSH5	0.299579	0.0162321	0.162842
RSPO4.8464.31	RSPO4	343637	Q2I0M5	0.321052	0.0163686	0.163806
CLIC5.12475.48	CLIC5		Q9NZA1	-0.825408	0.0163937	0.163806
CNEP1R1.13532.25	CNEP1R1		Q8N9A8	0.418183	0.0164381	0.163922
HIBADH.4693.72	HIBADH	11112	P31937	-0.204353	0.0165474	0.164564
AMIGO1.9979.13	AMIGO1	57463	Q86WK6	-1.08535	0.016582	0.164564
TCP1.19265.9	TCP1	6950	P17987	-0.761954	0.0166385	0.164564
RAMP3.15437.11	RAMP3	10268	O60896	0.215976	0.0166427	0.164564
STX7.8274.64	STX7	8417	O15400	0.575552	0.0166927	0.164564
THBS1.3474.19	THBS1	7057	P07996	-1.0117	0.0167002	0.164564
SVEP1.11109.56	SVEP1	79987	Q4LDE5	0.9563	0.016751	0.16474
PPP2R1A.12621.55	PPP2R1A	5518	P30153	-0.479061	0.0170566	0.167417
S100A12.5852.6	S100A12	6283	P80511	0.782965	0.0175088	0.171394
RSRP1.9050.170	RSRP1	57035	Q9BUV0	-0.116661	0.01754	0.171394
HTRA1.15594.47	HTRA1	5654	Q92743	0.369694	0.0175648	0.171394
RBP5.19241.31	RBP5	83758	P82980	0.709446	0.0176906	0.172031
PLA2G1B.4910.21	PLA2G1B	5319	P04054	0.578164	0.017699	0.172031
FURIN.6276.16	FURIN	5045	P09958	0.621523	0.0177668	0.172355
PIGR.3216.2	PIGR	5284	P01833	0.803885	0.0178704	0.173024
SVEP1.11178.21	SVEP1	79987	Q4LDE5	0.935985	0.017924	0.173207
GLRX5.16597.11	GLRX5	51218	Q86SX6	0.801188	0.0184205	0.177427
CXCL10.4141.79	CXCL10	3627	P02778	1.10483	0.0184316	0.177427
GRN.4992.49	GRN	2896	P28799	0.384652	0.0185424	0.177817
TLR4.11101.18	TLR4	7099	O00206	0.473132	0.0185434	0.177817
VIT.6234.74	VIT	5212	Q6UXI7	0.543375	0.0187541	0.179001
ACPP.19317.114	ACPP	55	P15309	0.194862	0.0187654	0.179001
PGLYRP1.3329.14	PGLYRP1	8993	O75594	0.761108	0.0187743	0.179001
MGAT2.6909.40	MGAT2	4247	Q10469	-0.202941	0.0188744	0.179346
GALNT1.7090.17	GALNT1	2589	Q10472	0.255879	0.0188823	0.179346
HMOX2.2622.18	HMOX2	3163	P30519	0.336844	0.0190205	0.180316
DPY30.13943.38	DPY30		Q9C005	0.864353	0.0190613	0.180361
MPO.2580.83	MPO	4353	P05164	0.479267	0.0191575	0.180912
CCT7.13673.21	CCT7	10574	Q99832	-1.00493	0.0192393	0.180912
ANPEP.15457.14	ANPEP	290	P15144	0.395268	0.019254	0.180912
RSPO2.8409.3	RSPO2	340419	Q6UXX9	0.311226	0.0192645	0.180912
DNAJB9.11214.40	DNAJB9		Q9UBS3	0.64094	0.0193362	0.181188
CLN5.8874.53	CLN5	1203	O75503	0.160601	0.0194209	0.181188
GPD1.13697.51	GPD1	2819	P21695	-0.967547	0.0194363	0.181188
CAND1.13937.75	CAND1	55832	Q86VP6	-0.482342	0.0194389	0.181188
MZF1.14662.6	MZF1		P28698	-0.521296	0.0196198	0.181828
SIGLEC15.10847.1	SIGLEC15	284266	Q6ZMC9	0.174353	0.0196538	0.181828
DYNLL1.3881.49	DYNLL1	8655	P63167	0.228677	0.0196665	0.181828
BCAR3.12634.79	BCAR3	8412	O75815	-0.286327	0.0196694	0.181828
GPX1.15591.28	GPX1	2876	P07203	-0.513637	0.0196895	0.181828
NPPB.3723.1	NPPB	4879	P16860	0.173157	0.0198311	0.182604
GLTP.12513.8	GLTP	51228	Q9NZD2	0.204948	0.0198513	0.182604
VAV3.9830.109	VAV3	10451	Q9UKW4	-0.393409	0.0199115	0.182604
RBM19.11468.15	RBM19		Q9Y4C8	0.646794	0.0199598	0.182604
AK1.5012.67	AK1	203	P00568	-0.688151	0.0199755	0.182604
RELT.14112.40	RELT	84957	Q969Z4	0.270527	0.0200222	0.182604
CLTA.19257.11	CLTA	1211	P09496	0.522865	0.0200294	0.182604
PGR.15693.9	PGR	5241	P06401	0.549581	0.0200904	0.182827
FLT1.16315.105	FLT1	2321	P17948	0.383527	0.0201569	0.183098
FCGR1A.3312.64	FCGR1A	2209	P12314	0.474438	0.0203467	0.184211
DEAF1.6369.82	DEAF1	10522	O75398	-0.220965	0.0203855	0.184211
CLSTN1.15521.4	CLSTN1	22883	O94985	-0.350708	0.0203901	0.184211
SYT4.17355.56	SYT4		Q9H2B2	-0.322599	0.0204839	0.184725
CSNK2A2.CSNK2B.5226.36	CSNK2A2 CSNK2B	1459 1460	P19784 P67870	-0.775845	0.0205632	0.184784
ABL1.3341.33	ABL1	25	P00519	0.240415	0.0205645	0.184784
PRKG1.13067.5	PRKG1	5592	Q13976	-0.239476	0.0206344	0.185064
IL21R.9366.54	IL21R	50615	Q9HBE5	0.422851	0.0206697	0.185064
REN.3396.54	REN	5972	P00797	0.870047	0.0208064	0.185702
ASAH2.3212.30	ASAH2	56624	Q9NR71	-0.359128	0.0208153	0.185702
CD99L2.10539.30	CD99L2	83692	Q8TCZ2	-0.156221	0.0208603	0.185772
USP14.19189.2	USP14	9097	P54578	-0.537357	0.0210448	0.18701
MAGEA10.13610.9	MAGEA10	4109	P43363	-0.469893	0.0210742	0.18701
ADH6.18206.18	ADH6	130	P28332	-0.598454	0.02118	0.187365
DLL1.5349.69	DLL1	28514	O00548	0.459956	0.021201	0.187365
ST3GAL6.6947.4	ST3GAL6	10402	Q9Y274	-0.448245	0.0212267	0.187365
GPT.16015.19	GPT	2875	P24298	-0.745201	0.0213303	0.187948
DNAJC11.9783.75	DNAJC11	55735	Q9NVH1	0.234854	0.0214829	0.188959
COL3A1.18880.81	COL3A1	1281	P02461	0.387994	0.0215458	0.189179
PDGFB.4149.8	PDGFB	5155	P01127	-1.31014	0.0217138	0.190227
FJX1.7921.65	FJX1	24147	Q86VR8	0.532145	0.0217413	0.190227
PRPSAP2.19150.20	PRPSAP2	5636	O60256	-0.508827	0.0220047	0.192006
GALP.9398.30	GALP	85569	Q9UBC7	-0.251952	0.0220215	0.192006
NRK1.16853.5	NRK1	54981	Q9NWW6	-0.267998	0.022096	0.192238
DKK1.3535.84	DKK1	22943	O94907	-0.777778	0.022125	0.192238
FBLN5.15585.304	FBLN5	10516	Q9UBX5	0.409108	0.0222316	0.192829
HSPA1B.18901.26	HSPA1B	3304	P0DMV9	0.539406	0.0225086	0.194892
SERPINA5.3389.7	SERPINA5	5104	P05154	-0.74274	0.0225951	0.195303
CPD.7917.17	CPD	1362	O75976	0.232317	0.0227942	0.196472
SLITRK4.7139.14	SLITRK4	139065	Q8IW52	0.499573	0.022809	0.196472
KRT7.11383.41	KRT7	3855	P08729	0.68946	0.0228746	0.196675
ATAD2.13043.157	ATAD2	29028	Q6PL18	-0.227005	0.0229113	0.196675
BRPF1.11671.19	BRPF1		P55201	0.22548	0.0233729	0.200293
CDH3.2643.57	CDH3	1001	P22223	-0.418606	0.0234141	0.200303
KIAA0319L.13698.28	KIAA0319L		Q8IZA0	0.265157	0.0237454	0.202523
MSRB2.16877.19	MSRB2		Q9Y3D2	0.174215	0.0237694	0.202523
TNFRSF4.3730.81	TNFRSF4	7293	P43489	0.219687	0.0237952	0.202523
DLX3.11422.2	DLX3		O60479	-0.262427	0.0239626	0.20329
TAF15.16865.62	TAF15	8148	Q92804	0.552388	0.0239668	0.20329
IL2.3070.1	IL2	3558	P60568	0.277452	0.0240395	0.203553
CSF1.3738.54	CSF1	1435	P09603	0.42596	0.0240792	0.203553
LMOD1.12504.26	LMOD1	25802	P29536	0.466489	0.0243235	0.205271
LILRA5.8766.29	LILRA5	353514	A6NI73	0.584364	0.0245233	0.206608
TKT.4306.4	TKT	7086	P29401	-0.521371	0.0245941	0.206855
EFEMP1.8480.29	EFEMP1	2202	Q12805	0.510508	0.0246645	0.207099
ZNRF3.14122.132	ZNRF3	84133	Q9ULT6	-0.307881	0.0249754	0.20822
ANXA8.18290.6	ANXA8	653145	P13928	0.223041	0.0249939	0.20822
SEMA4D.5737.61	SEMA4D	10507	Q92854	-0.401719	0.0250072	0.20822
G3BP1.19266.35	G3BP1	10146	Q13283	0.356107	0.0250263	0.20822
PUS1.11201.19	PUS1		Q9Y606	-0.25765	0.0250434	0.20822
UBE2D2.18842.24	UBE2D2	7322	P62837	-0.23485	0.0250633	0.20822
TNS2.11667.29	TNS2		Q63HR2	0.235422	0.0250897	0.20822
CFP.2960.66	CFP	5199	P27918	-0.403308	0.0251343	0.208244
PTH.5954.62	PTH	5741	P01270	0.684054	0.0252905	0.209191
FABP1.11516.7	FABP1	2168	P07148	0.414114	0.0253479	0.209319
CCL20.2468.62	CCL20	6364	P78556	0.304672	0.0255469	0.210614
FOXL2.11375.49	FOXL2		P58012	-0.222796	0.0255938	0.210653
COPE.19310.81	COPE	11316	O14579	-0.575389	0.0257903	0.211922
AHSG.3581.53	AHSG	197	P02765	-0.327985	0.0258409	0.211989
PVRL4.5734.13	PVRL4	81607	Q96NY8	0.296659	0.0261644	0.214221
CD200.5112.73	CD200	4345	P41217	0.188334	0.0262309	0.214221
DCTN2.5879.51	DCTN2	10540	Q13561	0.312368	0.0262417	0.214221
RAB5A.17205.21	RAB5A	5868	P20339	-0.584688	0.026552	0.216401
HSPG2.15626.223	HSPG2	3339	P98160	0.421691	0.0266509	0.216854
SLIT1.15634.139	SLIT1	6585	O75093	0.145093	0.0267384	0.217211
MEF2C.8933.84	MEF2C	4208	Q06413	0.174365	0.0268739	0.217634
TDGF1.5810.25	TDGF1	6997	P13385	1.00392	0.0268776	0.217634
ROBO3.5117.14	ROBO3	64221	Q96MS0	0.173014	0.0270522	0.218284
OLFM3.11143.32	OLFM3	118427	Q96PB7	-0.459874	0.0270684	0.218284
TARBP2.12781.2	TARBP2	6895	Q15633	0.238584	0.0271142	0.218284
ESAM.7841.84	ESAM	90952	Q96AP7	0.419007	0.0271347	0.218284
CCL14.2900.53	CCL14	6358	Q16627	0.594761	0.0271763	0.218284
LILRA4.8299.66	LILRA4	23547	P59901	-0.326181	0.0272485	0.218512
PLAU.4158.54	PLAU	5328	P00749	0.32149	0.0273158	0.218702
PRR27.9607.39	PRR27	401137	Q6MZM9	-0.16833	0.0273746	0.218822
CSNK2B.11330.15	CSNK2B	1460	P67870	-0.388315	0.0276236	0.22046
KLKB1.4152.58	KLKB1	3818	P03952	-0.364553	0.0277213	0.220886
DCXR.17758.79	DCXR	51181	Q7Z4W1	-0.712861	0.0279446	0.222311
PROK2.10754.113	PROK2	60675	Q9HC23	0.847191	0.0279931	0.222342
TNC.4155.3	TNC	3371	P24821	0.585286	0.028062	0.222536
OTC.15431.31	OTC	5009	P00480	-1.12211	0.0284449	0.22491
XRCC4.9886.28	XRCC4	7518	Q13426	0.394174	0.0284514	0.22491
HAGH.19267.14	HAGH	3029	Q16775	-0.509537	0.0285762	0.22526
CD209.3029.52	CD209	30835	Q9NNX6	0.48667	0.0286425	0.22526
ITPA.18916.25	ITPA	3704	Q9BY32	-0.514196	0.0286657	0.22526
CD79B.6351.55	CD79B	974	P40259	0.155745	0.0286822	0.22526
RAB5C.14287.6	RAB5C	5878	P51148	-0.510511	0.0287211	0.22526
IGSF8.6984.6	IGSF8	93185	Q969P0	0.306504	0.0288252	0.225722
NUDT9.9482.110	NUDT9	53343	Q9BW91	0.435045	0.0290051	0.226775
ERN1.11229.16	ERN1	2081	O75460	-0.377354	0.0290919	0.226891
ACAA1.17782.23	ACAA1	30	P09110	-0.727288	0.0291107	0.226891
SERPINB8.19130.81	SERPINB8	5271	P50452	0.521795	0.0298898	0.232601
CTSF.9212.22	CTSF	8722	Q9UBX1	-0.314927	0.029982	0.232955
GNS.3616.3	GNS	2799	P15586	0.322366	0.0300937	0.233107
CFL1.4203.50	CFL1	1072	P23528	-0.341761	0.0301431	0.233107
ALB.18380.78	ALB	213	P02768	-0.251484	0.0301817	0.233107
VASN.5682.13	VASN	114990	Q6EMK4	0.305619	0.0302291	0.233107
GSTM4.18895.54	GSTM4	2948	Q03013	-0.653947	0.0302349	0.233107
CNN1.15566.10	CNN1	1264	P51911	0.289348	0.0302895	0.233168
NOTCH2.5106.52	NOTCH2	4853	Q04721	-0.355302	0.0304065	0.233381
NANS.17802.4	NANS	54187	Q9NR45	-0.395551	0.0304105	0.233381
APOM.10445.20	APOM	55937	O95445	-0.388187	0.0304797	0.233405
HS6ST1.5465.32	HS6ST1	9394	O60243	0.348638	0.0305071	0.233405
TNFRSF13B.2704.74	TNFRSF13B	23495	O14836	0.341267	0.0305672	0.233507
GAS1.5463.22	GAS1	2619	P54826	0.504227	0.0307182	0.233758
PON1.4261.55	PON1	5444	P27169	0.210212	0.0307477	0.233758
NUDT5.17761.2	NUDT5	11164	Q9UKK9	0.473979	0.0307506	0.233758
STX4.10668.5	STX4	6810	Q12846	0.530754	0.0307871	0.233758
PEF1.19272.9	PEF1	553115	Q9UBV8	-0.338352	0.0308816	0.234119
RNASE2.8394.56	RNASE2	6036	P10153	0.266541	0.0312301	0.235972
AMIGO2.14134.49	AMIGO2	347902	Q86SJ2	0.423011	0.0312579	0.235972
NRG4.14139.16	NRG4	145957	Q8WWG1	0.483698	0.0312677	0.235972
FANCL.10063.10	FANCL	55120	Q9NW38	0.131581	0.0313949	0.236574
EIF3G.11454.87	EIF3G	8666	O75821	0.441349	0.0315511	0.237349
NLGN1.15620.4	NLGN1	22871	Q8N2Q7	0.362066	0.031594	0.237349
LRTM1.9368.64	LRTM1	57408	Q9HBL6	0.124341	0.0316856	0.237349
MUC1.10623.19	MUC1	4582	P15941	0.805177	0.0316877	0.237349
MCTS1.12488.9	MCTS1	28985	Q9ULC4	-0.467619	0.0317429	0.237407
PSPN.2696.87	PSPN	5623	O60542	0.240835	0.0321496	0.240089
KIAA0040.14603.51	KIAA0040		J3QR46	0.346771	0.032205	0.240143
GMPR2.19446.1	GMPR2	51292	Q9P2T1	-0.348252	0.0323633	0.240965
CCT5.12569.25	CCT5	22948	P48643	-0.574642	0.0324608	0.241136
KEL.7070.25	KEL	3792	P23276	0.243747	0.0324829	0.241136
CD74.6974.6	CD74	972	P04233	-0.126993	0.0327349	0.242646
SEMA3B.5667.3	SEMA3B	7869	Q13214	0.281888	0.0331776	0.245563
SNRPG.19276.124	SNRPG	6637	P62308	0.454336	0.0333706	0.246299
PREP.14273.19	PREP	5550	P48147	-0.413229	0.0334261	0.246299
ANAPC10.12345.4	ANAPC10	10393	Q9UM13	0.227659	0.0335129	0.246299
CNTN1.2974.61	CNTN1	1272	Q12860	-0.44251	0.0335185	0.246299
COL6A2.16753.46	COL6A2	1292	P12110	0.212384	0.0335235	0.246299
TNFRSF8.2605.49	TNFRSF8	943	P28908	0.377669	0.0335735	0.246304
ANGPTL3.10391.1	ANGPTL3	27329	Q9Y5C1	0.489479	0.0337361	0.246826
HTN1.10608.9	HTN1	3346	P15515	0.548336	0.0337434	0.246826
GLRX3.16596.25	GLRX3	10539	O76003	-0.510352	0.034015	0.248159
MDH1.3853.56	MDH1	4190	P40925	-0.493846	0.034025	0.248159
G3BP2.9831.12	G3BP2	9908	Q9UN86	0.475571	0.0343094	0.249672
FOLH1.5478.50	FOLH1	2346	Q04609	0.269935	0.0344036	0.249672
IL11.4493.92	IL11	3589	P20809	0.237507	0.0344218	0.249672
KDR.3651.50	KDR	3791	P35968	-0.315671	0.0344324	0.249672
PPA1.5021.13	PPA1	5464	Q15181	-0.380816	0.0347551	0.251251
DKKL1.16309.30	DKKL1	27120	Q9UK85	0.303185	0.0348006	0.251251
TMEM132D.13416.8	TMEM132D		Q14C87	-0.488314	0.034801	0.251251
CTSB.8007.19	CTSB	1508	P07858	0.577173	0.034903	0.251624
TPI1.4309.59	TPI1	7167	P60174	-0.537979	0.0349663	0.251708
IGFBP7.3320.49	IGFBP7	3490	Q16270	0.31247	0.0350154	0.251708
NTF4.4146.58	NTF4	4909	P34130	0.238333	0.0352532	0.252734
ARF4.18408.26	ARF4	378	P18085	-0.562027	0.0352781	0.252734
NR3C2.12931.16	NR3C2	4306	P08235	0.749383	0.0353099	0.252734
CD248.15491.20	CD248	57124	Q9HCU0	0.47489	0.0353881	0.252931
VHL.17362.5	VHL	7428	P40337	-0.428798	0.0354699	0.253153
COL11A2.11278.4	COL11A2	1302	P13942	-0.541421	0.0355947	0.253343
RIPK2.8993.151	RIPK2	8767	O43353	0.226463	0.0356297	0.253343
AGRN.15483.377	AGRN	375790	O00468	0.41284	0.0356485	0.253343
NFKBIB.17387.27	NFKBIB	4793	Q15653	-0.260976	0.035833	0.254292
PACSIN1.12676.1	PACSIN1		Q9BY11	-0.432025	0.0359172	0.254528
SLC41A2.12511.83	SLC41A2		Q96JW4	-0.196428	0.0361516	0.255721
FGF7.4487.1	FGF7	2252	P21781	0.37955	0.0361878	0.255721
TAX1BP3.12498.12	TAX1BP3		O14907	0.335955	0.0363034	0.256175
GAPDH.3848.14	GAPDH	2597	P04406	-0.659585	0.0364154	0.256602
ERLEC1.8957.72	ERLEC1	27248	Q96DZ1	0.456263	0.0364854	0.256734
CD207.3361.26	CD207	50489	Q9UJ71	0.135537	0.036583	0.257017
PTX3.6447.73	PTX3	5806	P26022	0.241119	0.0366285	0.257017
MUC16.15565.102	MUC16	94025	Q8WXI7	0.663864	0.0367447	0.257471
EXOSC1.7930.3	EXOSC1	51013	Q9Y3B2	0.234123	0.0373994	0.261691
ALAD.15523.9	ALAD	210	P13716	-0.570708	0.0376126	0.262531
NCL.13655.34	NCL	4691	P19338	0.447089	0.0376246	0.262531
NME2.4249.64	NME2	4831	P22392	-0.619785	0.0376965	0.262666
TOR1AIP2.10553.8	TOR1AIP2	163590	Q8NFQ8	0.438596	0.037905	0.262945
VPS26A.19293.6	VPS26A	9559	O75436	0.525041	0.0379345	0.262945
UBE2D1.19247.1	UBE2D1	7321	P51668	-0.201987	0.0379678	0.262945
CDH11.7763.25	CDH11	1009	P55287	-0.208145	0.0380308	0.262945
UBE2S.17729.20	UBE2S	27338	Q16763	0.448227	0.0380712	0.262945
SERPINE2.19154.41	SERPINE2	5270	P07093	-0.903027	0.0381879	0.262945
LEFTY2.15503.20	LEFTY2	7044	O00292	-0.519293	0.0381993	0.262945
FUT3.4548.4	FUT3	2525	P21217	0.278344	0.038209	0.262945
SV2A.12880.1	SV2A		Q7L0J3	0.226121	0.0382101	0.262945
INHBA.13738.8	INHBA	3624	P08476	0.561437	0.0385184	0.26394
CCL21.2516.57	CCL21	6366	O00585	0.545936	0.0385568	0.26394
ISG15.14151.4	ISG15	9636	P05161	0.810973	0.0385639	0.26394
RARRES1.8398.277	RARRES1	5918	P49788	0.545548	0.0386129	0.26394
CYTH4.12746.4	CYTH4		Q9UIA0	-0.236718	0.0386189	0.26394
BAG5.12743.18	BAG5	9529	Q9UL15	0.113076	0.0388572	0.265206
DEFB4A.13397.88	DEFB4A	100289462	O15263	1.41506	0.0390207	0.265692
IL18.5661.15	IL18	3606	Q14116	0.5304	0.0390348	0.265692
PPP3R1.15545.13	PPP3R1	5534	P63098	-0.375625	0.0393538	0.266401
KIAA2013.6538.90	KIAA2013	90231	Q8IYS2	0.25415	0.0394179	0.266401
SULT4A1.8357.43	SULT4A1	25830	Q9BR01	0.681992	0.0394733	0.266401
GTF2I.13609.11	GTF2I	2969	P78347	0.161511	0.0394957	0.266401
GSTM3.9748.31	GSTM3	2947	P21266	-0.219373	0.0395042	0.266401
TRADD.13507.51	TRADD	8717	Q15628	-0.273264	0.0395226	0.266401
RAB5B.19222.124	RAB5B	5869	P61020	-0.481986	0.0396102	0.266401
ANGPT4.2500.2	ANGPT4	51378	Q9Y264	0.238679	0.039625	0.266401
TXNDC12.19334.62	TXNDC12	51060	O95881	0.546889	0.0396358	0.266401
PROC.3758.68	PROC	5624	P04070	0.203755	0.0396722	0.266401
A1BG.16561.9	A1BG	1	P04217	-0.224905	0.0397727	0.266717
REPIN1.13554.78	REPIN1		Q9BWE0	-0.486056	0.0399486	0.267538
C11orf94.8383.20	C11orf94	143678	C9JXX5	0.11713	0.0401693	0.268655
PSMB5.12580.7	PSMB5	5693	P28074	-0.220903	0.0402342	0.26873
GNAS.5757.45	GNAS	2778	O95467	0.219398	0.0403395	0.269073
ELAVL1.11592.1	ELAVL1	1994	Q15717	0.466166	0.0405062	0.269826
MUL1.9315.16	MUL1	79594	Q969V5	0.624868	0.0407607	0.270284
STMN1.17367.5	STMN1	3925	P16949	0.378734	0.0408016	0.270284
ARL4D.18413.24	ARL4D	379	P49703	0.492909	0.0408517	0.270284
OBP2A.6526.77	OBP2A	29991	Q9NY56	0.356537	0.0408696	0.270284
MFGE8.4455.89	MFGE8	4240	Q08431	0.480318	0.0408878	0.270284
UCN3.10756.34	UCN3	114131	Q969E3	0.656119	0.0408997	0.270284
CA4.14069.61	CA4	762	P22748	-0.166105	0.0410529	0.270938
TFIP11.9043.7	TFIP11	24144	Q9UBB9	-0.353361	0.0412204	0.271684
LGALS3BP.5000.52	LGALS3BP	3959	Q08380	-0.458879	0.0413204	0.271684
MYL7.19296.51	MYL7	58498	Q01449	-0.311072	0.0413807	0.271684
ST3GAL2.6281.51	ST3GAL2	6483	Q16842	0.653731	0.0413834	0.271684
HSPA1A.10803.22	HSPA1A	3303	P0DMV8	0.462949	0.0414821	0.271975
LGALS2.3033.57	LGALS2	3957	P05162	0.220105	0.0416297	0.272427
WFDC1.9316.67	WFDC1	58189	Q9HC57	0.615449	0.0416601	0.272427
SNAPIN.6975.52	SNAPIN	23557	O95295	-0.129564	0.0420294	0.274172
PLG.4150.75	PLG	5340	P00747	0.264609	0.0420376	0.274172
WFDC2.11388.75	WFDC2	10406	Q14508	0.516006	0.0420917	0.274172
LRPAP1.3640.14	LRPAP1	4043	P30533	0.431576	0.0422429	0.274799
RAB26.6997.32	RAB26	25837	Q9ULW5	0.361059	0.0423506	0.275141
PDGFD.9341.1	PDGFD	80310	Q9GZP0	-0.395025	0.0425191	0.275877
BCAM.2816.50	BCAM	4059	P50895	0.296724	0.0425965	0.276021
LRP8.3323.37	LRP8	7804	Q14114	0.307531	0.0426821	0.276087
HNRNPAB.8894.80	HNRNPAB	3182	Q99729	0.435521	0.0427404	0.276087
ADAM15.9956.7	ADAM15	8751	Q13444	0.173665	0.0427886	0.276087
GSS.15526.33	GSS	2937	P48637	-0.376705	0.0428779	0.276087
DSCAM.9175.48	DSCAM	1826	O60469	-0.155749	0.0428831	0.276087
POLR2K.19134.66	POLR2K	5440	P53803	-0.481799	0.0429957	0.276456
CCL27.2192.63	CCL27	10850	Q9Y4X3	0.273035	0.0433949	0.278664
BCL6.13111.79	BCL6	604	P41182	-0.821887	0.0438314	0.281106
RBL2.13565.2	RBL2	5934	Q08999	0.51671	0.0439398	0.281124
HNF1A.11193.27	HNF1A		P20823	-0.280929	0.0439467	0.281124
GDI2.2647.66	GDI2	2665	P50395	-0.463	0.0440956	0.281432
NANOG.2732.58	NANOG	79923	Q9H9S0	0.248333	0.0441076	0.281432
SEMA6B.5121.3	SEMA6B	10501	Q9H3T3	0.391027	0.044245	0.281768
TNFRSF10B.5534.49	TNFRSF10B	8795	O14763	0.36036	0.044273	0.281768
ARL1.12392.30	ARL1	400	P40616	-0.255696	0.0443826	0.28206
KLK13.11152.46	KLK13	26085	Q9UKR3	0.599495	0.0444318	0.28206
CXCL12.9278.9	CXCL12	6387	P48061	0.372695	0.044492	0.282084
ADCK4.9794.17	ADCK4	79934	Q96D53	-0.226635	0.0446593	0.282786
STAT6.10372.18	STAT6	6778	P42226	-0.502953	0.0448202	0.283445
CDC42.9840.2	CDC42	998	P60953	-0.814815	0.0449137	0.283651
FST.4132.27	FST	10468	P19883	0.361124	0.0449992	0.283651
CTSG.2431.17	CTSG	1511	P08311	0.429153	0.0450319	0.283651
PAF.19158.1	PAF	9768	Q15004	-0.468429	0.0451079	0.283651
HBEGF.14094.29	HBEGF	1839	Q99075	-0.936543	0.0452113	0.283651
C1QTNF3.7251.64	C1QTNF3	114899	Q9BXJ4	-0.264889	0.0452183	0.283651
TACSTD2.14034.22	TACSTD2	4070	P09758	0.125155	0.0452502	0.283651
SUMF2.6069.71	SUMF2	25870	Q8NBJ7	0.408915	0.0454991	0.284047
FAM20A.6433.57	FAM20A	54757	Q96MK3	0.356203	0.0455351	0.284047
EPHB6.5078.82	EPHB6	2051	O15197	0.297492	0.0455566	0.284047
B3GNT6.7082.2	B3GNT6	11041	Q6ZMB0	0.122132	0.0455907	0.284047
XXYLT1.6375.75	XXYLT1	152002	Q8NBI6	0.308046	0.0456474	0.284047
TPRKB.12417.46	TPRKB		Q9Y3C4	-0.174407	0.0456685	0.284047
SPTAN1.5031.10	SPTAN1	6709	Q13813	0.139388	0.0457113	0.284047
LTB4R.13477.65	LTB4R	1241	Q15722	-0.875177	0.0459689	0.284993
NEDD9.12862.14	NEDD9	4739	Q14511	0.134117	0.0459777	0.284993
PLA2G12B.9380.2	PLA2G12B	84647	Q9BX93	-0.396737	0.0460732	0.285232
MAGEB10.11456.2	MAGEB10		Q96LZ2	-0.208675	0.0464244	0.286191
LTA.LTB.3505.6	LTA LTB	4049 4050	P01374, Q06643	-0.328045	0.0464375	0.286191
RAB27A.9504.19	RAB27A	5873	P51159	0.721856	0.0464399	0.286191
HNRNPC.11429.80	HNRNPC	3183	P07910	0.189645	0.0464574	0.286191
ADH1C.15525.294	ADH1C	126	P00326	-1.1006	0.0465315	0.286295
ZNF41.10003.15	ZNF41	7592	P51814	-0.434769	0.0465929	0.28632
PSMA3.18926.7	PSMA3	5684	P25788	-0.229649	0.046922	0.287988
RAC1.2870.29	RAC1	5879	P63000	-0.647219	0.0474406	0.290685
CHEK1.2853.68	CHEK1	1111	O14757	0.230943	0.047494	0.290685
SIGLEC14.8248.222	SIGLEC14	100049587	Q08ET2	0.849508	0.047536	0.290685
CGA.LHB.2953.31	CGA LHB	1081 3972	P01215, P01229	-0.761678	0.0476954	0.291303
NUDT3.12796.44	NUDT3		O95989	0.303105	0.0481056	0.29345
H2AFZ.4163.5	H2AFZ	3015	P0C0S5	0.533892	0.0481676	0.29347
TPST1.7928.183	TPST1	8460	O60507	0.383139	0.0482955	0.293891
JUND.19602.36	JUND	3727	P17535	0.283427	0.0483805	0.29405
FBXL5.12846.3	FBXL5		Q9UKA1	-0.223498	0.048799	0.295982
NET1.14260.112	NET1	10276	Q7Z628	0.222078	0.0488168	0.295982
IFNL2.4397.26	IFNL2	282616	Q8IZJ0	0.2682	0.0488964	0.295986
CA12.19347.37	CA12	771	O43570	0.138779	0.048936	0.295986
EDN1.6495.14	EDN1	1906	P05305	0.215937	0.0492677	0.297335
POMC.9204.33	POMC	5443	P01189	0.507933	0.0493762	0.297335
GOLM1.8983.7	GOLM1	51280	Q8NBJ4	0.571564	0.0493851	0.297335
CCDC126.6388.21	CCDC126	90693	Q96EE4	-0.259348	0.0493972	0.297335
SIGLEC5.9275.2	SIGLEC5	8778	O15389	1.1058	0.0497811	0.299286
MTHFD1.12575.30	MTHFD1	4522	P11586	-0.525127	0.0498684	0.299384
MADCAM1.11258.41	MADCAM1	8174	Q13477	-0.209838	0.0499173	0.299384
PPIL2.14314.6	PPIL2		Q13356	-0.224511	0.0500545	0.299638
NCR1.8360.169	NCR1	9437	O76036	0.379001	0.0501386	0.299638
A2M.3708.62	A2M	2	P01023	-0.396134	0.0501396	0.299638
GABARAPL1.12661.44	GABARAPL1		Q9H0R8	0.41727	0.0502654	0.299773
PET117.19303.64	PET117	100303755	Q6UWS5	0.511797	0.0503799	0.299773
HMGCS1.13496.19	HMGCS1		Q01581	-0.896374	0.0503949	0.299773
BTNL8.9026.40	BTNL8	79908	Q6UX41	0.167707	0.0504023	0.299773
RPS6KA1.12329.21	RPS6KA1	6195	Q15418	-0.575834	0.0505196	0.300114
AKT1.15627.83	AKT1	207	P31749	-0.537469	0.0506244	0.300277
SEPW1.18310.26	SEPW1	6415	P63302	0.63959	0.0506673	0.300277
CCL15.18289.16	CCL15	6359	Q16663	0.439109	0.0508213	0.300833
EPOR.19575.4	EPOR	2057	P19235	0.224958	0.0508883	0.300874
ANTXR2.15559.5	ANTXR2	118429	P58335	-0.486386	0.0509601	0.300942
STMN2.10900.272	STMN2	11075	Q93045	0.555274	0.0510617	0.301186
RBM46.13958.5	RBM46		Q8TBY0	-0.181785	0.0513605	0.301955
N6AMT1.11096.57	N6AMT1	29104	Q9Y5N5	-0.253351	0.0514343	0.301955
FUT5.4549.78	FUT5	2527	Q11128	0.580034	0.0514499	0.301955
FAH.11424.4	FAH	2184	P16930	-0.448064	0.0514594	0.301955
CXCL13.3487.32	CXCL13	10563	O43927	0.878936	0.0515212	0.301955
CLEC12A.11187.11	CLEC12A		Q5QGZ9	0.792572	0.0515922	0.301955
CLTC.13711.10	CLTC	1213	Q00610	0.282327	0.0518072	0.301955
PPT1.9244.27	PPT1	5538	P50897	0.352127	0.0518723	0.301955
VEGFA.2597.8	VEGFA	7422	P15692	0.273034	0.0519421	0.301955
GABARAP.17735.130	GABARAP	11337	O95166	0.41964	0.0519472	0.301955
HSPA5.16588.10	HSPA5	3309	P11021	0.568231	0.0520157	0.301955
STMN3.8019.73	STMN3	50861	Q9NZ72	0.366701	0.0521025	0.301955
NAT1.12632.14	NAT1	9	P18440	-0.211211	0.0521216	0.301955
LEPR.5400.52	LEPR	3953	P48357	-0.627905	0.0521332	0.301955
TES.17419.17	TES	26136	Q9UGI8	-0.311939	0.0521792	0.301955
DNER.9769.48	DNER	92737	Q8NFT8	-0.342935	0.0522017	0.301955
APOA2.7127.3	APOA2	336	P02652	0.32729	0.0522195	0.301955
ACAN.3280.49	ACAN	176	P16112	0.367437	0.0522927	0.302028
CCDC64.11158.40	CCDC64		Q6ZP65	0.562119	0.0524533	0.302606
IFI16.13940.19	IFI16	3428	Q16666	0.665485	0.0526773	0.303547
DPP10.7890.68	DPP10	57628	Q8N608	0.151266	0.0527817	0.303799
FSTL5.7099.33	FSTL5	56884	Q8N475	-0.401519	0.053017	0.304326
DNER.11442.1	DNER	92737	Q8NFT8	0.225799	0.0531101	0.304326
VEGFB.9453.12	VEGFB	7423	P49765	-0.256385	0.0531128	0.304326
NSF.13992.12	NSF	4905	P46459	-0.326788	0.0531374	0.304326
PSMA7.12460.18	PSMA7	5688	O14818	-0.425899	0.0532175	0.304326
PRSS1.3049.61	PRSS1	5644	P07477	0.561879	0.0532388	0.304326
GABBR2.9930.48	GABBR2	9568	O75899	-0.46683	0.0533118	0.304395
RDX.18373.13	RDX	5962	P35241	-0.487348	0.0533864	0.304473
GSTP1.4911.49	GSTP1	2950	P09211	0.399143	0.0536816	0.305808
SFN.4829.43	SFN	2810	P31947	0.687382	0.0539032	0.30672
LRRTM3.4453.83	LRRTM3	347731	Q86VH5	0.24994	0.0542557	0.308375
GULP1.19180.38	GULP1	51454	Q9UBP9	-0.292779	0.0544966	0.309392
QDPR.11257.1	QDPR	5860	P09417	-0.463496	0.0546182	0.30973
FGF5.3065.65	FGF5	2250	P12034	0.281498	0.0548459	0.310113
ADAM17.8882.1	ADAM17	6868	P78536	-0.59087	0.0549091	0.310113
HSPA8.5903.91	HSPA8	3312	P11142	0.372584	0.0549577	0.310113
EPS15L1.4212.5	EPS15L1	58513	Q9UBC2	0.293821	0.055083	0.310113
WNT3A.13236.25	WNT3A	89780	P56704	-0.489086	0.0550936	0.310113
OAF.6414.8	OAF	220323	Q86UD1	0.273928	0.0551053	0.310113
DSTN.18883.4	DSTN	11034	P60981	-0.441901	0.0551201	0.310113
GLTPD2.7948.129	GLTPD2	388323	A6NH11	0.43162	0.0552504	0.310496
WSCD2.6274.15	WSCD2	9671	Q2TBF2	0.310203	0.0554165	0.311079
TFF1.9185.15	TFF1	7031	P04155	0.766974	0.0555231	0.311328
CD97.18881.7	CD97	976	P48960	0.398365	0.0559711	0.3132
PDCD5.12517.52	PDCD5	9141	O14737	0.359569	0.0559968	0.3132
NRG1.15446.25	NRG1	3084	Q02297	0.379557	0.0560847	0.3132
BTD.15644.1	BTD	686	P43251	-0.305594	0.0561078	0.3132
NUDCD3.4254.6	NUDCD3	23386	Q8IVD9	0.328915	0.0561735	0.313217
SCARF2.9925.56	SCARF2	91179	Q96GP6	0.326217	0.056335	0.313246
VAMP7.19357.11	VAMP7	6845	P51809	0.149624	0.056466	0.313246
LRP12.15506.34	LRP12	29967	Q9Y561	0.210823	0.0564864	0.313246
DKK4.3365.7	DKK4	27121	Q9UBT3	-0.703893	0.0565199	0.313246
CLEC4C.9094.5	CLEC4C	170482	Q8WTT0	-0.472383	0.0565376	0.313246
BSG.3585.54	BSG	682	P35613	0.322304	0.0565719	0.313246
G6PD.19297.4	G6PD	2539	P11413	-0.735171	0.0566175	0.313246
CKAP2.5345.51	CKAP2	26586	Q8WWK9	-0.222319	0.0567744	0.313767
ADAM12.4420.7	ADAM12	8038	O43184	0.270394	0.0568854	0.314033
ADRM1.9057.19	ADRM1	11047	Q16186	-0.136308	0.0569855	0.314238
ZNF134.12787.47	ZNF134	7693	P52741	-0.156077	0.057065	0.314329
XG.8044.90	XG	7499	P55808	0.313376	0.0572162	0.3148
CD48.3292.75	CD48	962	P09326	0.46219	0.0572764	0.3148
CDH1.18429.10	CDH1	999	P12830	0.354724	0.0574547	0.315054
ACY1.3343.1	ACY1	95	Q03154	-0.658228	0.0575602	0.315054
GSN.16607.78	GSN	2934	P06396	-0.29698	0.057619	0.315054
SLC16A3.9049.2	SLC16A3	9123	O15427	0.154524	0.0576258	0.315054
AIDA.17347.80	AIDA	64853	Q96BJ3	-0.420436	0.057638	0.315054
ATF6B.11387.3	ATF6B	1388	Q99941	0.380053	0.0577812	0.315463
FGF9.19584.33	FGF9	2254	P31371	-0.220934	0.0578391	0.315463
ADGRE2.4546.27	ADGRE2	30817	Q9UHX3	0.431823	0.0580026	0.31601
HAPLN1.3196.6	HAPLN1	1404	P10915	0.317841	0.0581531	0.316017
NTNG1.5637.81	NTNG1	22854	Q9Y2I2	0.290713	0.0581928	0.316017
LRRC15.6557.50	LRRC15	131578	Q8TF66	-0.624832	0.0581937	0.316017
ADGRG5.4551.72	ADGRG5	221188	Q8IZF4	0.240671	0.0585153	0.317418
NCOA2.14045.12	NCOA2		Q15596	-0.305992	0.0586714	0.317748
ADAMTSL2.6379.62	ADAMTSL2	9719	Q86TH1	0.378198	0.0587033	0.317748
CBR1.12381.26	CBR1	873	P16152	0.474731	0.0588476	0.318185
SGK3.10042.8	SGK3	23678	Q96BR1	0.145282	0.0590494	0.318225
SLIT2.18930.28	SLIT2	9353	O94813	0.631726	0.0590675	0.318225
SMURF1.11557.3	SMURF1	57154	Q9HCE7	0.257223	0.0590875	0.318225
PDGFRA.10366.11	PDGFRA	5156	P16234	0.389316	0.0591841	0.318225
FLRT3.13123.3	FLRT3	23767	Q9NZU0	0.456196	0.0592028	0.318225
ADH5.11369.23	ADH5	128	P11766	-0.461377	0.0592982	0.318225
GFRA1.3314.74	GFRA1	2674	P56159	0.728504	0.0593009	0.318225
PLA2G5.2449.1	PLA2G5	5322	P39877	0.275406	0.0594023	0.318243
CELF2.7245.2	CELF2	10659	O95319	0.601292	0.0594316	0.318243
AMY2A.18917.53	AMY2A	279	P04746	-0.538655	0.0595964	0.318783
VIM.15540.6	VIM	7431	P08670	0.717468	0.0601735	0.320886
GGT2.6334.9	GGT2	728441	P36268	-0.411592	0.0601805	0.320886
TREX2.17829.2	TREX2	11219	Q9BQ50	-0.373724	0.0602579	0.320886
FCRL3.4440.15	FCRL3	115352	Q96P31	0.404542	0.0602654	0.320886
TGFBR3.3009.3	TGFBR3	7049	Q03167	0.322612	0.0603107	0.320886
PACAP.16322.10	PACAP	51237	Q8WU39	0.582493	0.0604543	0.321171
PIP4K2B.18232.42	PIP4K2B	8396	P78356	-0.483471	0.060519	0.321171
ALDOC.9876.20	ALDOC	230	P09972	-0.491852	0.060557	0.321171
SCIN.12684.5	SCIN	85477	Q9Y6U3	0.321168	0.0607342	0.321638
SLC22A16.9969.8	SLC22A16	85413	Q86VW1	-0.635204	0.0607739	0.321638
MED1.3892.21	MED1	5469	Q15648	0.329236	0.0609267	0.322105
MMP19.6425.87	MMP19	4327	Q99542	0.521087	0.0611769	0.323086
PSMB1.12612.37	PSMB1	5689	P20618	0.523274	0.0617142	0.325568
STIP1.5489.18	STIP1	10963	P31948	-0.37523	0.061865	0.325568
WFIKKN2.3235.50	WFIKKN2	124857	Q8TEU8	0.292401	0.0618829	0.325568
NTS.7857.22	NTS	4922	P30990	0.701063	0.0619975	0.325568
LGALS9.9197.4	LGALS9	3965	O00182	0.295111	0.0620258	0.325568
IL17B.3499.77	IL17B	27190	Q9UHF5	0.171962	0.0620877	0.325568
PLOD2.6923.1	PLOD2	5352	O00469	0.393905	0.0621029	0.325568
FCAR.4987.17	FCAR	2204	P24071	0.210929	0.0621881	0.325628
CDON.4541.49	CDON	50937	Q4KMG0	-0.460679	0.0622448	0.325628
DCN.2666.53	DCN	1634	P07585	0.307487	0.062431	0.326261
BGLAP.11067.13	BGLAP	632	P02818	-0.493224	0.062499	0.326275
TNFRSF21.5404.53	TNFRSF21	27242	O75509	0.374961	0.0627015	0.326656
TNC.5738.25	TNC	3371	P24821	0.406616	0.0627547	0.326656
KRT5.11177.16	KRT5	3852	P13647	0.480336	0.0627681	0.326656
SULT1C2.17811.78	SULT1C2	6819	O00338	-0.233102	0.0628834	0.326854
PLA2G10.2949.6	PLA2G10	8399	O15496	0.303193	0.0629842	0.326854
SMIM13.13452.113	SMIM13		P0DJ93	0.171633	0.0630026	0.326854
DIRAS1.17793.4	DIRAS1	148252	O95057	-0.355861	0.0632102	0.327591
WNT11.6624.94	WNT11	7481	O96014	0.118679	0.0633501	0.327911
ITGA1.ITGB1.3503.4	ITGA1 ITGB1	3672 3688	P56199, P05556	0.469852	0.0634189	0.327911
CDHR3.8222.49	CDHR3	222256	Q6ZTQ4	-0.275217	0.0635008	0.327911
ACBD7.13563.259	ACBD7	414149	Q8N6N7	0.259407	0.0635519	0.327911
TRIO.11126.102	TRIO	7204	O75962	-0.198301	0.0636	0.327911
CXCL9.9188.119	CXCL9	4283	Q07325	0.568521	0.0637094	0.328136
TIMD4.15449.33	TIMD4	91937	Q96H15	0.566076	0.0642496	0.330578
TFRC.8795.48	TFRC	7037	P02786	0.483085	0.0643628	0.330818
THSD7A.9600.55	THSD7A	221981	Q9UPZ6	-0.31499	0.0646066	0.330818
IL7R.5089.11	IL7R	3575	P16871	0.209174	0.0646434	0.330818
HSPA1A.10721.76	HSPA1A	3303	P0DMV8	0.440861	0.0647441	0.330818
SORCS3.15637.38	SORCS3	22986	Q9UPU3	-0.179442	0.0647466	0.330818
RGS7.12538.19	RGS7		P49802	-0.277548	0.0647559	0.330818
CA5B.17673.34	CA5B	11238	Q9Y2D0	-0.143319	0.0648157	0.330818
RNF41.13411.21	RNF41		Q9H4P4	0.147989	0.064826	0.330818
DEFB113.13374.4	DEFB113	245927	Q30KQ7	-0.463965	0.0649259	0.330989
TNNI3.5441.67	TNNI3	7137	P19429	0.439322	0.0651121	0.331589
CNTN2.3296.92	CNTN2	6900	Q02246	0.310649	0.0652096	0.331589
GDF3.16755.195	GDF3	9573	Q9NR23	0.194059	0.0652853	0.331589
SPATA31D4.9524.46	SPATA31D4	389761	Q6ZUB0	-0.374023	0.0653248	0.331589
BMX.3414.40	BMX	660	P51813	0.184165	0.0655268	0.331589
NMES1.6406.3	NMES1	84419	Q9C002	-0.268275	0.0655291	0.331589
DMKN.8535.102	DMKN	93099	Q6E0U4	0.103372	0.0655646	0.331589
FKBP7.9288.7	FKBP7	51661	Q9Y680	0.371893	0.0656089	0.331589
NAPB.12655.30	NAPB	63908	Q9H115	-0.193734	0.0656407	0.331589
AKR7A3.18173.11	AKR7A3	22977	O95154	-0.833379	0.066138	0.332682
SCUBE3.16773.29	SCUBE3	222663	Q8IX30	1.04262	0.0661825	0.332682
DCUN1D5.8760.10	DCUN1D5	84259	Q9BTE7	-0.271611	0.0662152	0.332682
SIGLEC5.16792.4	SIGLEC5	8778	O15389	0.978579	0.0662658	0.332682
UMODL1.9114.84	UMODL1	89766	Q5DID0	-0.13969	0.0663474	0.332682
DUT.9995.6	DUT	1854	P33316	0.546574	0.0663581	0.332682
PRIM1.13591.31	PRIM1		P49642	-0.611996	0.0664534	0.332682
RAB1B.19278.19	RAB1B	81876	Q9H0U4	-0.649784	0.0665351	0.332682
CAV2.9457.3	CAV2	858	P51636	0.164895	0.0666273	0.332682
MPST.12686.15	MPST	4357	P25325	0.185342	0.0666469	0.332682
EIF4G3.13991.47	EIF4G3		O43432	-0.407836	0.0666481	0.332682
TIMP3.2480.58	TIMP3	7078	P35625	-0.681363	0.0666734	0.332682
NT5C3L.19135.5	NT5C3L	115024	Q969T7	-0.229887	0.0667228	0.332682
CD83.5065.8	CD83	9308	Q01151	0.187076	0.0670307	0.33371
C8G.14708.59	C8G	733	P07360	-0.229348	0.0670739	0.33371
CD63.9190.7	CD63	967	P08962	-0.254585	0.0671295	0.33371
PCOLCE.11237.49	PCOLCE	5118	Q15113	0.312101	0.0672636	0.333782
FGF12.4392.54	FGF12	2257	P61328	0.305712	0.0672776	0.333782
CST6.14711.27	CST6	1474	Q15828	0.479678	0.0674722	0.334355
BPI.4126.22	BPI	671	P17213	0.668508	0.0675268	0.334355
MMP9.2579.17	MMP9	4318	P14780	0.61975	0.0675989	0.334381
FLNA.11171.25	FLNA	2316	P21333	0.344948	0.0677722	0.334657
GOSR1.7805.52	GOSR1	9527	O95249	0.237729	0.0677889	0.334657
AURKB.3346.72	AURKB	9212	Q96GD4	0.217933	0.0682981	0.33664
ETV5.13403.5	ETV5	2119	P41161	0.132745	0.0683253	0.33664
TMEM167A.11112.18	TMEM167A	153339	Q8TBQ9	-0.146209	0.0685539	0.337119
OBP2B.5680.54	OBP2B	29989	Q9NPH6	0.629997	0.0686788	0.337119
CRTAC1.5632.6	CRTAC1	55118	Q9NQ79	-0.342891	0.0687834	0.337119
FLT1.8231.122	FLT1	2321	P17948	0.56396	0.0687936	0.337119
CD177.13116.25	CD177	57126	Q8N6Q3	0.718364	0.0688912	0.337119
BLNK.19225.11	BLNK	29760	Q8WV28	0.190696	0.0688943	0.337119
SERPINE1.2925.9	SERPINE1	5054	P05121	-0.617123	0.0689095	0.337119
KLK4.2833.20	KLK4	9622	Q9Y5K2	0.191185	0.0689623	0.337119
CTSO.9264.11	CTSO	1513	P43234	0.404599	0.0691079	0.337501
DTYMK.19504.22	DTYMK	1841	P23919	-0.47501	0.069291	0.338064
XCL1.4143.74	XCL1	6375	P47992	0.227312	0.069432	0.338422
OLFML1.8815.1	OLFML1	283298	Q6UWY5	-0.14225	0.0698204	0.339314
RAB11A.17744.31	RAB11A	8766	P62491	-0.563981	0.0698313	0.339314
EFNB3.2514.65	EFNB3	1949	Q15768	0.408855	0.0698434	0.339314
LOXL2.6504.65	LOXL2	4017	Q9Y4K0	0.133455	0.069947	0.339314
MLYCD.11538.216	MLYCD		O95822	-0.242362	0.0699772	0.339314
LRRC3.6917.49	LRRC3	81543	Q9BY71	-0.238396	0.0700226	0.339314
PALM.18306.1	PALM	5064	O75781	0.150137	0.0701096	0.339407
NUDC.8887.21	NUDC	10726	Q9Y266	0.34305	0.070776	0.342301
MUSK.11547.84	MUSK		O15146	0.555743	0.0710312	0.343203
SAA2.18832.65	SAA2	6289	P0DJI9	1.25453	0.0716578	0.345896
PRKCZ.2645.54	PRKCZ	5590	Q05513	0.411272	0.0717919	0.345899
LILRA5.7787.25	LILRA5	353514	A6NI73	0.356066	0.071883	0.345899
MAPKAPK2.3820.68	MAPKAPK2	9261	P49137	-0.569988	0.0719758	0.345899
LIF.7790.21	LIF	3976	P15018	0.160397	0.0719806	0.345899
DARS.12675.14	DARS	1615	P14868	-0.53941	0.0720046	0.345899
SCIMP.10510.62	SCIMP	388325	Q6UWF3	-0.224576	0.0722127	0.346565
HDGFRP2.4553.65	HDGFRP2	84717	Q7Z4V5	0.284039	0.0722973	0.346638
CPOX.18241.18	CPOX	1371	P36551	-0.416848	0.0724652	0.347111
KRTAP24.14615.46	KRTAP2-4		Q9BYR9	0.3015	0.0725771	0.347313
ASH1L.12622.96	ASH1L	55870	Q9NR48	-0.18874	0.0728864	0.347869
RAN.4282.3	RAN	5901	P62826	-0.815585	0.0729531	0.347869
DHX8.11601.26	DHX8		Q14562	0.23305	0.0730198	0.347869
NAGS.11247.20	NAGS		Q8N159	-0.181938	0.0730484	0.347869
C4A.C4B.18821.9	C4A C4B	720 721	P0C0L4 P0C0L5	0.482824	0.0730554	0.347869
MYB.11618.83	MYB	4602	P10242	-0.125171	0.073303	0.347869
KERA.10758.2	KERA	11081	O60938	0.389446	0.0734813	0.347869
PSG11.7846.44	PSG11	5680	Q9UQ72	-0.266873	0.0735129	0.347869
EPHA1.3431.54	EPHA1	2041	P21709	0.532175	0.073667	0.347869
BAG1.17195.43	BAG1	573	Q99933	-0.373634	0.0736849	0.347869
EPB41.4706.17	EPB41	2035	P11171	-0.463841	0.0739151	0.347869
SORCS2.4569.52	SORCS2	57537	Q96PQ0	-1.08243	0.0739577	0.347869
PRKCG.5476.66	PRKCG	5582	P05129	-0.207587	0.0740346	0.347869
TGFBR2.5133.17	TGFBR2	7048	P37173	-0.199878	0.0741272	0.347869
ACLY.12700.9	ACLY	47	P53396	0.115877	0.0741498	0.347869
CCL13.4144.13	CCL13	6357	Q99616	0.325556	0.0741719	0.347869
RAD23B.12522.6	RAD23B	5887	P54727	0.311687	0.0742161	0.347869
PROC.2961.1	PROC	5624	P04070	-0.280419	0.0742375	0.347869
FGF4.4123.60	FGF4	2249	P08620	0.210345	0.0742399	0.347869
CGA.FSHB.3032.11	CGA FSHB	1081 2488	P01215, P01225	-0.833307	0.0742753	0.347869
MASP1.3605.77	MASP1	5648	P48740	-0.164972	0.0742981	0.347869
IL4.2906.55	IL4	3565	P05112	0.205891	0.0743576	0.347869
ADCYAP1.8285.64	ADCYAP1	116	P18509	-0.141415	0.0743602	0.347869
INHBC.6408.2	INHBC	3626	P55103	-0.354518	0.0744425	0.347869
PLCG1.4563.61	PLCG1	5335	P19174	-0.168826	0.0744754	0.347869
MPPED2.19153.53	MPPED2	744	Q15777	0.102896	0.0746005	0.347869
GCLM.18214.2	GCLM	2730	P48507	-0.466865	0.0746965	0.347869
GP5.7185.29	GP5	2814	P40197	-0.493163	0.0747095	0.347869
IFNGR2.8818.13	IFNGR2	3460	P38484	-0.181096	0.0747125	0.347869
S100A14.17828.3	S100A14	57402	Q9HCY8	0.219827	0.0748288	0.348086
CYCS.2942.50	CYCS	54205	P99999	-0.280097	0.0749103	0.348141
HINT1.5900.11	HINT1	3094	P49773	0.239594	0.0750121	0.348291
SERPINA3.4153.11	SERPINA3	12	P01011	0.553027	0.0753097	0.349298
SPACA3.8076.4	SPACA3	124912	Q8IXA5	0.421305	0.0753689	0.349298
EIF1AD.13545.97	EIF1AD	84285	Q8N9N8	0.325767	0.0755686	0.349899
APOA1.2750.3	APOA1	335	P02647	-0.458708	0.0756529	0.349965
POLI.13536.56	POLI		Q9UNA4	0.119256	0.0758966	0.350671
RNPC3.12814.17	RNPC3		Q96LT9	0.138812	0.076006	0.350671
TPSG1.3404.51	TPSG1	25823	Q9NRR2	0.19938	0.0760162	0.350671
ARHGEF2.12848.9	ARHGEF2	9181	Q92974	0.186814	0.0762597	0.35147
HSPA13.17515.6	HSPA13	6782	P48723	0.382733	0.0765986	0.352707
PDCD6IP.18174.79	PDCD6IP	10015	Q8WUM4	-0.434196	0.0767156	0.35292
SYNJ2BP.17348.5	SYNJ2BP		P57105	0.165584	0.0767968	0.352969
ANXA7.18244.1	ANXA7	310	P20073	-0.432659	0.0773372	0.355126
ITGA2.15603.20	ITGA2	3673	P17301	-0.55442	0.0774476	0.355306
HIST3H2A.14144.3	HIST3H2A		Q7L7L0	0.561804	0.0778869	0.356994
TNC.7131.207	TNC	3371	P24821	0.376219	0.0781408	0.357829
CSGALNACT2.10772.21	CSGALNACT2	55454	Q8N6G5	-0.525037	0.0782341	0.357928
MMP16.5268.49	MMP16	4325	P51512	0.174138	0.0783775	0.358084
PRDX1.3855.56	PRDX1	5052	Q06830	-0.330372	0.0784114	0.358084
RSPO2.4566.24	RSPO2	340419	Q6UXX9	0.222165	0.0785558	0.358085
PIK3CA.PIK3R1.3390.72	PIK3CA PIK3R1	5290 5295	P42336 P27986	0.231374	0.0786161	0.358085
CLEC7A.3603.60	CLEC7A	64581	Q9BXN2	0.343589	0.0786267	0.358085
ASNA1.13620.10	ASNA1	439	O43681	0.304116	0.0787529	0.358234
BCL2A1.3413.50	BCL2A1	597	Q16548	-0.182828	0.0788028	0.358234
CD79A.15674.3	CD79A	973	P11912	-0.545267	0.0789815	0.35872
PCDHGA2.7175.4	PCDHGA2	56113	Q9Y5H1	0.213895	0.0792859	0.359545
COPS7B.12384.92	COPS7B		Q9H9Q2	-0.525182	0.0793072	0.359545
CD46.17682.1	CD46	4179	P15529	0.30567	0.0794552	0.359619
BRD4.10043.31	BRD4	23476	O60885	0.178995	0.0794674	0.359619
KAT2B.12368.18	KAT2B	8850	Q92831	0.142256	0.0796086	0.359736
EYS.9365.91	EYS	346007	Q5T1H1	-0.421152	0.0796374	0.359736
PIP4K2A.12697.30	PIP4K2A	5305	P48426	-0.508575	0.0797957	0.35991
ISCU.7201.5	ISCU	23479	Q9H1K1	0.24456	0.07982	0.35991
CA5A.8791.151	CA5A	763	P35218	0.275035	0.0799731	0.360115
FCER2.3291.30	FCER2	2208	P06734	0.50858	0.0800899	0.360115
IDE.3197.70	IDE	3416	P14735	-0.23793	0.0801291	0.360115
CRABP2.11696.7	CRABP2	1382	P29373	0.479237	0.0801538	0.360115
NID1.3213.65	NID1	4811	P14543	0.357748	0.0803975	0.360886
CCPG1.8889.5	CCPG1	9236	Q9ULG6	0.146951	0.0806384	0.361642
OLA1.12659.13	OLA1	29789	Q9NTK5	-0.384861	0.0808283	0.362048
SET.5364.7	SET	6418	Q01105	-0.342022	0.0808738	0.362048
ADGRF1.11243.90	ADGRF1		Q5T601	-0.215528	0.0809612	0.362115
PLA2G2E.2447.7	PLA2G2E	30814	Q9NZK7	0.210827	0.0813077	0.363339
GUCA2B.6223.5	GUCA2B	2981	Q16661	0.502866	0.0819908	0.366064
COL1A1.11140.56	COL1A1	1277	P02452	0.317288	0.0821486	0.366441
EDA.2826.53	EDA	1896	Q92838	0.318741	0.0822885	0.366738
CCT8.12699.28	CCT8	10694	P50990	-0.429803	0.082472	0.366743
SCARF1.5129.12	SCARF1	8578	Q14162	0.337016	0.0825532	0.366743
RBBP5.13631.1	RBBP5	5929	Q15291	0.175267	0.0825582	0.366743
GDF7.16756.30	GDF7	151449	Q7Z4P5	0.211115	0.0826757	0.366743
FDX1L.11231.12	FDX1L	112812	Q6P4F2	0.393073	0.0827041	0.366743
KCNE5.8908.14	KCNE5	23630	Q9UJ90	0.248996	0.08273	0.366743
CAPN1.CAPNS1.2668.70	CAPN1 CAPNS1	823 826	P07384 P04632	-0.327254	0.082871	0.367042
PTN.3045.72	PTN	5764	P21246	0.782515	0.0829485	0.36706
UPK3BL.6633.43	UPK3BL	100134938	B0FP48	-0.401995	0.0832647	0.367743
C14orf93.6439.59	C14orf93	60686	Q9H972	-0.332358	0.0833124	0.367743
IGHG1.IGHG2.IGHG3.IGHG4.IGK.IGL.2744.57	IGHG1 IGHG2 IGHG3 IGHG4 IGK@ IGL@	3500 3501 3502 3503 50802 3535	P01857	-0.165841	0.0833236	0.367743
SCT.3728.52	SCT	6343	P09683	0.112706	0.0834755	0.367771
ACAP2.12343.14	ACAP2	23527	Q15057	0.255739	0.0834773	0.367771
POLE3.19170.25	POLE3	54107	Q9NRF9	0.186049	0.0837427	0.36796
DNAJC18.8033.1	DNAJC18	202052	Q9H819	-0.254503	0.0837842	0.36796
NT5E.15452.5	NT5E	4907	P21589	0.458612	0.083848	0.36796
TSTD1.19277.4	TSTD1	100131187	Q8NFU3	0.4353	0.0838489	0.36796
C10orf105.11220.53	C10orf105		Q8TEF2	0.262844	0.0838883	0.36796
JAG1.7754.11	JAG1	182	P78504	0.166057	0.0839691	0.367991
RAB27B.13596.3	RAB27B	5874	O00194	0.141342	0.0841461	0.368137
SETD2.12647.52	SETD2	29072	Q9BYW2	-0.341376	0.0842834	0.368137
TMPRSS15.3189.61	TMPRSS15	5651	P98073	0.280765	0.0842855	0.368137
GDF9.3067.67	GDF9	2661	O60383	0.32072	0.0842973	0.368137
OLFM4.4769.10	OLFM4	10562	Q6UX06	0.256032	0.0844927	0.368182
PAX4.12398.15	PAX4		O43316	0.211708	0.0845438	0.368182
ZYX.13632.10	ZYX	7791	Q15942	-0.481108	0.0845735	0.368182
MTIF3.7852.9	MTIF3	219402	Q9H2K0	-0.778237	0.0846022	0.368182
C1QL4.7132.55	C1QL4	338761	Q86Z23	0.140993	0.0848817	0.368265
CCL28.2890.59	CCL28	56477	Q9NRJ3	0.63119	0.0850146	0.368265
CGA.CGB.4914.10	CGA CGB	1081 1082	P01215,P01233	-0.759066	0.0850886	0.368265
IQCF1.7991.54	IQCF1	132141	Q8N6M8	-0.197288	0.0851274	0.368265
RPN1.10490.3	RPN1	6184	P04843	0.365968	0.0851334	0.368265
MGAT4A.9392.43	MGAT4A	11320	Q9UM21	-0.37504	0.0851836	0.368265
TP53I3.17748.21	TP53I3	9540	Q53FA7	-0.398735	0.0852093	0.368265
EPHB2.8225.86	EPHB2	2048	P29323	0.300169	0.0852666	0.368265
PTGFRN.12727.7	PTGFRN		Q9P2B2	0.267319	0.0852846	0.368265
SPTLC2.7267.2	SPTLC2	9517	O15270	0.293347	0.0855676	0.368901
KPNA2.2860.19	KPNA2	3838	P52292	0.363861	0.0855797	0.368901
PRPSAP1.9478.69	PRPSAP1	5635	Q14558	-0.2217	0.0856766	0.369
CD93.14136.234	CD93	22918	Q9NPY3	0.334328	0.0858431	0.36908
SRC.15433.4	SRC	6714	P12931	-0.917503	0.0860281	0.36908
UNC93B1.13487.24	UNC93B1		Q9H1C4	0.360513	0.0860342	0.36908
CD68.18922.27	CD68	968	P34810	-0.348212	0.0860485	0.36908
AMY2B.15556.49	AMY2B	280	P19961	-0.457168	0.0860645	0.36908
SERPINA4.3449.58	SERPINA4	5267	P29622	-0.361547	0.0861597	0.369171
SCUBE1.8989.40	SCUBE1	80274	Q8IWY4	0.85107	0.0862985	0.369403
RAB3C.19586.89	RAB3C	115827	Q96E17	-0.746687	0.0865824	0.369403
MPL.3473.78	MPL	4352	P40238	-0.105342	0.0866573	0.369403
B3GNT2.7980.72	B3GNT2	10678	Q9NY97	-0.36647	0.0867463	0.369403
MAGEA3.12576.21	MAGEA3	4102	P43357	-0.223176	0.0867661	0.369403
CD320.16320.139	CD320	51293	Q9NPF0	0.611065	0.0868442	0.369403
MYOC.16558.2	MYOC	4653	Q99972	0.397165	0.086853	0.369403
CCDC101.12788.6	CCDC101		Q96ES7	0.156749	0.0869012	0.369403
IL12RB1.2632.5	IL12RB1	3594	P42701	0.221141	0.0869174	0.369403
CHST5.7020.13	CHST5	23563	Q9GZS9	0.161741	0.0870154	0.369403
PRPF6.9581.4	PRPF6	24148	O94906	-0.222537	0.0870616	0.369403
AK4.17432.25	AK4	205	P27144	-0.254206	0.0871122	0.369403
KLRB1.10809.14	KLRB1	3820	Q12918	0.200932	0.0872647	0.369403
CRISPLD2.5691.2	CRISPLD2	83716	Q9H0B8	0.568262	0.0872843	0.369403
AKT3.3392.68	AKT3	10000	Q9Y243	-0.411298	0.0873229	0.369403
ITGB5.7755.37	ITGB5	3693	P18084	0.175179	0.0878272	0.371069
GZMH.3373.5	GZMH	2999	P20718	0.238363	0.0878846	0.371069
TINAGL1.11192.168	TINAGL1	64129	Q9GZM7	0.301721	0.0879395	0.371069
ENPP7.4435.66	ENPP7	339221	Q6UWV6	0.807074	0.0881311	0.371335
UBQLN2.19121.3	UBQLN2	29978	Q9UHD9	0.310938	0.0881512	0.371335
IL31.10455.196	IL31	386653	Q6EBC2	-0.310209	0.0882709	0.37145
RGS5.16850.5	RGS5	8490	O15539	0.210705	0.0883565	0.37145
PRSS57.8351.17	PRSS57	400668	Q6UWY2	0.640221	0.0884933	0.37145
TST.12663.1	TST	7263	Q16762	0.527149	0.0885452	0.37145
CCL19.4922.13	CCL19	6363	Q99731	0.490282	0.0885502	0.37145
XRCC6.2835.1	XRCC6	2547	P12956	0.433409	0.088663	0.371581
PAFAH1B3.12374.8	PAFAH1B3		Q15102	-0.557467	0.0887301	0.371581
CFD.2946.52	CFD	1675	P00746	0.283293	0.0888068	0.37159
CSNK2A2.13681.173	CSNK2A2	1459	P19784	0.133097	0.0891087	0.372377
TNFRSF10A.4832.75	TNFRSF10A	8797	O00220	0.269194	0.0891439	0.372377
IL10RA.8104.21	IL10RA	3587	Q13651	-0.17123	0.089286	0.372466
MPZ.10615.18	MPZ	4359	P25189	0.377769	0.0893142	0.372466
ADAM17.8959.61	ADAM17	6868	P78536	0.150186	0.0894187	0.37259
S100Z.18928.10	S100Z	170591	Q8WXG8	-0.214618	0.089768	0.373683
AIMP1.2714.78	AIMP1	9255	Q12904	-0.184969	0.0898306	0.373683
FXR1.13076.4	FXR1		P51114	-0.443368	0.0901214	0.37432
SEMA4B.9805.51	SEMA4B	10509	Q9NPR2	0.224945	0.0902067	0.37432
CD8A.15462.28	CD8A	925	P01732	0.401153	0.0902085	0.37432
ERCC4.9895.77	ERCC4	2072	Q92889	0.254157	0.0905496	0.37532
NEU1.15426.5	NEU1	4758	Q99519	0.320434	0.0905997	0.37532
CHD7.14005.2	CHD7	55636	Q9P2D1	-0.0756523	0.090694	0.375348
SUMO3.14623.26	SUMO3	6613	P55854	0.354321	0.0908059	0.375348
MMP17.2838.53	MMP17	4326	Q9ULZ9	0.385083	0.0908317	0.375348
HN1.19335.2	HN1	51155	Q9UK76	-0.429318	0.0909604	0.37548
CSNK1G2.17436.193	CSNK1G2	1455	P78368	-0.472114	0.0910142	0.37548
SFRP4.17447.52	SFRP4	6424	Q6FHJ7	0.427991	0.0911255	0.37563
MMP8.9172.69	MMP8	4317	P22894	0.529817	0.0913061	0.376064
C5orf38.6378.2	C5orf38	153571	Q86SI9	-0.285906	0.0916871	0.37712
PPP2R5A.13622.16	PPP2R5A	5525	Q15172	-0.455327	0.0917868	0.37712
PYY.3727.35	PYY	5697	P10082	0.537789	0.091789	0.37712
CYTH2.12533.135	CYTH2		Q99418	0.134312	0.0919105	0.377309
TMEM185A.14633.26	TMEM185A		Q8NFB2	-0.163979	0.0920832	0.377708
HSPA1A.10749.18	HSPA1A	3303	P0DMV8	0.384085	0.0921854	0.377817
ATRN.15499.11	ATRN	8455	O75882	-0.225874	0.0922735	0.377837
HIST2H2BE.14143.8	HIST2H2BE	8349	Q16778	0.438275	0.0923444	0.377837
SYNGR3.13375.48	SYNGR3		O43761	-0.175972	0.0924174	0.377837
CMA1.3423.59	CMA1	1215	P23946	0.286538	0.0925296	0.377987
CSRP1.15529.33	CSRP1	1465	P21291	-0.827056	0.0927236	0.378159
RAB31.13597.20	RAB31	11031	Q13636	-0.533618	0.0928461	0.378159
CANT1.6480.1	CANT1	124583	Q8WVQ1	0.322491	0.0929222	0.378159
ADH1A.17396.23	ADH1A	124	P07327	-0.625032	0.0929513	0.378159
C22orf15.7073.69	C22orf15	150248	Q8WYQ4	0.101839	0.0930024	0.378159
DEFB129.8347.222	DEFB129	140881	Q9H1M3	0.138386	0.0930258	0.378159
MAPK3.2855.49	MAPK3	5595	P27361	-0.412188	0.0931733	0.37845
ZP4.7766.25	ZP4	57829	Q12836	0.254895	0.0934502	0.379046
CLIC1.5013.2	CLIC1	1192	O00299	-0.481959	0.0934716	0.379046
MLEC.6285.71	MLEC	9761	Q14165	-0.453028	0.094028	0.380993
VCAN.9561.21	VCAN	1462	P13611	-0.14008	0.0941385	0.381131
TMEM234.8107.12	TMEM234	56063	Q8WY98	-0.266683	0.0946444	0.382676
RPS6KA6.12688.115	RPS6KA6		Q9UK32	-0.265168	0.0946733	0.382676
KLK3.8468.19	KLK3	354	P07288	0.750228	0.0948115	0.382925
ARRB1.12643.4	ARRB1	408	P49407	-0.645573	0.0949212	0.383059
FGF3.7894.155	FGF3	2248	P11487	0.16191	0.0952086	0.383615
GZMK.9545.156	GZMK	3003	P49863	-0.522014	0.0952126	0.383615
MED4.14021.81	MED4		Q9NPJ6	-0.18014	0.0954308	0.384184
CFC1.3294.55	CFC1	55997	P0CG37	0.16465	0.0956619	0.384804
CCNA1.15319.226	CCNA1	8900	P78396	0.189893	0.0958493	0.385248
HRAS.18900.37	HRAS	3265	P01112	-0.164842	0.0960933	0.385518
HS3ST5.10731.10	HS3ST5	222537	Q8IZT8	-0.222599	0.096142	0.385518
MLF1.17820.170	MLF1	4291	P58340	-0.159697	0.096251	0.385518
AMH.4923.79	AMH	268	P03971	-0.22062	0.0962646	0.385518
SOCS3.11440.58	SOCS3	9021	O14543	-0.210505	0.0963024	0.385518
BRD1.11607.15	BRD1	23774	O95696	0.131523	0.0966266	0.386367
IL15.19568.17	IL15	3600	P40933	-0.328531	0.096669	0.386367
ALPP.7813.6	ALPP	250	P05187	-0.136024	0.0968688	0.386812
CNTN4.3298.52	CNTN4	152330	Q8IWV2	-0.307095	0.0969353	0.386812
CADM2.16907.3	CADM2	253559	Q8N3J6	0.312717	0.097119	0.386937
REXO2.13590.1	REXO2		Q9Y3B8	-0.356899	0.0971418	0.386937
ANXA7.14203.3	ANXA7	310	P20073	-0.377088	0.097199	0.386937
RTF1.7741.111	RTF1	23168	Q92541	0.435606	0.0975966	0.388095
CHST15.4469.78	CHST15	51363	Q7LFX5	0.281572	0.0976453	0.388095
IDI2.17832.12	IDI2	91734	Q9BXS1	0.493054	0.0980046	0.389001
CDK2.CCNA2.3357.67	CDK2 CCNA2	1017 890	P24941 P20248	0.238172	0.0980289	0.389001
GPC4.18892.48	GPC4	2239	O75487	0.248076	0.0982376	0.38952
VTA1.4209.60	VTA1	51534	Q9NP79	-0.488504	0.0983157	0.38952
ARL11.12433.8	ARL11	115761	Q969Q4	-0.265878	0.0984093	0.389582
ASPH.6998.106	ASPH	444	Q12797	0.148735	0.0986331	0.390152
TMEM237.12856.14	TMEM237		Q96Q45	0.111866	0.0987095	0.390152
CLEC11A.2966.65	CLEC11A	6320	Q9Y240	0.442289	0.0988511	0.390403
LYPD3.13107.9	LYPD3	27076	O95274	-0.243163	0.0989849	0.390469
SLC3A2.10430.31	SLC3A2	6520	P08195	-0.23189	0.099024	0.390469
SPINT1.2828.82	SPINT1	6692	O43278	-0.319456	0.0991097	0.390498
EBI3.10851.77	EBI3	10148	Q14213	0.54557	0.0992306	0.390667
EPDR1.9040.144	EPDR1	54749	Q9UM22	0.194361	0.0993437	0.390804
CELA1.6107.3	CELA1	1990	Q9UNI1	0.391111	0.0995429	0.39128
KAAG1.19492.5	KAAG1	353219	Q9UBP8	0.223841	0.099737	0.391734
DNAJA4.9744.139	DNAJA4	55466	Q8WW22	-0.261779	0.0999765	0.392367
JPH3.9089.77	JPH3	57338	Q8WXH2	-0.121983	0.100088	0.392496
CALCB.17170.15	CALCB	797	P10092	0.500092	0.100268	0.392894
BLVRA.11382.5	BLVRA	644	P53004	-0.443303	0.100539	0.393616
GAN.10054.3	GAN	8139	Q9H2C0	0.422322	0.10061	0.393616
SOSTDC1.8237.56	SOSTDC1	25928	Q6X4U4	-0.125989	0.100895	0.393659
FAM171A1.5610.32	FAM171A1	221061	Q5VUB5	-0.209048	0.100961	0.393659
TRH.5659.11	TRH	7200	P20396	0.149221	0.101035	0.393659
GALNT3.6593.5	GALNT3	2591	Q14435	0.184968	0.101097	0.393659
SEC22A.13713.164	SEC22A		Q96IW7	-0.28121	0.101125	0.393659
SYTL1.12892.10	SYTL1		Q8IYJ3	-0.111532	0.10117	0.393659
RHOA.9855.10	RHOA	387	P61586	-0.459208	0.101181	0.393659
CHST2.18863.176	CHST2	9435	Q9Y4C5	0.308288	0.101251	0.393659
PLG.3710.49	PLG	5340	P00747	-0.290342	0.10134	0.393699
RANBP1.18191.23	RANBP1	5902	P43487	-0.252669	0.101481	0.393791
KAL1.6603.18	KAL1	3730	P23352	-0.175571	0.101522	0.393791
NCAM2.6507.16	NCAM2	4685	O15394	-0.293712	0.101659	0.393841
TMEM87B.13485.20	TMEM87B		Q96K49	-0.248611	0.101753	0.393841
UBQLN4.12720.71	UBQLN4		Q9NRR5	0.331465	0.101771	0.393841
POMC.4890.10	POMC	5443	P01189	0.100056	0.101894	0.39401
HRG.4996.66	HRG	3273	P04196	-0.337973	0.102174	0.394591
SLITRK5.4568.17	SLITRK5	26050	O94991	0.327513	0.102202	0.394591
PNLIPRP1.6627.25	PNLIPRP1	5407	P54315	0.576932	0.102418	0.394755
NLGN2.9772.153	NLGN2	57555	Q8NFZ4	0.301006	0.102561	0.394755
PGLYRP3.10561.5	PGLYRP3	114771	Q96LB9	-0.430496	0.102569	0.394755
KIR3DL2.5096.51	KIR3DL2	3812	P43630	0.154508	0.102633	0.394755
NPFF.5617.41	NPFF	8620	O15130	-0.237158	0.102701	0.394755
ELL2.11494.4	ELL2		O00472	0.268986	0.102719	0.394755
PTHLH.2962.50	PTHLH	5744	P12272	0.136674	0.103005	0.395541
TBK1.3400.49	TBK1	29110	Q9UHD2	0.244414	0.103081	0.395541
RNASET2.16913.8	RNASET2	8635	O00584	0.331562	0.103294	0.396003
PGF.3078.1	PGF	5228	P49763	0.134414	0.10336	0.396003
PRDX6.5018.68	PRDX6	9588	P30041	-0.361604	0.103444	0.39602
NETO1.15298.199	NETO1	81832	Q8TDF5	0.406607	0.103554	0.396137
CHFR.11320.29	CHFR	55743	Q96EP1	-0.138134	0.103704	0.396237
MYC.10362.35	MYC	4609	P01106	-0.376566	0.103803	0.396237
ANAPC7.11690.47	ANAPC7	51434	Q9UJX3	0.148208	0.103864	0.396237
FLRT1.4547.59	FLRT1	23769	Q9NZU1	0.221189	0.103897	0.396237
DOCK9.14002.18	DOCK9		Q9BZ29	0.218613	0.104077	0.396619
ZWILCH.18302.204	ZWILCH	55055	Q9H900	-0.194501	0.104375	0.39704
CD72.7009.8	CD72	971	P21854	0.259293	0.104501	0.39704
HIST3H2BB.18823.52	HIST3H2BB	128312	Q8N257	0.543406	0.104501	0.39704
CHIT1.3600.2	CHIT1	1118	Q13231	-0.422964	0.104505	0.39704
KIR3DL3.8045.3	KIR3DL3	115653	Q8N743	-0.244749	0.104634	0.397228
NRCAM.5109.24	NRCAM	4897	Q92823	-0.230408	0.104824	0.397645
PECAM1.2695.25	PECAM1	5175	P16284	0.259678	0.105108	0.398302
CLEC11A.4500.50	CLEC11A	6320	Q9Y240	0.460184	0.105156	0.398302
FOXRED1.8017.23	FOXRED1	55572	Q96CU9	-0.305704	0.105378	0.398717
TDO2.9880.33	TDO2	6999	P48775	-0.361633	0.105541	0.398717
NSFL1C.4250.23	NSFL1C	55968	Q9UNZ2	0.342669	0.105553	0.398717
DNAJC15.7197.2	DNAJC15	29103	Q9Y5T4	0.214829	0.105585	0.398717
WFDC3.6384.19	WFDC3	140686	Q8IUB2	0.331549	0.105748	0.39903
MTCP1.19374.72	MTCP1		P56278	-0.3477	0.105985	0.399623
LANCL2.12628.31	LANCL2		Q9NS86	-0.462103	0.106167	0.400009
LCP1.17231.1	LCP1	3936	P13796	-0.334081	0.106404	0.4006
NFATC1.14286.2	NFATC1	4772	O95644	-0.136668	0.106757	0.401625
NMU.8754.5	NMU	10874	P48645	0.114136	0.106838	0.401626
SULT1A3.13944.3	SULT1A3	445329	P0DMM9	-0.669759	0.106948	0.401709
CUL3.10045.47	CUL3	8452	Q13618	-0.384103	0.107077	0.401709
COX7A1.8390.25	COX7A1	1346	P24310	-0.160391	0.107163	0.401709
WFIKKN1.3191.50	WFIKKN1	117166	Q96NZ8	0.164815	0.107181	0.401709
EMID1.9547.29	EMID1	129080	Q96A84	0.121022	0.107309	0.401888
UBE2E1.14326.4	UBE2E1	7324	P51965	0.32742	0.107672	0.402945
ECEL1.7076.17	ECEL1	9427	O95672	-0.171662	0.107804	0.402962
CR2.15570.99	CR2	1380	P20023	-0.441816	0.107838	0.402962
CALR.5264.65	CALR	811	P27797	0.205539	0.107985	0.403208
SCGB1D2.6508.68	SCGB1D2	10647	O95969	-0.225839	0.108145	0.40328
CASQ2.19291.2	CASQ2	845	O14958	0.115115	0.108165	0.40328
PTGS2.3761.4	PTGS2	5743	P35354	0.294623	0.108264	0.403344
STOM.8261.51	STOM	2040	P27105	0.12573	0.108409	0.403585
NPTX1.9256.78	NPTX1	4884	Q15818	-0.276801	0.108771	0.404496
PIAS3.13513.174	PIAS3		Q9Y6X2	0.274598	0.108848	0.404496
ATP1B1.13392.13	ATP1B1	481	P05026	-0.31903	0.109042	0.404496
GSTA4.14645.253	GSTA4		O15217	-0.233581	0.1091	0.404496
TNFSF4.2839.2	TNFSF4	7292	P23510	0.180839	0.109199	0.404496
DNAJB2.11438.6	DNAJB2		P25686	0.239324	0.109238	0.404496
LY6G6C.6256.9	LY6G6C	80740	O95867	0.362518	0.109275	0.404496
CGREF1.6257.56	CGREF1	10669	Q99674	0.272343	0.109301	0.404496
DKK2.15678.71	DKK2	27123	Q9UBU2	-0.652581	0.109573	0.405005
ENO2.10339.48	ENO2	2026	P09104	-0.315332	0.109601	0.405005
PAM.5620.13	PAM	5066	P19021	-0.16006	0.109918	0.405288
COL23A1.4543.65	COL23A1	91522	Q86Y22	0.224496	0.109953	0.405288
CYB5A.11287.14	CYB5A	1528	P00167	0.430756	0.109976	0.405288
TNC.5675.6	TNC	3371	P24821	0.40922	0.110002	0.405288
FLII.12677.164	FLII	2314	Q13045	0.279264	0.110178	0.405346
UNC5A.7975.97	UNC5A	90249	Q6ZN44	0.423878	0.11021	0.405346
BTC.13088.397	BTC	685	P35070	0.146788	0.110315	0.405346
SEC61B.7878.2	SEC61B	10952	P60468	0.56728	0.110358	0.405346
IL10RB.2631.50	IL10RB	3588	Q08334	0.175525	0.110423	0.405346
HOPX.19196.73	HOPX	84525	Q9BPY8	0.512825	0.110533	0.40545
SPINT3.7926.13	SPINT3	10816	P49223	0.743038	0.110635	0.405527
MBL2.3000.66	MBL2	4153	P11226	-0.548	0.110731	0.405582
CAMKK1.18860.2	CAMKK1	84254	Q8N5S9	-0.0894404	0.110978	0.406186
ANKRD1.15361.37	ANKRD1	27063	Q15327	-0.316368	0.111153	0.406457
SERPINF1.9211.19	SERPINF1	5176	P36955	0.152626	0.111214	0.406457
LACRT.7163.26	LACRT	90070	Q9GZZ8	-0.60123	0.111347	0.406645
ULK3.12437.18	ULK3		Q6PHR2	0.170711	0.111637	0.407234
MBTPS1.7240.2	MBTPS1	8720	Q14703	0.109548	0.111671	0.407234
GIP.16292.288	GIP	2695	P09681	0.31816	0.111922	0.407532
FGF8.2443.10	FGF8	2253	P55075	0.26862	0.111989	0.407532
PURB.18300.39	PURB	5814	Q96QR8	-0.367688	0.112028	0.407532
TNFRSF18.11837.7	TNFRSF18	8784	Q9Y5U5	-0.233028	0.112148	0.407532
KPNA6.13969.24	KPNA6		O60684	-0.404234	0.112312	0.407532
KIAA1161.8068.43	KIAA1161	57462	Q6NSJ0	-0.167006	0.112335	0.407532
SETMAR.12462.20	SETMAR		Q53H47	0.152834	0.112363	0.407532
TNC.6260.14	TNC	3371	P24821	0.317159	0.112454	0.407532
RND1.13574.50	RND1		Q92730	0.19363	0.112562	0.407532
DCBLD1.9402.18	DCBLD1	285761	Q8N8Z6	0.18341	0.112569	0.407532
SAT1.9859.180	SAT1	6303	P21673	0.111666	0.11302	0.408636
HSPA1A.14237.1	HSPA1A	3303	P0DMV8	-0.28078	0.113037	0.408636
SLC3A1.9000.177	SLC3A1	6519	Q07837	-0.390566	0.113171	0.408664
UFC1.3405.6	UFC1	51506	Q9Y3C8	0.269625	0.113209	0.408664
FOLR1.17455.42	FOLR1	2348	P15328	0.432002	0.113332	0.408751
LAT2.5613.75	LAT2	7462	Q9GZY6	-0.165913	0.113396	0.408751
ERO1L.7060.2	ERO1L	30001	Q96HE7	0.133523	0.113598	0.409182
MAGEA6.18205.123	MAGEA6	4105	P43360	0.130994	0.114065	0.410365
TCL1A.17210.2	TCL1A	8115	P56279	-0.174299	0.114091	0.410365
FRZB.13740.51	FRZB	2487	Q92765	0.60641	0.114337	0.410743
PGRMC1.7863.50	PGRMC1	10857	O00264	0.382998	0.114481	0.410743
MGA.11587.5	MGA		Q8IWI9	0.139791	0.114482	0.410743
PKD2.13486.9	PKD2		Q13563	-0.211298	0.114635	0.410743
LY86.3623.84	LY86	9450	O95711	-0.157113	0.114639	0.410743
POSTN.3457.57	POSTN	10631	Q15063	0.36497	0.114689	0.410743
CDH8.16021.30	CDH8	1006	P55286	-0.518623	0.115032	0.41154
SUV420H2.12452.32	SUV420H2		Q86Y97	0.202308	0.11509	0.41154
HSPA1A.4124.24	HSPA1A	3303	P0DMV8	0.334282	0.115179	0.41154
KLK5.3201.49	KLK5	25818	Q9Y337	0.115239	0.115241	0.41154
ZFAND1.19173.5	ZFAND1	79752	Q8TCF1	-0.429989	0.115425	0.411903
CNTN5.3299.29	CNTN5	53942	O94779	0.182033	0.11563	0.412147
PTPN6.4318.12	PTPN6	5777	P29350	0.339941	0.115718	0.412147
GSR.19273.3	GSR	2936	P00390	-0.238448	0.115741	0.412147
CDK2AP2.18227.3	CDK2AP2	10263	O75956	-0.163543	0.115867	0.412301
MDK.2911.27	MDK	4192	P21741	1.02187	0.116309	0.41313
UBE2V1.11626.7	UBE2V1	387522	Q13404	-0.373736	0.116322	0.41313
LANCL1.13986.6	LANCL1	10314	O43813	-0.341276	0.116348	0.41313
LCORL.4304.18	LCORL	254251	Q8N3X6	0.117556	0.11697	0.415044
PIWIL1.12793.4	PIWIL1		Q96J94	-0.120343	0.117128	0.415309
CLPS.5749.53	CLPS	1208	P04118	0.402828	0.117211	0.415309
NPNT.6342.10	NPNT	255743	Q6UXI9	-0.326262	0.117358	0.415327
MOBKL1A.19177.7	MOBKL1A	92597	Q7L9L4	-0.55422	0.117382	0.415327
PTCHD3.13517.3	PTCHD3		Q3KNS1	-0.383851	0.117702	0.416048
MILR1.11173.29	MILR1		Q7Z6M3	0.135523	0.117753	0.416048
ATP4B.9994.217	ATP4B	496	P51164	0.258617	0.117889	0.416234
APMAP.10605.22	APMAP	57136	Q9HDC9	0.315213	0.118143	0.416643
ARF5.18409.61	ARF5	381	P84085	-0.365335	0.118171	0.416643
SH3GLB1.16859.100	SH3GLB1	51100	Q9Y371	0.128679	0.118385	0.416856
PCDHGC5.7983.1	PCDHGC5	56097	Q9Y5F6	-0.0929221	0.118399	0.416856
NAP1L4.19188.21	NAP1L4	4676	Q99733	-0.497042	0.118593	0.417001
MAT2B.18392.19	MAT2B	27430	Q9NZL9	0.323208	0.118607	0.417001
FHIT.9826.135	FHIT	2272	P49789	-0.33378	0.118969	0.417845
HS6ST2.13524.25	HS6ST2		Q96MM7	0.439193	0.119014	0.417845
NFE2L1.11154.3	NFE2L1	4779	Q14494	0.260831	0.119767	0.420194
PRC1.15310.61	PRC1	9055	O43663	0.187189	0.119962	0.420372
PAPPA.4148.49	PAPPA	5069	Q13219	0.430181	0.119986	0.420372
YTHDC1.8878.48	YTHDC1	91746	Q96MU7	0.176492	0.120688	0.422535
ANXA4.17164.15	ANXA4	307	P09525	-0.428016	0.121259	0.424238
AMPD2.18403.25	AMPD2	271	Q01433	-0.504397	0.121581	0.425064
ARL3.12571.14	ARL3	403	P36405	-0.284053	0.121811	0.425307
RAB21.17514.48	RAB21	23011	Q9UL25	-0.409615	0.121899	0.425307
CTHRC1.15467.10	CTHRC1	115908	Q96CG8	0.246975	0.121946	0.425307
BTN2A1.8869.5	BTN2A1	11120	Q7KYR7	0.176831	0.121991	0.425307
ZNF180.12771.19	ZNF180	7733	Q9UJW8	0.0891924	0.12209	0.425357
TJP1.12001.7	TJP1	7082	Q07157	-0.234565	0.122243	0.425518
HYAL1.8309.12	HYAL1	3373	Q12794	-0.290317	0.122307	0.425518
SH2D1A.4567.82	SH2D1A	4068	O60880	0.272472	0.122471	0.42577
APOL3.16823.75	APOL3	80833	O95236	-0.36015	0.12255	0.42577
ERBB3.2617.56	ERBB3	2065	P21860	-0.250553	0.122799	0.426341
IL17RB.6262.14	IL17RB	55540	Q9NRM6	0.300055	0.122944	0.426547
ZNF329.12803.9	ZNF329		Q86UD4	0.202625	0.123132	0.426905
ACP1.3858.5	ACP1	52	P24666	-0.545378	0.123349	0.427357
ITGA5.6932.42	ITGA5	3678	P08648	0.13013	0.123582	0.427708
INPP5E.11370.20	INPP5E		Q9NRR6	-0.124857	0.123621	0.427708
PEAR1.8275.31	PEAR1	375033	Q5VY43	-0.220863	0.123805	0.428047
APRT.10088.37	APRT	353	P07741	-0.617879	0.124031	0.428535
C11orf73.8686.342	C11orf73	51501	Q53FT3	0.140689	0.124136	0.4286
SIGLEC11.8913.22	SIGLEC11	114132	Q96RL6	0.184739	0.124423	0.429074
SAA1.15515.2	SAA1	6288	P0DJI8	0.883894	0.1245	0.429074
NR1D1.5236.2	NR1D1	9572	P20393	0.116656	0.124531	0.429074
UCMA.10977.55	UCMA	221044	Q8WVF2	-0.393637	0.124635	0.429076
PAK6.3827.22	PAK6	56924	Q9NQU5	-0.650043	0.124703	0.429076
CYTL1.8402.22	CYTL1	54360	Q9NRR1	0.456995	0.12487	0.429115
GRAMD1C.8336.267	GRAMD1C	54762	Q8IYS0	0.148887	0.124935	0.429115
PHEX.18921.30	PHEX	5251	P78562	-0.133471	0.124972	0.429115
CCNH.9848.22	CCNH	902	P51946	0.479895	0.125358	0.429906
PMVK.12450.42	PMVK	10654	Q15126	-0.308201	0.125375	0.429906
IL22RA2.5087.5	IL22RA2	116379	Q969J5	-0.237667	0.12615	0.4322
CLEC6A.6911.103	CLEC6A	93978	Q6EIG7	-0.224584	0.126217	0.4322
MRC1.2637.77	MRC1	4360	P22897	0.380114	0.126617	0.433192
ELK3.5707.55	ELK3	2004	P41970	0.365175	0.126824	0.433192
SLC30A3.9081.39	SLC30A3	7781	Q99726	-0.240894	0.126826	0.433192
HIST1H1C.2987.37	HIST1H1C	3006	P16403	0.628763	0.126909	0.433192
PAPLN.11254.13	PAPLN	89932	O95428	0.135577	0.12694	0.433192
GLUL.19238.12	GLUL	2752	P15104	0.42549	0.127374	0.43373
EPB41L1.13993.20	EPB41L1		Q9H4G0	-0.424233	0.127395	0.43373
VARS.13083.18	VARS	7407	P26640	-0.283449	0.127458	0.43373
MNX1.9576.58	MNX1	3110	P50219	0.142037	0.127509	0.43373
SYNCRIP.4224.7	SYNCRIP	10492	O60506	-0.297325	0.12761	0.43373
KL.15384.15	KL	9365	Q9UEF7	-0.297329	0.127754	0.43373
CA9.3798.71	CA9	768	Q16790	0.208198	0.127829	0.43373
CD160.17677.47	CD160	11126	O95971	0.500942	0.127843	0.43373
CA1.4969.2	CA1	759	P00915	-0.406234	0.127879	0.43373
SCP2D1.14175.78	SCP2D1		Q9UJQ7	0.605107	0.128141	0.434044
GUK1.17325.10	GUK1	2987	Q16774	-0.311237	0.128146	0.434044
UBE2N.3905.62	UBE2N	7334	P61088	-0.281377	0.128275	0.434189
TCN2.15560.52	TCN2	6948	P20062	-2.21527	0.128367	0.434206
PAXIP1.12894.3	PAXIP1		Q6ZW49	-0.223048	0.128857	0.435568
JUN.10356.21	JUN	3725	P05412	-0.143197	0.129147	0.436253
CEBPA.18874.66	CEBPA	1050	P49715	0.254685	0.12942	0.436534
CACNA2D3.8885.6	CACNA2D3	55799	Q8IZS8	-0.193228	0.129439	0.436534
SDCBP.17806.6	SDCBP	6386	O00560	0.43475	0.129492	0.436534
NDE1.9765.4	NDE1	54820	Q9NXR1	0.131025	0.129683	0.436698
ROBLD3.15329.167	ROBLD3	28956	Q9Y2Q5	0.157472	0.129716	0.436698
DDR1.4122.12	DDR1	780	Q08345	0.174423	0.130048	0.437521
NADK.13624.17	NADK		O95544	0.740774	0.130229	0.437835
MFAP3L.8837.8	MFAP3L	9848	O75121	-0.16229	0.130331	0.437884
SMTN.12546.1	SMTN	6525	P53814	0.388863	0.130513	0.437889
ENTHD2.7947.19	ENTHD2	146705	Q96N21	-0.120261	0.130548	0.437889
CAP1.12034.28	CAP1	10487	Q01518	-0.75873	0.130606	0.437889
CFHR1.15468.14	CFHR1	100293069	Q03591	-0.336259	0.130729	0.437889
PPM1L.7187.3	PPM1L	151742	Q5SGD2	-0.176724	0.130795	0.437889
OLFML3.8660.5	OLFML3	56944	Q9NRN5	0.265859	0.130858	0.437889
KCNMB3.8905.20	KCNMB3	27094	Q9NPA1	-0.21863	0.131527	0.439831
KLRF1.5098.79	KLRF1	51348	Q9NZS2	0.085878	0.131652	0.439956
HBB.17137.160	HBB	3043	P68871	-0.71487	0.131938	0.440615
IGFL3.6961.14	IGFL3	388555	Q6UXB1	-0.261639	0.132125	0.440809
PRND.18231.147	PRND	23627	Q9UKY0	-0.188338	0.132198	0.440809
PSD2.9118.7	PSD2	84249	Q9BQI7	-0.289669	0.13226	0.440809
CD226.5062.60	CD226	10666	Q15762	0.177508	0.132452	0.440928
SCO1.7853.19	SCO1	6341	O75880	-0.118411	0.132473	0.440928
CD3E.8069.85	CD3E	916	P07766	-0.300839	0.132912	0.441372
CD81.19612.3	CD81	975	P60033	-0.0968202	0.132936	0.441372
CKAP4.7221.56	CKAP4	10970	Q07065	0.102833	0.132938	0.441372
GOSR2.10426.21	GOSR2	9570	O14653	-0.305379	0.13302	0.441372
DEFB121.5765.53	DEFB121	245934	Q5J5C9	-0.332135	0.133157	0.441372
YBX1.9751.72	YBX1	4904	P67809	0.430849	0.133288	0.441372
HLA.DRB3.6962.5	HLA-DRB3	3125	P79483	-0.238582	0.133304	0.441372
ANGPTL4.3796.79	ANGPTL4	51129	Q9BY76	0.322214	0.133456	0.441372
GFRA3.2505.49	GFRA3	2676	O60609	0.293407	0.1335	0.441372
DEFA1.19579.5	DEFA1	1667	P59665	0.0958803	0.133546	0.441372
RALB.18432.32	RALB	5899	P11234	-0.411636	0.133578	0.441372
BTNL3.10848.137	BTNL3	10917	Q6UXE8	0.0958642	0.133701	0.441488
TP53I11.13022.20	TP53I11		O14683	-0.657084	0.133852	0.441693
GAD1.11280.6	GAD1		Q99259	-0.196482	0.134092	0.442192
CSNK2A1.3427.63	CSNK2A1	1457	P68400	0.158107	0.134483	0.442993
SMAD3.10363.13	SMAD3	4088	P84022	-0.373354	0.134512	0.442993
PCDH10.9018.38	PCDH10	57575	Q9P2E7	0.247755	0.134686	0.443275
PLA2G2C.8850.5	PLA2G2C	391013	Q5R387	0.198042	0.134932	0.443793
SYK.11378.37	SYK	6850	P43405	-0.530418	0.1353	0.444709
GFRA2.2515.14	GFRA2	2675	O00451	0.241135	0.135508	0.444861
LGR4.16304.6	LGR4		Q9BXB1	0.192005	0.135524	0.444861
UBE3A.11226.16	UBE3A		Q05086	-0.230193	0.136017	0.446185
WDR5.17760.128	WDR5	11091	P61964	0.260119	0.136523	0.446654
CCDC90B.7792.58	CCDC90B	60492	Q9GZT6	0.204706	0.136595	0.446654
KREMEN2.3202.28	KREMEN2	79412	Q8NCW0	0.248388	0.1366	0.446654
RHOG.12540.25	RHOG		P84095	-0.1753	0.136639	0.446654
CPB1.15375.49	CPB1	1360	P15086	0.500889	0.136686	0.446654
DUSP23.17326.44	DUSP23		Q9BVJ7	0.177042	0.136727	0.446654
PCSK7.4459.68	PCSK7	9159	Q16549	0.27896	0.136829	0.446654
CFI.2567.5	CFI	3426	P05156	-0.135268	0.137024	0.446654
CD14.16914.104	CD14	929	P08571	0.212649	0.137093	0.446654
FGFBP1.15494.11	FGFBP1	9982	Q14512	1.06738	0.137111	0.446654
SERPINA11.9002.36	SERPINA11	256394	Q86U17	-0.319622	0.137143	0.446654
ADH4.8325.37	ADH4	127	P08319	-0.642479	0.137369	0.4471
ARHGEF10.9061.3	ARHGEF10	9639	O15013	-0.152856	0.137586	0.447189
VTI1B.8963.8	VTI1B	10490	Q9UEU0	0.328455	0.137596	0.447189
CSNK2A1.CSNK2B.5225.50	CSNK2A1 CSNK2B	1457 1460	P68400 P67870	-0.390169	0.137771	0.447189
GRP.5897.58	GRP	2922	P07492	-0.160605	0.137809	0.447189
ARPC5.18419.20	ARPC5	10092	O15511	-0.502201	0.137844	0.447189
TICAM2.17696.1	TICAM2	100302736	Q86XR7	-0.377664	0.138057	0.447587
RNF215.9064.12	RNF215	200312	Q9Y6U7	-0.266963	0.138746	0.448187
CKMT2.18197.97	CKMT2	1160	P17540	-0.151622	0.138819	0.448187
NUDT1.19206.20	NUDT1	4521	P36639	0.220113	0.138943	0.448187
FGF23.3807.1	FGF23	8074	Q9GZV9	0.246798	0.139117	0.448187
SPEF1.12876.39	SPEF1	25876	Q9Y4P9	-0.106639	0.139141	0.448187
AZGP1.9312.8	AZGP1	563	P25311	0.187721	0.139196	0.448187
SPRN.13447.42	SPRN		Q5BIV9	0.436252	0.139204	0.448187
LIFR.5837.49	LIFR	3977	P42702	-0.277472	0.139228	0.448187
MCL1.9819.110	MCL1	4170	Q07820	0.221568	0.139322	0.448187
TERF1.10049.112	TERF1	7013	P54274	0.0819135	0.139374	0.448187
EVPL.14019.73	EVPL		Q92817	0.234939	0.139543	0.448187
IST1.12434.25	IST1	9798	P53990	-0.263432	0.139629	0.448187
UGT1A8.8899.75	UGT1A8	54576	Q9HAW9	0.201873	0.139795	0.448187
PARP11.12882.7	PARP11		Q9NR21	0.324165	0.139849	0.448187
OPTC.15430.165	OPTC	26254	Q9UBM4	-0.158885	0.13985	0.448187
SFRP1.3221.54	SFRP1	6422	Q8N474	0.948964	0.139894	0.448187
TIMM8A.19148.58	TIMM8A	1678	O60220	0.277675	0.139913	0.448187
RLN3.6027.31	RLN3	117579	Q8WXF3	-0.159013	0.139914	0.448187
DOK2.14246.50	DOK2	9046	O60496	-0.473606	0.139985	0.448187
MSTN.14583.49	MSTN	2660	O14793	-0.294558	0.140266	0.448187
NQO2.9754.33	NQO2	4835	P16083	-0.379697	0.140268	0.448187
ZWINT.18286.3	ZWINT	11130	O95229	0.480157	0.140294	0.448187
CHI3L1.11104.13	CHI3L1	1116	P36222	0.682554	0.140322	0.448187
JAG2.5093.47	JAG2	3714	Q9Y219	0.120147	0.140496	0.448187
PDIA4.7146.16	PDIA4	9601	P13667	0.139711	0.140611	0.448187
TNFAIP8.12563.2	TNFAIP8		O95379	-0.398635	0.140657	0.448187
PPIL1.9884.8	PPIL1	51645	Q9Y3C6	-0.203067	0.140669	0.448187
CRP.4337.49	CRP	1401	P02741	0.303448	0.140754	0.448187
CSPG4.8951.162	CSPG4	1464	Q6UVK1	-0.181685	0.140909	0.448397
KPNA1.19587.12	KPNA1	3836	P52294	-0.199636	0.141019	0.448461
KLRK1.14095.1	KLRK1	22914	P26718	-0.174824	0.141254	0.448921
MARK3.9747.48	MARK3	4140	P27448	-0.223648	0.141438	0.44906
GIP.5755.29	GIP	2695	P09681	0.16369	0.141511	0.44906
HCK.3374.49	HCK	3055	P08631	0.0783379	0.141567	0.44906
PABPN1.8921.139	PABPN1	8106	Q86U42	0.425209	0.141761	0.44939
SHH.2743.5	SHH	6469	Q15465	-0.312545	0.142046	0.450008
ASAH1.5748.20	ASAH1	427	Q13510	0.282812	0.142769	0.451624
AS3MT.18417.3	AS3MT	57412	Q9HBK9	-0.147375	0.142823	0.451624
GALNT2.5764.4	GALNT2	2590	Q10471	-0.203177	0.142827	0.451624
G6B.7065.1	G6B	80739	O95866	-0.538034	0.143106	0.452219
RND3.15439.21	RND3	390	P61587	-0.110433	0.14358	0.453429
LAMA4.6577.64	LAMA4	3910	Q16363	0.158209	0.14407	0.454688
MUTED.19116.1	MUTED	63915	Q8TDH9	0.121709	0.144372	0.454923
RHOC.17764.108	RHOC	389	P08134	-0.511192	0.144548	0.454923
AKR7A2.4188.1	AKR7A2	8574	O43488	-0.477937	0.144625	0.454923
TAPBP.12378.71	TAPBP	6892	O15533	0.386965	0.144639	0.454923
CLEC4A.8853.2	CLEC4A	50856	Q9UMR7	-0.133293	0.144663	0.454923
LCN1.11708.2	LCN1	3933	P31025	0.342184	0.144714	0.454923
COL20A1.8804.39	COL20A1	57642	Q9P218	-0.122229	0.144831	0.454923
SMAD2.10364.6	SMAD2	4087	Q15796	-0.43265	0.144915	0.454923
SNTA1.19274.80	SNTA1	6640	Q13424	-0.486664	0.144963	0.454923
VAPB.7181.17	VAPB	9217	O95292	-0.0674368	0.145244	0.455167
MMP1.4924.32	MMP1	4312	P03956	-0.526915	0.145297	0.455167
CHKB.7761.125	CHKB	1120	Q9Y259	-0.277073	0.145314	0.455167
CBLN1.9313.27	CBLN1	869	P23435	-0.399773	0.145582	0.455334
COL6A1.16828.8	COL6A1	1291	P12109	0.574672	0.145629	0.455334
TALDO1.11347.9	TALDO1	6888	P37837	0.303814	0.145641	0.455334
RBM3.12747.89	RBM3	5935	P98179	0.323473	0.145966	0.456063
TNKS.9907.216	TNKS	8658	O95271	0.136249	0.146141	0.456327
ITIH4.4811.33	ITIH4	3700	Q14624	0.177731	0.146505	0.456914
VWA2.7128.9	VWA2	340706	Q5GFL6	-0.223793	0.146581	0.456914
UAP1.13580.2	UAP1	6675	Q16222	-0.183932	0.146604	0.456914
DNAJC17.14655.1	DNAJC17		Q9NVM6	-0.245307	0.146867	0.457448
TMEM38B.9509.4	TMEM38B	55151	Q9NVV0	0.261336	0.147068	0.45779
MFRP.3685.53	MFRP	83552	Q9BY79	0.292076	0.147398	0.458162
CHRD.13438.115	CHRD	8646	Q9H2X0	0.405625	0.147411	0.458162
EPHA5.3806.55	EPHA5	2044	P54756	0.162902	0.147541	0.458162
DMKN.5963.9	DMKN	93099	Q6E0U4	-0.153899	0.147554	0.458162
CDC2.CCNB1.3422.4	CDC2 CCNB1	983 891	P06493 P14635	0.139991	0.147827	0.458237
SDC3.16612.28	SDC3	9672	O75056	-0.216309	0.147861	0.458237
IL22RA1.3620.67	IL22RA1	58985	Q8N6P7	0.307237	0.148009	0.458237
RGS8.11666.72	RGS8		P57771	-0.163498	0.148104	0.458237
GAS7.17721.82	GAS7	8522	O60861	0.226083	0.148115	0.458237
RCN3.16858.384	RCN3		Q96D15	0.119664	0.148129	0.458237
BLMH.14250.115	BLMH	642	Q13867	0.144002	0.148422	0.458438
TBX22.11146.4	TBX22		Q9Y458	0.106744	0.148426	0.458438
FCN3.5462.62	FCN3	8547	O75636	-0.213366	0.148469	0.458438
RCAN1.13465.5	RCAN1	1827	P53805	-0.451645	0.148696	0.458853
CDKN1A.18291.8	CDKN1A	1026	P38936	0.135609	0.148842	0.459022
PECR.17776.15	PECR	55825	Q9BY49	0.103301	0.149438	0.460572
STX1B.6966.144	STX1B	112755	P61266	0.092768	0.149567	0.460572
ISLR2.13124.20	ISLR2	57611	Q6UXK2	-0.233516	0.149626	0.460572
PGRMC2.8681.93	PGRMC2	10424	O15173	-0.145152	0.149713	0.460572
EIF4E.19263.147	EIF4E	1977	P06730	-0.252369	0.149913	0.460901
VCL.8750.46	VCL	7414	P18206	0.181542	0.150357	0.461771
B3GNT8.9297.12	B3GNT8	374907	Q7Z7M8	-0.339921	0.15038	0.461771
ARL6IP5.13503.19	ARL6IP5	10550	O75915	-0.659403	0.150703	0.462365
ILF2.12665.16	ILF2	3608	Q12905	-0.116201	0.150759	0.462365
PTPN9.12633.3	PTPN9		P43378	-0.105652	0.151043	0.462952
TNFSF8.3421.54	TNFSF8	944	P32971	0.275117	0.151627	0.46429
PYCR2.18328.36	PYCR2	29920	Q96C36	-0.232924	0.151666	0.46429
GRAMD1C.8842.16	GRAMD1C	54762	Q8IYS0	0.137279	0.151907	0.464745
IGHD.IGK.IGL.4916.2	IGHD IGK@ IGL@	3495 50802 3535	P01880	-0.919156	0.152295	0.46554
BRAT1.10876.300	BRAT1	221927	Q6PJG6	0.192608	0.152353	0.46554
NLRP1.11661.11	NLRP1		Q9C000	-0.161486	0.152627	0.465879
ARHGDIA.6454.38	ARHGDIA	396	P52565	0.208037	0.152723	0.465879
PDGFRL.9713.67	PDGFRL	5157	Q15198	0.571839	0.152744	0.465879
CRCP.17771.35	CRCP	27297	O75575	-0.105126	0.153055	0.466403
GDI1.16810.3	GDI1	2664	P31150	-0.286405	0.153103	0.466403
L3MBTL2.12708.91	L3MBTL2		Q969R5	-0.175388	0.1532	0.466416
DUSP28.9940.35	DUSP28	285193	Q4G0W2	-0.544743	0.153333	0.466537
RNF128.6510.56	RNF128	79589	Q8TEB7	0.148542	0.153679	0.467304
SMPD1.10818.36	SMPD1	6609	P17405	-0.307304	0.154266	0.468804
MUTYH.10030.8	MUTYH	4595	Q9UIF7	-0.258805	0.154513	0.468817
CRISP3.3187.52	CRISP3	10321	P54108	0.117603	0.154538	0.468817
CST2.4324.33	CST2	1470	P09228	0.543027	0.154552	0.468817
WNT10A.10044.12	WNT10A	80326	Q9GZT5	-0.28391	0.154659	0.468856
INSRR.6352.8	INSRR	3645	P14616	-0.268702	0.154983	0.469454
OTUB2.12493.42	OTUB2		Q96DC9	-0.116695	0.155044	0.469454
C1orf198.8035.6	C1orf198	84886	Q9H425	0.30825	0.155187	0.469569
PKN1.12562.1	PKN1	5585	Q16512	-0.147641	0.15527	0.469569
PCBP1.11458.30	PCBP1	5093	Q15365	-0.30918	0.155456	0.46984
CHGA.8476.11	CHGA	1113	P10645	0.324573	0.155547	0.46984
LYN.3381.24	LYN	4067	P07948	-0.547559	0.156566	0.472632
SPARCL1.4467.49	SPARCL1	8404	Q14515	0.277409	0.156903	0.473271
MDH2.15534.26	MDH2	4191	P40926	-0.460042	0.156968	0.473271
STK24.12617.2	STK24	8428	Q9Y6E0	-0.546459	0.157093	0.473364
HBA1.HBB.4915.64	HBA1 HBB	3039 3043	P69905, P68871	-1.05898	0.157338	0.473817
ADAMDEC1.9115.78	ADAMDEC1	27299	O15204	0.247729	0.157509	0.474044
GPR56.18893.26	GPR56	9289	Q9Y653	-0.307007	0.157914	0.474788
SSU72.13566.2	SSU72		Q9NP77	-0.282047	0.157946	0.474788
CUBN.12904.180	CUBN	8029	O60494	-0.130912	0.158403	0.475874
HMGA1.16536.3	HMGA1	3159	P17096	0.183125	0.158763	0.476672
CEBPB.15675.3	CEBPB	1051	P17676	-0.224697	0.159062	0.477101
CD5.5596.75	CD5	921	P06127	0.277209	0.159097	0.477101
SUB1.19236.24	SUB1	10923	P53999	0.548203	0.159573	0.478219
AASDHPPT.17320.19	AASDHPPT	60496	Q9NRN7	-0.275579	0.159737	0.478219
SH3BGRL3.17490.4	SH3BGRL3	83442	Q9H299	0.35785	0.159829	0.478219
FATE1.7740.33	FATE1	89885	Q969F0	0.165685	0.160041	0.478219
ADCYAP1.8450.36	ADCYAP1	116	P18509	0.0855557	0.160106	0.478219
SSMEM1.8298.8	SSMEM1	136263	Q8WWF3	-0.27595	0.160115	0.478219
MAN2B2.9251.28	MAN2B2	23324	Q9Y2E5	0.273216	0.16014	0.478219
NOTCH2.11297.54	NOTCH2	4853	Q04721	-0.228382	0.160251	0.478234
RFFL.14186.13	RFFL		Q8WZ73	-0.565132	0.160431	0.478234
BPIFA1.6473.55	BPIFA1	51297	Q9NP55	0.159601	0.160507	0.478234
FLT3LG.14093.10	FLT3LG	2323	P49771	0.153438	0.160528	0.478234
TMEM25.9014.18	TMEM25	84866	Q86YD3	-0.136079	0.161322	0.480313
SERPINA1.3580.25	SERPINA1	5265	P01009	0.199494	0.161628	0.480937
LIPK.6413.79	LIPK	643414	Q5VXJ0	0.113526	0.161859	0.481098
PPP3R2.18866.8	PPP3R2	5535	Q96LZ3	-0.212599	0.161875	0.481098
APBB2.12761.12	APBB2	323	Q92870	-0.231272	0.16199	0.481154
TREML1.11147.17	TREML1	340205	Q86YW5	-0.236254	0.162277	0.481347
FOLR3.15495.9	FOLR3	2352	P41439	0.847277	0.16231	0.481347
P4HB.4278.14	P4HB	5034	P07237	0.129301	0.162505	0.481347
IARS.12815.9	IARS	3376	P41252	-0.15724	0.1626	0.481347
CCDC51.12790.10	CCDC51		Q96ER9	-0.167352	0.16265	0.481347
SULT1B1.12671.35	SULT1B1		O43704	-0.353338	0.162692	0.481347
ALDH5A1.17792.158	ALDH5A1	7915	P51649	-0.338708	0.162729	0.481347
MRPL14.8021.59	MRPL14	64928	Q6P1L8	0.409582	0.162831	0.481365
PHGDH.15548.35	PHGDH	26227	O43175	-0.273803	0.163045	0.481709
TYMS.5035.7	TYMS	7298	P04818	0.202837	0.163243	0.481748
ANK2.7624.19	ANK2	287	Q01484	0.256049	0.16325	0.481748
HTATIP2.7753.21	HTATIP2	10553	Q9BUP3	-0.372979	0.163461	0.482085
DARS2.12395.86	DARS2		Q6PI48	-0.761766	0.163587	0.48217
LST1.9531.24	LST1	7940	O00453	0.334822	0.163965	0.482558
PRDX4.7789.182	PRDX4	10549	Q13162	0.196037	0.163992	0.482558
CTSE.15376.134	CTSE	1510	P14091	0.160131	0.164114	0.482558
CHMP2A.17728.61	CHMP2A	27243	O43633	-0.394709	0.164169	0.482558
DCTPP1.4314.12	DCTPP1	79077	Q9H773	0.365735	0.164201	0.482558
CD86.5337.64	CD86	942	P42081	-0.183192	0.164659	0.48319
PDE3A.5254.69	PDE3A	5139	Q14432	0.0979237	0.164704	0.48319
GALE.11457.53	GALE	2582	Q14376	-0.200098	0.164706	0.48319
PCBD2.6899.37	PCBD2	84105	Q9H0N5	-0.346583	0.164845	0.483313
CYB5R2.19143.38	CYB5R2	51700	Q6BCY4	0.289016	0.165084	0.48372
KLK10.6227.1	KLK10	5655	O43240	0.372234	0.165177	0.48372
TNFAIP6.5036.50	TNFAIP6	7130	P98066	0.307071	0.165324	0.483864
PSD.13055.53	PSD		A5PKW4	-0.304199	0.165741	0.484803
NDST1.6927.7	NDST1	3340	P52848	-0.206529	0.166114	0.485395
DSC1.10882.12	DSC1	1823	Q08554	-0.23448	0.166138	0.485395
FAM69C.14341.8	FAM69C		Q0P6D2	-0.117966	0.166478	0.486105
CTRB1.5671.1	CTRB1	1504	P17538	0.502592	0.166629	0.48626
CDC42BPB.3629.60	CDC42BPB	9578	Q9Y5S2	0.22483	0.166843	0.486602
CCDC50.12399.194	CCDC50	152137	Q8IVM0	0.293313	0.166998	0.48668
ARSA.3583.54	ARSA	410	P15289	0.24789	0.167065	0.48668
SUSD1.9582.93	SUSD1	64420	Q6UWL2	-0.103517	0.167189	0.486757
POGLUT1.6467.65	POGLUT1	56983	Q8NBL1	-0.545317	0.167522	0.487431
PRR16.10621.26	PRR16	51334	Q569H4	-0.441924	0.167615	0.487431
MFAP2.9294.45	MFAP2	4237	P55001	0.320389	0.167847	0.487758
POU2F1.11715.1	POU2F1		P14859	-0.0889371	0.167977	0.487758
RAB32.17778.19	RAB32	10981	Q13637	-0.794265	0.168086	0.487758
DNAJB4.18884.22	DNAJB4	11080	Q9UDY4	-0.308826	0.168118	0.487758
WNK3.5493.17	WNK3	65267	Q9BYP7	-0.272268	0.168305	0.488017
RCL.17785.11	RCL	10591	O43598	-0.200477	0.168462	0.488045
YY1.17337.1	YY1	7528	P25490	-0.218186	0.168564	0.488045
CLEC1B.4332.6	CLEC1B	51266	Q9P126	-0.439975	0.168608	0.488045
SIRPA.5430.66	SIRPA	140885	P78324	0.505432	0.168772	0.488236
ZNF264.9993.11	ZNF264	9422	O43296	0.210829	0.169091	0.488811
FAM177A1.8039.41	FAM177A1	283635	Q8N128	-0.240566	0.169197	0.488811
EIF2S1.19259.176	EIF2S1	1965	P05198	-0.297394	0.169264	0.488811
FBL.13994.1	FBL		P22087	0.213602	0.169558	0.48932
PIN1.15474.7	PIN1	5300	Q13526	-0.303665	0.169665	0.48932
INSL4.6410.26	INSL4	3641	Q14641	0.155792	0.169734	0.48932
TMOD1.12595.11	TMOD1	7111	P28289	-0.349671	0.170844	0.492234
PKM2.4240.31	PKM2	5315	P14618	-0.666311	0.171047	0.492537
SOD1.2794.60	SOD1	6647	P00441	0.30146	0.171299	0.49285
EZR.9753.17	EZR	7430	P15311	-0.334343	0.171353	0.49285
FCER1A.9254.18	FCER1A	2205	P12319	-0.250399	0.171464	0.492874
PROK1.2247.20	PROK1	84432	P58294	0.0720549	0.171559	0.492874
LRFN2.7200.4	LRFN2	57497	Q9ULH4	-0.443224	0.171876	0.493502
NRXN1.8971.9	NRXN1	9378	Q9ULB1	-0.450206	0.172501	0.495011
MATK.3823.9	MATK	4145	P42679	0.23199	0.172858	0.495495
CLC.11094.104	CLC	1178	Q05315	-0.107155	0.172868	0.495495
PES1.4267.81	PES1	23481	O00541	0.205841	0.173123	0.495841
VPS4B.12668.7	VPS4B		O75351	-0.14542	0.173206	0.495841
SYT17.9110.2	SYT17	51760	Q9BSW7	0.165368	0.173286	0.495841
HDLBP.13570.43	HDLBP	3069	Q00341	0.150785	0.173512	0.496204
HOMER2.12685.57	HOMER2		Q9NSB8	-0.345039	0.173754	0.496498
RPS6KB1.8962.48	RPS6KB1	6198	P23443	-0.301957	0.17388	0.496498
MAPK1.3115.64	MAPK1	5594	P28482	-0.298875	0.173913	0.496498
IMPA1.17796.15	IMPA1	3612	P29218	0.274251	0.174098	0.496741
LTA.4703.87	LTA	4049	P01374	0.146978	0.174361	0.497013
ACBD6.19341.36	ACBD6	84320	Q9BR61	0.187258	0.174392	0.497013
RBBP4.15331.47	RBBP4	5928	Q09028	0.477268	0.174622	0.497304
S100A16.17836.17	S100A16	140576	Q96FQ6	0.197167	0.174693	0.497304
AKR1C3.17377.1	AKR1C3	8644	P42330	-0.226445	0.174991	0.497866
ICOSLG.5061.27	ICOSLG	23308	O75144	0.381408	0.17521	0.498011
PYCR1.18170.46	PYCR1	5831	P32322	0.246221	0.175241	0.498011
SUN3.8852.10	SUN3	256979	Q8TAQ9	-0.25836	0.175736	0.498981
TCL1B.18276.34	TCL1B	9623	O95988	0.21224	0.175784	0.498981
IL17A.9170.24	IL17A	3605	Q16552	0.110479	0.175926	0.498981
PDLIM4.12387.7	PDLIM4	8572	P50479	0.368602	0.176001	0.498981
SMIM24.7108.7	SMIM24	284422	O75264	0.0843186	0.176241	0.498981
ATP1B2.7218.87	ATP1B2	482	P14415	-0.33276	0.176383	0.498981
NMI.17512.2	NMI	9111	Q13287	-0.335887	0.176449	0.498981
SLITRK3.10565.19	SLITRK3	22865	O94933	0.420858	0.176497	0.498981
IL18RAP.2993.1	IL18RAP	8807	O95256	0.108252	0.176545	0.498981
SLC30A5.9594.30	SLC30A5	64924	Q8TAD4	-0.33989	0.176581	0.498981
SRP19.18257.64	SRP19	6728	P09132	0.334884	0.17688	0.499545
A1CF.12423.38	A1CF	29974	Q9NQ94	0.436837	0.177269	0.500077
CFAP45.6553.68	CFAP45	25790	Q9UL16	-0.39236	0.177269	0.500077
POLR2J.19199.3	POLR2J	5439	P52435	0.0867954	0.177427	0.500239
IL5.11071.1	IL5	3567	P05113	-0.178683	0.17758	0.500388
ZG16B.8310.6	ZG16B	124220	Q96DA0	0.312752	0.177957	0.501169
NAP1L1.13636.20	NAP1L1	4673	P55209	-0.381127	0.178116	0.501335
ACOT13.17675.17	ACOT13	55856	Q9NPJ3	-0.612363	0.178258	0.501451
RPS3A.5484.63	RPS3A	6189	P61247	-0.292801	0.178412	0.501602
ARL9.18416.3	ARL9	132946	Q6T311	0.149465	0.17865	0.501989
BMP4.6326.20	BMP4	652	P12644	-0.194895	0.179317	0.50346
DLD.15527.90	DLD	1738	P09622	-0.33433	0.179375	0.50346
DUSP3.3480.7	DUSP3	1845	P51452	0.232651	0.179557	0.503687
PRRG1.9008.6	PRRG1	5638	O14668	0.126622	0.180074	0.504656
EPHA7.15580.2	EPHA7	2045	Q15375	0.172848	0.180153	0.504656
SLC5A5.12826.5	SLC5A5		Q92911	-0.621826	0.180264	0.504656
MFNG.5605.77	MFNG	4242	O00587	-0.29232	0.180363	0.504656
SNRPF.5494.52	SNRPF	6636	P62306	-0.248858	0.180407	0.504656
CHST3.7189.55	CHST3	9469	Q7LGC8	0.098395	0.181152	0.506455
CXCL8.3447.64	CXCL8	3576	P10145	0.341592	0.181292	0.506563
EDDM3B.7782.34	EDDM3B	64184	P56851	0.0956535	0.181544	0.506839
DCUN1D1.17366.6	DCUN1D1	54165	Q96GG9	-0.211006	0.181613	0.506839
ARL2.12587.65	ARL2	402	P36404	-0.220376	0.181777	0.506839
TNFSF14.5988.49	TNFSF14	8740	O43557	-0.105209	0.181797	0.506839
TPMT.11218.84	TPMT		P51580	-0.228142	0.182101	0.507371
LRTM2.8906.60	LRTM2	654429	Q8N967	-0.137166	0.18219	0.507371
GAA.9385.4	GAA	2548	P10253	0.270336	0.182547	0.507444
CNTF.3489.9	CNTF	1270	P26441	-0.0753354	0.18263	0.507444
UBB.6641.60	UBB	7314	P0CG47	-0.314376	0.182658	0.507444
FAIM.16594.44	FAIM	55179	Q9NVQ4	-0.22936	0.182803	0.507444
PAIP1.12430.78	PAIP1	10605	Q9H074	-0.101476	0.182839	0.507444
LYG2.15416.54	LYG2	254773	Q86SG7	-0.421007	0.18291	0.507444
HERC5.12934.1	HERC5	51191	Q9UII4	-0.195604	0.182928	0.507444
ABCC6.8935.22	ABCC6	368	O95255	0.12924	0.18307	0.507558
PXDNL.11324.3	PXDNL	137902	A1KZ92	0.116411	0.183185	0.507595
SRC.5488.74	SRC	6714	P12931	-0.626762	0.183378	0.507846
NAPA.4292.5	NAPA	8775	P54920	-0.360591	0.183516	0.507883
SNX5.18327.6	SNX5	27131	Q9Y5X3	-0.25034	0.183594	0.507883
NELL1.6544.33	NELL1	4745	Q92832	-0.39761	0.183805	0.507955
PSMD11.13572.43	PSMD11	5717	O00231	-0.270006	0.183823	0.507955
RIC3.11228.37	RIC3	79608	Q7Z5B4	0.100426	0.183931	0.507972
VWC2L.7995.16	VWC2L	402117	B2RUY7	0.149753	0.18411	0.508184
CANX.8834.58	CANX	821	P27824	0.10434	0.184312	0.508462
RPS27A.4474.19	RPS27A	6233	P62979	0.280336	0.184721	0.509034
ATP1B3.8990.42	ATP1B3	483	P54709	0.221962	0.184803	0.509034
IL20RA.5085.18	IL20RA	53832	Q9UHF4	0.105417	0.184825	0.509034
PLSCR3.11407.57	PLSCR3	57048	Q9NRY6	-0.179313	0.185192	0.509763
ARAF.12583.77	ARAF	369	P10398	-0.189382	0.185456	0.510208
MAPKAPK5.3821.28	MAPKAPK5	8550	Q8IW41	0.188333	0.185619	0.510376
HS3ST4.19370.30	HS3ST4	9951	Q9Y661	0.12707	0.186357	0.51203
TMPRSS11B.10895.28	TMPRSS11B	132724	Q86T26	0.247961	0.186531	0.51203
CX3CL1.2827.23	CX3CL1	6376	P78423	0.192725	0.186631	0.51203
TOMM20L.10817.26	TOMM20L	387990	Q6UXN7	-0.177145	0.186712	0.51203
CENPV.8817.29	CENPV	201161	Q7Z7K6	-0.279309	0.186733	0.51203
CTSC.3178.5	CTSC	1075	P53634	0.070147	0.187014	0.512109
OSBPL11.12878.60	OSBPL11		Q9BXB4	0.231391	0.187043	0.512109
SPINK8.7962.11	SPINK8	646424	P0C7L1	-0.242446	0.18707	0.512109
CA2.4970.55	CA2	760	P00918	-0.113425	0.187494	0.512775
BMPR1B.10550.37	BMPR1B	658	O00238	-0.115629	0.187518	0.512775
SIGIRR.8326.63	SIGIRR	59307	Q6IA17	-0.0994837	0.187838	0.512998
CLGN.10600.24	CLGN	4312	O14967	-0.310962	0.188085	0.512998
RUNX3.11138.16	RUNX3	864	Q13761	0.284916	0.188112	0.512998
UGT1A6.7891.45	UGT1A6	54578	P19224	0.348051	0.188311	0.512998
PCNP.17769.28	PCNP	57092	Q8WW12	0.293319	0.188366	0.512998
ADIPOQ.3554.24	ADIPOQ	9370	Q15848	0.454824	0.18853	0.512998
ADAMTS3.8845.2	ADAMTS3	9508	O15072	0.105951	0.188613	0.512998
POLR3F.11444.49	POLR3F		Q9H1D9	0.101471	0.189018	0.512998
IL2RG.2634.2	IL2RG	3561	P31785	-0.217805	0.189022	0.512998
TEX29.10557.6	TEX29	121793	Q8N6K0	0.220234	0.189089	0.512998
IL1RL2.2994.71	IL1RL2	8808	Q9HB29	0.1374	0.189261	0.512998
ENDOU.5656.53	ENDOU	8909	P21128	0.136395	0.189293	0.512998
HSD17B7.9929.16	HSD17B7	51478	P56937	-0.349624	0.189321	0.512998
MRPL21.8942.2	MRPL21	219927	Q7Z2W9	-0.173252	0.189383	0.512998
POR.2731.29	POR	5447	P16435	-0.355135	0.189509	0.512998
KEAP1.12568.14	KEAP1	9817	Q14145	-0.112807	0.189573	0.512998
OCRL.10011.65	OCRL	4952	Q01968	0.251785	0.189608	0.512998
TSSK2.7873.32	TSSK2	23617	Q96PF2	0.191165	0.18975	0.512998
SPOCK2.5491.12	SPOCK2	9806	Q92563	-0.260916	0.189783	0.512998
DEFB103A.5679.16	DEFB103A	414325	P81534	0.10845	0.189814	0.512998
FGF22.9513.9	FGF22	27006	Q9HCT0	0.168909	0.189857	0.512998
MREG.19145.4	MREG	55686	Q8N565	-0.122316	0.189993	0.512998
GH1.8462.18	GH1	2688	P01241	-0.0784232	0.190072	0.512998
CYB5R1.18255.6	CYB5R1	51706	Q9UHQ9	0.150503	0.190159	0.512998
ROBO4.16297.14	ROBO4	54538	Q8WZ75	-0.394993	0.190198	0.512998
TFAM.9952.57	TFAM	7019	Q00059	-0.621457	0.190269	0.512998
GHRL.8447.11	GHRL	51738	Q9UBU3	0.180833	0.190705	0.513275
NR1H4.8946.38	NR1H4	9971	Q96RI1	0.0937337	0.190753	0.513275
TTC17.9550.153	TTC17	55761	Q96AE7	-0.197705	0.190777	0.513275
SERPIND1.3316.58	SERPIND1	3053	P05546	-0.27523	0.190956	0.513275
TNFRSF14.5352.11	TNFRSF14	8764	Q92956	0.169935	0.191058	0.513275
FGF6.4130.71	FGF6	2251	P10767	0.25067	0.191061	0.513275
ARL5B.17404.5	ARL5B	221079	Q96KC2	0.193346	0.191091	0.513275
LAT.10551.7	LAT	27040	O43561	-0.729446	0.191219	0.513342
ARFIP1.13488.3	ARFIP1	27236	P53367	-0.32902	0.191522	0.513879
CDH6.16312.45	CDH6	1004	P55285	-0.143185	0.191775	0.514283
PTPRD.9296.15	PTPRD	5789	P23468	-0.273994	0.192047	0.514735
CD1D.8749.194	CD1D	912	P15813	0.148033	0.192302	0.514806
PTPN11.3397.7	PTPN11	5781	Q06124	0.268532	0.19235	0.514806
SGTA.3868.8	SGTA	6449	O43765	-0.325597	0.192413	0.514806
ST6GALNAC2.7823.22	ST6GALNAC2	10610	Q9UJ37	-0.284667	0.19253	0.514806
KLRC3.7795.14	KLRC3	3823	Q07444	0.227061	0.192657	0.514806
TTL.13973.62	TTL		Q8NG68	-0.23927	0.192692	0.514806
FGF18.2761.49	FGF18	8817	O76093	0.23486	0.192931	0.515171
RPIA.12333.87	RPIA	22934	P49247	-0.262877	0.193052	0.515175
DYNLT3.12867.40	DYNLT3		P51808	0.108015	0.193236	0.515175
TG.18839.24	TG	7038	P01266	0.573452	0.193576	0.515175
CBX5.4540.11	CBX5	23468	P45973	0.142438	0.193584	0.515175
TNC.2728.62	TNC	3371	P24821	0.169587	0.193611	0.515175
DNM2.11572.4	DNM2	1785	P50570	-0.330921	0.193647	0.515175
HTR7.13547.5	HTR7	3363	P34969	-0.336904	0.193661	0.515175
RPS27A.2846.24	RPS27A	6233	P62979	0.349509	0.193758	0.515175
FGFR3.3809.1	FGFR3	2261	P22607	0.2029	0.194234	0.516167
NEFH.9900.36	NEFH	4744	P12036	0.145541	0.194529	0.516674
JAM3.2998.53	JAM3	83700	Q9BX67	0.166042	0.194826	0.51689
TPO.3873.51	TPO	7173	P07202	0.217843	0.194827	0.51689
SORCS1.15636.49	SORCS1	114815	Q8WY21	0.164504	0.19517	0.51689
PLXDC2.11342.59	PLXDC2	84898	Q6UX71	-0.342579	0.195199	0.51689
ODC1.13689.2	ODC1	4953	P11926	-0.205824	0.195205	0.51689
ANXA1.4960.72	ANXA1	301	P04083	0.455999	0.19523	0.51689
SPOCK3.9906.21	SPOCK3	50859	Q9BQ16	-0.341525	0.195669	0.517624
IVD.17737.7	IVD	3712	P26440	-0.466113	0.195715	0.517624
NTMT1.12454.105	NTMT1		Q9BV86	-0.0960156	0.195905	0.517628
VNN2.15480.2	VNN2	8875	O95498	0.404003	0.195944	0.517628
CABP7.7104.71	CABP7	164633	Q86V35	-0.233465	0.196027	0.517628
WFDC6.13412.5	WFDC6	140870	Q9BQY6	0.319755	0.196188	0.517778
PRSS35.9983.97	PRSS35	167681	Q8N3Z0	-0.161424	0.196758	0.519008
BAD.5870.23	BAD	572	Q92934	-0.250784	0.196876	0.519046
RET.3220.40	RET	5979	P07949	-0.271201	0.197017	0.519143
PSG1.15631.18	PSG1	5669	P11464	-0.102323	0.197346	0.519227
EQTN.11162.37	EQTN		Q9NQ60	-0.297516	0.197448	0.519227
FUT8.8244.16	FUT8	2530	Q9BYC5	-0.418267	0.197536	0.519227
OLFM3.10643.16	OLFM3	118427	Q96PB7	-0.16488	0.197612	0.519227
ASAP2.13518.5	ASAP2	8853	O43150	-0.332523	0.197613	0.519227
DUS2.13506.10	DUS2		Q9NX74	-0.161195	0.197811	0.519227
HAAO.5861.78	HAAO	23498	P46952	-0.215933	0.197845	0.519227
AGR2.4959.2	AGR2	10551	O95994	0.109786	0.19788	0.519227
NR1H2.9016.12	NR1H2	7376	P55055	-0.135603	0.198316	0.520097
GMDS.18337.4	GMDS	2762	O60547	-0.225181	0.198648	0.520695
HEXB.15470.11	HEXB	3074	P07686	-0.315486	0.198902	0.520774
LYN.3453.87	LYN	4067	P07948	-0.466781	0.198917	0.520774
PARK7.19545.145	PARK7		Q99497	-0.171771	0.199114	0.520774
NTM.8428.102	NTM	50863	Q9P121	-0.253427	0.199149	0.520774
SMCO2.7925.18	SMCO2	341346	A6NFE2	0.131774	0.199199	0.520774
MOCS3.14229.5	MOCS3		O95396	-0.159954	0.199681	0.521278
HTRA2.3317.33	HTRA2	27429	O43464	0.231361	0.199705	0.521278
PSMG3.12729.12	PSMG3		Q9BT73	-0.209115	0.199756	0.521278
AP1S2.18405.117	AP1S2	8905	P56377	-0.117662	0.199841	0.521278
OVCA2.17697.2	OVCA2	124641	Q8WZ82	-0.312657	0.199914	0.521278
SH3BGRL.12693.2	SH3BGRL	6451	O75368	0.194982	0.200187	0.521278
RNF148.7742.11	RNF148	378925	Q8N7C7	-0.175996	0.200198	0.521278
CERS5.13494.6	CERS5		Q8N5B7	0.125118	0.200227	0.521278
UNC13A.14052.26	UNC13A	23025	Q9UPW8	0.0872324	0.200476	0.521656
CFHR2.15584.9	CFHR2	3080	P36980	0.410722	0.200811	0.522254
EIF4EBP3.18859.7	EIF4EBP3	8637	O60516	0.286892	0.201029	0.52255
LYSMD4.9106.87	LYSMD4	145748	Q5XG99	-0.128861	0.201594	0.523747
NUP98.12772.8	NUP98		P52948	0.148056	0.201752	0.523883
LCMT1.4237.70	LCMT1	51451	Q9UIC8	0.102826	0.202464	0.52546
DVL2.13575.40	DVL2		O14641	-0.19113	0.203075	0.526362
MAPK10.15418.25	MAPK10	5602	P53779	-0.519437	0.203113	0.526362
SAR1A.17726.3	SAR1A	56681	Q9NR31	-0.689311	0.203128	0.526362
VAMP4.7732.45	VAMP4	8674	O75379	-0.0670373	0.203557	0.527201
SOS1.9923.6	SOS1	6654	Q07889	-0.142854	0.204363	0.529015
TBX3.13978.122	TBX3	6926	O15119	-0.147684	0.204612	0.529328
HMOX1.17398.55	HMOX1	3162	P09601	0.361648	0.20478	0.529328
CD8B.9310.2	CD8B	926	P10966	-0.210788	0.204964	0.529328
FAS.5392.73	FAS	355	P25445	0.292308	0.204968	0.529328
TIGAR.12476.50	TIGAR	57103	Q9NQ88	-0.106571	0.205113	0.529328
MRPL34.6933.20	MRPL34	64981	Q9BQ48	0.113792	0.205311	0.529328
ACADVL.19262.219	ACADVL	37	P49748	-0.558918	0.205605	0.529328
RFNG.7203.125	RFNG	5986	Q9Y644	0.120115	0.205697	0.529328
COL9A1.6631.17	COL9A1	1297	P20849	0.0985495	0.205739	0.529328
MANF.9223.11	MANF	7873	P55145	-0.574738	0.205739	0.529328
SHMT2.12691.44	SHMT2	6472	P34897	-0.593494	0.205749	0.529328
PRG2.7258.5	PRG2	5553	P13727	-0.20028	0.205755	0.529328
RLBP1.12936.38	RLBP1		P12271	0.109434	0.205971	0.52961
NXPH3.6054.6	NXPH3	11248	O95157	0.103697	0.206236	0.530018
IRAK4.18162.167	IRAK4	51135	Q9NWZ3	-0.209465	0.206391	0.530043
FKBP3.18383.9	FKBP3	2287	Q00688	-0.313271	0.206458	0.530043
FCN1.15582.25	FCN1	2219	O00602	0.238121	0.206883	0.530861
SUDS3.10703.203	SUDS3	64426	Q9H7L9	0.101099	0.207318	0.531704
NMT2.17821.20	NMT2	9397	O60551	-0.239974	0.207471	0.531825
SNAP29.12357.41	SNAP29	9342	O95721	-0.210097	0.207787	0.532362
DTD2.18280.29	DTD2	112487	Q96FN9	-0.234366	0.207949	0.532503
GRID1.13493.5	GRID1		Q9ULK0	0.116518	0.208062	0.532518
CNP.6609.22	CNP	1267	P09543	-0.281506	0.208185	0.532518
PMS2.11312.40	PMS2		P54278	-0.12937	0.208398	0.532518
RPL12.19183.164	RPL12	6136	P30050	0.236294	0.208444	0.532518
GDF10.6517.14	GDF10	2662	P55107	0.0796025	0.208492	0.532518
P4HA1.11645.9	P4HA1	5033	P13674	0.115395	0.208594	0.532518
PNPO.17804.102	PNPO	55163	Q9NVS9	-0.133409	0.208811	0.5328
BMPR2.4862.63	BMPR2	659	Q13873	0.252039	0.209261	0.533675
DUSP15.12838.28	DUSP15		Q9H1R2	-0.239039	0.209575	0.53403
ARPP21.12860.7	ARPP21	10777	Q9UBL0	-0.194875	0.20964	0.53403
F11.2190.55	F11	2160	P03951	-0.249911	0.209721	0.53403
SHC4.11692.21	SHC4		Q6S5L8	0.164147	0.209916	0.534255
PCDHB10.9963.19	PCDHB10	56126	Q9UN67	-0.152369	0.210264	0.534744
PRKCB.5475.10	PRKCB	5579	P05771	-0.491334	0.210323	0.534744
GSTK1.13474.40	GSTK1	373156	Q9Y2Q3	-0.449476	0.210649	0.5353
NEURL1.13604.27	NEURL1		O76050	0.233202	0.210951	0.535797
USP8.13450.49	USP8		P40818	-0.356206	0.211491	0.536724
SIRPG.9241.40	SIRPG	55423	Q9P1W8	-0.124364	0.211531	0.536724
SYT2.9577.26	SYT2	127833	Q8N9I0	-0.162046	0.211739	0.536756
GRB14.13628.58	GRB14		Q14449	-0.128685	0.2118	0.536756
NAAA.3173.49	NAAA	27163	Q02083	-0.335569	0.211978	0.536756
CTSS.3181.50	CTSS	1520	P25774	0.236029	0.211991	0.536756
CTBP1.11217.16	CTBP1	1487	Q13363	-0.170327	0.212083	0.536756
BIN1.9574.11	BIN1	274	O00499	-0.193388	0.21221	0.536756
OLFM2.19377.14	OLFM2	93145	O95897	-0.420686	0.212354	0.536756
LYPD1.9327.3	LYPD1	116372	Q8N2G4	0.0839701	0.212508	0.536756
APOA4.17685.9	APOA4	337	P06727	-0.348627	0.212511	0.536756
GCNT1.7016.12	GCNT1	2650	Q02742	0.119801	0.213352	0.53792
PFDN5.4271.75	PFDN5	5204	Q99471	0.166953	0.213358	0.53792
TRAPPC4.7007.24	TRAPPC4	51399	Q9Y296	0.105094	0.213432	0.53792
TXN.8813.160	TXN	7295	P10599	0.392138	0.213532	0.53792
CDKN1B.3719.2	CDKN1B	1027	P46527	-0.18896	0.213599	0.53792
RMI1.13926.1	RMI1		Q9H9A7	0.122549	0.213618	0.53792
FAM163B.10880.38	FAM163B	642968	P0C2L3	0.120061	0.214293	0.539348
PCSK2.15440.57	PCSK2	5126	P16519	0.090771	0.214833	0.540415
GBP2.18891.98	GBP2	2634	P32456	0.287507	0.214933	0.540415
IL1RN.5353.89	IL1RN	3557	P18510	0.318162	0.215576	0.541759
NCK1.5014.49	NCK1	4690	P16333	0.245102	0.215837	0.542144
HARS.17450.51	HARS	3035	P12081	-0.318932	0.215995	0.542267
AOC1.15486.126	AOC1	26	P19801	0.55921	0.216133	0.542342
SLC4A8.12798.46	SLC4A8		Q2Y0W8	-0.176342	0.216523	0.543046
TGFB1.2333.72	TGFB1	7040	P01137	0.215758	0.217016	0.544009
ARL5A.18414.26	ARL5A	26225	Q9Y689	0.105915	0.217291	0.544327
BMP2.15666.21	BMP2	650	P12643	0.102357	0.217472	0.544327
MRAP.7895.108	MRAP	4043	Q8TCY5	0.103324	0.21764	0.544327
ITGAL.11617.1	ITGAL	3683	P20701	0.129564	0.217696	0.544327
[truncated: 2,999 more rows]

## Sheet: Table S7_NES Ranked.
Supplementary Table 7. Biological processes differentially regulated in severe COVID-19 patient with cardiac involvement.
GSEA was performed using GO data, along with SASP protein sets to identify biological processes enriched in severe COVID-19 patients with cardiac involvement (n=15) compared to those without cardiac involvement (n=14). Pathways are ranked according to NES or adjusted P values. Only significant pathways (padj < 0.05 after Benjamini-Hochberg correction) are displayed.
Pathway	setSize	enrichmentScore	NES	pvalue	p.adjust	qvalues	core_enrichment
GO_BASEMENT_MEMBRANE	52	0.574681	1.99143	4.81417e-05	0.0247749	0.0224556	COL28A1/SMOC2/EGFLAM/CCDC80/EFNA5/COL18A1/TNC/NTN4/COL15A1/MATN2/DAG1/NTN1/LAMC2/THBS2/SMOC1/ADAMTS1/TMEFF1/VWA1/HSPG2/AGRN/ACAN/LOXL2/NID1/PTN/COL23A1/SERPINF1
GO_MUSCLE_FILAMENT_SLIDING	15	0.741823	1.98428	0.000257584	0.0342089	0.0310063	TTN/TNNT2/MYL3/TNNI2/ACTN2/MYL6B/VIM/TNNI3
GO_MYOFIBRIL_ASSEMBLY	27	0.635229	1.94297	0.000237523	0.0342089	0.0310063	TTN/TNNT2/CSRP3/MYOM2/ACTN2/CFL2/BMP10/LMOD1/MEF2C/EDN1/PDGFRA
GO_SARCOMERE_ORGANIZATION	19	0.685199	1.94131	0.000387329	0.0381193	0.0345506	TTN/TNNT2/CSRP3/MYOM2/ACTN2/CFL2/BMP10/MEF2C/EDN1
GO_STRUCTURAL_CONSTITUENT_OF_MUSCLE	19	0.676603	1.91695	0.000497994	0.0403738	0.0365942	TTN/MYL3/CSRP3/MYOM2/ACTN2/DAG1/MYL6B
GO_EXTRACELLULAR_MATRIX_STRUCTURAL_CONSTITUENT	83	0.51352	1.9085	4.51569e-05	0.0247749	0.0224556	PXDN/COL28A1/COL6A3/COL18A1/TNC/OGN/COL15A1/MATN3/MATN2/CILP/MGP/LAMC2/CD4/THBS2/SPON1/MEPE/MFAP4/LTBP4/VWA1/COL3A1/FBLN5/EFEMP1/HSPG2/COL6A2/IGFBP7/AGRN/MFGE8/ACAN/HAPLN1/DCN/PCOLCE/NID1/COL1A1/TINAGL1/COL23A1/POSTN/CTHRC1/CHI3L1/LAMA4/COL6A1
GO_ZYMOGEN_GRANULE	12	0.754016	1.90177	0.000591436	0.0434811	0.0394105	REG1A/TMED2/TMED10/STX3
GO_SPECIFIC_GRANULE	86	0.505906	1.88989	4.4958e-05	0.0247749	0.0224556	CEACAM8/LCN2/RETN/B2M/CD59/STX3/TCN1/PLAUR/TNFRSF1B/ELANE/LYZ/SLPI/LTF/ITGB2/CTSZ/PGLYRP1/HMOX2/PLAU/STX4/PTX3/SPTAN1/RAB27A/CLEC12A/FCAR/BPI/CD177/OLFM4/CD93/NEU1/MMP8/CANT1/STOM/PGRMC1/PTPN6/CKAP4/CHI3L1/VCL/CRISP3/FOLR3
GO_MISFOLDED_PROTEIN_BINDING	14	0.717061	1.88317	0.00083786	0.0466836	0.0423132	SDF2L1/HSPA1A/DNAJB9/HSPA1B/HSPA5/HSPA8/HSPA13
GO_COLLAGEN_CATABOLIC_PROCESS	30	0.599628	1.87536	0.000545738	0.040851	0.0370266	CST3/MMP10/PRSS2/COL15A1/PRTN3/MMP13/FURIN/CTSB/ADAM15/MMP19/MMP9/MMP16/MMP17/MMP8/ADAMTS3/CTSS/MMP7/MMP12
GO_HORMONE_ACTIVITY	82	0.502805	1.86531	0.000113143	0.0292625	0.026523	OXT/RETN/NPPB/UTS2B/CHGB/STC1/ADM/NMB/GCG/INHBB/CCK/AGRP/EDN2/CCL25/BMP10/NPPA/HAMP/POMC/PTH/INHBA/UCN3/EDN1/NTS/SCT/PYY/CALCB/TRH/PTHLH/GIP/ADCYAP1/INSL4/ADIPOQ/GHRL/TG/MLN/C1QTNF9/PENK/THPO/PRLH/ADM2/GPHA2/CRH/INS
GO_ACTIN_MEDIATED_CELL_CONTRACTION	36	0.571391	1.85639	0.000707357	0.045305	0.0410637	TTN/TNNT2/MYL3/TNNI2/ACTN2/DSC2/STC1/PARVA/MYL6B/VIM/TNNI3/FGF12/FLNA/KCNE5
GO_ACTIN_FILAMENT_BASED_MOVEMENT	38	0.564538	1.85046	0.000652873	0.045305	0.0410637	TTN/TNNT2/MYL3/TNNI2/ACTN2/DSC2/STC1/PARVA/MYL6B/VIM/TNNI3/FGF12/FLNA/KCNE5
GO_CELLULAR_COMPONENT_ASSEMBLY_INVOLVED_IN_MORPHOGENESIS	45	0.546757	1.84912	0.000416565	0.0381193	0.0345506	TTN/TNNT2/CSRP3/MYOM2/ACTN2/CFL2/GPC1/DAG1/BMP10/LMOD1/MEF2C/EDN1/PDGFRA
GO_INTERLEUKIN_10_PRODUCTION	34	0.572307	1.83697	0.000866507	0.0469396	0.0425453	HGF/CD274/TLR4/DLL1/LILRA5/ISG15/LGALS9/TNFRSF21/CD83/XCL1/PRKCZ/CLEC7A/CD46/MMP8/TNFSF4
GO_NEGATIVE_REGULATION_OF_TRANSMEMBRANE_RECEPTOR_PROTEIN_SERINE_THREONINE_KINASE_SIGNALING_PATHWAY	60	0.517279	1.83357	0.000353924	0.0381193	0.0345506	FSTL3/NBL1/BAMBI/BMPER/TWSG1/GREM1/CHRDL1/CILP/HSPA1A/GREM2/TGFB3/MAGI2/HTRA1/ABL1/VASN/FST/HSPA5/ADAMTSL2/SMURF1/TGFBR3/WFIKKN2/GDF3/CAV2/ADAM17/WFIKKN1/SPINT3/SFRP1/CHRD/VWC2L/RPS27A
GO_STRUCTURAL_MOLECULE_ACTIVITY	181	0.450739	1.81527	2.0813e-05	0.0214217	0.0194163	TTN/HSPB6/MYL3/PXDN/COL28A1/PI3/COL6A3/CSRP3/MYOM2/ACTN2/COL18A1/INA/TNC/OGN/COL15A1/KRT1/MATN3/MATN2/CILP/DAG1/MPZL1/MGP/LAMC2/CD4/THBS2/SPON1/MEPE/MFAP4/LTBP4/RPLP2/MYL6B/VWA1/CLTA/COL3A1/FBLN5/EFEMP1/HSPG2/COL6A2/IGFBP7/AGRN/MFGE8/SPTAN1/CLTC/ACAN/HAPLN1/VIM/DCN/KRT5/PCOLCE/NID1/COL1A1/JAG1/TINAGL1/MPZ/ASPH/COL23A1/POSTN/CTHRC1/SMTN/EVPL/CHI3L1/LAMA4/COL6A1/VCL/HMGA1/MRPL14/ANK2/MFAP2/RPS27A/A…
GO_MONOCYTE_CHEMOTAXIS	49	0.525122	1.80291	0.00065445	0.045305	0.0410637	NBL1/CCL23/GREM1/IL6/CCL25/CCL24/S100A12/CXCL10/FLT1/CCL20/CCL14/CCL21/CXCL12/CCL15/SLIT2/XCL1/CCL13/S100A14/CCL19
GO_RECEPTOR_REGULATOR_ACTIVITY	372	0.429187	1.79714	2.01252e-05	0.0214217	0.0194163	REG1A/OXT/PXDN/RETN/NBL1/NPPB/HDGF/EFNA5/UTS2B/TNFSF15/SECTM1/CHGB/SPP1/CCL23/STC1/OGN/ADM/NMB/GREM1/HGF/IL6/CXCL14/GCG/IL22/GDF15/VEGFC/CDNF/INHBB/CCK/AGRP/CXCL16/IL18BP/EDN2/GDNF/CCL25/GREM2/TGFB3/FGF19/IL16/FAM3D/BMP10/NPPA/HAMP/CCL24/TNFRSF11B/POMC/BMP7/CXCL10/GRN/IL2/CSF1/EFEMP1/PTH/CCL20/TDGF1/CCL14/NRG4/PSPN/SEMA3B/ANGPTL3/IL11/DKKL1/NTF4/FGF7/INHBA/CCL21/DEFB4A/IL18/ANGPT4/UCN3/LRPAP1/CCL…
GO_T_CELL_MEDIATED_IMMUNITY	52	0.517139	1.79203	0.000698055	0.045305	0.0410637	B2M/BTN3A3/CLEC4G/TNFRSF1B/CD55/IL18R1/IL6/HLA-G/STX7/IL18/RAB27A/IL7R/XCL1/PRKCZ/IL4/CD46/JAG1/IL12RB1/CD8A/TNFSF4/AZGP1/IL18RAP/CTSC/CD1D/CTSH/FCGR2B/AGER/CD1A/IL23R/TSTA3/IL31RA/FAM49B
GO_EXTRACELLULAR_STRUCTURE_ORGANIZATION	201	0.441544	1.79142	2.06723e-05	0.0214217	0.0194163	CST3/PXDN/COL28A1/TNFRSF1A/SMOC2/EGFLAM/CCDC80/MMP10/COL6A3/PRSS2/SPP1/COL18A1/JAM2/DDR2/TNC/IBSP/TNFRSF1B/B4GALT1/NTN4/COL15A1/MATN3/GREM1/IL6/DAG1/ELANE/ADAMTS5/LAMC2/MMP13/ITGB2/ITGB7/MFAP4/ADAMTS4/TNFRSF11B/VWA1/HTRA1/FURIN/VIT/ABL1/COL3A1/FBLN5/HSPG2/COL6A2/AGRN/PTX3/PLG/ADAM15/CTSG/ACAN/PRSS1/BSG/ADAM12/CDH1/HAPLN1/ADAMTSL2/PDGFRA/MMP19/PLOD2/DCN/SCUBE3/CAV2/MMP9/KLK4/LOXL2/MMP16/NID1/COL1A…
GO_EXTRACELLULAR_MATRIX_DISASSEMBLY	57	0.507021	1.78357	0.000737218	0.045305	0.0410637	CST3/MMP10/PRSS2/DDR2/IL6/ELANE/ADAMTS5/MMP13/ADAMTS4/HTRA1/FURIN/PLG/ADAM15/CTSG/PRSS1/BSG/MMP19/SCUBE3/MMP9/KLK4/MMP16/SCUBE1/MMP8/CMA1/KLK5/DDR1/CTRB1/CTSS/TGFB1/MMP7/CTRB2/MMP12/TLL1
GO_TERTIARY_GRANULE	88	0.466773	1.74871	0.000425913	0.0381193	0.0345506	CEACAM8/CD58/CST3/B2M/CD59/TCN1/CD300A/CD55/LYZ/LTF/ITGB2/PRSS3/STX7/PGLYRP1/DYNLL1/PLAU/PTX3/SPTAN1/SIGLEC14/SIGLEC5/CLEC12A/FCAR/MMP9/CD177/OLFM4/CD93/MMP8/CANT1/STOM/PTPN6/ASAH1/CRISP3/FOLR3/TNFAIP6/SIRPA/GAA/CTSS/CTSH/MCEMP1/AP2A2
GO_ANTIMICROBIAL_HUMORAL_RESPONSE	76	0.469702	1.72538	0.000730343	0.045305	0.0410637	REG1A/RNASE6/LCN2/PI3/REG1B/REG3A/PRSS2/ELANE/LYZ/PRTN3/PLA2G2A/SLPI/LTF/RARRES2/DEFA5/SPON2/PRSS3/S100A12/PLA2G1B/CXCL10/PGLYRP1/HTN1/DEFB4A/CTSG/CXCL13/CXCL9/BPI/CCL13
GO_G_PROTEIN_COUPLED_RECEPTOR_BINDING	152	0.433272	1.72048	0.00010574	0.0292625	0.026523	OXT/BAMBI/ROR2/UTS2B/CCL23/RSPO3/ADM/NMB/CXCL14/GCG/CXCL16/HSPA1A/TFF2/EDN2/TAC1/CCL25/RSPO1/NPPA/MAGI2/CCL24/POMC/CXCL10/HSPA1B/IL2/PTH/CCL20/CCL14/PROK2/CCL21/DEFB4A/GNAS/UCN3/CCL27/CXCL12/EDN1/CCL15/CXCL13/HSPA8/WNT11/CXCL9/FLNA/XCL1/PALM/CCL13/S100A14/SCT/CCL28/MYOC/CCL19/PYY/CALCB/NMU/CTHRC1/SAA1/SDCBP/SFRP1/ADCYAP1/PROK1/CXCL8/CX3CL1/DEFB103A/GHRL/PTPN11/FCN1/MRAP/MLN/PENK/CCL3/CCL2/PRLH/GP…
GO_HYDROLASE_ACTIVITY_ACTING_ON_ACID_PHOSPHORUS_NITROGEN_BONDS	105	0.443909	1.69856	0.000460931	0.0395344	0.0358333	F3/KLK11/PRSS2/PRSS22/HGF/ELANE/PCSK1/PCSK2/PRTN3/LTF/KLK8/PRSS3/PRSS8/LONP1/HTRA1/FURIN/CPD/PLAU/PROC/PLG/KLK13/CTSG/DPP10/PRSS1/MMP9/KLK4/TPSG1/TMPRSS15/GZMH/PRSS57/CFD/MMP8/CMA1/KLK3/CELA1/MBTPS1/KLK5/PCSK7/KLK10/CTRB1/TMPRSS11B/CTSC/ENDOU/HTRA2/NUP98/CTSH/MMP7/CTRB2/MASP1/KLK9
GO_RESPONSE_TO_BMP	82	0.457628	1.69771	0.000859884	0.0469396	0.0425453	FSTL3/ACVRL1/NBL1/ROR2/BMPER/TWSG1/GREM1/CHRDL1/GDF15/RGMB/GREM2/TGFB3/BMP10/FSTL1/BMP7/HTRA1/ABL1/TDGF1/FST/SMURF1/TGFBR3/GDF3/GDF7/GDF9/SFRP4/CFC1/SFRP1/CHRD/VWC2L/GDF10/BMPR2/TGFB1/BMP2/NODAL/BMP6/TNMD/LRP2
GO_GROWTH_FACTOR_ACTIVITY	127	0.431767	1.68669	0.000193403	0.0342089	0.0310063	REG1A/HDGF/OGN/HGF/IL6/GDF15/VEGFC/CDNF/INHBB/GDNF/TGFB3/FGF19/BMP10/BMP7/GRN/IL2/CSF1/EFEMP1/TDGF1/NRG4/PSPN/ANGPTL3/IL11/NTF4/FGF7/INHBA/CXCL12/VEGFA/FGF5/TFF1/NRG1/GDF3/FGF12/LIF/FGF4/IL4/GDF7/PTN/JAG1/GDF9/CD320/FGF3/CLEC11A/PGF/BTC/FGF8/MDK/FGF23/JAG2/PROK1/ENDOU/FGF22/FGF6/FGF18/GDF10/TGFB1/BMP2/NODAL/FGF20/BMP6/CSF2/IL9/THPO/NGF/THBS4/GDF5/NRG2
GO_REGULATION_OF_TRANSMEMBRANE_RECEPTOR_PROTEIN_SERINE_THREONINE_KINASE_SIGNALING_PATHWAY	115	0.43507	1.68149	0.000304341	0.0357992	0.0324478	FSTL3/ACVRL1/NBL1/BAMBI/BMPER/TWSG1/GREM1/CHRDL1/CILP/GDF15/INHBB/HSPA1A/GREM2/TGFB3/BMP10/MAGI2/FSTL1/LTBP4/BMP7/HTRA1/ABL1/VASN/INHBA/FST/HSPA5/ADAMTSL2/SMURF1/TGFBR3/WFIKKN2/GDF3/CAV2/GDF7/GDF9/ADAM17/SFRP4/WFIKKN1/SPINT3/FOLR1/SDCBP/SFRP1/CHRD/VWC2L/RPS27A/GDF10/BMPR2/TGFB1/BMP2/NODAL/BMP6
SENESCENCE_ASSOCIATED_SECRETORY_PHENOTYPE_2	403	0.400158	1.67947	2.00961e-05	0.0214217	0.0194163	GM2A/FSTL3/CST3/PXDN/TNFRSF1A/PI3/B2M/NBL1/TAGLN/CCDC80/IGFBP2/CD59/MMP10/COL6A3/TXNDC5/LMAN2/PLAUR/SPP1/COL18A1/IGFBP4/STC1/MAP2K2/TNC/SPINK1/TNFRSF1B/B4GALT1/GPC1/COL15A1/HGF/IL6/ESM1/DAG1/GDF15/VEGFC/PRKCSH/RGMB/GDNF/CCL25/TFPI/RARRES2/LAMC2/MMP13/RNASE4/IL1RL1/THBS2/IGFBP6/NUCB1/CTSZ/SPON2/FSTL1/GLRX/CD14/TNFRSF11B/LTBP4/RPLP2/SVEP1/HTRA1/CXCL10/ANPEP/COL3A1/FBLN5/IL2/EFEMP1/CCL20/HSPG2/PLAU/…
[truncated: 50 more rows]

## Sheet: Table S7_Padj Ranked.
Supplementary Table 7. Biological processes differentially regulated in severe COVID-19 patient with cardiac involvement.
[truncated: 82 more rows]

## Sheet: Table S8_Padj Ranked.
Supplementary Table 8: Biological processes associated with increasing COVID-19 disease severity in the validation cohort.
[truncated: 8 more rows]

[truncated: 5 more sheets: Table S9_Padj Ranked., Table S10_Padj Ranked., Table S11_Padj Ranked., Table S12_Padj ranked., Table S13_Padj ranked.]
